# Supplementary material
Source: Research Square preprint supplement (doi:10.21203/rs.3.rs-9588231/v1)
Supplement: Supplementary file 1 [file a69995959d2a83e13472a944.xlsx]

## Sheet: Table S1
Table S1: Functional annotation of predicted proteins using PANNZER2
Query ID (qpid)	Annotation type	Annotation Score / Taxonomic Assignment	Prediction Confidence (PPV)	Annotation ID	Description/Sequence
g_1	original_DE	bac	n.d.	-21.3333	g_1
g_1	qseq	n.d.	n.d.	n.d.	MPKEQEKRARSQPEKGLPSGREQRQVGRGPQQAVLPGSRSQDLSVRGIHLPPLPHLESAQASGSRRAQADRPELRQGLPRSSGSGEGRPSLPALPPLPRQATSRKRGKTPLRETLWQWQPKSLRAHHLVKQRPCLQRLQCPGTFSTRWTGWSSATRSPTAASLGKGDSLCQPVEHPCMPLHPLSSLHMPLASARREGHFVPSPALLPEGALSLDSGSFVLRDWWEGNPDQRNTQKX
g_2	original_DE	bac	n.d.	-21.3333	g_2
g_2	qseq	n.d.	n.d.	n.d.	MPKEQEKRARSQPEKGLPSGREQRQVGRGPQQAVLPGSRSQDLSVRGIHLPPLPHLESAQASGSRRAQADRPELRQGLPRSSGSGEGRPSLPALPPLPRQAVPLTAARHNAATAQGQVPTLSTLPATASGSSPGGRAGAVGATTSRLAVPCLQGNPQRQDTVARAEGWQADLPVPTPPLRPANKTPKSLRLAYLMRPVAPRPGPWQKPAWPRQRAPTSTEETPARTTQVLAPKAGNGPKDETRPAASAQEGTGDADRVSTSRSLAAEQAADAGAKGAGTSQAMLGAKGNAGRARSARRGGMFLPCCLSSSTCSSLLTDEPEEGKDTAERDAVAVAAKEPASTPSGEAEALPPASPVPGNLQHEVDRLELSDTFTHRQRPWGRETASANLWSIPACPCTP…
g_3	original_DE	euk	n.d.	-21.3333	g_3
g_3	qseq	n.d.	n.d.	n.d.	MPKEQEKRARSQPEKGLPSGREQRQVGRGPQQAVLPGSRSQDLSVRGIHLPPLPHLESAQASGSRRAQADRPELRQGLPRSSGSGEGRPSLPALPPLPRQAVPLTAARQNAATAQGQVPTLSTLPATASGSSPRGRAGAVGATTSRLAVPCLQGNPQHQDVAARAEGWQADLPVPAPPLKPADKTPKSLRLAYLMRPAARRPGPCQKPAWPRQRAPTSAVRTAARTTQVLAPKAGNGPKDETRPAASAQEGTGDADRVSTSRSLAAEQAADAGANGAGTSQATLGAKGNAGRARSARRGGMFLPCCLCSSTCSSLLTDEREEGKDTAERDAVAVAAKEPASTPFGEAEALPPASPVPGNLQHEVDRLELRDSSLQMDEDEX
g_4	original_DE	euk	n.d.	-21.3333	g_4
g_4	qseq	n.d.	n.d.	n.d.	MPKEQEKRARSQPEKGLPSGREQRQVGRGPQQAVLPGSRSQDLSVRGIHLPPLPHLESAQASGSRRAQADRPELRQGLPRSSGSGEGRPSLPALPPLPRQAVPLTAARQNAATAQGQVPTLSTLPATASGSSPRGRAGAVGATTSRLAVPCLQGNPQHQDVAARAEGWQADLPVPAPPLKPADKTPKSLRLAYLMRPAARRPGPCQKPAWPRQRAPTSAVRTAARTTQVLAPKAGNGPKDETRPAASAQEGTGDADRVSTSRSLAAEQAADAGANGAGTSQATLGAKGNAGRARSARRGGMFLPCCLCSSTCSSLLTDEREEGKDTAERDAVAVAAKEPASTPFGEAEALPPASPVPGNLQHEVDRLELRDSSLQMDEDEX
g_5	original_DE	bac	n.d.	-21.3333	g_5
g_5	qseq	n.d.	n.d.	n.d.	MCKRQSGRNSQLTEAAAPHTRAKRNHRHTYREGQKAATRAPPTPQLAFPQSRQAPQRHQQSASRAKSTVAPPSTDGASTLCTARCRRPGVQPPAGHRAEGVEAPRPLSPRHPPPNPRGRPANGRSSGMRSPKSAAPHRGGEGAPLRVRPSIRIRRRPRRGRGHRPEAPPPPSRRVQPRGWSRSASDSAAPPSARPHLELALPPRAAGAAASPRSPLTRPSPWCLAPPRGRRTALALAPRRGEADSGRRTSLCAPRLEVSGDGPLFAPRLRLPAERRAVTERRGGEAPARAAGSARPFCRPVKCHGSPRLLPAAAAPRVAHLGRGQKRGRQNPPRLRRAERERPAPPPGKRRGQPRCRRGWSPPGMGNFAGGLRDGAVGWCGVGVGAKDAVMTAVPPLPT…
g_6	original_DE	euk	n.d.	-21.3333	g_6
g_6	qseq	n.d.	n.d.	n.d.	MLHTAVSCWQPFLGLAVLLVFMGPTFGCPARCECSAQNKSVSCHRRRLLSIPEGIPIETKILDLSKNRLKSVNPEEFMSYPLLEEIDLSDNIIANVEPGAFNNLFNLRSLRLKGNRLKLVPLGVFTGLSNLTKLDISENKIVILLDYMFQDLHNLKSLEVGDNDLVYISHRAFSGLLSLEQLTLERCNLTAVPTEALSHLHNLISLHLKQLNINALPAYAFKRLFRLKDLEIDSWPLLDMLPANSLYGLNLTSLSITNTNLSAVPYTAFKHLVYLTHLNLSYNPISTIEAGMLSDLVRLQELHMVGAQLRTIEPHAFQGLRFLRVLNVSQNLLETLEENVFHSPKALEILCINNNPLACDCRLLWILQRQPTLQFGGQPPMCAGPDSVKERSFKDFHST…
g_6	DE	2.35105	0.914168	0.891304	Leucine rich repeat and Ig domain containing 2
g_6	GN	n.d.	n.d.	n.d.	LINGO2
g_6	CC_ARGOT	2.52381	0.535372	5886	plasma membrane
g_6	BP_ARGOT	0.857049	0.439122	51965	positive regulation of synapse assembly
g_7	original_DE	bac	n.d.	-21.3333	g_7
g_7	qseq	n.d.	n.d.	n.d.	MRAQRPTDRPRRCTQPAPAATSPSHSQALPRPLLRPPHNSNPLRAAPPDSTPISAIFHFGKVPHPVQVGSHVRLLHLPSLREREATATDRHDHLTCTPSARPHRAAHAPEX
g_8	original_DE	euk	n.d.	-21.3333	g_8
g_8	qseq	n.d.	n.d.	n.d.	MEALVQGQPNGLQEGQQKGCASEDKQVTEQLTVLQARTEGPKPALSDQGPSSLRWAQPGCGLPSPQAAGESTRRRSPEKREPSGRRRAAKHQSQPGRRGLLGSGRTARSGEVGGNGARDLPPYLCLSRWLPRSAPKRRLHATPQRGSPRPPTPPSRYPVPCPAPAARPHTLGWAPAGARPLSGVGRPRGCRNGGAALPPSAPSHPGCPASRLRSRTGRSETSRQTYLSSGLERCGGVGDEAGRSETPKPSRGAAGNAGAVGLCHGVVWVX
g_9	original_DE	euk	n.d.	-21.3333	g_9
g_9	qseq	n.d.	n.d.	n.d.	MSVAPVRGRKTKRISTQLEQKKEEEGKVEEADTVRGPEEWLQDPGEAPLSPGEGPSIRPQSPTPRRVRSPERQGAEQDIVTIVDRSLKMNEIRGLRKDFSRHPNEPIVTWLLRCWDNGANSVWLDSREARQLGGIARDSAIDRGISTCQNGSFTLWKRMLLAVKERYPFKDDLMPEKKKWTDMEEGISYLREYAVVEMLHSPTFIPDEPDQEHDPERVRCTPNMWRTFTKTAPERHASTFAAMYGRGERRPVINDLVNKLQDYELHLTPLRACVSAITKVVEKLDRMESKQEDIIDELSTMLNADGSMVVPDTSDEDQNSQNCLLEELINLVSSQPASSNISAIKRRRPPARANDNRRTTSRLALWRFLRDRGEDMEKWHDQPTPALQARVTELQDRST…
g_10	original_DE	euk	n.d.	-16.25	g_10
g_10	qseq	n.d.	n.d.	n.d.	MPSSHQGTKSIYIHGVTGGSQELTMLEAEISLTGKDWQKHPIVTGPGAPCILGIDYLRMGYFKDPKGYRWAFGIAAVDTEGVKQLSVLPGLSEDPSVVGLLRVKEQQVPIATKTVHRRQYRTNRDSLLPIHELIRQLESQGVISKTHSPFNSPIWPVRKASGEWRLTVDYRGLNEVTPPLSAAVPDMLELQYELESKAAKWYATIDIANAFFSIPLATECRPQFAFTWRGIQYTWNRLPQGWKHSPTICHGLIQTVLEQGSAPEHLQYIDDIIVWGNTAREVFEKGEEIIQILLRAGFAIKRSKVKGPAREIQFLGIKWQDGRRYIPIDVINKITAMSPPTNKKETQSFLGIVGFWRMHVPNYSLIVSPLYQVTRKKNDFTWGPEQQQAFEQIKQEIAR…
g_10	DE	0.847216	0.435619	0.785714	ribonuclease H
g_10	MF_ARGOT	9.06427	0.741853	4523	RNA-DNA hybrid ribonuclease activity
g_10	EC_ARGOT	9.06427	0.741853	EC:3.1.26.4	GO:0004523
g_10	BP_ARGOT	5.05706	0.631225	15074	DNA integration
g_10	CC_ARGOT	0.0153188	0.322671	16020	membrane
g_10	BP_ARGOT	0.40365	0.396951	9987	cellular process
g_10	MF_ARGOT	2.39735	0.529519	46872	metal ion binding
g_10	MF_ARGOT	2.12939	0.516582	3676	nucleic acid binding
g_11	original_DE	euk	n.d.	-16.25	g_11
g_11	qseq	n.d.	n.d.	n.d.	MTAPQATAAVSQQRLSLPLQRPVIAIVRNFVPTPCCQRGLHLPECIAAAARPLCSLRPARCLLGLVVSAPPTGVSSGISSGGVQGSFRQX
g_12	original_DE	euk	n.d.	-16.25	g_12
g_12	qseq	n.d.	n.d.	n.d.	MFGQRDTFCYTTLQHHMALLASSTPTPNAAPVHGRRMFPRSGAGGSTPEGAGAVAEAAGPGRGAALRPPPPEARARAMPGRKSSKEKKRRRSRSCCPEGAAGGDRKRRSAESGRAAPEAFRAVTGLVSKRLGWSYGMSGLIFLAAMPAVFX
g_13	original_DE	bac	n.d.	-16.25	g_13
g_13	qseq	n.d.	n.d.	n.d.	MALTPSTTLETTTLKDTEADNEQLDRKEEGKELLEARMLLGFSTEKESEIVGDPEIPDPGGGCGNNSGVSLVCRSLEGTQTLQIADKMALTTLAQTALALTTPTKQKEEQEGDQTVGVEKRGTDFDDTGVVRSREEETERVGDDARDQWPSASPLLVRCRMICGTQLX
g_14	original_DE	euk	n.d.	-16.25	g_14
g_14	qseq	n.d.	n.d.	n.d.	MRRTCAVYGRWGCNGSLRRGRAWLAAGVGRGGRGAGRAEFSEAGGEKGWRGRSQGCPQQLAERYADLAASHCEALQQREEGEWHNAQLRLENVRLRLENRRLRRENRCLFHQALLGTGPHESEKGERPGPGGEAEALRAQLERLQEKHRRALQHLRHCQEGAELDDGELEELLGDDALPPSTLEPEERGAAPVGGPEEEEAVLSCAGLGGDGGGTVLPLSPRCGKLLSEPGGRCGVX
g_14	DE	1.81451	0.800234	0.821429	Tumor suppressor candidate 1
g_14	GN	n.d.	n.d.	n.d.	TUSC1
g_15	original_DE	euk	n.d.	-16.25	g_15
g_15	qseq	n.d.	n.d.	n.d.	MEERPPSRPRVAWEETGAPEERRPPPEPYELTEVQPLHGDADSLPLTEEEEAMKNIECYLKSTEKTEMLKMTFLESICTICSVGSNKDSCESLAIFCRENNLAEEIKELLENEPVDQLRTAVRYQAMLAITALSSMKAIAQDEIRPLLNACCKVIFYLPPREDLNICLYNHTVQAMDHMLKTLLVTRHTSRSEELWNILEVLLHFTNDPNKTVRERAMERLWNLSRFITSNSCQEPFPEFLQPSQWTNVICMTLETMGECCAEDKECANSMLDVVLRDPATWVTDVPEVLGFIQRNLGSNSASVEQTLFSVLDVLTIEFPRDVLMSVLTDLPQHDSTTLDIWKRILSLAVTSESVLAELCGVLQDQELCGILNVNKAGLGFLLMTVMRPTEENLQELCK…
g_15	DE	0.59	0.10105	0.509804	Maestro-like HEAT-repeats domain-containing protein
g_15	CC_ARGOT	1.53785	0.484762	5737	cytoplasm
g_16	original_DE	bac	n.d.	-16.25	g_16
g_16	qseq	n.d.	n.d.	n.d.	MHSGNKGRGGAASPADLARGGSGLGVRTGPQPLSASGRLSSPRSEARASLALSRVDSYFGYSRLSRFVX
g_17	original_DE	euk	n.d.	-16.25	g_17
g_17	qseq	n.d.	n.d.	n.d.	MEERPPSRPRVAWEETGAPEERRPPPEPYELTEVQPLHGDADSLPLTEEEEAMKNIECYLKSTEKTEMLKMTFLESISTICSVDNNKDLRERLAIFCRENNLAEEIKELLENEPVDQLRTAVRYQAMLAIAALSSMKAIAQDEIRPLLNACCKVIFYLPPTEDLNICLYNHTVQAMDHMLKTLLFTRHTSRSEELWNILEVLLHFTNDPNKTVRERAMERLWNFSSIISSYSWQEPFPEFLHPCQWADIIFMSLETMEEWCTEDKLWANTMLDVVLRNPAIWVTDVPEVLGFIQRNLGSNSASVEQTLFSVLDVLTIEFPRDVLMSVLTDLPQHDSTTLDIWRRILSLVETSESILAELCGVLQDQELCGILNVNKAGLGFLLMTVMRPTEENLQELCK…
g_17	DE	3.79705	0.968076	0.509804	Maestro-like HEAT-repeats domain-containing protein
g_17	CC_ARGOT	1.53796	0.484769	5737	cytoplasm
g_18	original_DE	bac	n.d.	-16.25	g_18
g_18	qseq	n.d.	n.d.	n.d.	METCSAQCPSAAGGRARSAVALSWASRSSRSAPGAPPTLLLRPHHGPLFCPCCHRAAVKPLFRNARRSAHGPALAAAAPLWRGWSGSALARGSAGLRAQRPLLEPRCX
g_19	original_DE	euk	n.d.	-16.25	g_19
g_19	qseq	n.d.	n.d.	n.d.	MWPIAKLSEKLDTIVSNQEDIIDELSTMDNADGDQDSQLVFAQPASSNISAIKRRRPPARASDNSKNMSRFALWCYLRDHGEDMKKWHKKTTPALQARVKELQRRSATKVNFSKKVIAPVAAGHGNSRKTNGEDPSVVGLLRVKKQQVPIATKPVHRRQYRTNRDSLLPIHKLIRQLESQGVISKTHSPFNSPIWPVRKASGEWRLTVDYRGLNEVTPPLSAAVPDMLELQYELESKAAKWYATIDIANAFFSIPLAAECRPQFAFTWRGVQYTWNRLPQGWKHSPTICHGLIQAALEQGGAPEHLQYIDDIIVWGNTAREVFEKGEQIIQILLRAGFAIKRSKVKGPAQEIQFLGIKWQDGRRHIPMDVINKITAMSPPTNKKETQSFLGVVGFWRMH…
g_19	DE	0.79781	0.411498	0.785714	ribonuclease H
g_19	MF_ARGOT	8.41635	0.725939	4523	RNA-DNA hybrid ribonuclease activity
g_19	EC_ARGOT	8.41635	0.725939	EC:3.1.26.4	GO:0004523
g_19	BP_ARGOT	3.79906	0.587712	6259	DNA metabolic process
g_19	CC_ARGOT	0.0430613	0.334831	16020	membrane
g_19	BP_ARGOT	0.391279	0.395526	9987	cellular process
g_19	MF_ARGOT	2.26114	0.523038	46872	metal ion binding
g_19	BP_ARGOT	0.213261	0.371754	6508	proteolysis
g_19	MF_ARGOT	2.06412	0.51331	3676	nucleic acid binding
g_19	BP_ARGOT	0.154457	0.361765	34654	nucleobase-containing compound biosynthetic process
g_19	MF_ARGOT	0.39181	0.395588	3964	RNA-directed DNA polymerase activity
g_19	EC_ARGOT	0.39181	0.395588	EC:2.7.7.49	GO:0003964
g_19	MF_ARGOT	0.387624	0.395101	4190	aspartic-type endopeptidase activity
g_19	EC_ARGOT	0.387624	0.395101	EC:3.4.23.- EC:3.4.23.1 EC:3.4.23.15 EC:3.4.23.20 EC:3.4.23.25 EC:3.4.23.32 EC:3.4.23.34 EC:3.4.23.35 EC:3.4.23.36 EC:3.4.23.4 EC:3.4.23.43 EC:3.4.23.49 EC:3.4.23.5	GO:0004190
g_20	original_DE	euk	n.d.	-16.25	g_20
g_20	qseq	n.d.	n.d.	n.d.	DAMSPVSPRSLLIYSTGALAKAVCEKMFNWMVVRIDNLLETKEPHQYFVGVLDIFPLRSSMX
g_21	original_DE	euk	n.d.	-16.25	g_21
g_21	qseq	n.d.	n.d.	n.d.	WWMHVPNYSLAVSPLYQVTWKKNDFTWGPEQQQAFEQIKQEIARAVALGPEQKGQDVKNILYTAAGEKGPTWSLWRRASGETRGRPLGFWSRAYKGSEECYTPTEKEILAAYEGDRAASEVVGTETQLLLAPRLPVLNWMFKGKVPSTHHATDATGSKWIALITQRARMVNLSHPGILEVIMDWPEGVMVLX
g_21	DE	0.721285	0.373082	0.706522	Reverse transcriptase/retrotransposon-derived protein RNase H-like domain-containing protein
g_21	MF_ARGOT	9.18786	0.744823	4523	RNA-DNA hybrid ribonuclease activity
g_21	EC_ARGOT	9.18786	0.744823	EC:3.1.26.4	GO:0004523
g_21	BP_ARGOT	3.97261	0.594104	6259	DNA metabolic process
g_21	BP_ARGOT	0.409154	0.397577	9987	cellular process
g_21	MF_ARGOT	2.15842	0.518021	3676	nucleic acid binding
g_22	original_DE	euk	n.d.	-16.25	g_22
g_22	qseq	n.d.	n.d.	n.d.	MVEATTGWLETFAVPHATARNTILGLEKQVLWRHGTPERIESDNGTHFKNSLVNTWAKDHGIEWIYHIPYHSPASGKIERYNGLLKTMLKAMCGGTFKHWEKHLAEATWLVNTRGSINRDGPASSLHTVKGDKVPVVHVKNMLGKAVWVFPASGKGKPLHGTVFAQGPGSTWWVMQKNGDIQCVPQGNLMLGECSQX
g_22	DE	0.755946	0.39064	0.666667	Integrase catalytic domain-containing protein
g_22	MF_ARGOT	7.19014	0.694046	3964	RNA-directed DNA polymerase activity
g_22	EC_ARGOT	7.19014	0.694046	EC:2.7.7.49	GO:0003964
g_22	BP_ARGOT	6.95087	0.687513	15074	DNA integration
g_22	BP_ARGOT	6.84033	0.684457	6278	RNA-templated DNA biosynthetic process
g_22	MF_ARGOT	5.29156	0.638709	4519	endonuclease activity
g_22	MF_ARGOT	2.97107	0.554978	35613	RNA stem-loop binding
g_23	original_DE	euk	n.d.	-16.25	g_23
g_23	qseq	n.d.	n.d.	n.d.	MSKLAGESESNLRKAFEEAEKNAPAIIFIDELDAIAPKREKTHGEVERRIVSQLLTLMDGLKQRAHVIVMAATNRPNSIDPALRRFGRFDREVDIGIPDATGRLEILQIHTKNMKLADDVDLEQVGNETHGHVGADLAALCSEAALQAIRKKMDLIDLEDETIDAEVMNSLAVTMDDFRWALSQSNPSALRETVVEVPQVTWEDIGGLEDVKRELQELVQYPVEHPDKFLKFGMTPSKGVLFYGPPGCGKTLLAKAIANECQANFISIKGPELLTMWFGESEANVREIFDKARQAAPCVLFFDELDSIAKARGGNIGDGGGAADRVINQILTEMDGMSTKKNVFIIGATNRPDIIDPAILRPGRLDQLIYIPLPDEKSRVAILKANLRKSPVAKDVDLD…
g_23	DE	2.28528	0.90359	0.318182	TERA ATPase (Fragment)
g_23	GN	n.d.	n.d.	n.d.	VCP
g_23	BP_ARGOT	12.6315	0.820752	51228	mitotic spindle disassembly
g_23	CC_ARGOT	11.7732	0.802912	34098	VCP-NPL4-UFD1 AAA ATPase complex
g_23	MF_ARGOT	9.95301	0.762783	31593	polyubiquitin modification-dependent protein binding
g_23	BP_ARGOT	11.7481	0.80238	1903513	endoplasmic reticulum to cytosol transport
g_23	MF_ARGOT	4.60074	0.616144	16887	ATP hydrolysis activity
g_23	BP_ARGOT	11.3869	0.79467	32527	protein exit from endoplasmic reticulum
g_23	BP_ARGOT	11.251	0.791738	97352	autophagosome maturation
g_23	BP_ARGOT	9.87264	0.76093	36503	ERAD pathway
g_23	MF_ARGOT	3.63134	0.581394	8289	lipid binding
g_23	CC_ARGOT	3.54206	0.577972	5829	cytosol
g_23	MF_ARGOT	3.05185	0.558358	5524	ATP binding
g_23	CC_ARGOT	3.40292	0.572551	5634	nucleus
g_23	CC_ARGOT	1.02089	0.451409	1990730	VCP-NSFL1C complex
g_23	CC_ARGOT	0.851104	0.438655	36513	Derlin-1 retrotranslocation complex
g_23	CC_ARGOT	0.593295	0.416541	10494	cytoplasmic stress granule
g_23	CC_ARGOT	0.586796	0.415927	35861	site of double-strand break
g_23	CC_ARGOT	0.502093	0.407587	48471	perinuclear region of cytoplasm
g_23	MF_ARGOT	0.994114	0.449472	1904288	BAT3 complex binding
g_23	CC_ARGOT	0.484159	0.405732	5811	lipid droplet
g_23	MF_ARGOT	0.954837	0.446583	35800	deubiquitinase activator activity
g_23	MF_ARGOT	0.880377	0.440939	140036	ubiquitin-modified protein reader activity
g_23	CC_ARGOT	0.459774	0.403155	1904949	ATPase complex
g_23	CC_ARGOT	0.430814	0.400004	502	proteasome complex
g_23	MF_ARGOT	0.824744	0.436564	42288	MHC class I protein binding
g_23	CC_ARGOT	0.378414	0.39402	45202	synapse
g_23	MF_ARGOT	0.733026	0.429016	1990381	ubiquitin-specific protease binding
g_23	MF_ARGOT	0.609441	0.418053	19903	protein phosphatase binding
g_23	CC_ARGOT	0.283252	0.381978	70013	intracellular organelle lumen
g_23	MF_ARGOT	0.535039	0.410908	31625	ubiquitin protein ligase binding
g_23	MF_ARGOT	0.510476	0.408442	19904	protein domain specific binding
g_23	MF_ARGOT	0.478874	0.405179	43531	ADP binding
g_23	MF_ARGOT	0.430207	0.399937	42802	identical protein binding
g_23	BP_ARGOT	2.61502	0.539503	6281	DNA repair
g_23	BP_ARGOT	1.07662	0.45536	72389	flavin adenine dinucleotide catabolic process
g_23	BP_ARGOT	1.02424	0.451649	61857	endoplasmic reticulum stress-induced pre-emptive quality control
g_23	BP_ARGOT	1.01348	0.450876	1903006	positive regulation of protein K63-linked deubiquitination
g_23	BP_ARGOT	0.995319	0.44956	1903862	positive regulation of oxidative phosphorylation
g_23	BP_ARGOT	0.99261	0.449362	1903843	cellular response to arsenite ion
g_23	BP_ARGOT	0.968294	0.44758	70842	aggresome assembly
g_23	BP_ARGOT	0.959028	0.446894	120186	negative regulation of protein localization to chromatin
g_23	BP_ARGOT	0.95105	0.446302	2001171	positive regulation of ATP biosynthetic process
g_23	BP_ARGOT	0.934428	0.445059	140455	cytoplasm protein quality control
g_23	BP_ARGOT	0.917767	0.443802	10918	positive regulation of mitochondrial membrane potential
g_23	BP_ARGOT	0.872078	0.440295	35617	stress granule disassembly
g_23	BP_ARGOT	0.811282	0.435483	32510	endosome to lysosome transport via multivesicular body sorting pathway
g_23	BP_ARGOT	0.771346	0.432224	1901224	positive regulation of non-canonical NF-kappaB signal transduction
g_23	BP_ARGOT	0.75514	0.430877	35331	negative regulation of hippo signaling
g_23	BP_ARGOT	0.721901	0.428069	45879	negative regulation of smoothened signaling pathway
g_23	BP_ARGOT	0.684317	0.424814	71218	cellular response to misfolded protein
g_23	BP_ARGOT	0.622554	0.419266	90263	positive regulation of canonical Wnt signaling pathway
g_23	BP_ARGOT	0.617546	0.418804	31334	positive regulation of protein-containing complex assembly
g_23	BP_ARGOT	0.571684	0.414485	32436	positive regulation of proteasomal ubiquitin-dependent protein catabolic process
g_23	BP_ARGOT	0.518181	0.409222	6734	NADH metabolic process
g_23	BP_ARGOT	0.514431	0.408843	43161	proteasome-mediated ubiquitin-dependent protein catabolic process
g_23	BP_ARGOT	0.497675	0.407133	34605	cellular response to heat
g_23	BP_ARGOT	0.416479	0.398405	19079	viral genome replication
g_23	BP_ARGOT	0.376606	0.393807	16567	protein ubiquitination
g_23	BP_ARGOT	0.333342	0.388532	46034	ATP metabolic process
g_23	BP_ARGOT	0.328741	0.387952	71897	DNA biosynthetic process
g_24	original_DE	euk	n.d.	-16.25	g_24
g_24	qseq	n.d.	n.d.	n.d.	MRVPNYSLIISPLYQVMRKKNNFAWGPEQQQAFEQIKQEIACAAALGAVWTGQDVKNILYTAAGEKGPTWSLWQRASGETRGRPLGFWSQAYRGSEECYTPTEKEILAAYEGGPGCTWWVMQKDGDVQCVPQGNLMLGECSQX
g_24	DE	0.689195	0.328703	0.706522	Reverse transcriptase/retrotransposon-derived protein RNase H-like domain-containing protein
g_25	original_DE	bac	n.d.	-16.25	g_25
g_25	qseq	n.d.	n.d.	n.d.	MVGRGLGLAAEALVLAQCSLAPLPLFYRDVVLPGLGQTGPGRYFLIALRRAAPEEAEVLGGLLLARSRSGACPQGTPVYLCCPPPGFPFRKVSSHGGMKLGRILSLX
g_26	original_DE	bac	n.d.	-16.25	g_26
g_26	qseq	n.d.	n.d.	n.d.	MTDASYGASPCILAHIWFIRLSPGALSAPVTLSELSVTRLSPFSLAVAPYSVSLCSYASQSRGKDSCRGGPSRLDFPIGGFLPLAVRPLLPGRATMTERPLRLADDCRAX
g_27	original_DE	euk	n.d.	-16.25	g_27
g_27	qseq	n.d.	n.d.	n.d.	MHVPNYSLIVSPLYQVTRKKNNFVWGPEQQQAFEQIKQEIARAVALGPVQTGQDVKNILYTAAGEKGPTWSLWQRASGETRGRPLGFWSRAYKGSEECYTPTEKEILAAYEGVRAASEVVGTETQLLLAPRLPVLNWMFKGKVPSTHHATDATWSKWIALITQRARMGNLSRPGILEVIMDWPEGKKFGTSPGEEVSRAKEAPPYNELPENEKKFALFTDGSCCIVGKHRRWKAAVWSPTRQVAEATEGEGESSQFAEWVMQKDGDVQCVPQGNLMLGECIQX
g_27	DE	0.747702	0.386488	0.575	RNase H type-1 domain-containing protein
g_27	MF_ARGOT	9.20702	0.745281	4523	RNA-DNA hybrid ribonuclease activity
g_27	EC_ARGOT	9.20702	0.745281	EC:3.1.26.4	GO:0004523
g_27	BP_ARGOT	3.9809	0.594406	6259	DNA metabolic process
g_27	BP_ARGOT	0.410007	0.397674	9987	cellular process
g_27	MF_ARGOT	2.16292	0.518244	3676	nucleic acid binding
g_28	original_DE	euk	n.d.	-16.25	g_28
g_28	qseq	n.d.	n.d.	n.d.	MIWGLANAYRALFDSIPEREKVFEIERECLRAERESLRETIQNERKSLQAEKENFQAERDSLLVERQDLQSERDSLRSERDALQNERDSLQSKLHNLQFQQDTLQSERDALWSERDILKSERDVLRTERDAFQQAKLSLQVEINRIQSNQAKLESELNTVIIERDGLQAKLETESIRINQPDQPQEATDSMSVAPVRGRKTKRISTQLEQKKEEEGKVEEADTVRGPEEWLQDPGEAPLSPGEGPSIRPQSPTPRRVRSPERQGAEQDIVTIVDRSLKMNEIRGLRKDFSRHPIEPIVTWLLRCWDNGANSVWLDSREARQLGGIARDSAIDRGISTCQNGSFTLWKQMLLAVKERYPFKDDLMPEKKKWTDMEEGISYLREYAVVEMLHSPTFIPDEP…
g_28	DE	0.889075	0.455637	0.785714	ribonuclease H
g_28	MF_ARGOT	9.21754	0.745533	4523	RNA-DNA hybrid ribonuclease activity
g_28	EC_ARGOT	9.21754	0.745533	EC:3.1.26.4	GO:0004523
g_28	BP_ARGOT	6.95268	0.687562	15074	DNA integration
g_28	CC_ARGOT	0.0218351	0.326156	16020	membrane
g_28	BP_ARGOT	2.80402	0.54784	6278	RNA-templated DNA biosynthetic process
g_28	BP_ARGOT	2.10677	0.515454	6310	DNA recombination
g_28	BP_ARGOT	1.60426	0.48861	6508	proteolysis
g_28	MF_ARGOT	2.94741	0.55398	3964	RNA-directed DNA polymerase activity
g_28	EC_ARGOT	2.94741	0.55398	EC:2.7.7.49	GO:0003964
g_28	MF_ARGOT	2.91593	0.552645	4190	aspartic-type endopeptidase activity
g_28	EC_ARGOT	2.91593	0.552645	EC:3.4.23.- EC:3.4.23.1 EC:3.4.23.15 EC:3.4.23.20 EC:3.4.23.25 EC:3.4.23.32 EC:3.4.23.34 EC:3.4.23.35 EC:3.4.23.36 EC:3.4.23.4 EC:3.4.23.43 EC:3.4.23.49 EC:3.4.23.5	GO:0004190
g_28	MF_ARGOT	2.47638	0.533194	46872	metal ion binding
g_28	MF_ARGOT	2.16539	0.518366	3676	nucleic acid binding
g_28	BP_ARGOT	0.178304	0.366012	19068	virion assembly
g_29	original_DE	euk	n.d.	-16.25	g_29
g_29	qseq	n.d.	n.d.	n.d.	MRKWHDQPTPVLRARRGPALSQGRERDNRVYWTVWIRWPGTSEPQKYKALVDTGAQCTLMPSSHEGTESIHISGVTGGSQELTVLEAEISLTGKDWQKHPIVTGPGAPCILGIDYLRRGHFKDPKGYRWAFGIAAVDMDNIKQLSVLPGLSEDPSVVGLLRVKEQQVPIATKTVHRRQYRTNRDSLLPIHELIHQLESQGVISKTHSPFNSPIWPVRKASGEWRLTVDYRGLNEVTPPLSAAVPDMLELQYELESKAAKWYATIDIANAFFSIPLATECRPQFAFTWRGVQYTWNRLPQGWKHSPTICHGLIQTVLEQGGAPEHLQYIDDIVVWGDTAEEVFTKGEQIIQILLRAGFAIKRSKVKGPAQEIQFLGIKWQDGRRHIPADVIDKITAMSPP…
g_29	DE	0.92321	0.471678	0.785714	ribonuclease H
g_29	MF_ARGOT	9.04413	0.741367	4523	RNA-DNA hybrid ribonuclease activity
g_29	EC_ARGOT	9.04413	0.741367	EC:3.1.26.4	GO:0004523
g_29	BP_ARGOT	5.25948	0.637695	15074	DNA integration
g_29	BP_ARGOT	0.410473	0.397727	9987	cellular process
g_29	BP_ARGOT	0.081324	0.346107	6508	proteolysis
g_29	MF_ARGOT	2.4298	0.531035	46872	metal ion binding
g_29	MF_ARGOT	2.12465	0.516346	3676	nucleic acid binding
g_29	MF_ARGOT	0.147815	0.360525	4190	aspartic-type endopeptidase activity
g_29	EC_ARGOT	0.147815	0.360525	EC:3.4.23.- EC:3.4.23.1 EC:3.4.23.15 EC:3.4.23.20 EC:3.4.23.25 EC:3.4.23.32 EC:3.4.23.34 EC:3.4.23.35 EC:3.4.23.36 EC:3.4.23.4 EC:3.4.23.43 EC:3.4.23.49 EC:3.4.23.5	GO:0004190
g_30	original_DE	euk	n.d.	-16.25	g_30
g_30	qseq	n.d.	n.d.	n.d.	MDWPEGKKFGTSPGEEVSRAKEAPPYNELPENEKKYALFTDGSCRIVGKHRRWKAAVWSPTRQVAEAAEGEGESSYFGVDFAKSLHPTRHRTGPDQPVNRX
g_30	DE	0.59176	0.105089	0.575	RNase H type-1 domain-containing protein
g_30	MF_ARGOT	9.1464	0.743829	4523	RNA-DNA hybrid ribonuclease activity
g_30	EC_ARGOT	9.1464	0.743829	EC:3.1.26.4	GO:0004523
g_30	MF_ARGOT	2.14868	0.51754	3676	nucleic acid binding
g_31	original_DE	euk	n.d.	-16.25	g_31
g_31	qseq	n.d.	n.d.	n.d.	MHVPNYSLIVSPLYQVTRKKNDFVWGPEQQQAFEQIKQEIACAVAVGPVWTGEDAKNILYTAAGEKGPTWSLWQRASGETRGRPLGFWSQAYRGSEECYAPTEKEILATYEGVQAASEVVGTEALFLLAPHLPVLNWMFKGKVPSTHHVTEATWSKWIALITQX
g_31	DE	0.748402	0.386841	0.706522	Reverse transcriptase/retrotransposon-derived protein RNase H-like domain-containing protein
g_32	original_DE	euk	n.d.	-16.25	g_32
g_32	qseq	n.d.	n.d.	n.d.	MPSSHEGTESIHISAVTGGSQEFTVLEAEISLTGNDWQKHPIVIGPGAPCILGIDYLRRGHFKDPKWYRWAFGIAAVDTEVVKQLSVLPGLSEDPSVVGLLRVKKQQVTIATKTVHRQQYLTNRDSLLPIHKLIRQLESQGVISKTHSPFNNPIWPVRKASGEWLLTVDYRGLNEVTPPLSAAVPDMLELQYKLESKAAKWYATTDIAKAFISIPLATECRPQFALIWRGVRYTWNRLHQGWKHSPTICHGLIQTVLEQGGAPEHLQYIDDIVVWGDTAEEVFTKGEQIIQILLRAGFAIKRSKVKGPAQEIQFLGIKWQDGRRHIPADVIDKITAMSPPTSKKETQSFLGVVGFWRMHVPNYSLIVSPLYQVTRKKNDFTWGPEQQQAFEQIKQEIAR…
g_32	DE	0.901843	0.461667	0.785714	ribonuclease H
g_32	MF_ARGOT	9.05358	0.741595	4523	RNA-DNA hybrid ribonuclease activity
g_32	EC_ARGOT	9.05358	0.741595	EC:3.1.26.4	GO:0004523
g_32	BP_ARGOT	5.19151	0.635537	15074	DNA integration
g_32	CC_ARGOT	0.0163854	0.323286	16020	membrane
g_32	BP_ARGOT	0.403174	0.396896	9987	cellular process
g_32	MF_ARGOT	2.34933	0.527256	46872	metal ion binding
g_32	MF_ARGOT	2.12688	0.516457	3676	nucleic acid binding
g_33	original_DE	euk	n.d.	-16.25	g_33
g_33	qseq	n.d.	n.d.	n.d.	MVGSLFTSLTPRPFTPRPAAVPPRALPVQPHRRHFARRTVAPRRRRPQAVEGRSGRGRRGAARPRAATRAPSRSAGTASPLGAGSGPSARALGGSSPGTVGVTEARGPTTARGSGDGSGDGAPGGAVPSAPRRFPSAEPPRAGEDEESEEEEREGLAESSVLNELLHPSLVENSHPVEVLQQDPSSPLFSIGTSEQLQLX
g_34	original_DE	euk	n.d.	-16.25	g_34
g_34	qseq	n.d.	n.d.	n.d.	MGLDRPSKSQANALPILMAHPLQNLMAQSQSGTGKPAAFVPAMLSRVKGAERYPQCLCLAPTYELALQIGHVAEKMGRFCNAIKVTYAVPGNGGTVLQEQIAFGTPGTVLDWCFKRRLLNMRRICTFVLDEADVMIDTQGFSSQSIRIQRGVMEICTWRGKMQKERGRRALPKDCQMLLFSATFKEALWKFALQIVSRPIIIKLRQEELTLTNIRRSSLVCRNWEQKYEALSNLYGSITIGQVMIFCQTLRSADWLLVEMLQDGQQVAMLTAELSIVQRADVIQRFRDGKEKVLITTKVCERSAQKQTHX
g_34	DE	0.62157	0.173504	0.75	RNA helicase
g_34	MF_ARGOT	8.55699	0.729444	3724	RNA helicase activity
g_34	EC_ARGOT	8.55699	0.729444	EC:3.6.4.13	GO:0003724
g_34	MF_ARGOT	3.04728	0.558168	5524	ATP binding
g_34	MF_ARGOT	2.25015	0.522507	16787	hydrolase activity
g_34	EC_ARGOT	2.25015	0.522507	EC:3.-.-.-	GO:0016787
g_34	MF_ARGOT	2.16215	0.518206	3676	nucleic acid binding
g_35	original_DE	euk	n.d.	-16.25	g_35
g_35	qseq	n.d.	n.d.	n.d.	MHCRDDTGPSPRTAGRWLQAPHSLREVWRHTPASMDGAWVGTWRPHRPRGLISAQFPSPGPQYSIPGTTGYVGHSPTKHRAPAYTFRGTKPPAAESCGPGPCYFVEPAVTRNGKYVAPGTQLRGRPTTKSTVTPGPGDYCTEAANRHIFKCPPVQSMAFRREPRQTDRPPGPGTYTLPRLMGPNTAYTAASPCYSMRGRSQRGRFDEDLAKTPGPAALPKVAVDAYKTRAPAYTMAARPKPGEGKAVKPGPADYSVGRVTLIKPQAPASTFGIRHSLYTTPLIVEX
g_35	DE	1.31619	0.637975	0.852941	Outer dense fiber of sperm tails 3
g_35	CC_ARGOT	5.80758	0.654616	5856	cytoskeleton
g_35	CC_ARGOT	0.913993	0.443516	36126	sperm flagellum
g_35	CC_ARGOT	0.519072	0.409312	99512	supramolecular fiber
g_36	original_DE	bac	n.d.	-16.25	g_36
g_36	qseq	n.d.	n.d.	n.d.	XFLFLFFLFSCLPFLFLFFLFPCLPFLFLFFLFSGLPAPHAASSSFGSRSX
g_37	original_DE	bac	n.d.	-16.25	g_37
g_37	qseq	n.d.	n.d.	n.d.	MLCWQPVWGDRPVSGVRVKVPRTGREGASLGRRDGGCPGSRLLWPLLFVCPAPFAQSARLRDPLQRRLEPPQRASE
g_38	original_DE	euk	n.d.	-16.25	g_38
g_38	qseq	n.d.	n.d.	n.d.	MWWGFGGGLRGETRAGRSGASDGVPGREGGAGRSGASDGVPGREGGAGRSGASDGVPGREGGAGRSGASDGVPGREGGAGRSGASDAVPGREGGAGRSGASDGVPGRGGGGPAGAGPPTACRGGGGGPAGAGPPTACRVGGGGRPERGLRRRAGAGGGGRPERGLRRRAGAGGGAGRSGASDGVPGREGGAGRSGASDGVPGREGGAGRSGASDGVPGREGGAGRSGASDGVPGREGGAGRSGASDGVPGREGGAGRSGASDGVPGWGGGRPERGLRRRAGGGAGPRMAQSX
g_39	original_DE	bac	n.d.	-16.25	g_39
g_39	qseq	n.d.	n.d.	n.d.	MIDFECCSWGGENHTNRSRLGTGLLEARPEKDSAVPVKKDRKLVERAQRRAANMMRDLALLPSEEQARRFPPRRRFMELFPQVQGRSEVSFVFLSPACTGCPREGVCGRGLAPGDDSPFRLGMEVRGTAGPSPEARLHLFFPFSPEGARRTLSWRNGVDGARGDECGKLSLCWWSGSSSLFVQEFGVLTSFPAVGWSNTPELFFVFRWCSKKKVSVVGX
g_40	original_DE	euk	n.d.	-16.25	g_40
g_40	qseq	n.d.	n.d.	n.d.	MITSSEARRRWITQHPRNHRQLGLPALPLGQLLEELRRYSGSVSRDRALPGTPGHSAPAVTPQASRGGPGDATRDPSPRVARGGAIPKPLPAEGPTCAPLAERHTAVVPRKAQPRPRSPPPSPGTQPAPPAAPCTGRRRRPPCRGCSPPPPSQPARLWGSPRAPGVGGTRAPHPRQRSSTDTAPSLLRSYLPRYRASWRWRGGPELLPHRHSDADQRNKPNTGTALPADX
g_41	original_DE	euk	n.d.	-16.25	g_41
g_41	qseq	n.d.	n.d.	n.d.	MAAKQPPPLMKKHSQTDLVSRLKTRKILGVGGEDDDGEVHRSKISQVLGNEIKFAVREPLGLRVWQLVSAIMFSGVAIMALAFPDQLYDAIFNEESVSSKTPIRLYGGALLSISLIMWNALYTAEKVIIRWTLLTEACYFAVQFLVTTVSLVESSRMATGAVLLLVSRVFFVLISIYYYYQVGRRPKKVX
g_41	DE	2.34213	0.91279	0.605263	Tumor protein p53-inducible protein 11
g_41	GN	n.d.	n.d.	n.d.	TRP53I11
g_41	CC_ARGOT	0.921528	0.444087	16020	membrane
g_42	original_DE	bac	n.d.	-16.25	g_42
g_42	qseq	n.d.	n.d.	n.d.	MLNAGTAEPPLGASSPGIPPSPRLPSHLPAPRALRSRYPGGHRRSPGKAGGTPQSEPEPEPQPLTYRQQRQQLPRTGRAGAGGRLSATAPRSRCRTHPVPGATERPSRQRSRLHLRPCPALRPRAGPAAWPRPGPPRAPVPGPVSCGGASRSRVRRTESGMGGLRTWDSLSAPEMRAEICQRHVKVAPRHPWQTFQKHTARQRQPVFVTQESRPFKPGFLRKSGSAVVLCVRASNFRAWX
g_43	original_DE	bac	n.d.	-16.25	g_43
g_43	qseq	n.d.	n.d.	n.d.	MTATVASHPPRRNQSGWNTAVDSGAAHVPRGTAGHAQPPEAAFSRKDDLTEPHAGLRDTAAPQRRLSGRRRLTPTSRPLPHLX
g_44	original_DE	bac	n.d.	-16.25	g_44
g_44	qseq	n.d.	n.d.	n.d.	MKPPAARGVPGTAPGTPPASAGRGARRPRTARRHRPRPAESPRAVPGASTQPRTSTHRLRTAAPGEPSPIRERSPHTEASTPSSRSRSASTYLPAVLGAPLVPSAAIPLSCRPDCGAEPAVAFSQLSGRDPPPPGGPSGCPAPDLCGPYLGLFGIQX
g_45	original_DE	bac	n.d.	-16.25	g_45
g_45	qseq	n.d.	n.d.	n.d.	MSSLPCARNKEAAEEGVPSARQPAALGAPVSAAPPDLSEPGRAGTTRGGGGDGRRGRAREKCRRAAGRELSLGPGDAAYHPHPSTGSSRCPLRGGRKGLPERRAGEESPGFGEILLAAVLPRSGPRLRPLGRQSRSRLPRPAARTSISLPGRSQKIRRSSCNLRVATENHPENKHDGSPANKX
g_46	original_DE	bac	n.d.	-16.25	g_46
g_46	qseq	n.d.	n.d.	n.d.	MPSQLTGIGARQHALAQRCGRAGLPPNGAVVPGRPPEPRRGSLRDFPGGGWKSGGARSGLLPTRAAAPAGTAACGRPLAYAEVVELQEMDWDRFRGGRGAASTHCRLPLALRLTASGARFCPQRKX
g_47	original_DE	euk	n.d.	-16.25	g_47
g_47	qseq	n.d.	n.d.	n.d.	MNADTCVSYCDPAAMDSYYNAASQGADGSSPFRAFQASDKFGPAFLAAKGQSFGDSGAKCRSRYSPQECPSLDGSGQAPGPAAPPPAFSKYPQPQQQPPHLYMQRGPCKTPPESNLKLQESGGHNGALQVSCYAARRGRASAEPQARSSRVSRGLSGARCARAAPRLRDAPCPVPADATTVAPLTRSSLSRPQAGRCRAPASGLVPSDPLPPRCAQGGRYLGVRGAPPPPCRLLPRGRREAGGERGSCPHPGGREGWGGAAPAPRYKGMPSGRAARRQQSGEGGRNPGEEKGERPRRRSPSLDRVNRSATQGEEGAPAGSRAEALGGAAPPPQELRNPLGQRHAKVGPRSPLALERARX
g_48	original_DE	euk	n.d.	-16.25	g_48
g_48	qseq	n.d.	n.d.	n.d.	MVLQHLLSKESSLGEADLQPNADPSGMDSSYLSVKEAGVKVPQDRASTDLPSPMDKADSESNKGKKRRNRTTFTSYQLEELEKVFQKTHYPDVYAREQLAMRTDLTEARVQVWFQNRRAKWRKRERFGQMQQVRTHFSTAYELPLLTRAENYAQIQNPSWIGNNGAASPVPACVVPCEPVPSCMSPHAHPHAAGGVSDFLGVSSAGGHVGQTHVGGLFGTAGIGPGLNGYELNSEPDRKSSSIAALRMKAKEHSAAISWATX
g_48	DE	3.96702	0.968076	0.4	Homeobox protein aristaless-like 4 (Fragment)
g_48	GN	n.d.	n.d.	n.d.	ALX4
g_48	MF_ARGOT	10.7309	0.780347	1228	DNA-binding transcription activator activity, RNA polymerase II-specific
g_48	BP_ARGOT	7.90767	0.713011	45944	positive regulation of transcription by RNA polymerase II
g_48	CC_ARGOT	3.47393	0.575331	5634	nucleus
g_48	MF_ARGOT	7.28351	0.696565	977	RNA polymerase II transcription regulatory region sequence-specific DNA binding
g_48	CC_ARGOT	0.247372	0.376917	5667	transcription regulator complex
g_48	CC_ARGOT	0.172111	0.364938	70013	intracellular organelle lumen
g_48	MF_ARGOT	0.56019	0.413376	71837	HMG box domain binding
g_48	BP_ARGOT	0.507158	0.408104	35116	embryonic hindlimb morphogenesis
g_48	BP_ARGOT	0.505733	0.407959	35115	embryonic forelimb morphogenesis
g_48	BP_ARGOT	0.477056	0.404989	42733	embryonic digit morphogenesis
g_48	BP_ARGOT	0.46034	0.403216	60021	roof of mouth development
g_48	BP_ARGOT	0.416776	0.398439	48565	digestive tract development
g_48	BP_ARGOT	0.404104	0.397002	48704	embryonic skeletal system morphogenesis
g_48	BP_ARGOT	0.357472	0.391514	9952	anterior/posterior pattern specification
g_48	BP_ARGOT	0.356086	0.391345	7517	muscle organ development
g_48	BP_ARGOT	0.320949	0.386959	9791	post-embryonic development
g_48	BP_ARGOT	0.271036	0.380293	42981	regulation of apoptotic process
g_49	original_DE	euk	n.d.	-16.25	g_49
g_49	qseq	n.d.	n.d.	n.d.	MDFRGKKYERGSNWSDPEVVELLQLWADESVQLELESCLRNQHVFNRIAEVLREKGIHRTGDQCREKIKKMKLEYRRIKDNSKAPRGGRTWKFYDVMDRVLNSRPTLAYGPMGGGVMATQVLPGGVVEGYHHFTAPALPFGHSQHPELMEIKCEEVNSDEHCLTPEPPAAMSYQQGCPEEHEMERAFLERAQNDSPISRVEIPIETSVSPSGFSEPSMANSSCMQNVVPRPGFSALHRLRKKRKGQRVKDPLDDLLLKTLTSQRAMEERFLQMEERRFQRDLDVEERRMQLEQRRFELEREHEFRMFNVFAQMLSILKQSHGGASPSLAMPRGLDFSQTLSELTGRVGGGDQRGPRARGLAGSRVDKCGFCPPEGFRRSPYLSARGNVANVFRGSDEEG…
g_49	DE	0.592324	0.106383	0.654545	1-aminocyclopropane-1-carboxylate synthase 1 isoform X1
g_49	MF_ARGOT	7.0163	0.68931	8483	transaminase activity
g_49	EC_ARGOT	7.0163	0.68931	EC:2.6.1.-	GO:0008483
g_49	BP_ARGOT	3.98127	0.594419	6520	amino acid metabolic process
g_49	CC_ARGOT	0.920423	0.444003	16020	membrane
g_49	BP_ARGOT	1.48268	0.481503	9058	biosynthetic process
g_49	MF_ARGOT	6.52953	0.675729	30170	pyridoxal phosphate binding
g_49	BP_ARGOT	0.409977	0.397671	9987	cellular process
g_50	original_DE	euk	n.d.	-16.25	g_50
g_50	qseq	n.d.	n.d.	n.d.	MRAALFRDNFSPCQSLAAFPSGAGLSAEARSLSPTPALLPQAQPGPPRPYPAGRGCARSDRAEPCRARAAPPRGGARSLSPARRPALVAPPGRARHGSARPLRESTERSLLLQKETRRTSRGAAERSQKEPCLCPGSGTSRAVCVGALQSTELRTAQRTRAAPGRALGAQGAAAAPRRALQGVLQPRSAKPHPARRDRSSPTVPAAAVNAGLSGAPRTACCGCVSGQRASDRNHDNHRGSLKX
g_51	original_DE	euk	n.d.	-16.25	g_51
g_51	qseq	n.d.	n.d.	n.d.	MAAKPAELLGVCSSYQAVMPHFVCVAEEFPPPARPARPARGKARRPRQSRFKTQPVTFDEIQEVEEEGVSPMEEEKAKKSFLQSLECLRRSTQNLSLQRDRLGSCRLRNSLDSSDSDSALX
g_51	DE	1.40781	0.671886	0.8125	Prepronociceptin
g_51	CC_ARGOT	3.3407	0.570091	5840	ribosome
g_52	original_DE	euk	n.d.	-16.25	g_52
g_52	qseq	n.d.	n.d.	n.d.	MGTWHPVLTMLKEHIEEFTGHTFNSLLCNLYRNEKDSVDWHSDDEPSLGTNPVIASLSFGATRTFEMRKKPSAEENGDYTYVEKLRIPLDHGTLLMMEGATQEDWQHRVPKEYHSRDARINLTFRIIYPEPDRVWKX
g_52	DE	6.92927	0.968076	0.701493	Alpha-ketoglutarate-dependent dioxygenase alkB homolog 3 (Fragment)
g_52	GN	n.d.	n.d.	n.d.	ALKBH3
g_52	BP_ARGOT	10.7417	0.780586	6307	DNA alkylation repair
g_52	MF_ARGOT	7.50214	0.702403	51213	dioxygenase activity
g_52	CC_ARGOT	6.88819	0.685783	5654	nucleoplasm
g_52	CC_ARGOT	4.50226	0.612793	5739	mitochondrion
g_53	original_DE	euk	n.d.	-16.25	g_53
g_53	qseq	n.d.	n.d.	n.d.	MSQALTEPFFGLRKNGALPKSGSGAWHRDIQRGRHPRLCPPAPAAAAPPCLPAAPPHRRPSRPARGPAASSPPWRGRPDTAPPPRAPPRAAPPPGRELSRVAELLSPSGGCGSARRGRPGTX
g_54	original_DE	euk	n.d.	-16.25	g_54
g_54	qseq	n.d.	n.d.	n.d.	MLAPASLPAAGLFYWVGAFCALYAAVLGAFRLLSGLRVWVLGGGRAVGPQLGAWAALLSGGSGGLRVSWSPTDGFLPRGPGTPSRCSGGSQTTQLRAGGTCEEPARLX
g_55	original_DE	euk	n.d.	-16.25	g_55
g_55	qseq	n.d.	n.d.	n.d.	MAAASALPGPGPLCGERRGYAPAAGSARLGTGQAWPPRRAASVLSAPDELGRGLRAAGPAGRREDGSAKLAGLGSRDVWSEDELSFFGFDSLCAQRPIDVPHSGPRGPNLARGSARIAPRPRSGQRSAGNASCSAPKNDPCPKGARWGLEKDAVRGRLGGETLRAAERGRPPPGAEAARGRTEGAGRAWGRAQARGGATAVYEWAHMTSGEAGGEVPLLANPAGSSDRRANRSAPAAX
g_56	original_DE	bac	n.d.	-16.25	g_56
g_56	qseq	n.d.	n.d.	n.d.	MQRKGRQSGSHRARSGPHSAAGLGAEPRAGVEPGRQRGRAGPGRSEQGRRAAPHRTGPRLQCPQGARPGLGGPARPGRKGAGSWAGEGTAAAGPPWRRRGLTRAEAAGSWELX
g_57	original_DE	bac	n.d.	-16.25	g_57
g_57	qseq	n.d.	n.d.	n.d.	MCGRTHTGTRTLPHARHRLQPAPRRQPRLSKAKPRPRHRGVHASSAPAAALRAEIPCPGNPAGTSREASPVPGAPAGGGGRGAAVRRSRGLPQDGPDGVKAEGVFSAGQGQRRAGATAAGRCAAALGNLWGRRRREGKLGRAGEAPRGAAASGAGLGAAPEQRGAATATARSSGPQHGSNSWLPRQKSIKKFGERRRRVPDCPGGPSGVERGEKGAPRRHGAAPPSGDPAAEPPLAPTGAPRAAATSRRAAGDTGIRGGRSARQRAAPGPEQPPGATLPGRGKEGRGTPPPVAPPEVASLRAPPPEGTGTASSEKFRGRCTQLRSSPLPARGERAAQRCPRVAAERRARAHAASRRAHARRREGRPAGLGGEPRTSAATQKLAARPAPQKGPASGASAC…
g_58	original_DE	bac	n.d.	-16.25	g_58
g_58	qseq	n.d.	n.d.	n.d.	MGLQPIPRAPRALPKGGREGPGAAASAVRDPRAGRRCRAEGRAGAGGYFRIALTLPPSRGSRFLPLDSLX
g_59	original_DE	bac	n.d.	-16.25	g_59
g_59	qseq	n.d.	n.d.	n.d.	MSFPRIAKGRVAGSSALLSAVKRSGSHPAERHRRVLHTELRTRSFCGSSRALPRRSARHSVPGARLPPERKSGAAPGSRPAARGEHIRKLPLASSGDALEMAQYYTDGRRDQAAAVPEGPHPSRNTCGTNTPSTGRPGPQRRPRPARPRRLSPGSGCHLQAAEGSAVPSLRQSPPSGGEGGAVKGCTPGTEWGGCGAWAAGVKVRGCGPLPSAQGNGDCSDAVKRSDVPVGAPQAARFGERPPGPX
g_60	original_DE	euk	n.d.	-16.25	g_60
g_60	qseq	n.d.	n.d.	n.d.	MAERAFPVPGGAGRPGLGKMAAAAAAASGWGGLGRAWVFSGWALGLCSLLASGTRPAAATTHWVVTEDGKIQQQVRLGAGGGREPRRWGSSCPRRPSSQPEPLLVFPQRGEQREHWGWQLPYYPLPPGRCHPPSPVSFGSGSLDAIVLPSAVPPMFADGIKLAEVRLFPIYEDIKQCWPQNX
g_61	original_DE	bac	n.d.	-16.25	g_61
g_61	qseq	n.d.	n.d.	n.d.	MPTVEELYRNYGILADATETAGQVWSGCGLQGLARPGARVVRRGAPVWAGRAAAGAPLGWGVVERPLRLRSRGGLRGLTVLDQLLRWLLFAX
g_62	original_DE	bac	n.d.	-16.25	g_62
g_62	qseq	n.d.	n.d.	n.d.	MPAGKAELPPVSPSRRERRLRHPASSVVAECRLLHGTRTGGQAREEQSALTESSGKQWYGTERVVAATGTLFPSHSTSVQARTPANAAAGTAERREVSRGVTAGPPAATQPCRGRHAGTAPAATRPLWDFRLVGADGGGLRGAAAAX
g_63	original_DE	bac	n.d.	-16.25	g_63
g_63	qseq	n.d.	n.d.	n.d.	MCEEQHGAEQEPFRTPRRRAGEALHRASRPLLRIAAVARWSVRDGVCALPPTVVRVPAANGLSRSRPRENPEHEGQNRRISVREDX
g_64	original_DE	bac	n.d.	-16.25	g_64
g_64	qseq	n.d.	n.d.	n.d.	MFQATQSYVRSHQTHFDVFQKLGSSSLGRGQPEPYWEKPGPDPASPLLPLGALPGRGAHCGVTLTDPSAAAGLTPSLCNRFPTLPATPRLRAPSSKRRNLQHQNYNSLQGLSATAVAAKPGRARSFSPTCRPRDHPTHGTPRSSRPPRAFPTVATRQRPPFFKHPHETLHAPFGGAARAARFEPLX
g_65	original_DE	bac	n.d.	-16.25	g_65
g_65	qseq	n.d.	n.d.	n.d.	MWLWADWSSVPHAVQFKEAGPTSRAGREAQPSTAGPLCYVLPPPLPALQAPRKPALGGGSARCRQRSEKPRPFWPHSPPADPVAPGAASETSLVEPPKENYRPQQAPGPAFPWEPWARCVAFTALLEWKQX
g_66	original_DE	euk	n.d.	-16.25	g_66
g_66	qseq	n.d.	n.d.	n.d.	MTKGQTSGARPSRPRETNTQNSAPPRTCRPSGPGPAPSCALPRHGAHFQFRRSSARRALATEPPSFSTATPTGEARVTERALAEGQPNSRRHTTPGAPSRRPRAPRSHTTLPAFHSEMQPRRAARHPRRPRSAVISAPAASPHSPPAAPAAPRRAPLPPSPRDEPGRRPPGPKPATAPPAGPVGPPAX
g_67	original_DE	euk	n.d.	-16.25	g_67
g_67	qseq	n.d.	n.d.	n.d.	MSLLHSDSSCGARDMDGGCCAAMASTCSGGAKEDSVSVGSGTGNLPSSFTEETQGYDVEFDPPLESKYECPICLMALREAVQTPCGHRFCKGCIVKSIRX
g_68	original_DE	euk	n.d.	-16.25	g_68
g_68	qseq	n.d.	n.d.	n.d.	MALTPLTEQEGEAYLEKCGSIRRHTVANAHSDIQLLAMASMMHTGMVIEESDSSDKCLLLQPSFSHRQCSSEPSIADGPEGGMATGRQDSAELNCTSVSX
g_69	original_DE	euk	n.d.	-16.25	g_69
g_69	qseq	n.d.	n.d.	n.d.	MLELQYELESKAAKWYATIDIANAFFSIPLATECRPQFAFTWRGIQYTWNRLPQGWKHSPTICHGLIQTVLEQGGAPEHLQYIDDIIVWGDTAEEVFKKGEQIIQILLQAGFAIKRSKVKGPAQEIQFLGIKWQDGRRHIPADVIDKITAMSPPTSKKETQSFLGIVGFWRMHVPNYSLIVSPLYQVTRKKNDFTWGPEQQQAFEQIKQEIARAVALGPVRMGQDVKNILYTAAGEKGPTWSLWQRASGETRGRPLGFWSRAYKGSEECYTPTEKEILAAYEGVRAASEVVGTETQLLLAPRLSVLNWMFKGKVPSTHHATDATWSKWIALITQQAQRGNLSCPGILEVIMDWPEGKKFGTSPGEELSHAKEAPPYNELPENEKKFALFTDGSCRIEGK…
g_69	DE	0.818169	0.421502	0.785714	ribonuclease H
g_69	MF_ARGOT	9.21705	0.745521	4523	RNA-DNA hybrid ribonuclease activity
g_69	EC_ARGOT	9.21705	0.745521	EC:3.1.26.4	GO:0004523
g_69	BP_ARGOT	3.98523	0.594563	6259	DNA metabolic process
g_69	BP_ARGOT	0.410454	0.397725	9987	cellular process
g_69	MF_ARGOT	2.47625	0.533188	46872	metal ion binding
g_69	MF_ARGOT	2.16528	0.51836	3676	nucleic acid binding
g_70	original_DE	bac	n.d.	-16.25	g_70
g_70	qseq	n.d.	n.d.	n.d.	MSGQGGASRENASGITAGRGEKGTRLHRAALSGQPAACGFCLLSQRLHVNSAQPRAFRGPPRAHPRGRTSRTSPTVRRRSPLHGSPARLSPRTHRRRSAGRAAANAAAPRPLLRSSLSSAPTVAPPRAEGRAASGRDLAKFATTRPGFHTSWLSASPYFYNLPFAGSSQRRQRQPGRAX
g_71	original_DE	euk	n.d.	-16.25	g_71
g_71	qseq	n.d.	n.d.	n.d.	MAAAVREEDFVALQTLLKAPSKDAVRQLCQECFSCPPGRLSPLAQRACPAIAASPEEAAQLVSALHSLTRHVVFRGLTGAEDILALFPENFHQNLKNLLTKIILENVSAWRNEAQANQISLPRLVDMDWRVDIKTSSDTINRMAVPTCLLQLKEMASLVSSRIAGPAGRAAVLHSDFSEAGSPQQPRQPFTRAAKQGSVLYLKDTDNLERFKTGPSQTTQRSVVKWQX
g_71	DE	0.984731	0.499943	0.791667	COMM domain containing 9
g_71	GN	n.d.	n.d.	n.d.	COMMD9
g_71	BP_ARGOT	12.676	0.82166	42632	cholesterol homeostasis
g_71	CC_ARGOT	6.88062	0.685573	5654	nucleoplasm
g_71	CC_ARGOT	6.47034	0.674043	5794	Golgi apparatus
g_71	CC_ARGOT	3.61191	0.580653	5829	cytosol
g_72	original_DE	euk	n.d.	-16.25	g_72
g_72	qseq	n.d.	n.d.	n.d.	MWFPALALTLKCGSHIEAGSGQDYVTSENQLLYYPSITYAIIGSSVIFVLVVAFLALVLHHQRKRNNLMALPVHRLQHPVLLSRLVVLDHPHHCSVTYNVNNGIQYMSNQTYHRPVDLDSPPSYSEAVLDQSRPPWFDLPPPPYCSESESPNQPDLPPYRSRTGSMVSTDTPTAGSPLGTDSSWTRDVHESMDGHRTLLERTADPSDSLVNQADGREVX
g_72	DE	2.69979	0.954433	0.78481	Low-density lipoprotein receptor class A domain-containing protein 3 (Fragment)
g_72	GN	n.d.	n.d.	n.d.	LDLRAD3
g_72	BP_ARGOT	4.5806	0.615462	6898	receptor-mediated endocytosis
g_72	CC_ARGOT	1.39352	0.476105	5886	plasma membrane
g_73	original_DE	euk	n.d.	-16.25	g_73
g_73	qseq	n.d.	n.d.	n.d.	MPELRKGSAARSPRPPPAARGGEARGPRALRGASSSPRPRGRRGRARPAGGGLGRARGVRRGGAAAGTAPGPPPPPRPPPRPQAPPSGPGRRSSPEVCGAAGAEAMWLLWLLLGSAGECGRGPSRGAARRRGGVLGAAGEGAGPHVRPRLPAAPGGPGRGPPASPPLLSPPLRFPTSGRAEVAGAARDGGVRPCRPPLGAGSGWGRPAGGRGGAVPGGGRGAARERPWAPPSCPTSSGVLGGLRRX
g_74	original_DE	bac	n.d.	-16.25	g_74
g_74	qseq	n.d.	n.d.	n.d.	MNRRESLAPETPRTEWRGCVVPSCIPLVAYPPPHGCPRGRQRVLNARGRWQGEVCGAACGIAALRLREAGEAPCRPRTAQAGSERPPCSRSGRGCRLHSCCAGRRAAGVTASPFCHRLTLFSPRSVQNLPGLFSYLILCREALTEHNX
g_75	original_DE	euk	n.d.	-16.25	g_75
g_75	qseq	n.d.	n.d.	n.d.	MERGGRAALALGLLLLLLLGALLALREPAPGPARDEARGGGVQKTFRALLAAGREQQQQEEGEEDPPAAPVRRGIFWSRELEARVPPGFAAEEAAAWRAAARGARVASLERGGCGRSSNRLARLSDGSRACVRYGVSPEQIQGEALSYHLAGLLGMQQRLPPMALALVEARGRQWEPVREELRGSHWAEGAVVSLTRWVDNLTAVVAPAPWGGGRPRALAAGELGGLPAAQLVELVQWSDLILFDYLTANFDRLASNLFSLQWDPRVMRRATSNLLRAPDGGLVFMDNEAGLVHGYRLLATWDPYNEPLLRSVCVFREGTARRLAELHRRRNAAAELRRRYRAREPLWARLGFLSERQAELLQARVDFVHRHIAQCRAQAAALX
g_75	DE	2.33103	0.911049	0.8	Four-jointed box kinase 1
g_75	GN	n.d.	n.d.	n.d.	FJX1
g_75	BP_ARGOT	8.45897	0.727004	7267	cell-cell signaling
g_75	CC_ARGOT	6.84519	0.684591	5615	extracellular space
g_75	BP_ARGOT	1.11245	0.457846	10842	retina layer formation
g_76	original_DE	euk	n.d.	-16.25	g_76
g_76	qseq	n.d.	n.d.	n.d.	MGKCRPRWMSDRSGSGTAASSPSLSLQAVTGGSVTGSAVAPLAGQRGDSPQGHWGHVAGPPRRERCGCSEASRPAGGAGAPRRELGLAVSGMGAGRQAGIPRGGPVPAHAGQPQPERRGARGGRSRSEPELRRVGPPPX
g_77	original_DE	euk	n.d.	-16.25	g_77
g_77	qseq	n.d.	n.d.	n.d.	MERAPWTHIGLTLLQLLLISCLPREYTVINENCPGAEWNIMCRECCEYDQIECVCPGRKEKVGYTIPCCRNEENECDSCLIHPGCTIFENCKSCRNGSWGGTLDDFYIKGIYCAECRAGWYGGDCMTHSYVEFGLEGCQQLPGNDSMGAAGADVLTCHILETGGGGISLVFTSSYQPGPRFPCPSAEDKPPPAFASHDFAFSSPALKAVTHGRAGLPARISPTPGSRQCPGRPSPAARPSASPSRCRAASAPASCSALGSECSALGRSVRTAGNGWAPQYAGAPLALSPRYPKASRTVPGEAAELAGKALQGPLPAAPPAISPQAAPGRFAAVPRCGRLVAPGAPQEHGTARASSPGAAAGGGGRQRGAFCVGWARWWEHGHRPEGAVVEADPGNWQLCX
g_78	original_DE	euk	n.d.	-16.25	g_78
g_78	qseq	n.d.	n.d.	n.d.	MQVQSRETPLHQLYSSAFSKQKLEIYPTKKPALPFGDLPPGYQHLHTQLQYECISPFYRRLGSSRRTCLKTGKWSGRAPVCIPICGKAENITLQKAVTSTRWPWQAAIYRTANGVKENSLKKGAWILICSGALVNERTVVVAAHCVTDLGKTIVLKTAELKVVLGKFYRDDDRDEKTIQNLRISAIIVHPNYDPILLDSDIAIIKLLDKARISSRVQPICLASSHDLTSSTEDLKIMVTGWKVLADIKDPGYKNDTIRMGVVQMVDSLLCEQQYEDNGIQVSITDSMFCAKQDHTAFSNICPAETGGIAAITLPGKASPELRWHLMGLVSWGYDKTCSLELYSGYTKAIPFKDWIEKNLKX
g_78	DE	1.95905	0.837128	0.923077	Peptidase domain containing associated with muscle regeneration 1
g_78	GN	n.d.	n.d.	n.d.	PAMR1
g_78	MF_ARGOT	6.98459	0.68844	4252	serine-type endopeptidase activity
g_78	EC_ARGOT	6.98459	0.68844	EC:3.4.21.- EC:3.4.21.1 EC:3.4.21.10 EC:3.4.21.102 EC:3.4.21.20 EC:3.4.21.21 EC:3.4.21.22 EC:3.4.21.26 EC:3.4.21.27 EC:3.4.21.34 EC:3.4.21.35 EC:3.4.21.36 EC:3.4.21.38 EC:3.4.21.39 EC:3.4.21.4 EC:3.4.21.41 EC:3.4.21.42 EC:3.4.21.43 EC:3.4.21.45 EC:3.4.21.46 EC:3.4.21.47 EC:3.4.21.48 EC:3.4.21.5 EC:3.4.21.53 EC:3.4.21.54 EC:3.4.21.59 EC:3.4.21.6 EC:3.4.21.61 EC:3.4.21.62 EC:3.4.21.68 EC:3.4.21.69 …	GO:0004252
g_78	CC_ARGOT	5.39845	0.642066	5576	extracellular region
g_78	BP_ARGOT	4.32376	0.606624	6508	proteolysis
g_78	BP_ARGOT	0.410468	0.397726	9987	cellular process
g_78	MF_ARGOT	2.83918	0.54936	5509	calcium ion binding
g_79	original_DE	euk	n.d.	-16.25	g_79
g_79	qseq	n.d.	n.d.	n.d.	MRDHPRPRPSLRTGAPLTLPSTPWSREPPCLLGSPGSGAERQRLRGCPSLASGKRRAVPSNPRGRARRGPAAPLGASRPATATSRPPSAPAGPGGARSRWHRCGPAGRLSPRGDRKERGGGSEPLAGGGPPAAAHYLPRSARRCAALRCSGTRRQGPPGPPGRSGPGRAGLPPAASRSPLARHRGPAAAPRAQCLSAAPRPRASPPSNPPGPSGSRSRPPGDARRAPGARPGGVAVLPPDGQAAAAQPHLHGRPRGAPAVLCAALGX
g_80	original_DE	euk	n.d.	-16.25	g_80
g_80	qseq	n.d.	n.d.	n.d.	MPSSHQGTKSIYIHGVTGGSQELTMLEAEISLTGKDWQKHPIVTGPGAPCILGIDYLRMGYFKDPKGYRWAFGIAAVDTEGVKQLSVLPGLSEDPSVVGLLRVKEQQVPIATKTVHRRQYRTNRDSLLPIHELIRQLESQGVISKTHSPFNSPIWPVRKASGEWRLTVDYRGLNEVTPPLSAAVPDMLELQYELESKAAKWYATIDIANAFFSIPLATECRPQFAFTWRGIQYTWNRLPQGWKHSPTICHGLIQTVLEQGSAPEHLQYIDDIIVWGNTAREVFEKGEEIIQILLRAGFAIKRSKVKGPAREIQFLGIKWQDGRRYIPMDVINKITAMSPPTNKKETQSFLGIVGFWRMHVPNYSLIVSPLYQVTRKKNDFAWGPEQQQAFEQIKQEIAR…
g_80	DE	0.88933	0.455758	0.785714	ribonuclease H
g_80	MF_ARGOT	9.21749	0.745532	4523	RNA-DNA hybrid ribonuclease activity
g_80	EC_ARGOT	9.21749	0.745532	EC:3.1.26.4	GO:0004523
g_80	BP_ARGOT	5.13116	0.633608	15074	DNA integration
g_80	BP_ARGOT	0.410473	0.397727	9987	cellular process
g_80	MF_ARGOT	2.39693	0.529499	46872	metal ion binding
g_80	MF_ARGOT	2.16538	0.518365	3676	nucleic acid binding
g_81	original_DE	bac	n.d.	-16.25	g_81
g_81	qseq	n.d.	n.d.	n.d.	MSVAPVRGRKTKRISTQLEQKKEEEGKVEEADTVRGPEEWLQDPGEAPLSPGEGPSIRPQSPTPRRVRSPERQGAEQDIVTIVDRSLKMNEIRGLRKDFSRHPNEPIVTWLLRCWDNGANSVWLDSREARQLGGIARDSAIDRGISTCQNGSFTLWKRMLLAVKERYPFKDDLMPEKKKWTDMEEGISYLREYAVVEMLHSPTFIPDEPDQEHDPERVRCTPNMWRTFTKTAPERHASTFAAMYGRGERRPVINDLVNKLQDYELHLTPLRACVSAITKVVEKLDRMESKQEDIIDELSTMLNADGPMVVPDTSDEDQNSQNCLLEELINLVSTQPASSNISAIKRRRPPARANDNRRTTSRLALWRFLRDHGEDMEKWHDQPTPALQARVKELQDRST…
g_82	original_DE	bac	n.d.	-16.25	g_82
g_82	qseq	n.d.	n.d.	n.d.	MNIPTHRPVEPGAHSAYPHSSGPPRLPAAALPAQQQAGCSPALTQQLLGAVQEPPASPGGQGQPGAQHRPPASQQPQHPGAAAPPPGGRHLASPSLPARGCPSRCLNGKAGTPPPSRPQRDCGRSGLRPSLSGERQAGSAAARLPAAGPSARTGAMAAASGHGLELANGRDAAQVTRGRLCHGAQYGCDGSAAVAVLRPERGRLX
g_83	original_DE	bac	n.d.	-16.25	g_83
g_83	qseq	n.d.	n.d.	n.d.	MQMSCAERHQSAAPTGIVSASEIRAGRIVCKVGLWAGRRGDARTAGRAAPALSGGRRVLPRGSPRNAAPAEPREKAAFVAIAFRPRCPLLRALQSGSRCFPAFLSVPKRGSRTPGFAFPPPLLRWDQRLNGGLCGLRERGVPGAERSLCAAVYTAPTLNRAARAALGSAPQSPRQRQRGTRAPPGGSTAPRARQHRLEPPARGTERGAAPQTKDREPGGTRSLTCFQLIRSAPPASVHSAESRSQRLTRGGGRGSSPPTDVPLSHSELSLLAGLGAIGQGGEGVGAERGLVPWDGSEQGCGERLSGGSPPAESCQPAHEPLYAGRSEGEVPSARRGGCQPGAGATGTGTSLLSFGRLRWAELGLIGARQWAGGRCFRGGLAGIGCPVITAVELGENKIR…
g_84	original_DE	euk	n.d.	-16.25	g_84
g_84	qseq	n.d.	n.d.	n.d.	MAGIYSSTLKTLEDLTLDSGYGAGDSCRSLSLSSSKSNSQAFTSSQHRGNWWYYSGSMNSRNNSWDTVNTVLPEDPEVADIFSKCPRLPDLEEYPWTDEDIGRILRKAKGDGSGRPFSHEAVRRLSQLLRRALIRVSREAQRLSVMHSKCTRFEVQSAVKLIQSWALAESCVLATVRALSLYSMSAGDGLRKGKSARCGLTFSVGRFFRWMVDTRISVRIHEYAAISLTACMENLVEEIKGRVLASQSPDGGGGEISAEVLEMVINNDAELWGVLQPYEHLICGKNANDSVLCTRKVDVFTRQEWHCFLRAYQFVX
g_84	DE	1.51853	0.710415	0.87037	Ankyrin repeat and BTB/POZ domain-containing protein 2
g_84	MF_ARGOT	9.27975	0.747018	46982	protein heterodimerization activity
g_84	CC_ARGOT	3.5655	0.578874	786	nucleosome
g_84	MF_ARGOT	3.45754	0.574692	30527	structural constituent of chromatin
g_84	MF_ARGOT	1.19508	0.463432	3677	DNA binding
g_85	original_DE	euk	n.d.	-16.25	g_85
g_85	qseq	n.d.	n.d.	n.d.	MLLPPLMEWMRVAITYAEHRRSLTVDSDDIRQTARLLLPGLDCEPRQLKPECCFSSFRRLDAKAATEKFQQDLGFRMLNCGRTDLINQAIDALGADGVNTMDDQGMTPLMYACAAGDEAMVQMLIDAGANLDIPVPSTSPRYPSVHPDSRHWTALTFAVLHGHISVVQLLLDAGAHVEGSAVNSGEDNYAETPLQLASAAGNYELVSLLLSRGADPLLSMLEVNGVSSSLHEDMNCFSHSAAHGHRNVLRKLLTQPQQLKGDVLSLEEILAEGVESDTSSQGSSNEGQVKLCKTRMKALQEAMYYSAEHGYVDITMELRGLGVPWKLHVWIESLRTTFYQSRYSVVQTLLREFVTIKEEDYNEELVNEGLQLMFDILKTSKNDSINQQLASIFTHCYGS…
g_85	DE	1.61304	0.741177	0.707692	Ankyrin repeat and BTB/POZ domain-containing protein 2 (Fragment)
g_85	GN	n.d.	n.d.	n.d.	ABTB2
g_86	original_DE	euk	n.d.	-16.25	g_86
g_86	qseq	n.d.	n.d.	n.d.	MQRRKVDNRIRVLIENGVAERQRGLFVVVGDRGKDQVVILHHMLSKATVKARPSVLWCYKKELGFSSHRKKRMRQLQKKIKSGTLNIKDDDPFELFIAATNIRYCYYNETHKILGNTFGMCVLQDFEALTPNLLARTVETVEGGGIVVILLRTMNSLKQLYTMSMDVHSRYRTEAHQDVVGRFNERFILSLASCKNCIVIDDQLNILPISSHVANITPVPPQSQVSKQX
g_86	DE	0.59	0.10105	0.468085	TmcA/NAT10 N-terminal domain-containing protein
g_86	MF_ARGOT	15.4644	0.85356	1990883	rRNA cytidine N-acetyltransferase activity
g_86	BP_ARGOT	14.4002	0.847237	1990882	rRNA acetylation
g_86	CC_ARGOT	10.4048	0.773063	30686	90S preribosome
g_86	CC_ARGOT	7.07424	0.690895	5730	nucleolus
g_86	BP_ARGOT	9.55137	0.753445	30490	maturation of SSU-rRNA
g_86	MF_ARGOT	7.00868	0.689101	49	tRNA binding
g_87	original_DE	bac	n.d.	-16.25	g_87
g_87	qseq	n.d.	n.d.	n.d.	MRGAQLRPVATSGVVLPVPREALTLRSSSAKPRPPSSSTAPHPARAASTSTPFEQPARPAASPSAERRCRPALRELPRAGDCRDSLAPGSX
g_88	original_DE	euk	n.d.	-16.25	g_88
g_88	qseq	n.d.	n.d.	n.d.	MPSATNSTMASSSSGKAGPGGNEQAPAAAAAAPQASGGSITSVQTEAMKQILGVIDKKLRNLEKKKGEVAGLSGSPLGPGQLPCAGSPYSAASGCLPGPGRVPSSPLRAGEPRPRGLFPASPPGAARWKVPEGRAALSRPFPLPLSGVPWPPPQAVPSSGSDRPQGADAALPRGAAAEGGGRGCPLRCGPRPPPGEPPVVRPPPPSAFCSPWRVSAQPFCGRAAVPGLPVALHPTGSAPPARSAGPSRGAGAPRPPEPRTWRRELTWRRRGRLSLPGGTALCQQPAQSRAAPPAAFRFTPLLPLGSPGSAESGLWAVIYRKSRCX
g_89	original_DE	bac	n.d.	-16.25	g_89
g_89	qseq	n.d.	n.d.	n.d.	MTASADSGPAPLLPPPHSATMGESESAHASARAPGASAPDTIAGRGDRREDPARRQRPWRVVGLGASVVQCGLSPAEQRAPVRECALLSSWRQYSSERALRLLEPWRHVCVPVPGTPHWASLDAFRPLKPDGSLFFRYISVAKANNCLLNLNFHANGX
g_90	original_DE	euk	n.d.	-16.25	g_90
g_90	qseq	n.d.	n.d.	n.d.	MCGRAAQNRLRDRTCGERGRSGHPGTTTAFSLGESPAAGPATRGRREAPGPELCPQPPPDGAVQHPRSGPGDPRRRGVPVAAEGRAGPASCRRWHREERRAGRKDATYSEGSRLFLSMADDIGRDGSFVACLWCDLPPLPPQRPSALDALSPAALPLRPPMTFTGFPPATPKRDTNAGWGGCRAPAAGLPAGSNLPSSPRSSCAPCGGAAPPAAALRAGGRRLPRPPLPARRCPPGRCPPLSGACPAAALSSPRGSGRVLRPGSSASLLVLRGAAPALRDRARAPRSRGCELTLRFHIATSRSSIAPLRGAPGEVRDPKASEGLRETSACSELSAPRSHAESQRVTLPLLVLSSPYTRTCPRHARFVRHLEIRGWVRTRALFSTX
g_91	original_DE	euk	n.d.	-16.25	g_91
g_91	qseq	n.d.	n.d.	n.d.	MIREPVDEVLQIPPSLLTCGGCQQNIGDRYFLKAIDQYWHEDCLSCDLCGCRLGEVGRRLYYKLGRKLCRRDYLRLFGQDGLCASCDKRIRAYEMTMRVKDKVYHLECFKCAACQKHFCVGDRYLLINSDIVCEQDIYEWTKMNGMIX
g_91	DE	2.47745	0.931838	0.545455	Rhombotin-2
g_91	GN	n.d.	n.d.	n.d.	LMO2
g_91	MF_ARGOT	11.0307	0.786946	140297	DNA-binding transcription factor binding
g_91	BP_ARGOT	7.8226	0.710809	45944	positive regulation of transcription by RNA polymerase II
g_91	CC_ARGOT	3.47388	0.575329	5634	nucleus
g_91	MF_ARGOT	9.97118	0.763201	3713	transcription coactivator activity
g_91	CC_ARGOT	1.11591	0.458084	5667	transcription regulator complex
g_91	MF_ARGOT	2.47633	0.533192	46872	metal ion binding
g_91	CC_ARGOT	0.0596681	0.340168	70013	intracellular organelle lumen
g_91	MF_ARGOT	1.88972	0.504302	1221	transcription coregulator binding
g_92	original_DE	euk	n.d.	-16.25	g_92
g_92	qseq	n.d.	n.d.	n.d.	MAAPLDMEPPALSLELLPTDPLLLILSFLDYRDLMRWGRRWRRSAGPVQRRAAGQESGGGGVRSPPRPRCPRTGWCAAPPHGRAGGGTLGRWVGRAGEGEAAGWELWGAGRAACLGRGCRWPPLHNFWVRGSLCYSKRGQEKRACGGCDRREGEAASRDTVLKNICRSAGERFGFFX
g_93	original_DE	bac	n.d.	-16.25	g_93
g_93	qseq	n.d.	n.d.	n.d.	MFPQDKPLGATPPEIPHPWLLAQPAAPRDAAILERETAPQRPGTARLGTVQLCSLAEASHGRNDKAILTPRLRTAPKESAAPWDRSPTDEARSLLCRSPGEAGWQWVATGTATRPRGSSAAVRSSPLRIPSHHAPSPRSRNGSDSALRLRGAAAPPGGRLPLTAPNPAARPTPAPRRRCACKGSPRVPAPRRSAAAVGSAGLRGSVAARPGGGVAGTARSGGAAARPAQRQLAAHAQLVLYCFKELTSVRAAPMSKRARGRLCTQFTNYQNPKRX
g_94	original_DE	bac	n.d.	-16.25	g_94
g_94	qseq	n.d.	n.d.	n.d.	MKSTQLAKTAHSPNEEARPGLPSPRPPQLGLDSAPGAGGGSGRRSPGPAARPRPSLPGAEPLRPHPPTANPRRSGPTHLRLPVGGRAAPGPARRYLRLRLGTAPQRPARQRATPPAALRYCSAPWRRGGASALRERNSRX
g_95	original_DE	euk	n.d.	-16.25	g_95
g_95	qseq	n.d.	n.d.	n.d.	MLAAENAVAGSASGSPRAMALCGAVDRVRSRSCAACGWVTAGGCGRMSAAPLPTPASPSRALRPPHPWIPSWAESDAFRSSRKAARPWHSIAPCRDTSRRAAGADLERCGGARRRGGRCQAAGGGGSAARPPPSPAGSEARGGAPPPSPAAPSPATGRHGPGAGGVRALPARPRAHGGRCVCGGEASPSTFAEEFLVREGGWGGLQVRQRARRSRLGMERPGVPGRRAERQREAVGRGCEFRIAALLPLCQREAEEPQVKRFLRAPPGKESRGVLERCSAHLCPX
g_96	original_DE	euk	n.d.	-16.25	g_96
g_96	qseq	n.d.	n.d.	n.d.	MPSDTITYSLEKRARKSSRYVTGEQDGEVPGSSGQAGRLRGSSPSTPAEEQESSVPASDEDSPARTTESWQWPLSSSETHSNVGEDFEGFQTPARTPECTMDIQSPGDQSLSRTPQFESDSPEEEGNDEMNEEHRGVEPVPRDRGWRGQPQLTEGEKLLMETNSRIVQLLENIKREHAQSMGLMSQSMGRMELQLGIVATSTRAIHNYLSEILAFLKQPRTQVLETRISQRATPHVELTCASTWTGEDAVAASTVCLPGAEGTSDSREPPQATLPCRSGRLQRAITERASLPMPTRQAKGGGKKKX
g_96	DE	0.773209	0.399288	0.731707	SH3 and multiple ankyrin repeat domains 2
g_96	GN	n.d.	n.d.	n.d.	SHANK2
g_96	MF_ARGOT	15.1628	0.851791	30160	synaptic receptor adaptor activity
g_96	CC_ARGOT	11.2306	0.791296	43197	dendritic spine
g_96	MF_ARGOT	14.3773	0.847099	35255	ionotropic glutamate receptor binding
g_96	CC_ARGOT	10.3123	0.770977	14069	postsynaptic density
g_96	CC_ARGOT	9.50753	0.752414	45211	postsynaptic membrane
g_97	original_DE	euk	n.d.	-16.25	g_97
g_97	qseq	n.d.	n.d.	n.d.	MKEQTQQIPGKVDTVKADLNKPLYIDTKLRPNIETTFPVTATVTRQNTRGPLRRQETENKYETDAGKEKKAEEKKNMLINIVDTSQQKSAGLLMVHTVDTAKSDDTSPEDEEEKGAEMEPSPENSLPERPEGSEEAESELNVPAVPEPPASPCKTIVAASSVDDPVILPFRIPPPPLASVDIDEEFIFTEPLPPPLEFANSFDIPDDRSVPASALTDLIKQRKNGTPSPAPFVTSQPTNSLDSKKQVGLSNCLPASFLPPPDSFDNVTDSGIEEVDSRSSSDHHLETTSTISTVSSISTLSSEGCENVDTCTVYADGQTFLVDKPPVPPKPKMKPIINKSNALYKDALIEETVDSFVIPPPAPPPPPISAQPNMAKVVPQRTSKLWGDVTEVKSPILSG…
g_98	original_DE	bac	n.d.	-16.25	g_98
g_98	qseq	n.d.	n.d.	n.d.	MPGPVAPPPPRRAARPSAGQHPPLSGQPRALGSPTAEPGTLRPPLTLLAAGCRSPGSRGASRADGGGDFRFSRAPTSSSLTAGRLQVGDGRPYRPAPRREPGRFLSLGSSQSSANQTSVGCGFENALSGIX
g_99	original_DE	bac	n.d.	-16.25	g_99
g_99	qseq	n.d.	n.d.	n.d.	MTNFMQLALGSSRPAQAPRRNGGTRSCGPHRSSPQKRPAEQRCWVNRRSLLPRRRAAPLSPLKAPNREPARGGSGAARAERAPLFGPYRAVPPSRARLRLPPPPPRPWRPISGRPRPGRVPPRPAARMARPRGAVKAPRSRRARIAAGRPAAARRASPESHRLRATASRVSRRPLRLVHKSVRGPTMHRERSAHSPPFSPPPSLLSVQWLPFSSAPALVAESLEFESRFLAHPSLSLQATLPPPTGARPKEGLPHLGGSALGWKACSLSNRAGPESLPAPEWPRHRAQX
g_100	original_DE	euk	n.d.	-13.2	g_100
g_100	qseq	n.d.	n.d.	n.d.	MDPFLALLNSLSASLSGSELHELKFLCQHKIGKRKLESVQSGRELFNFLMEQQLIARHNVDLLKSMLKSIKREDLIERLKQFIEEGEASAPDERPDIKERRLQKVVIEVICENVGRDWKMLMRKLDLSDVKMDRIVAANPHDLREQLVQSLREWQEWKGKDAKVTDLIKALRDCNMNLVADIAEQNLSRLNTENMX
g_100	DE	3.77112	0.968076	0.673913	FAS-associated death domain protein (Fragment)
g_100	GN	n.d.	n.d.	n.d.	FADD
g_100	CC_ARGOT	16.6463	0.860332	31265	CD95 death-inducing signaling complex
g_100	MF_ARGOT	16.5134	0.859583	89720	caspase binding
g_100	BP_ARGOT	12.438	0.816786	97191	extrinsic apoptotic signaling pathway
g_100	MF_ARGOT	13.8073	0.843613	5123	death receptor binding
g_100	BP_ARGOT	10.9364	0.78488	45089	positive regulation of innate immune response
g_100	CC_ARGOT	1.51311	0.483309	97342	ripoptosome
g_100	MF_ARGOT	1.55	0.485473	35877	death effector domain binding
g_100	MF_ARGOT	0.95356	0.446488	35591	signaling adaptor activity
g_100	BP_ARGOT	8.74477	0.734079	42981	regulation of apoptotic process
g_100	MF_ARGOT	0.690584	0.425363	42802	identical protein binding
g_100	BP_ARGOT	1.73278	0.495834	2000454	positive regulation of CD8-positive, alpha-beta cytotoxic T cell extravasation
g_100	BP_ARGOT	1.38497	0.475578	45651	positive regulation of macrophage differentiation
g_100	BP_ARGOT	1.35565	0.47376	1900117	regulation of execution phase of apoptosis
g_100	BP_ARGOT	1.35413	0.473665	97049	motor neuron apoptotic process
g_100	BP_ARGOT	1.35367	0.473636	97527	necroptotic signaling pathway
g_100	BP_ARGOT	1.32565	0.471879	42104	positive regulation of activated T cell proliferation
g_100	BP_ARGOT	1.32404	0.471777	60546	negative regulation of necroptotic process
g_100	BP_ARGOT	1.31294	0.471075	48536	spleen development
g_100	BP_ARGOT	1.27339	0.46855	60338	regulation of type I interferon-mediated signaling pathway
g_100	BP_ARGOT	1.27174	0.468444	48538	thymus development
g_100	BP_ARGOT	1.23638	0.466151	32757	positive regulation of interleukin-8 production
g_100	BP_ARGOT	1.23364	0.465972	43029	T cell homeostasis
g_100	BP_ARGOT	1.22395	0.465338	1961	positive regulation of cytokine-mediated signaling pathway
g_100	BP_ARGOT	1.21363	0.464659	71260	cellular response to mechanical stimulus
g_100	BP_ARGOT	1.20889	0.464347	32760	positive regulation of tumor necrosis factor production
g_100	BP_ARGOT	1.20274	0.46394	32729	positive regulation of type II interferon production
g_100	BP_ARGOT	1.11383	0.457941	38034	signal transduction in absence of ligand
g_100	BP_ARGOT	0.95819	0.446832	1916	positive regulation of T cell mediated cytotoxicity
g_100	BP_ARGOT	0.955707	0.446648	43123	positive regulation of canonical NF-kappaB signal transduction
g_100	BP_ARGOT	0.941628	0.445598	33077	T cell differentiation in thymus
g_100	BP_ARGOT	0.922471	0.444158	2683	negative regulation of immune system process
g_100	BP_ARGOT	0.868084	0.439984	43068	positive regulation of programmed cell death
g_100	BP_ARGOT	0.817124	0.435953	45862	positive regulation of proteolysis
g_100	BP_ARGOT	0.776976	0.432688	51607	defense response to virus
g_100	BP_ARGOT	0.647477	0.421537	45944	positive regulation of transcription by RNA polymerase II
g_100	BP_ARGOT	0.46707	0.403933	65003	protein-containing complex assembly
g_101	original_DE	euk	n.d.	-13.2	g_101
g_101	qseq	n.d.	n.d.	n.d.	MRVNKKYSCLPAEEKGIHIINIRAIEDIGYDQHESTLLNSLSKNPDADCKYGLYFRDGKRKVDYILVYHYKKSSAGRTLTRRAQHNDAGARSTKQDPLPGKGVQMEMGESEPHADCHEDDKRFRREEYEGNLVEAGLELEHDEDTKIHGVGFVKIHAPWNVLCREAEFLKLKMPTKKMYQINQTHGLLKKINSVIQKITEPIQPKVAEHKPQTVKRLSYPFSREKQHLFDLSDRDSFFDSKTRSTIVYEILKRTTCTKAKYSMGKKHYX
g_102	original_DE	bac	n.d.	-13.2	g_102
g_102	qseq	n.d.	n.d.	n.d.	MAAPGRVPPPPSPTSLGDPRSLLGQRTAEDPLGDPGARGDVLSGTARIDSRPSSQVCPSLPFSPCCAGRQRAQDX
g_103	original_DE	euk	n.d.	-13.2	g_103
g_103	qseq	n.d.	n.d.	n.d.	MLVIWLLLLALLPEPRVPAATASPRAPRDAGGRGGVYEHLGGAPRRRKLYCATKYHLQIHPGGKINGTLEKNSVFSILEITAVDVGIVAIKGLFSGRYLAMNKRGRLYASENYNTECEFVERIHELGYNTYASRLYRTVPSGASTKRKASAERLWYVSVNGKGRPRRGFKTRRTQKSSLFLPRVLDSKDHEMVRLFHTNVRYRESLLKPPSKNQRRRRGRX
g_103	DE	1.11326	0.55632	0.571429	Fibroblast growth factor (Fragment)
g_103	GN	n.d.	n.d.	n.d.	FGF3
g_103	BP_ARGOT	12.0118	0.807934	51781	positive regulation of cell division
g_103	MF_ARGOT	10.29	0.770474	8083	growth factor activity
g_103	CC_ARGOT	0.0778234	0.345206	5615	extracellular space
g_103	BP_ARGOT	6.74292	0.681743	30154	cell differentiation
g_103	CC_ARGOT	0.0174901	0.323903	5737	cytoplasm
g_103	CC_ARGOT	0.00907371	0.318531	16020	membrane
g_103	BP_ARGOT	3.94449	0.593078	7165	signal transduction
g_103	MF_ARGOT	0.155013	0.361868	5104	fibroblast growth factor receptor binding
g_103	BP_ARGOT	1.48658	0.481736	55026	negative regulation of cardiac muscle tissue development
g_103	BP_ARGOT	0.899941	0.442444	44344	cellular response to fibroblast growth factor stimulus
g_103	BP_ARGOT	0.749084	0.43037	8284	positive regulation of cell population proliferation
g_103	BP_ARGOT	0.12346	0.355719	43410	positive regulation of MAPK cascade
g_103	BP_ARGOT	0.114267	0.353783	30334	regulation of cell migration
g_103	BP_ARGOT	0.0851068	0.347059	7399	nervous system development
g_104	original_DE	euk	n.d.	-13.2	g_104
g_104	qseq	n.d.	n.d.	n.d.	MPFPAALLPALLLGLLWPGAVRGRPPPSRLPAGPRQRRWDAALFARSVARLPAERRDAARDGDYLLGIKRLRRLYCNVGIGFHIQVLPDGRIDGIHSENRYSLLEISPVERGVVSIFGVRSGLFVAMNSKGKLYGSIHFNDECKFKEILLPNNYNAYESRIYPGMYIALSKNGRTKKGNKVSPTMTVTHFLPRIX
g_104	DE	1.11296	0.556196	0.571429	Fibroblast growth factor (Fragment)
g_104	GN	n.d.	n.d.	n.d.	FGF4
g_104	BP_ARGOT	12.0118	0.807934	51781	positive regulation of cell division
g_104	MF_ARGOT	10.29	0.770473	8083	growth factor activity
g_104	CC_ARGOT	5.39848	0.642067	5576	extracellular region
g_104	BP_ARGOT	6.74291	0.681743	30154	cell differentiation
g_104	CC_ARGOT	0.0318996	0.330633	5737	cytoplasm
g_104	BP_ARGOT	3.94448	0.593078	7165	signal transduction
g_104	MF_ARGOT	0.282722	0.381905	5104	fibroblast growth factor receptor binding
g_104	BP_ARGOT	1.16259	0.461259	60363	cranial suture morphogenesis
g_104	BP_ARGOT	1.07223	0.455052	2000544	regulation of endothelial cell chemotaxis to fibroblast growth factor
g_104	BP_ARGOT	1.06096	0.45426	60561	apoptotic process involved in morphogenesis
g_104	BP_ARGOT	1.05907	0.454127	1502	cartilage condensation
g_104	BP_ARGOT	1.03288	0.452268	10463	mesenchymal cell proliferation
g_104	BP_ARGOT	1.02428	0.451652	35116	embryonic hindlimb morphogenesis
g_104	BP_ARGOT	0.991694	0.449296	1904019	epithelial cell apoptotic process
g_104	BP_ARGOT	0.967325	0.447508	35019	somatic stem cell population maintenance
g_104	BP_ARGOT	0.964888	0.447328	2000648	positive regulation of stem cell proliferation
g_104	BP_ARGOT	0.93743	0.445284	72089	stem cell proliferation
g_104	BP_ARGOT	0.89803	0.442298	1990830	cellular response to leukemia inhibitory factor
g_104	BP_ARGOT	0.890175	0.441695	44344	cellular response to fibroblast growth factor stimulus
g_104	BP_ARGOT	0.790273	0.433779	43410	positive regulation of MAPK cascade
g_104	BP_ARGOT	0.741077	0.429697	70372	regulation of ERK1 and ERK2 cascade
g_104	BP_ARGOT	0.627567	0.419726	43066	negative regulation of apoptotic process
g_104	BP_ARGOT	0.518759	0.40928	10628	positive regulation of gene expression
g_104	BP_ARGOT	0.494987	0.406856	45944	positive regulation of transcription by RNA polymerase II
g_104	BP_ARGOT	0.155223	0.361906	7399	nervous system development
g_105	original_DE	bac	n.d.	-13.2	g_105
g_105	qseq	n.d.	n.d.	n.d.	MAEWQRSPGAAPVRPEAPCHAVPGRAMPCRDVSRSDKPARAGPSLWCRAVAALTPCSRRGGAAPAGREPHGGRGALEPPSWSVAEPCPAHGPFLRAGYTSIPRAX
g_106	original_DE	bac	n.d.	-13.2	g_106
g_106	qseq	n.d.	n.d.	n.d.	MMSLEGKARRCVTDPTNSRYETGSILELDAAESIGLITEAYKKPGGRLGPCYIPPATSPAAQSAQPRTAPPPHRPRQRRRPTRAX
g_107	original_DE	euk	n.d.	-13.2	g_107
g_107	qseq	n.d.	n.d.	n.d.	MGPRPAAPGAALALLGIAAAAAAARSLPLPDAGPHVNYGWGEPIRLRHLYTASKHGLFSCFLRIGGDGRVDAVGSQSPQSLLEIRAVAVRTVAIKGVQSSRYLCMDEAGRLHGQLSYSIEDCSFEEEIRPDGYNVYKSKKYGISVSLSSAKQRQQFKGKDFLPLSHFLPMINTVPVEVTDFGEYGDYSQAFEPEVYSSPLETDSMDPFGITSKLSPMKSPSFQKX
g_107	DE	1.11653	0.557708	0.571429	Fibroblast growth factor (Fragment)
g_107	GN	n.d.	n.d.	n.d.	FGF19
g_107	MF_ARGOT	13.6345	0.84085	5104	fibroblast growth factor receptor binding
g_107	BP_ARGOT	12.3819	0.815629	8543	fibroblast growth factor receptor signaling pathway
g_107	CC_ARGOT	5.39849	0.642067	5576	extracellular region
g_107	MF_ARGOT	10.29	0.770474	8083	growth factor activity
g_107	CC_ARGOT	0.0169186	0.323586	5737	cytoplasm
g_107	BP_ARGOT	1.22668	0.465517	1904252	negative regulation of bile acid metabolic process
g_107	BP_ARGOT	1.05174	0.453609	10894	negative regulation of steroid biosynthetic process
g_107	BP_ARGOT	1.04112	0.452855	70857	regulation of bile acid biosynthetic process
g_107	BP_ARGOT	0.995175	0.449549	46326	positive regulation of D-glucose import
g_107	BP_ARGOT	0.831996	0.437142	46330	positive regulation of JNK cascade
g_107	BP_ARGOT	0.790546	0.433801	1755	neural crest cell migration
g_107	BP_ARGOT	0.76763	0.431916	70374	positive regulation of ERK1 and ERK2 cascade
g_107	BP_ARGOT	0.652925	0.422027	7507	heart development
g_107	BP_ARGOT	0.636073	0.420503	8284	positive regulation of cell population proliferation
g_107	BP_ARGOT	0.611052	0.418203	9617	response to bacterium
g_107	BP_ARGOT	0.449701	0.402071	10629	negative regulation of gene expression
g_107	BP_ARGOT	0.110534	0.352974	30334	regulation of cell migration
g_107	BP_ARGOT	0.0887716	0.347962	22008	neurogenesis
g_108	original_DE	bac	n.d.	-13.2	g_108
g_108	qseq	n.d.	n.d.	n.d.	MLMGIQHSHGTNGALAPPTACKAGGALRPIGGCCEERSADRHSRALRDGRLRACSLGRRDAAPPARRRLPACX
g_109	original_DE	euk	n.d.	-13.2	g_109
g_109	qseq	n.d.	n.d.	n.d.	MEHQLLCCEVETIRRAYLDANLLNDRVLQTMLKAEETCSPSVSYFKCVQKEILPYMRKIVATWMLEVCEEQKCEEEVFPLAMNYLDRFLSFEPLKKSRLQLLGATCMFVASKMKETIPLTAEKLCIYTDNSIRPDELLQMELLLVNKLKWNLAAMTPHDFIEHFLTKMPLAEDTKQIIRKHAQTFVALCATEREGKAVLQISRFPQTRAEEQDKRSPGGKIKICSNTARSVRWLSGLVVRSTGERERASFMALPAYGRSAVTLRSPGDGALPGIVRSGLPAWTGVGRLGPVAARSGRHRCLGAAAGSX
g_109	DE	2.61765	0.947346	0.205882	G1/S-specific cyclin-D1 isoform X1
g_109	GN	n.d.	n.d.	n.d.	CCND1
g_109	BP_ARGOT	6.14119	0.664526	51301	cell division
g_109	CC_ARGOT	3.47391	0.57533	5634	nucleus
g_109	MF_ARGOT	0.964237	0.44728	16538	cyclin-dependent protein serine/threonine kinase regulator activity
g_109	BP_ARGOT	0.976898	0.448213	44772	mitotic cell cycle phase transition
g_109	MF_ARGOT	0.51547	0.408948	70064	proline-rich region binding
g_109	CC_ARGOT	1.53838	0.484794	5737	cytoplasm
g_109	BP_ARGOT	0.582493	0.415518	320	re-entry into mitotic cell cycle
g_109	CC_ARGOT	0.712646	0.427275	97131	cyclin D1-CDK6 complex
g_109	MF_ARGOT	0.383427	0.39461	42826	histone deacetylase binding
g_109	CC_ARGOT	0.600815	0.417248	97128	cyclin D1-CDK4 complex
g_109	BP_ARGOT	0.546259	0.412016	33601	positive regulation of mammary gland epithelial cell proliferation
g_109	MF_ARGOT	0.355492	0.391273	43539	protein serine/threonine kinase activator activity
g_109	BP_ARGOT	0.532968	0.410703	97421	liver regeneration
g_109	BP_ARGOT	0.517146	0.409117	70141	response to UV-A
g_109	MF_ARGOT	0.291845	0.383141	3714	transcription corepressor activity
g_109	BP_ARGOT	0.514308	0.408831	2000045	regulation of G1/S transition of mitotic cell cycle
g_109	CC_ARGOT	0.332416	0.388416	17053	transcription repressor complex
g_109	MF_ARGOT	0.288533	0.382695	19901	protein kinase binding
g_109	CC_ARGOT	0.323118	0.387237	5923	bicellular tight junction
g_109	BP_ARGOT	0.509735	0.408367	44843	cell cycle G1/S phase transition
g_109	BP_ARGOT	0.492046	0.406552	1901992	positive regulation of mitotic cell cycle phase transition
g_109	MF_ARGOT	0.157638	0.36235	4672	protein kinase activity
g_109	BP_ARGOT	0.474052	0.404672	30857	negative regulation of epithelial cell differentiation
g_109	BP_ARGOT	0.472212	0.404478	44321	response to leptin
g_109	CC_ARGOT	0.166587	0.363964	70013	intracellular organelle lumen
g_109	BP_ARGOT	0.42234	0.399062	45444	fat cell differentiation
g_109	BP_ARGOT	0.416183	0.398372	1902807	negative regulation of cell cycle G1/S phase transition
g_109	CC_ARGOT	0.0817682	0.34622	5815	microtubule organizing center
g_109	BP_ARGOT	0.411733	0.39787	1902751	positive regulation of cell cycle G2/M phase transition
g_109	BP_ARGOT	0.386182	0.394932	43524	negative regulation of neuron apoptotic process
g_109	BP_ARGOT	0.34021	0.389392	44773	mitotic DNA damage checkpoint signaling
g_109	BP_ARGOT	0.336741	0.388959	8283	cell population proliferation
g_109	BP_ARGOT	0.336128	0.388882	10389	regulation of G2/M transition of mitotic cell cycle
g_109	BP_ARGOT	0.333934	0.388607	30968	endoplasmic reticulum unfolded protein response
g_109	BP_ARGOT	0.318245	0.386612	1901991	negative regulation of mitotic cell cycle phase transition
g_109	BP_ARGOT	0.295518	0.383633	9410	response to xenobiotic stimulus
g_109	BP_ARGOT	0.287023	0.38249	16055	Wnt signaling pathway
g_109	BP_ARGOT	0.267642	0.379818	122	negative regulation of transcription by RNA polymerase II
g_109	BP_ARGOT	0.249499	0.377227	30182	neuron differentiation
g_109	BP_ARGOT	0.214079	0.371882	45737	positive regulation of cyclin-dependent protein serine/threonine kinase activity
g_109	BP_ARGOT	0.146275	0.360233	1902808	positive regulation of cell cycle G1/S phase transition
g_110	original_DE	bac	n.d.	-13.2	g_110
g_110	qseq	n.d.	n.d.	n.d.	MRDGGGAVRRPPGEGIEGPRRSPFRPVPFVSAGPGGEICPARPPGGSPAGPRASAAPCRRRRPPRAPRSPGAAGTRSGRVRAALKRPDRAHVGRGAAPAGRDGAGPARGLAPFLSPSGAAWGCGSARSAASPRVRGGQAELCFINITAPRPTWAVNAGARVSRAAGRKGAGRLHTLTPCGPAPPRAGSRWRPSSGVRWRRVVSDQTTWAHGCTAAWPTALVLLTPQRYRMALQRAHDGHEAVAWLPIKAARSLGSSRSCGSGLAGLSSCQPSLQHPPVGPRLRPGPEMLRGGSQLGTERSASRX
g_111	original_DE	euk	n.d.	-13.2	g_111
g_111	qseq	n.d.	n.d.	n.d.	MRTGASHSATPVPPLPRDGHLTGPDRCEPTAVGPSGPRLTPSPPFGSRASRSGPTGVSREGWAAPAGRGVPAGRGCRMPLPAPKRSARLHAGAHRRPEPTRRARCGPPLPSRHSPTARSHRPTAPACPSGPQPSALLGPLPARGSRPEERRGPRVAASRATEPPRGARPRGPAAREECALPRRGRAPLPFVSGGGERGPADVMRKCRRRAAVPAAGAAGRAGRKRIAAPRWRGAARPFSLRGSARSRDRX
g_112	original_DE	bac	n.d.	-13.2	g_112
g_112	qseq	n.d.	n.d.	n.d.	MHTHQQTGRVHTALRGAEQPAARDTNRASARRGAGPRTRTDGTALEPPPRGAALPLLNGSGSEPPHWLRRPPGWPISVPGAGGAVPPSALLAWGARARSGGVAGSRPAAARETQACQX
g_113	original_DE	euk	n.d.	-13.2	g_113
g_113	qseq	n.d.	n.d.	n.d.	MEAGAAAETEPLLPPRSWRAAGGAAGAAEDLYINQAVVFIEDAIQYRSINHRVDSKSLWLYRWYYSRICQWILSLTITVILALAFIETPSSLTVTSDVRYRLPAWDPPCGLTESIELLCFLVFMIDVSVKVSSASTWLX
g_114	original_DE	euk	n.d.	-13.2	g_114
g_114	qseq	n.d.	n.d.	n.d.	MAMAAGLARLPAVCNQRLAELLRQVDDADLVWLEEIHEEAARMFGSHYNDQPELMPKTPSQKNRKRRKRPSALRGESLELGRRRLSRRRTNNLKAVSSNRCSQRLQNKEDAGPLSTEAQELSSQTVSRQLTRSQVAVSADHSEVLPERLGERVVPVVEISVCDRISAEIQFQKCASVPAENHSTSLPVSSDDKSPKDSSAAESQPLPAASELAVPHTPEAKGAGKNKSAFKKTANAADTTVVLSEEPGLEEVDDSAQAQKHDGRDDKEPQRTTDSPETPTGSRLSRRSVRRSLMGKPSTIRRTSLAEKYSLARKRESAIRKSIARTVIKRKVPQKLSVSSSSVNGSGSEAVPDDEETVVNTGPSPVPRTPPKLDFQGLRMSLRSQTVNRNEQQQETSNN…
g_114	DE	2.40931	0.922747	0.347826	INCE protein (Fragment)
g_114	GN	n.d.	n.d.	n.d.	INCENP
g_114	BP_ARGOT	16.1263	0.857383	51257	meiotic spindle midzone assembly
g_114	CC_ARGOT	16.012	0.856729	1990385	meiotic spindle midzone
g_114	MF_ARGOT	0.0628255	0.341094	5515	protein binding
g_114	CC_ARGOT	12.8618	0.825435	32133	chromosome passenger complex
g_114	BP_ARGOT	11.3817	0.794558	51310	metaphase chromosome alignment
g_114	CC_ARGOT	11.4107	0.795182	30496	midbody
g_114	BP_ARGOT	10.9143	0.784394	281	mitotic cytokinesis
g_114	CC_ARGOT	9.71487	0.757269	776	kinetochore
g_114	CC_ARGOT	4.31959	0.606478	5874	microtubule
g_114	CC_ARGOT	3.47397	0.575332	5634	nucleus
g_114	CC_ARGOT	1.53841	0.484795	5737	cytoplasm
g_114	CC_ARGOT	0.179596	0.366234	5721	pericentric heterochromatin
g_115	original_DE	bac	n.d.	-13.2	g_115
g_115	qseq	n.d.	n.d.	n.d.	MAAADGPMRLLEVCGQRLSRFLYDAEHKHLAWLREVEEQGLRMLDSNDFRAEPGLMPKTPSQRRRPRKRQSSALKDENEPTRRRWVSLALLHVAFNSEMKFX
g_116	original_DE	euk	n.d.	-13.2	g_116
g_116	qseq	n.d.	n.d.	n.d.	MGWGAGRRPAMLLGPWLVAVVAVVAAGAGAGCPVLCTCRGQAVDCSGQRLFSVPAELPLDTGNLSLAHNRIASIPLGYLACYAQLRVLDLRNNSLAALPARLFLGARRLTHLDLSYNNFSLVTADMFLEASELLRLDLSHNPWLCTVHPRAFRGLAQLRELDLSYGGLSALSLDALEGLTGLVTLRIGGNPWVCGCAMEPFLKWLKSRIQLCTSDSQLAKCQAPPEVKEVPLFSLTEESFKACHLTLTLDDYLFIAFVGFVVSIASVATNFLLGITANCCHRWSKASEDEEVX
g_116	DE	2.60827	0.946442	0.829268	Leucine-rich repeat-containing protein 55
g_116	GN	n.d.	n.d.	n.d.	LRRC55
g_116	MF_ARGOT	16.3215	0.858496	99104	potassium channel activator activity
g_116	CC_ARGOT	10.3879	0.772683	8076	voltage-gated potassium channel complex
g_116	BP_ARGOT	7.63743	0.705973	71805	potassium ion transmembrane transport
g_116	MF_ARGOT	11.7067	0.801503	44325	transmembrane transporter binding
g_116	MF_ARGOT	9.5446	0.753286	5249	voltage-gated potassium channel activity
g_116	BP_ARGOT	0.327473	0.387791	7616	long-term memory
g_117	original_DE	euk	n.d.	-13.2	g_117
g_117	qseq	n.d.	n.d.	n.d.	MEEMAYAYTEGDNETDCEYEEWGLSLALLPTIYLLVFLLGTAGNGLVLWTIFKGGRERRRSADTFIANLAAADLTFVVTLPLWAAYAWLGYHWPFGTAACKVSSYLVFVNMYASVFCLTGLSFDRYLAIVRPLATAKLRSRVSGLLATVALWVLAALLALPALVLRQAAVLGGDTKVTCYMDYGGLAAPGTEAAWEVGLGLSSTLLGFVAPFAVMLTCYFFIARTVATHFRRERAEGPRKRKRLLTIIAVLVAAFGGCWLPFHLVKTLYVLMDLEVLPWSCGLHAFLNNFHPYCTGIAYINSCLNPFLYAFFDPHFRRACAALLCCRPPGPGAERSGSFSSGHSHTPGGKGALAMGGKLDPATQETLFRSX
g_117	DE	2.475	0.931529	0.8	Apelin receptor
g_117	GN	n.d.	n.d.	n.d.	APLNR
g_117	BP_ARGOT	14.4397	0.847476	30593	neutrophil chemotaxis
g_117	MF_ARGOT	13.4858	0.837919	19957	C-C chemokine binding
g_117	CC_ARGOT	9.30372	0.747589	9897	external side of plasma membrane
g_117	MF_ARGOT	13.2804	0.833843	16493	C-C chemokine receptor activity
g_117	BP_ARGOT	12.1017	0.809814	70098	chemokine-mediated signaling pathway
g_117	BP_ARGOT	12.0406	0.808538	7204	positive regulation of cytosolic calcium ion concentration
g_117	BP_ARGOT	10.3842	0.7726	19722	calcium-mediated signaling
g_117	MF_ARGOT	0.256224	0.378198	60182	apelin receptor activity
g_117	BP_ARGOT	7.76143	0.709218	6955	immune response
g_117	BP_ARGOT	2.43246	0.531159	1904022	positive regulation of G protein-coupled receptor internalization
g_117	BP_ARGOT	1.89485	0.504573	51281	positive regulation of release of sequestered calcium ion into cytosol
g_117	BP_ARGOT	1.72972	0.495666	43951	negative regulation of cAMP-mediated signaling
g_117	BP_ARGOT	1.51807	0.483601	45766	positive regulation of angiogenesis
g_117	BP_ARGOT	1.18572	0.46281	1903596	regulation of gap junction assembly
g_117	BP_ARGOT	1.17646	0.462191	60183	apelin receptor signaling pathway
g_117	BP_ARGOT	1.1694	0.461717	1903589	positive regulation of blood vessel endothelial cell proliferation involved in sprouting angiogenesis
g_117	BP_ARGOT	1.12592	0.458771	35886	vascular associated smooth muscle cell differentiation
g_117	BP_ARGOT	1.12548	0.458741	60841	venous blood vessel development
g_117	BP_ARGOT	1.1076	0.457512	3272	endocardial cushion formation
g_117	BP_ARGOT	1.0696	0.454868	60412	ventricular septum morphogenesis
g_117	BP_ARGOT	1.06271	0.454383	3171	atrioventricular valve development
g_117	BP_ARGOT	1.04952	0.453452	60976	coronary vasculature development
g_117	BP_ARGOT	1.04039	0.452803	7512	adult heart development
g_117	BP_ARGOT	1.01705	0.451133	35904	aorta development
g_117	BP_ARGOT	0.970185	0.447719	1947	heart looping
g_117	BP_ARGOT	0.932629	0.444924	1570	vasculogenesis
g_117	BP_ARGOT	0.474372	0.404706	10629	negative regulation of gene expression
g_118	original_DE	euk	n.d.	-13.2	g_118
g_118	qseq	n.d.	n.d.	n.d.	MASQPQSLHPPLPCASGGAGLAAGSPEKGSPRPKPPVRPKPRVLPKPAVPAKPCLPHPPPAPRHSRPELPSAEKINRLAGPQPYSGGGSGVALRRPSFTIKSPETPNGKGLPSPPVLTPEDSCSNPSDEVPLAPSTPSRKGPAPFKVTPVPVATKLERFPGTTVEEILAKMDSKEGLGSPDRARLSPFCPDSSSRFGSKTFTAFRRRPSGEADGDSPGEAHQLLQQAEGELGTGGDRCLMVEMSSSSSPAGPSCAGDPCGLWRPPSPPDLSSLQLGPPGSPRPPACPPPGAPFQPAEPSASAPGSPDAPPELLAPGSPTVALESPKSPAQPPSEELLATSIQAPGAPSSVAEPWLGASCSPGSPHTPSEGSPTPASPSTLGAPQLSPRATCPPGSPESA…
g_118	DE	1.26689	0.618966	0.734375	Tankyrase 1-binding protein C-terminal domain-containing protein
g_118	GN	n.d.	n.d.	n.d.	TNKS1BP1
g_118	BP_ARGOT	14.0101	0.844861	71479	cellular response to ionizing radiation
g_118	CC_ARGOT	12.1248	0.810296	792	heterochromatin
g_118	MF_ARGOT	2.13783	0.517001	71532	ankyrin repeat binding
g_118	MF_ARGOT	0.925427	0.444381	19899	enzyme binding
g_118	CC_ARGOT	3.47377	0.575325	5634	nucleus
g_118	MF_ARGOT	0.856687	0.439093	44877	protein-containing complex binding
g_118	BP_ARGOT	7.92511	0.713461	6302	double-strand break repair
g_118	CC_ARGOT	1.3854	0.475605	30014	CCR4-NOT complex
g_118	CC_ARGOT	1.27804	0.468849	5912	adherens junction
g_118	CC_ARGOT	0.31989	0.386823	5886	plasma membrane
g_118	CC_ARGOT	0.19301	0.368491	5737	cytoplasm
g_119	original_DE	euk	n.d.	-13.2	g_119
g_119	qseq	n.d.	n.d.	n.d.	MADTLEFNEIYQEVKGSMNDGRLRLSRQGVIFKNSKTGKVDNIQASELAEGVWRRVALGHGLKLLTKNGHVYKYDGFRESEFDKLSDFFKAHYRLELAEKDLCVKGWNWGTVRFGGQLLSFDIGEQPVFEIPLSNVSQCTTGKNEVTLEFHQNDDAEVSLMEVRFYVPPTQEDGVDPVEAFAQNVLSKADVIQATGDAICIFRELQCLTPRGRYDIRIYPTFLHLHGKTFDYKIPYTTVLRLFLLPHKDQRQMFFVISLDPPIKQGQTRYHFLILLFSKDEDISLTLNMNEEEVEKRFEGRLTKNMSGSLYEMVSRVMKALVNRKITVPGNFQGHSGAQCITCSYKASSGLLYPLERGFIYVHKPPVHIRFDEISFVNFARGTTTTRSFDFEIETKQGT…
g_119	DE	1.62612	0.745282	0.432432	FACT complex subunit SSRP1 (Fragment)
g_119	GN	n.d.	n.d.	n.d.	SSRP1
g_119	CC_ARGOT	13.6451	0.841058	35101	FACT complex
g_119	BP_ARGOT	13.2914	0.834061	1902275	regulation of chromatin organization
g_119	MF_ARGOT	11.138	0.789285	31491	nucleosome binding
g_119	MF_ARGOT	9.17793	0.744585	42393	histone binding
g_119	BP_ARGOT	5.9947	0.660209	6260	DNA replication
g_119	CC_ARGOT	7.0888	0.691292	5730	nucleolus
g_119	BP_ARGOT	5.22921	0.636736	6281	DNA repair
g_119	MF_ARGOT	3.20632	0.564698	3677	DNA binding
g_119	BP_ARGOT	0.795875	0.434236	6337	nucleosome disassembly
g_120	original_DE	euk	n.d.	-13.2	g_120
g_120	qseq	n.d.	n.d.	n.d.	MPPPRPQPRCLADFFSYETTKSVVVKSWVVGIVNRVVQLLILSYFIGWVFLHEKAYQVRDTVIESSVVTKVKGIGKYGDRVLDTADYVTPPQGTSVFVVVTKQILTENQEQGVCAESEATYRCASNRDCQGKGRNTGSGVLTGRCIPYNVTLRTCEIRGWCPPEVDTVDVPVMLEAENFTLFIKNSVRFPLFGFEKANLPPQVSAGELQRCRFHPEQQPLCPILRLGDVARFAGQDFASLAATGGVLGIKIGWVCDLDRAWELCLPRYSFTRLDSVTQHSPGSPGYNFRHARYYRGHNGTELRTLTKAFGIRFDVLVYGNAGKFGIVPTLINTVAAFTSIGVGTVLCDIILLNFLKGAEHYKARKFEEVPEASVPPAPTSPTGCAPGALGDQSREKQST…
g_120	DE	2.31836	0.909029	0.4	Purinergic receptor P2X 3
g_120	MF_ARGOT	14.1795	0.845897	4931	extracellularly ATP-gated monoatomic cation channel activity
g_120	BP_ARGOT	13.8105	0.843633	33198	response to ATP
g_120	CC_ARGOT	8.69441	0.732841	98794	postsynapse
g_120	MF_ARGOT	13.3252	0.834733	1614	purinergic nucleotide receptor activity
g_120	BP_ARGOT	12.4877	0.817807	35590	purinergic nucleotide receptor signaling pathway
g_120	CC_ARGOT	5.32113	0.639641	98686	hippocampal mossy fiber to CA3 synapse
g_120	BP_ARGOT	10.9885	0.786022	60079	excitatory postsynaptic potential
g_120	CC_ARGOT	4.89301	0.625884	98685	Schaffer collateral - CA1 synapse
g_120	CC_ARGOT	2.98585	0.5556	43235	receptor complex
g_120	CC_ARGOT	2.96383	0.554673	30424	axon
g_120	CC_ARGOT	2.54969	0.536552	5886	plasma membrane
g_120	BP_ARGOT	8.39435	0.725388	70588	calcium ion transmembrane transport
g_120	MF_ARGOT	3.05183	0.558357	5524	ATP binding
g_120	BP_ARGOT	5.90369	0.6575	30432	peristalsis
g_120	BP_ARGOT	5.66594	0.650323	70207	protein homotrimerization
g_120	BP_ARGOT	5.62937	0.649206	48266	behavioral response to pain
g_120	BP_ARGOT	5.52672	0.64605	14832	urinary bladder smooth muscle contraction
g_120	BP_ARGOT	4.52905	0.613708	7274	neuromuscular synaptic transmission
g_120	MF_ARGOT	0.0260185	0.328121	46872	metal ion binding
g_120	BP_ARGOT	4.15968	0.60084	9612	response to mechanical stimulus
g_120	BP_ARGOT	4.02146	0.595878	50909	sensory perception of taste
g_120	BP_ARGOT	3.96119	0.593688	48167	regulation of synaptic plasticity
g_120	BP_ARGOT	3.80502	0.587934	1666	response to hypoxia
g_120	BP_ARGOT	3.76196	0.586327	9409	response to cold
g_120	BP_ARGOT	3.7398	0.585496	9743	response to carbohydrate
g_120	BP_ARGOT	3.45569	0.574619	71407	cellular response to organic cyclic compound
g_120	BP_ARGOT	3.36876	0.571203	1901699	cellular response to nitrogen compound
g_120	BP_ARGOT	2.7726	0.546474	9408	response to heat
g_120	BP_ARGOT	2.71081	0.543765	1901701	cellular response to oxygen-containing compound
g_120	BP_ARGOT	1.8858	0.504095	51649	establishment of localization in cell
g_120	BP_ARGOT	0.194559	0.368746	10524	positive regulation of calcium ion transport into cytosol
g_120	BP_ARGOT	0.163406	0.363395	50850	positive regulation of calcium-mediated signaling
g_121	original_DE	euk	n.d.	-13.2	g_121
g_121	qseq	n.d.	n.d.	n.d.	MKTGLLLVLTLLGMASALRPAPLHTTNVTAGREEGSCRRFVVVKIWRTYRGAQHYCRHVYRGQLASVHSIATNELLRKLAATYTYCSPWIGAVTTCKGGSWKTCWEDLSPWNYANWACGQPRRRIRTCTVLSPRDGLWRSKACFVHRPFICQYX
g_121	DE	1.46016	0.690436	0.210526	Proteoglycan 3-like
g_121	BP_ARGOT	7.93711	0.71377	6955	immune response
g_121	MF_ARGOT	0.247882	0.376992	30246	carbohydrate binding
g_122	original_DE	euk	n.d.	-13.2	g_122
g_122	qseq	n.d.	n.d.	n.d.	MAGGAGRAKKLGTLLSGLLECGAFCGIIFGWASLVYVLKNLGYFKQWCEPLANLNSSGTPYPDCSGQDEQFSLVFTIGAFMNNFMTLPMGYVFDRFGTAVARLIAISLYTGGTLLVAFSTPDLAALLFPAMSMLSVGGILLILTNMQVGNLFGKYRSIIITLYNGAFDSSSAIFLIIKVLHEHGLSLRAMFFFMAACSAWHLLRTIFLMPRMHIPYPLPPAYNYGLSCPGRSQSYRTYEEKRPAEDDGPEEVPLEPSAPKGNAAVEPFWPCVLSWLFMWHVVWLSVMQLRHYLFIGTLNPLLDHLAFGNEHLVSIYTNAFAFTQLCGVLCAPWNGLILDCHKRNKAHRAEGAQGALADLQASVPSLVLTVTQCVLFSICAAVPVLPVQFLTFVLQVISR…
g_122	DE	1.95316	0.835715	0.545455	Solute carrier family 43 member 3
g_122	GN	n.d.	n.d.	n.d.	SLC43A3
g_122	MF_ARGOT	2.12774	0.5165	22857	transmembrane transporter activity
g_122	BP_ARGOT	1.74628	0.496577	55085	transmembrane transport
g_122	CC_ARGOT	0.921541	0.444088	16020	membrane
g_122	CC_ARGOT	0.575714	0.414872	45178	basal part of cell
g_122	BP_ARGOT	0.993226	0.449407	35344	hypoxanthine transport
g_122	BP_ARGOT	0.842901	0.438008	15854	guanine transport
g_122	CC_ARGOT	0.136588	0.358363	71944	cell periphery
g_122	BP_ARGOT	0.83831	0.437644	15853	adenine transport
g_122	BP_ARGOT	0.743864	0.429931	15908	fatty acid transport
g_122	MF_ARGOT	0.60567	0.417702	5319	lipid transporter activity
g_122	BP_ARGOT	0.471404	0.404393	42908	xenobiotic transport
g_123	original_DE	bac	n.d.	-13.2	g_123
g_123	qseq	n.d.	n.d.	n.d.	MCGAGVYPRGRQAARPQGPTERLGEDARPPGSSHWGREDSRVGPVADTSAGAFAPVDGTEGRSRVDREAAPLASHPRGTASLSAVPERALSAVLGAGRGTKDERPLPLEVTVSVQSSEPAGPDRATELSLIRAVRISAPPGRTGAEPRQCHSRRMRAGGSAPSRAEPGRASGGRGCSRGRWGVPGSGCPEPDPDPARRDGAVPGIREDCRSRWEX
g_124	original_DE	euk	n.d.	-13.2	g_124
g_124	qseq	n.d.	n.d.	n.d.	MRPPTARDLPRGGRLAALLLAALAWVPGGSPACPALCTCYVSPPTVSCQANNFSSVPAGLPPGARRLFLQNNVIRALRAGTFGPSTVTLWLYSNNISSIQPGTFRHLPALEELDLGDNPHLRVLAPDTFHGLRRLQALHLYRCQLASLPSAIFRGLHSLQYLYLQENGLLYLQDDLFADLANLSHLFLHGNRLRALSEGVFRGLPSLDRLLLHANRLVTVHRRAFHGLARLTILYLFNNSLAALPGDPLAALPALQFLRLNANPWACDCRARPLWAWFRRTRVSSSPVPCASPPHRRGTDLRHLRPRDFDGCPEEDEEEDEGKDEDDSDGGGGGGGAVAVVGTPGRALGRPGTLPAAPPSAFYRDGLPPHDLRGSQPRPPPPSRDSRGPPGDTPVAAAP…
g_124	DE	1.12084	0.559532	0.740741	Reticulon 4 receptor like 2
g_124	GN	n.d.	n.d.	n.d.	RTN4RL2
g_124	CC_ARGOT	2.5497	0.536552	5886	plasma membrane
g_124	MF_ARGOT	0.207705	0.370874	38023	signaling receptor activity
g_124	CC_ARGOT	0.264179	0.37933	9986	cell surface
g_125	original_DE	euk	n.d.	-13.2	g_125
g_125	qseq	n.d.	n.d.	n.d.	MDPLRAQQLAAELEVDMMADMYNRMTQACHLKCVPPHYKEAELSKGESVCLDRCVAKYLDVHERMGKKLTELSLQDEELLKRMQQGTGTAX
g_125	DE	1.07077	0.538085	0.945455	Mitochondrial import inner membrane translocase subunit
g_125	GN	n.d.	n.d.	n.d.	TIMM10
g_125	BP_ARGOT	12.7864	0.823907	45039	protein insertion into mitochondrial inner membrane
g_125	CC_ARGOT	5.29119	0.638698	5743	mitochondrial inner membrane
g_125	MF_ARGOT	0.684244	0.424808	32977	membrane insertase activity
g_125	MF_ARGOT	0.584105	0.415672	42803	protein homodimerization activity
g_125	MF_ARGOT	0.567268	0.414061	51087	protein-folding chaperone binding
g_125	CC_ARGOT	1.00968	0.450601	42719	mitochondrial intermembrane space protein transporter complex
g_125	CC_ARGOT	0.283693	0.382038	98796	membrane protein complex
g_126	original_DE	euk	n.d.	-13.2	g_126
g_126	qseq	n.d.	n.d.	n.d.	MESPTTGGAPTPSDTALGHLTQTSTGPTEGMVGGDSGESAVQEGQGEAGGAEGGTGGEGAGNVGIGGEVEAAKNCGSEAKGEAVGDAGSEANMAGDAGSKVKGEAAKDARSEAKGEAAKDAGSEAKGEAAEDAGSEAKGEAAKDARSEAKGEAAENAGSEAKGEVAKDAGSEVKGEAAKDTGSKTKGEAAEDAGIKAKGEAAEDAGSEAKGEAAEDAGSKAKGEAAEDAGSEAKGEAAEDAGSEAKGEAAEDAGSEAKAAGDAGKEPAAGQAAEHKAKGQARGSAVPLEEAEPGPRPAAAGSTKGQQEPTWLQDEDDELWPEFPPCSPTEEATSPTIPLSPTSPVSPTFPMSPTSPLSPVSPTSPTAGSTESSGGSESGVSAVGPRGRVPPRVAAVGRP…
g_126	DE	1.13793	0.566729	0.705882	Smoothelin like 1
g_126	GN	n.d.	n.d.	n.d.	SMTNL1
g_127	original_DE	euk	n.d.	-13.2	g_127
g_127	qseq	n.d.	n.d.	n.d.	MAMSRRLAMELEEVRRWGGVRDLHLVDGDVLRWRGLLLPNNRPYNMGAFRFELAFSPHHPLEPPRVTLLTSIHHPGVGPDGTVCQPLTSLESWEPLTCATHVLQDLLLLLDNPGTERVLRPELARELSERPEAFLHQAEEHTHRYAEPRPNTPGPX
g_128	original_DE	euk	n.d.	-13.2	g_128
g_128	qseq	n.d.	n.d.	n.d.	MKFCLLLVYLVATVTATVTLVSMPETTPSRRMKPVRLQPEQMVFPCPTTSPPGDTGTPTQLVPSSNASSMGEPSLDAVLEALEPLGPEEFVAVPEEPGTAANESTATSEPGTTTGPPSTPPGTITPPCPGDEEPAETCRAPTREQKEEVAKALGTFALRFYQHMAESAKPDTNLLFSPLNVALGLSHLLLGARGETQQRLAAILGYRPGLACVHSALQQLANVSGLLSATEIFHHPDLYLRPRFLNESWLYYEARPQELSGNESLDLQRINEWVRKATRGLVPQLLSQLPDEPRLVLLSAVYFQARWQKPFKTKHTVLLPFLRHGHPPVDVLTMTSKKYPVASFTDPHLQVQVGRLELSEGLSLVVLVPRGPPEALETVERALDPPTFLALLQRAANTP…
g_128	DE	1.18109	0.584616	0.678571	Plasma protease C1 inhibitor
g_128	GN	n.d.	n.d.	n.d.	SERPING1
g_128	MF_ARGOT	10.1569	0.76745	4867	serine-type endopeptidase inhibitor activity
g_128	CC_ARGOT	6.84501	0.684586	5615	extracellular space
g_128	BP_ARGOT	3.13259	0.561691	1869	negative regulation of complement activation, lectin pathway
g_128	MF_ARGOT	0.355795	0.39131	8233	peptidase activity
g_128	EC_ARGOT	0.355795	0.39131	EC:3.4.-.-	GO:0008233
g_128	BP_ARGOT	0.332442	0.388419	6508	proteolysis
g_128	BP_ARGOT	0.0315597	0.330495	9987	cellular process
g_129	original_DE	euk	n.d.	-13.2	g_129
g_129	qseq	n.d.	n.d.	n.d.	MPPAPPRPPGALPPAVPPARRHRVPTTTRLPSRTFHSYLPRSHRTYSCVHCRAHLARHEELISKSFQGSHGRAYLFNSVVNVGCGPAEQRLLLTGLHSVADIFCESCKTTLGWKYEQAFESSQKYKEGKFIIEMSHMVKENGWDX
g_129	DE	0.804585	0.414837	0.615385	Yippee like 4
g_130	original_DE	euk	n.d.	-13.2	g_130
g_130	qseq	n.d.	n.d.	n.d.	MADDGGDEKKQVAKFELERETELRFEVEASQTVQMELLTGMAEVFGTELTRNKKFTFDAGAKVAVFTWHGCTVQLSGRTEVAYVSKDTPMLLYLNTHTALEQMRRQAEREDERGPRVMVVGPTDVGKSTVCRLLLNYAVRLGRRPTFVELDVGQGSVSIPGTMGALYIERPADVEEGFSLQAPLVYHFGSTTPGTNIKLYNKITSRLADVFNQRCEVNRRASVSGCVINTCGWVKGSGYQALVHAASAFEVDVVVVLDQERLYNELKRDLPHFVRTVLLPKSGGVVERSKDFRRECRDDRIREYFYGFRGCFYPHAFDVKFSDVKIYKVGAPTIPDSCLPLGMSQEDNQLKLVPVTPGRDMVHHLLSVSMADSPDDNISETSVAGFIVVTGVDLERQVF…
g_130	DE	2.01574	0.850351	0.738095	Polyribonucleotide 5'-hydroxyl-kinase Clp1
g_130	GN	n.d.	n.d.	n.d.	CLP1
g_130	MF_ARGOT	13.1878	0.831994	51731	polynucleotide 5'-hydroxyl-kinase activity
g_130	BP_ARGOT	11.6617	0.800547	6388	tRNA splicing, via endonucleolytic cleavage and ligation
g_130	CC_ARGOT	11.2778	0.792316	5849	mRNA cleavage factor complex
g_130	BP_ARGOT	11.1102	0.788679	31124	mRNA 3'-end processing
g_130	CC_ARGOT	3.43904	0.573968	214	tRNA-intron endonuclease complex
g_130	MF_ARGOT	3.05184	0.558358	5524	ATP binding
g_130	BP_ARGOT	4.10286	0.59881	70922	RISC complex assembly
g_130	CC_ARGOT	0.488157	0.406149	5654	nucleoplasm
g_130	CC_ARGOT	0.256253	0.378202	5829	cytosol
g_130	BP_ARGOT	1.20061	0.463799	98795	global gene silencing by mRNA cleavage
g_130	BP_ARGOT	1.09306	0.456506	21695	cerebellar cortex development
g_131	original_DE	bac	n.d.	-13.2	g_131
g_131	qseq	n.d.	n.d.	n.d.	MRAATSFFAHARRALPRSFQAVPQAATNEERRAVRAADGAGRAGAAVTSCPAAERRDRFVPVVGPRSPGCALPRYRLRAHACRLSAQPLPGAWSPAGLRPPPRCSRPCPLPAAVARNGEAGAASSWARAERX
g_132	original_DE	euk	n.d.	-13.2	g_132
g_132	qseq	n.d.	n.d.	n.d.	MPAASGKRFKPSKYVPVSAAAIFLVGATTLFFAFTCPWLSLYVSPVIPIYNAVVFLFVLANFSMATFMDPGIFPRAEEDEDKEDDFRAPLYKTVEIKGIQVRMKWCATCRFYRPPRCSHCSVCDNCVEEFDHHCPWVNNCIGRRNYRYFFLFLLSLTTHIMGVFGFGLLYVLYQAELSGVRMAVTMAVMCVASLFFIPVAGLTGFHVVLVARGRTTNEQVTGKFRGGVNPFTNGCCKNVSRVLCSSPAPRYLGRPRAEQTVLVRPPFLRPEVSDGQITVKIMDNGIQTELKRTKVRKGGISTLHVGVLHGAQGCKPASSKGSLEVTESQSADAEPPPPPKPDLSRYTGLRTHLTLATNEDSSLLGKDSPPTPTMYKYRPGYSSSSSSAALPHSTSAKLS…
g_132	DE	1.2417	0.609049	0.516129	Palmitoyltransferase (Fragment)
g_132	GN	n.d.	n.d.	n.d.	ZDHHC5
g_132	MF_ARGOT	10.9547	0.785281	16409	palmitoyltransferase activity
g_132	CC_ARGOT	2.54971	0.536553	5886	plasma membrane
g_132	BP_ARGOT	0.202233	0.369997	1905171	positive regulation of protein localization to phagocytic vesicle
g_132	MF_ARGOT	9.06682	0.741914	19707	protein-cysteine S-acyltransferase activity
g_132	BP_ARGOT	0.201371	0.369858	140639	positive regulation of pyroptotic inflammatory response
g_132	BP_ARGOT	0.171962	0.364912	1900227	positive regulation of NLRP3 inflammasome complex assembly
g_132	CC_ARGOT	0.118194	0.354619	98978	glutamatergic synapse
g_132	CC_ARGOT	0.106641	0.352116	45335	phagocytic vesicle
g_132	CC_ARGOT	0.0938809	0.349189	30425	dendrite
g_132	BP_ARGOT	0.144695	0.359932	1903078	positive regulation of protein localization to plasma membrane
g_132	CC_ARGOT	0.087961	0.347764	98794	postsynapse
g_132	CC_ARGOT	0.0696892	0.343031	5654	nucleoplasm
g_132	BP_ARGOT	0.105094	0.351771	72659	protein localization to plasma membrane
g_133	original_DE	euk	n.d.	-13.2	g_133
g_133	qseq	n.d.	n.d.	n.d.	MENFSALFGGAEPPPATAAAALGFGPAKAAGSGAAPPPAAAVPPPGEDAARKAAAGPFYLLRELPGSTELTGSTNLITHYNLEHAYNKFCGKKVKEKLSNFLPDLPGMIDLPGSHDNSSLRSLIEKPPICGSSFTPLTGTMLTGFRLHAGPLPEQCRLMHIQPPKKKNKHKHKQSRTQDPVPPETPSDSDHKKKKKKKEEDPERKRKKKEKKKKKNRHSPEHPGVGSSQASSSSSLRX
g_133	DE	1.66788	0.758134	0.707692	Mediator of RNA polymerase II transcription subunit 19 (Fragment)
g_133	GN	n.d.	n.d.	n.d.	MED19
g_133	CC_ARGOT	10.1388	0.767039	16592	mediator complex
g_133	MF_ARGOT	8.37282	0.724848	3712	transcription coregulator activity
g_133	BP_ARGOT	7.81209	0.710536	45944	positive regulation of transcription by RNA polymerase II
g_134	original_DE	euk	n.d.	-13.2	g_134
g_134	qseq	n.d.	n.d.	n.d.	MAVLAPLLALLYSVPGLCRWLARPYYPLSALLATAFLLVRKVPPLCRGLPSQREDGNPCDFDWREVEILMFLSAIVMMKNRRSITVEQHIGNIFMFSKVANAILFFRLDIRMGLLYLTLCIVFLMTCKPPLYMGPEYIKYFSDKTIDEELERDKRVTWIVEFFANWSNECQSFAPIFADLSLKYNCSGLHFGKVDVGRYTDVSTRYKVSTSPLTKQLPTLILFQGGTEIMRRPQIDKKGRAVSWTFSEENVIREFNLNELYQKAKKQSKPRDEGSEEPPEGQAAAGLANGETKKEKX
g_134	DE	0.734972	0.380047	0.651163	Thioredoxin related transmembrane protein 2
g_134	GN	n.d.	n.d.	n.d.	TMX2
g_134	BP_ARGOT	10.4873	0.774918	7420	brain development
g_134	MF_ARGOT	8.35913	0.724505	15036	disulfide oxidoreductase activity
g_134	CC_ARGOT	6.6915	0.680302	5789	endoplasmic reticulum membrane
g_134	MF_ARGOT	0.265394	0.379502	42802	identical protein binding
g_134	CC_ARGOT	5.11843	0.6332	31966	mitochondrial membrane
g_134	CC_ARGOT	0.421745	0.398996	44233	mitochondria-associated endoplasmic reticulum membrane contact site
g_135	original_DE	euk	n.d.	-13.2	g_135
g_135	qseq	n.d.	n.d.	n.d.	MALRGRKRAARRPAEPEVQADPPEKRPRGKAEGTPGDTGGPRVVIEHCEALREAVATLSVEINPRQPRRNSFEVSLVKEDGSTVELWSGIGKGPPRKLKFPEPAAVVEALRSSLAX
g_135	DE	1.43583	0.68189	0.8	Selenoprotein H
g_135	GN	n.d.	n.d.	n.d.	SELENOH
g_135	CC_ARGOT	6.47286	0.674115	5794	Golgi apparatus
g_136	original_DE	euk	n.d.	-13.2	g_136
g_136	qseq	n.d.	n.d.	n.d.	MPAGCPPAAPRLQYRSSRLLRAAFLRLHQQQQRADVFCDVLLRAEGEVVAAHCCVLSVWSPFFMERLARQLPPAGCRVVLELEGLKIATLRKVVRFLYTAELEASREEVRDVLAAARRLRVAVLESLQLWEDGLLRPGPRWQLDRSCLHDPGSGGVPLVDAPREQPLPPETVGPAHPVGRLKLRRMEGRRGWEVVRDRQFSLEPVAVEARRGTEPWLQPAAAGLAEDDLEEEVDVGIAEPCLPPGTVCACPSPSSESGGEVDVLGX
g_137	original_DE	bac	n.d.	-13.2	g_137
g_137	qseq	n.d.	n.d.	n.d.	MRTAGATTRACASALPHVRASRRAFSLRRVLPSNSSAIRSTPDQSQRGGNFVGKVAREVLVAAEEARTPSLHPGFSQVSGASSRSEDGRFPGTAGTESQQLRLSRDGSSGWGNAALGRPEAFPGGMPTGLCRGPPPRAAPSVLLRPSPPARPPLPRQAPLRATAIGRSAPTPGAVRERCGAHGAAVAKSGPTLSGPACAAFARPGRPLLRAAPWRGSSCLEPFAPPLLSCRSGPGGRGAGPPPVPEEPGRAQFSRVLLLVCAFVLAGGDSGGWGGSGAGRVRQFPSSRRLRSAARLCSHNNEKRRAVQPRADKWHGAAAERGRPYCSLVRALQAAPQFLSAGRLVPLCERALTFRGAAPRSAAEWRLNLGX
g_138	original_DE	euk	n.d.	-13.2	g_138
g_138	qseq	n.d.	n.d.	n.d.	MDDSEVESTASILASVKEQEAQFEKLTRALEEERRHVSAQLERVRVSPQDAGPGLANGTLSRRHQNGRFLGDADLERQKFPDLKLNGPQDHSHLLYSTIPRMQDPGQIVEETYTMEEDPEGAMSVVSVETSDDGTTRRTETTVKKVVKTVTTRTVQQVPMGPDGLPLETSPVTSNYVQTMDRNFRKNGNGGPGSYLSQPGTATLPRNYHYPDGYGRPYDDSYPGSDHSYGSLSRVTRIDERYRPSMDAYRAPSRQDIYGPQPQVRVGGSNMDLNHFHPESYGLEDDQRSVGFDDVDYGLMSDYGTARRAGTPSDARRRLRSYEDMLVDEVAPDRYYWAPLAQHERGSLASLDSLRKGAPAPGNWRQPELPEVIAMLSFRLDAVKSNAAAYLQHLCYRND…
g_138	DE	2.00859	0.848722	0.666667	Catenin delta 1
g_138	GN	n.d.	n.d.	n.d.	CTNND1
g_138	CC_ARGOT	9.97522	0.763293	5912	adherens junction
g_138	BP_ARGOT	8.46845	0.727241	98609	cell-cell adhesion
g_138	MF_ARGOT	0.883661	0.441193	140311	protein sequestering activity
g_138	BP_ARGOT	1.12057	0.458404	150107	positive regulation of protein localization to cell-cell junction
g_138	MF_ARGOT	0.59221	0.416439	45296	cadherin binding
g_138	CC_ARGOT	3.40183	0.572508	5634	nucleus
g_138	MF_ARGOT	0.399857	0.396516	5102	signaling receptor binding
g_138	CC_ARGOT	2.49677	0.534133	5886	plasma membrane
g_138	BP_ARGOT	0.6478	0.421566	99072	regulation of postsynaptic membrane neurotransmitter receptor levels
g_138	BP_ARGOT	0.613884	0.418465	90090	negative regulation of canonical Wnt signaling pathway
g_138	BP_ARGOT	0.558377	0.4132	50821	protein stabilization
g_138	CC_ARGOT	1.50646	0.482916	5737	cytoplasm
g_138	CC_ARGOT	0.599978	0.417169	30496	midbody
g_138	CC_ARGOT	0.472114	0.404468	19898	extrinsic component of membrane
g_138	CC_ARGOT	0.433824	0.400336	9986	cell surface
g_138	CC_ARGOT	0.246792	0.376833	98796	membrane protein complex
g_139	original_DE	euk	n.d.	-13.2	g_139
g_139	qseq	n.d.	n.d.	n.d.	MSCHEGGKLKVGERALSSVRIPPLWGTGSTKDALLAELEQSSQPAPTNRMLLTPSTRQQEAPPGKPPAPSSQKPLASTAPKVPLPPRAQPSGKSLETVYSSPMPTPQPLPASPEPTAAARQLDELLADLGQMQSKLAAVGQGAGAPVGPEHSLDHMLGGLTRDLQELGITAAPAAVCAACHKPIAGKMFTALGEAWHPEHFTCARCGQELGGRPFFERGGRAYCEEDYHQAFSPRCAYCAGPIRERVLTAMDQTWHPEHFFCAHCGKVFGEDGFHERGGKPYCFQDFVVLFAPKCQGCERPLTDNYLSALQGVWHPECFVCADCLSSFTNGSFFELEGRPYCELHFHQRQGSVCHGCGHPITGRCITAAGRKYHPEHFICAYCLSQLHKGTFREQGDKM…
g_139	DE	3.34999	0.968076	0.347826	LPXN protein (Fragment)
g_139	GN	n.d.	n.d.	n.d.	LPXN
g_139	CC_ARGOT	8.20413	0.720594	70161	anchoring junction
g_139	BP_ARGOT	7.76518	0.709315	50859	negative regulation of B cell receptor signaling pathway
g_139	MF_ARGOT	7.40961	0.699943	51371	muscle alpha-actinin binding
g_139	CC_ARGOT	6.81378	0.683719	31941	filamentous actin
g_139	CC_ARGOT	6.31504	0.669584	97517	contractile actin filament bundle
g_139	MF_ARGOT	4.298	0.605723	3779	actin binding
g_139	BP_ARGOT	5.79231	0.654156	43542	endothelial cell migration
g_139	CC_ARGOT	6.28049	0.668584	42641	actomyosin
g_139	BP_ARGOT	5.46911	0.644267	61061	muscle structure development
g_139	MF_ARGOT	2.47637	0.533194	46872	metal ion binding
g_139	BP_ARGOT	5.40306	0.64221	34446	substrate adhesion-dependent cell spreading
g_139	CC_ARGOT	5.92947	0.658269	30018	Z disc
g_139	BP_ARGOT	5.15023	0.634219	7507	heart development
g_139	BP_ARGOT	5.07013	0.631646	7179	transforming growth factor beta receptor signaling pathway
g_139	MF_ARGOT	0.405929	0.397211	3712	transcription coregulator activity
g_139	BP_ARGOT	4.3873	0.608834	30036	actin cytoskeleton organization
g_139	CC_ARGOT	0.641145	0.420964	2102	podosome
g_139	CC_ARGOT	0.506104	0.407997	16607	nuclear speck
g_139	CC_ARGOT	0.175308	0.365495	5829	cytosol
g_139	CC_ARGOT	0.123613	0.35575	5886	plasma membrane
g_139	CC_ARGOT	0.121433	0.355298	16363	nuclear matrix
g_139	BP_ARGOT	0.707552	0.426837	33628	regulation of cell adhesion mediated by integrin
g_139	BP_ARGOT	0.579175	0.415202	7162	negative regulation of cell adhesion
g_139	BP_ARGOT	0.0892144	0.348069	16055	Wnt signaling pathway
g_140	original_DE	euk	n.d.	-13.2	g_140
g_140	qseq	n.d.	n.d.	n.d.	MSAGRRGGQPAAPSVPRDHFRPSSIGAPLDYNSRRAERMRGHPTEVGGAPRAGPAPLAPAAILSPTFTRRPTGRSDRAGRGARERFLLPDPARRARGLGGSRRGAGSGGGRKPGEGRRAGRRQPGRAGGRVGRVTGRRSGSRRGRARAGGAAGQAGGGGGERWRRERESGRACAGSRTSIGRAAAWGWALPQLEX
g_141	original_DE	euk	n.d.	-13.2	g_141
g_141	qseq	n.d.	n.d.	n.d.	MPAGTEQPAGAEQQQEQEQQQQQPAQSPPPAAERPPPPSGRRRPSAAATAEQGEESGGGRVLRGGRERGRAAGGAAASRRRKAEYPRRRRSSPGARPAATEQPAAETPPVARKGAPRAGCTDKASGKDPKEEKEEEEVSPALSQGSPVSTARPSRSWRSSRSATATRQREAENSRASRSKTGSLQLICKSEPNSDQLEYEVTEEHQSPAGISDDEEEILASEEEVPFKDDPRDETYKPHLEKEAPKQRRKAGKGKEEKEKQKEIKVEVKEESEFREDEEPPRKRGRRRKDDKSPRLPKRRKKPPIQYVRCEMEGCGTVLAHPRYLQHHIKYQHLLKKKYVCPHPSCGRLFRLQKQLLRHAKHHTDQRDYICEYCARAFKSSHNLAVHRMIHTGEKPLQC…
g_141	DE	4.91706	0.968076	0.484848	E3 ubiquitin-protein ligase ZFP91
g_141	GN	n.d.	n.d.	n.d.	ZFP91
g_141	MF_ARGOT	6.1842	0.665784	3712	transcription coregulator activity
g_141	BP_ARGOT	5.67271	0.650529	6357	regulation of transcription by RNA polymerase II
g_141	CC_ARGOT	3.47395	0.575332	5634	nucleus
g_141	MF_ARGOT	2.47638	0.533194	46872	metal ion binding
g_141	MF_ARGOT	1.70408	0.494245	16874	ligase activity
g_141	EC_ARGOT	1.70408	0.494245	EC:6.-.-.-	GO:0016874
g_141	MF_ARGOT	0.869476	0.440093	4842	ubiquitin-protein transferase activity
g_141	KEGG_ARGOT	0.869476	0.440093	KEGG:R03876	GO:0004842
g_141	CC_ARGOT	0.617365	0.418787	70013	intracellular organelle lumen
g_141	CC_ARGOT	0.304712	0.384851	43232	intracellular non-membrane-bounded organelle
g_141	BP_ARGOT	1.359	0.473969	70534	protein K63-linked ubiquitination
g_141	BP_ARGOT	0.0456341	0.335718	9987	cellular process
g_142	original_DE	euk	n.d.	-13.2	g_142
g_142	qseq	n.d.	n.d.	n.d.	MAAADTPSATLRHHDLCSRSIRLARKMRSDVADLLDIYVERQGLDASISVAAVDGVPAAAAERWAEQTGTQRLLDNLAAYRAFRTLLAQMLEEQREQLGDADAELGPALAAVLLQVTAFTYHLEELLELESHGAPAEEGSEPPAPPRLSLFEQKLRGLGVLRELAQWAVRSVRDLRQLAKHGPGSGAALGLPESQX
g_142	DE	2.54463	0.939806	0.605263	Ciliary neurotrophic factor (Fragment)
g_142	GN	n.d.	n.d.	n.d.	CNTF
g_142	BP_ARGOT	17.5892	0.865564	48680	positive regulation of axon regeneration
g_142	MF_ARGOT	16.2849	0.858288	5127	ciliary neurotrophic factor receptor binding
g_142	CC_ARGOT	9.00487	0.740418	30424	axon
g_142	BP_ARGOT	17.5517	0.865359	48143	astrocyte activation
g_142	MF_ARGOT	10.29	0.770472	8083	growth factor activity
g_142	CC_ARGOT	6.84509	0.684588	5615	extracellular space
g_142	MF_ARGOT	10.1507	0.76731	5125	cytokine activity
g_142	BP_ARGOT	15.8647	0.855882	70120	ciliary neurotrophic factor-mediated signaling pathway
g_142	CC_ARGOT	1.53837	0.484793	5737	cytoplasm
g_142	CC_ARGOT	0.202791	0.370087	97386	glial cell projection
g_142	CC_ARGOT	0.122016	0.35542	43025	neuronal cell body
g_142	MF_ARGOT	0.969631	0.447678	5138	interleukin-6 receptor binding
g_142	BP_ARGOT	12.873	0.825663	43524	negative regulation of neuron apoptotic process
g_142	MF_ARGOT	0.395683	0.396036	44877	protein-containing complex binding
g_142	BP_ARGOT	1.04907	0.45342	46533	negative regulation of photoreceptor cell differentiation
g_142	BP_ARGOT	1.04809	0.453351	46668	regulation of retinal cell programmed cell death
g_142	BP_ARGOT	0.933721	0.445006	60221	retinal rod cell differentiation
g_142	BP_ARGOT	0.854459	0.438918	48644	muscle organ morphogenesis
g_142	BP_ARGOT	0.785126	0.433358	97696	cell surface receptor signaling pathway via STAT
g_142	BP_ARGOT	0.590001	0.41623	8284	positive regulation of cell population proliferation
g_142	BP_ARGOT	0.504828	0.407866	48666	neuron development
g_142	BP_ARGOT	0.48024	0.405323	10628	positive regulation of gene expression
g_143	original_DE	bac	n.d.	-13.2	g_143
g_143	qseq	n.d.	n.d.	n.d.	MLRGALALPAPGPPGAAQRRAGLQRLSPGERPAAAAGGGGGRLRIAAPAHRAPPAPRGPGRERARGGGAPNPLRAGAPGEATPPPRGHAPIRVPPPERVPRRPSSATX
g_144	original_DE	euk	n.d.	-13.2	g_144
g_144	qseq	n.d.	n.d.	n.d.	MLLASAVVVWEWLNEHGRWRPYSPAVSHHIEAVARAGPRAGGSVVLGQADSRLAPYIIDLQSMHQFRQDTGTIRPVRRSYYDPSSAPGKGVVWEWENDSGSWTPYDMDVGITIQRAYEKQHPWVDLSTIGFCYVIDFATMGQINRQTQRKRRVRRRLDMVYPLVSGTLPKSQSWPASPGVAAAPSAPACACPQCLLVMSVKAAVSAGGLGAATLQPRKAPPAPPVAPKAPGAKVPDGTATARGSLKPLGAQGVRQQAASTPALGPAGPAPSPPGVGGSKAARPGLGTLNRSHLQRLAIAQSRVLIASGVPTVPVKNLNGSSPVNPALAGITGILMSAAGLPVCLTRPPKLVLHPPPVSKSEIQSIPGISHTCRKTTKKQAKKGKAPEEVLKKYLQKVRH…
g_144	DE	0.962347	0.489755	0.447368	E3 ubiquitin-protein ligase (Fragment)
g_144	GN	n.d.	n.d.	n.d.	DTX4
g_144	BP_ARGOT	10.981	0.785858	7219	Notch signaling pathway
g_144	MF_ARGOT	8.4209	0.726053	61630	ubiquitin protein ligase activity
g_144	CC_ARGOT	1.53841	0.484795	5737	cytoplasm
g_144	BP_ARGOT	7.38336	0.699242	16567	protein ubiquitination
g_144	CC_ARGOT	0.697134	0.425934	5813	centrosome
g_144	MF_ARGOT	5.0738	0.631764	8270	zinc ion binding
g_144	MF_ARGOT	2.72675	0.544467	16874	ligase activity
g_144	EC_ARGOT	2.72675	0.544467	EC:6.-.-.-	GO:0016874
g_144	CC_ARGOT	0.07944	0.345625	5654	nucleoplasm
g_144	BP_ARGOT	1.12294	0.458567	45824	negative regulation of innate immune response
g_144	BP_ARGOT	0.654997	0.422213	43161	proteasome-mediated ubiquitin-dependent protein catabolic process
g_145	original_DE	euk	n.d.	-13.2	g_145
g_145	qseq	n.d.	n.d.	n.d.	MVWVLRVVLLAQVLATAAAEVERPQEPLSSVGFQDCKKALKLPSLEVLPGGGWDNLRNLDMGRVIDLSYSLCKTTEDGSYIIPDDIFTIPRKQSNLDINSEIIESWKDYKSITSASINLELSLFSAVNGKFSYDFQQAKTHQVQDKAITTRVQVRNLVYTAKIDPGARLDKGFKKQLLTIASHLENNQTRMADFLSEVLVLNYGTHTITSMDAGASLVQEDQIKATFLKDSWAMRSSITASAAVAFHNIVNVKTEESQGTSSAFTKQYLENRTNSRVESIGGTPFYPGITLKTWQEGISNQLVAIDRSGLPLYFFISPSTLPELPSPTVKKLAKRVEMAIRRYYTFNTYPGCTDAASPNFNFHANADDGSCAGTMTNFTFGGAFQECTGLAGPDTNELC…
g_145	DE	2.51143	0.935992	0.630435	Macrophage-expressed gene 1 protein (Fragment)
g_145	GN	n.d.	n.d.	n.d.	MPEG1
g_145	CC_ARGOT	10.9983	0.786237	30670	phagocytic vesicle membrane
g_145	BP_ARGOT	10.1662	0.767663	2250	adaptive immune response
g_145	MF_ARGOT	0.414996	0.398238	22829	wide pore channel activity
g_145	BP_ARGOT	9.7463	0.758001	45087	innate immune response
g_145	BP_ARGOT	8.04629	0.716574	42742	defense response to bacterium
g_145	BP_ARGOT	0.122962	0.355616	55085	transmembrane transport
g_145	CC_ARGOT	0.693164	0.425588	32010	phagolysosome
g_145	CC_ARGOT	0.427993	0.399691	5765	lysosomal membrane
g_146	original_DE	euk	n.d.	-13.2	g_146
g_146	qseq	n.d.	n.d.	n.d.	MRGTMVPARALGLLLSVQLCMGSEELRLVDGGGRCAGRVEVKHEGEWGSVCSYNIQWDRDEAGVVCRQLGCGTVAHTSPYAPFGQGKGRIWLHLFFCDGTEATLQDCSHFGWGNHFCGHEWDVGVICSEALELRLADGGGPCEGRVEAKLRGRWGTVADNDWNMNDAEVVCQQLGCGSAAHTRYTWRNSQVHNPLMLAFIDCKGNEKAIWDCNIEGWGPYNLPRDYNASVVCQGFSRLVGGDSECSGRLEVRQGQAWVSVCHGHVDLMAAQVVCRELGCGTALALYGTGQLGKAAGPFWDGAFNCNGTELLLSACTQQPPHIQNCTQPTAIFCSPYTGFRLVDGGSACAGRVEVEARGVWGPLCASAWDLPDAHVLCHHLGCGSATSIPPPGHFGMGTG…
g_146	DE	0.872071	0.447551	0.819444	Soluble scavenger receptor cysteine-rich domain-containing protein SSC5D
g_146	CC_ARGOT	1.2289	0.465662	5576	extracellular region
g_146	CC_ARGOT	0.921497	0.444084	16020	membrane
g_147	original_DE	euk	n.d.	-13.2	g_147
g_147	qseq	n.d.	n.d.	n.d.	MRGTMVPARALGLLLSVQLCMGNEELRLVDGGGRCAGRVEVKHEGEWGSVCSYNIQWDTDEASVVCRQLGCGTVAHTSPYAPFGQGKGRIWLHLFFCDGTEATLQDCSHFGWGNHFCGHEWDVGVICSEALELRLADGGGPCEGRVEAKLRGRWGTVHSNEWNMNHAEVVCQQLGCGSAAHTTFTWQTLQVHSTLLLVRVKCKGNEKAIWDCNIEGWGPYNVTRDYNAFVVCQGFSRLVGGDSECSGRLEVRQGQAWVSVCHGHVDLMAAQVVCRELGCGTALALYGTGQLGKAAGPFWDGAFNCNGTELLLSACTQQPPHIQNCTQPTAIFCSPYTGFRLVDGGSACAGRVEVEARGVWGPLCASAWDLPDAHVLCHHLGCGSATSIPPPGHFGMGTG…
g_147	DE	0.869721	0.446429	0.819444	Soluble scavenger receptor cysteine-rich domain-containing protein SSC5D
g_147	CC_ARGOT	1.21824	0.464963	5576	extracellular region
g_147	CC_ARGOT	0.921496	0.444084	16020	membrane
g_148	original_DE	bac	n.d.	-13.2	g_148
g_148	qseq	n.d.	n.d.	n.d.	MSRTGCIPRHGDPVSTPTTAAVAGLSGCYGDSTETPAPPGKAAGLSCPCPCPRVQPGAGEGGSVRWVRGRFQKRNPACTQGWDMGQRPAPLQGQCVVAQLSGHRGLLGTWLRGQPPGEGAGMQGVGQGCQQGLGIASALLCSCCRAPALPCSQESTNTASQRAREGPRRQQQPRSRAQQGRAYSSASSTRRHCSTALHTAEGPRRKAWPARVGRALPARRPPFLLAAAHSGGTEQMGKDSPFQDFSX
g_149	original_DE	bac	n.d.	-13.2	g_149
g_149	qseq	n.d.	n.d.	n.d.	MSAPPRGGGRGRGLRALPAGLLPARRDSAPARWRGPFPCGRCHGVLLPRAAVRSRRCQGCKVTVRRPRSSCSQALPRLCLRSPPSRRGWGGVRCPLTDAVPVALRTREHVCLFPKSSVQLFNFGGKCSSCLLX
g_150	original_DE	euk	n.d.	-13.2	g_150
g_150	qseq	n.d.	n.d.	n.d.	MATPPSQVRQNYHQDCEAAINRQINLELYASYVYLSMSYYFDRDDVALKNFAKYFLHQSHEEREHAEKLMKLQNQRGGRIFLQDIKKPDRDDWENGLTAMECALHLEKNVNQSLLELHKLATEKNDPHLCDFIETHYLDEQVKAIKQLGDHVTNLRKMGAPKYGMAEYLFDKHTLGECDNSX
g_150	DE	1.15187	0.572552	0.625	Ferritin
g_150	GN	n.d.	n.d.	n.d.	FTH
g_150	BP_ARGOT	11.1622	0.789812	6880	intracellular sequestering of iron ion
g_150	MF_ARGOT	10.0804	0.765706	8198	ferrous iron binding
g_150	CC_ARGOT	1.53838	0.484794	5737	cytoplasm
g_150	MF_ARGOT	10.0726	0.765527	8199	ferric iron binding
g_150	BP_ARGOT	7.66966	0.706819	6826	iron ion transport
g_150	MF_ARGOT	1.03089	0.452126	140315	iron ion sequestering activity
g_150	CC_ARGOT	0.124444	0.355922	43231	intracellular membrane-bounded organelle
g_150	MF_ARGOT	0.624454	0.419441	4322	ferroxidase activity
g_150	EC_ARGOT	0.624454	0.419441	EC:1.16.3.1	GO:0004322
g_150	MF_ARGOT	0.437578	0.400749	42802	identical protein binding
g_150	CC_ARGOT	0.0650468	0.341732	31982	vesicle
g_150	CC_ARGOT	0.0478109	0.336449	16020	membrane
g_150	BP_ARGOT	0.994926	0.449531	110076	negative regulation of ferroptosis
g_150	BP_ARGOT	0.853581	0.438849	48147	negative regulation of fibroblast proliferation
g_150	BP_ARGOT	0.0824171	0.346385	6955	immune response
g_151	original_DE	euk	n.d.	-13.2	g_151
g_151	qseq	n.d.	n.d.	n.d.	MTVTYTNRVADARLGTFSQLLLQWKGSIYKLLYSEFLIFISLYFAISLVYRLILSESQRLMFEKLALYCNSYAELIPVSFVLGFYVALVVSRWWAQYESIPWPDRIMNLVSCNVDGEDEYGRLLRRTLMRYSNLCSVLILRSVSTAVYKRFPSMEHVVRAGLMTPEEHKKFESLNSPHNKFWIPCVWFSNLAVKARNEGRIRDSVLLQGILNELNTLRSQCGRLYGYDWISIPLVYTQVVTVAVYSFFLACLIGRQFLDPEKAYPGHELDLFVPVFTFLQFFFYAGWLKVAEQLINPFGEDDDDFETNWLIDRNLQVSLMAVDEMHQDLPILEKDLYWNEPDPQPPYTAATAEYKRPSFLGSTFDISMQKEEMEFQPLEQIKENEEANHSTPLLGHLGR…
g_151	DE	1.18049	0.584372	0.37931	Bestrophin homolog (Fragment)
g_151	GN	n.d.	n.d.	n.d.	BEST1
g_151	CC_ARGOT	11.0684	0.787768	34707	chloride channel complex
g_151	MF_ARGOT	9.81974	0.759705	5254	chloride channel activity
g_151	BP_ARGOT	9.24501	0.746189	1902476	chloride transmembrane transport
g_151	CC_ARGOT	2.54968	0.536551	5886	plasma membrane
g_151	CC_ARGOT	0.940561	0.445519	98857	membrane microdomain
g_151	MF_ARGOT	1.73693	0.496063	160133	bicarbonate channel activity
g_151	CC_ARGOT	0.890853	0.441747	45178	basal part of cell
g_151	BP_ARGOT	1.79455	0.499211	61534	gamma-aminobutyric acid secretion, neurotransmission
g_151	MF_ARGOT	1.25345	0.467263	141147	intracellularly calcium-gated channel activity
g_151	CC_ARGOT	0.773066	0.432366	98793	presynapse
g_151	BP_ARGOT	1.58487	0.487494	14047	glutamate secretion
g_151	BP_ARGOT	1.47089	0.480799	30321	transepithelial chloride transport
g_151	MF_ARGOT	1.09608	0.456715	99095	ligand-gated monoatomic anion channel activity
g_151	BP_ARGOT	1.4427	0.479103	50908	detection of light stimulus involved in visual perception
g_151	MF_ARGOT	0.734515	0.429142	42802	identical protein binding
g_151	BP_ARGOT	1.11088	0.457738	51924	regulation of calcium ion transport
g_151	BP_ARGOT	1.07523	0.455263	15701	bicarbonate transport
g_151	BP_ARGOT	1.04813	0.453353	48167	regulation of synaptic plasticity
g_151	BP_ARGOT	0.761256	0.431387	51259	protein complex oligomerization
g_152	original_DE	euk	n.d.	-13.2	g_152
g_152	qseq	n.d.	n.d.	n.d.	MRRGQTRFEEDSQEKPAVGYWKPLMPSKGSKEEPETGCQDAGRGDDSQSTEQRNVSRLRSSSVEIREKGSEFLKEELHKAQKELKLKDKECERLSKVREQLEQELEELTASLFEEAHKMVREANTKQAASEKQLKEAWGKVLLITSSSX
g_152	CC_ARGOT	15.0094	0.850885	70319	Golgi to plasma membrane transport vesicle
g_152	BP_ARGOT	9.19541	0.745003	6887	exocytosis
g_152	MF_ARGOT	8.52722	0.728704	5085	guanyl-nucleotide exchange factor activity
g_153	original_DE	euk	n.d.	-13.2	g_153
g_153	qseq	n.d.	n.d.	n.d.	MGKGGEKGEESGECMPQVRSYTWEEIQKHNLRTDRWLVIERKVYNVTQWAHRHPGGQRVIGHCAGEDATDAFQAFHINPSLVQKFLKPLLIGELAPGEPSQDRDKNSQLVEDFRTLRKTAEDMDLFRASPLFFSLYLAHIIAMEALAWLMISYFGTGWITTLILACILTTSQAQAGWLQHDFGHLSVFKKSSWNHILHKFVIGHLKGASANWWNHRHFQHHAKPNIFKKDPDVNMLHIFVLGESQPIEYGKKKLKYLPYNHQHEYFFFIFPPLLIPVYFQIQIISTMIKRRFWADLAWAVSYYMRYFITYSPFYGILGSLCLLTFVRX
g_153	DE	1.35804	0.653692	0.782609	Fatty acid desaturase 2
g_153	GN	n.d.	n.d.	n.d.	FADS2
g_153	MF_ARGOT	10.7846	0.781536	16717	oxidoreductase activity, acting on paired donors, with oxidation of a pair of donors resulting in the reduction of molecular oxygen to two molecules of water
g_153	EC_ARGOT	10.7846	0.781536	EC:1.14.19.-	GO:0016717
g_153	BP_ARGOT	10.6972	0.7796	6636	unsaturated fatty acid biosynthetic process
g_153	CC_ARGOT	0.921538	0.444087	16020	membrane
g_153	CC_ARGOT	0.121364	0.355284	98827	endoplasmic reticulum subcompartment
g_153	MF_ARGOT	0.0441481	0.335209	16301	kinase activity
g_154	original_DE	euk	n.d.	-13.2	g_154
g_154	qseq	n.d.	n.d.	n.d.	MEERGAEPGMRRFTWEEIAQRTGRGPAAEERWLVIDRKVYDISRFHRRHPGGSRVISHYAGQDATDPFIAFHLDKTLVKKYMSPLLIGELAPDQPSFEPSKNKKLVEDFRELRATVEKMGLLKPNRTFFLLHLCHILVLDVAAWLTIWYFGSSIVPFLFSALLLGTVQAQAGWLQHDFGHLSVFSKSKWNHWVHKFVIGHLKGAPASWWNHLHFQHHAKPNCFRKDPDVNMHPLFFALGKKLSVELGEQKKKFMPYNHQHKYFFIIGPPALVPLYFQWYIFYFVVQRKQWVDLAWMLTFYIRFFLTYLPLLGVKGILGLHLLVRYHSTSNX
g_154	DE	2.47197	0.931144	0.782609	Fatty acid desaturase 1
g_154	GN	n.d.	n.d.	n.d.	FADS1
g_154	MF_ARGOT	10.4191	0.773387	16717	oxidoreductase activity, acting on paired donors, with oxidation of a pair of donors resulting in the reduction of molecular oxygen to two molecules of water
g_154	EC_ARGOT	10.4191	0.773387	EC:1.14.19.-	GO:0016717
g_154	BP_ARGOT	10.0073	0.764031	6636	unsaturated fatty acid biosynthetic process
g_154	CC_ARGOT	0.921538	0.444087	16020	membrane
g_154	MF_ARGOT	0.0228668	0.326657	16740	transferase activity
g_154	EC_ARGOT	0.0228668	0.326657	EC:2.-.-.-	GO:0016740
g_155	original_DE	euk	n.d.	-13.2	g_155
g_155	qseq	n.d.	n.d.	n.d.	MAPQHGDRKQDGNAAAEPVMRWFTWEEVAQRTGRGPALQERWVVIDRKVYDISHFYRRHPGGALLISSHAGQDVTLLX
g_156	original_DE	bac	n.d.	-13.2	g_156
g_156	qseq	n.d.	n.d.	n.d.	MGERAASAALAGCVRGAPAVPTRFLPASPRASARPVAGRQEPEPVSDGTCRSLSGRAEAWRAAAGPGAALRVDVGLQHSSRGRRSPTSAAGKSAPGGGQCVTYMRRARVGPGRSFGAFGTQLLPALCFGARRCAGRQRPLNLLLKCGALRSQVRRAGSSRSASGVIYSPAERGFVVLLAELPQGAPFLGREQRTVGADGPLALPARSAAAGPKARRMCCAGHGSLPPPVFSRVAVVAREPPGVRWRGAAAARPFPYFPTAVTWAGLARGGAPYRGLAHGGARGRAAPLRAPAVPGQSSDRAINTCPRPGX
g_157	original_DE	bac	n.d.	-13.2	g_157
g_157	qseq	n.d.	n.d.	n.d.	MLRLSTGNQPSSLTPPRLQPHPSHGTAAAVRTALRLGSARRRRSRRVPDRYRALRVRGNGRPARARLAPQGRRRAPHGRSYVLHGSTYRRYVLCGSLTVRX
g_158	original_DE	bac	n.d.	-13.2	g_158
g_158	qseq	n.d.	n.d.	n.d.	MIGRRGGGRGGLAGADMSAILERRYVGYSGAAAFLRQSSGGRAPRSGPFRGGVGLAPSPSARGLRALLGRRGVGARWDCVAWRVLAIAPRVWSPVLGSCGAAGVGCCRPGRGGEGPGPRPRALRWGSELLGARGGAVLVWSSLWAPSAAGWGGTGDCAVRCCALRAGQVLWGNRLLLPAASSHLCGYRLQNFSLVSRX
g_159	original_DE	bac	n.d.	-13.2	g_159
g_159	qseq	n.d.	n.d.	n.d.	MQRRQSHGLSWFVRLPAAAWEVELVFQGGAGALNHSGSWRLSPGTCAEGFASPCRLRDAAAAVAAGFVARCEKACLAPAGGVTAVQNEEGWLLCTESGCAELNALCQPHPAPSARPALVVRQFGARAAPRGAWLCAPANVEERGARPKGERHQRPLPPRPPAGSERLGSGLDRESLLFFKRPPLFRLGNGNACHGDVPLLLSREGGKRDAPFSCADWLAGNRRPAPIPAX
g_160	original_DE	euk	n.d.	-13.2	g_160
g_160	qseq	n.d.	n.d.	n.d.	MTALITAAASESRPGKRRSEAQRPAGAPHVRRAAPRSPAPARRPRPSDGARPREGGASPFPHPPPQPRRASDSARERHPTPAPPNPAEIRDRGSAARGRGWGNAHTTFVSLLQPDAATESPPPQPGPRGKQPREEGTGGLCVRRGPPRRAVGAHAPPPRPPAAAPGEPRSARPVHVRVSPRRSSGEVSPNSANKRGRSSLRRSPPPPLPLPEALTPGRARLAAQHRGGQEPQQQQQRERRRRLHVVPQQQLPERSPPIVSGRFHARGAALGGEGGGKREAPRPALLLLLPPPPPAPASLKGAGILPLAPRPGEEPCGRTGPRCAPGGERRFCSGPGCSRSLETFVSX
g_161	original_DE	euk	n.d.	-13.2	g_161
g_161	qseq	n.d.	n.d.	n.d.	MPRGQLTPLPPQVGDGLWGNRRNRWVALGSHTGQREATKKAPSLPSSPRTQLGLCARSKRTNPWQQPATRAQRPEVAPSPPRKQGRISPDHPSSSPLPTHVASPPAPHDEHPTPALPSGPTAARGSVPQAQEPGTGPEETLTPAEAATFPTPARPPGEGPQPRAAAPRHMPRPRPAPLPHLPPPLSSSHWPAGLQPRPLRPRPRPFPSHAPSGRGGVEPPGAQAERLTPEIRSGEPRACGSDVGRGVADERVLPAPGLCASSVAVYSRHCDMARAQLPLSX
g_162	original_DE	bac	n.d.	-13.2	g_162
g_162	qseq	n.d.	n.d.	n.d.	MTQLLHRGAAPGTHPVSAHRSTARGESSPRSPQATPQRSQRISLSRAGQPRAEGSRQHAAGRHFLLSVHRRAAGRPGPRFLQGNPYATPSGHGRCGPRCPSAAGEARKQAESRPAPPPARVRGRWGAVRLEEGGRLGFFSSCVSFRTAGTRGWSCGVPPPPAAQGQAAPLRRGARRSRLRGRERKKLRSAVAGATDRPAQKPCRKRPSTQKEKNEQEEEAAAATAGPHRRPAGSLRGSPGDSFSRGPAEGSLGGSLHRLPPAPLAPRRRHLGFX
g_163	original_DE	bac	n.d.	-13.2	g_163
g_163	qseq	n.d.	n.d.	n.d.	MASAAPAGTCEGKVWPQLWVAASSIAIRALTRGFYVLNEKLRHRGEKKESAASVVLRPLCKHEAVLKAVLQLLAARGGGRAAFLTFAFAPFAVRFLLSRRTAAYMRPX
g_164	original_DE	bac	n.d.	-13.2	g_164
g_164	qseq	n.d.	n.d.	n.d.	MSRALPPGPLLIGKAARGPAHLTLFPSALIGSLRPLIGARPPGRKKGRARGALIGRSSVALVTGARSPGWEGGVSARGVGNGARLGAAEVRRGERCPRTEGPGVCRDFPSAPYDVDYGHRGRLFNGLLFTARCRLAESAAVCRDX
g_165	original_DE	euk	n.d.	-13.2	g_165
g_165	qseq	n.d.	n.d.	n.d.	MKTKFCNGEADPSPLGLLLGCSPGSGGGGGVLPAAGQPPSPLSHGGPEGKDPAAAGRGGGTVSPASPVPPPPEEEPPLDPRTRRRAYLWCKEFLPGAWRGLREEQLRISPIRSVRAEGRGRLPGNRALPLLLAVSFPFPRFFSLLSFRNPLGWGGRVGLGLVRRHRLCPX
g_165	DE	0.648794	0.235982	0.85	Choline kinase alpha
g_166	original_DE	euk	n.d.	-13.2	g_166
g_166	qseq	n.d.	n.d.	n.d.	MQNSSITLRLHSLQLPFSSTWKYGILALAILLLLGALTILAYQICQLQKHSRAGKKKKYNSGDGVKMRAENGLWGKKMPPLLLDSSQQSGTDMEMAKLGAGLNAPHPCLSCIISEDSISDPSPLPSSQGSLKFSLLYRREQCELLVSGLEVRGLPSHRHTEVAVWLRLLRRVPSHTPGLQCVVQEWQSRAVKNCSGTAFGEHFVCSLQDAEMERSTLKMEVQHFDKYSRNAALGEVRVALSQLKASQSLVLCAELQKTTKDIVGEVLLSLRCLPISQRMEVGLLKAKTTPPRRAAEKRVYARIDVSCRRHRQKHQKSRPQAHTSLIIFNETFLFPMPQAAAWDCSVLISLYEVGPEPRHLIGQASVGRSMARDAADHWDLMAKSIQQPVAQWHPLLIX
g_166	DE	0.997678	0.505786	0.25	C2 domain-containing protein
g_166	CC_ARGOT	14.5482	0.848131	31045	dense core granule
g_166	MF_ARGOT	13.0681	0.829595	1786	phosphatidylserine binding
g_166	BP_ARGOT	12.637	0.820866	48791	calcium ion-regulated exocytosis of neurotransmitter
g_166	MF_ARGOT	11.1607	0.78978	5544	calcium-dependent phospholipid binding
g_166	CC_ARGOT	11.1114	0.788706	30672	synaptic vesicle membrane
g_166	BP_ARGOT	11.7426	0.802263	48488	synaptic vesicle endocytosis
g_166	MF_ARGOT	10.9602	0.785402	30276	clathrin binding
g_166	MF_ARGOT	10.1779	0.767929	149	SNARE binding
g_166	MF_ARGOT	6.92284	0.68674	5509	calcium ion binding
g_166	CC_ARGOT	9.00476	0.740415	30424	axon
g_166	CC_ARGOT	2.54963	0.536549	5886	plasma membrane
g_167	original_DE	euk	n.d.	-13.2	g_167
g_167	qseq	n.d.	n.d.	n.d.	MDLDIQCEEMNPSRWAELLSTMKSCSTIRLDDCNLSSSNCKDLSSIIHMNPSLKELKLNNNELGDAGIEYLCKGLLTPSCSLQKLWLQNCNLTSASCETLRSVLSAQPSLTELHVGDNKLGTAGVKVLCQGLLNPNCKLQKLQLEYCELTADIVEALNAALQAKPTLKELSLSNNTLGDTAVKQLCRGLVEASCDLELLHLENCGITSDSCRDISAVLSSKPSLLDLAVGDNKIGDTGLALLCQGLLHPNCKIQKLWLWDCDLTSASCKDLSRVFSTKETLLEVSLIDNNLRDSGMEMLCQALKDPKAHLQELWVRECGLTAACCKAVSSVLSVNKHLQVLHIGENKLGNAGVEILCEGLLHPNCNIHSLWLGNCDITAACCATLANVMVTKQNLTELD…
g_167	DE	2.09238	0.867108	0.863636	Ribonuclease inhibitor
g_167	GN	n.d.	n.d.	n.d.	RNH1
g_167	CC_ARGOT	1.5384	0.484795	5737	cytoplasm
g_167	MF_ARGOT	0.841718	0.437914	8428	ribonuclease inhibitor activity
g_167	BP_ARGOT	0.744094	0.429951	45765	regulation of angiogenesis
g_167	CC_ARGOT	1.21387	0.464675	32311	angiogenin-PRI complex
g_167	CC_ARGOT	0.429651	0.399875	5654	nucleoplasm
g_168	original_DE	euk	n.d.	-13.2	g_168
g_168	qseq	n.d.	n.d.	n.d.	MGRKKKREGERKEKEEGEKREGTEGREYRKKGKREERKEVKQRGREENTEKIGKGSGKGGAADALLPVRRRGASPQGGAERSGTGRAGAAGGRWRRLGGRGQGQAAAVRAEVRRRGREWERGQSRGPRERSGKRRVLVAGGEVVPGELVAGHGAAYRTSGVSATAGVKRX
g_169	original_DE	bac	n.d.	-13.2	g_169
g_169	qseq	n.d.	n.d.	n.d.	MGCAARPGAAGRPPVVRSGGARSIAGLCAGGTRENVVVCEGVRTGDAGGSARLCRSSRGARGAATASPVPRAENPPGGSCGPPEAEKSLHSLPRLARGTFPYVGAPGPRGGCEGLRDGGGVCGTAARGGRCAGTAGAAAGPELCGCAADGAGVX
g_170	original_DE	euk	n.d.	-13.2	g_170
g_170	qseq	n.d.	n.d.	n.d.	MKKDIDTLITQEKAEIIAKYEKGRQEGATIDPWEDADFTLYKVTDRFGFLHEQELPTRTALEEKQKQQEIERVDKWLKMLKKWGKYRNSDKMCRRVYKGIPLQVRGQVWSLLLDVEKMKKENEGKYEQMKQQAKSWSSEIKQIDLDVNRTFRNHIMFRDRYGVKQQALFHVLSAYSVYNTEVSYCQGMSQIAAILLMYLNEEDAFWALAQLLTNQKHAMHGFFIPGFPKLQRFQAHHEQILSKLFPKLKKHMDKEQMTTGIYTTKWFLQCFIDRTPFTLTLRLWDIYILEGERVLTAMAYTILKLHKKRLLKMTLEDLREFLQEKIAASLQYEDDAVIDQLQVSMSELRKMKFDLPPPAKPDEFPRRPLGLELSLNPLATKANAAANGQNGLLGEHPSD…
g_170	DE	1.62527	0.745018	0.205128	USP6 N-terminal-like protein (Fragment)
g_170	MF_ARGOT	9.44598	0.750962	31267	small GTPase binding
g_170	MF_ARGOT	8.77271	0.734764	5096	GTPase activator activity
g_171	original_DE	euk	n.d.	-13.2	g_171
g_171	qseq	n.d.	n.d.	n.d.	MTEYKLVVVGAGGVGKSALTIQLIQNHFVDEYDPTIEDSYRKQVVIDGETCLLDILDTAGQEEYSAMRDQYMRTGEGFLCVFAINNTKSFEDIHQYREQIKRVKDSDDVPMVLVGNKCDLPARTVETRQAQDLARSYGIPYIETSAKTRQGVEDAFYTLVREIRQHKLRKLNPPDESGPGCMNCKCVISX
g_171	DE	1.0521	0.529946	0.863636	small monomeric GTPase
g_171	GN	n.d.	n.d.	n.d.	HRAS
g_171	CC_ARGOT	7.85313	0.7116	139	Golgi membrane
g_171	MF_ARGOT	6.63035	0.678582	3924	GTPase activity
g_171	BP_ARGOT	3.94449	0.593078	7165	signal transduction
g_171	MF_ARGOT	5.98803	0.660011	5525	GTP binding
g_171	BP_ARGOT	1.17496	0.46209	90402	oncogene-induced cell senescence
g_171	BP_ARGOT	1.05329	0.453719	98696	regulation of neurotransmitter receptor localization to postsynaptic specialization membrane
g_171	BP_ARGOT	1.04221	0.452933	48169	regulation of long-term neuronal synaptic plasticity
g_171	BP_ARGOT	1.03586	0.45248	42088	T-helper 1 type immune response
g_171	BP_ARGOT	0.98578	0.448864	48144	fibroblast proliferation
g_171	CC_ARGOT	0.715268	0.427501	98978	glutamatergic synapse
g_171	BP_ARGOT	0.985211	0.448822	42832	defense response to protozoan
g_171	CC_ARGOT	0.678377	0.424292	1905360	GTPase complex
g_171	CC_ARGOT	0.421733	0.398994	5654	nucleoplasm
g_171	BP_ARGOT	0.963807	0.447248	71480	cellular response to gamma radiation
g_171	BP_ARGOT	0.958662	0.446867	1900029	positive regulation of ruffle assembly
g_171	MF_ARGOT	1.60302	0.488538	160185	phospholipase C activator activity
g_171	BP_ARGOT	0.956105	0.446677	60612	adipose tissue development
g_171	BP_ARGOT	0.93919	0.445416	48146	positive regulation of fibroblast proliferation
g_171	CC_ARGOT	0.221385	0.373019	5829	cytosol
g_171	BP_ARGOT	0.921549	0.444088	14044	Schwann cell development
g_171	BP_ARGOT	0.918858	0.443884	2000630	positive regulation of miRNA metabolic process
g_171	MF_ARGOT	0.787019	0.433513	43495	protein-membrane adaptor activity
g_171	CC_ARGOT	0.156102	0.362068	5886	plasma membrane
g_171	MF_ARGOT	0.749739	0.430425	19003	GDP binding
g_171	BP_ARGOT	0.899329	0.442397	32729	positive regulation of type II interferon production
g_171	BP_ARGOT	0.899095	0.44238	90303	positive regulation of wound healing
g_171	BP_ARGOT	0.864509	0.439705	90314	positive regulation of protein targeting to membrane
g_171	BP_ARGOT	0.855961	0.439036	51402	neuron apoptotic process
g_171	BP_ARGOT	0.815362	0.435812	46330	positive regulation of JNK cascade
g_171	BP_ARGOT	0.813499	0.435662	42552	myelination
g_171	BP_ARGOT	0.791806	0.433904	50679	positive regulation of epithelial cell proliferation
g_171	BP_ARGOT	0.78815	0.433605	43524	negative regulation of neuron apoptotic process
g_171	BP_ARGOT	0.752283	0.430638	70374	positive regulation of ERK1 and ERK2 cascade
g_171	BP_ARGOT	0.745917	0.430104	32869	cellular response to insulin stimulus
g_171	BP_ARGOT	0.676092	0.42409	8285	negative regulation of cell population proliferation
g_171	BP_ARGOT	0.675078	0.424001	30335	positive regulation of cell migration
g_171	BP_ARGOT	0.634092	0.420323	2253	activation of immune response
g_171	BP_ARGOT	0.573141	0.414625	32956	regulation of actin cytoskeleton organization
g_171	BP_ARGOT	0.493592	0.406712	51726	regulation of cell cycle
g_171	BP_ARGOT	0.48414	0.40573	45944	positive regulation of transcription by RNA polymerase II
g_171	BP_ARGOT	0.463454	0.403548	6897	endocytosis
g_171	BP_ARGOT	0.44071	0.401092	10629	negative regulation of gene expression
g_172	original_DE	bac	n.d.	-13.2	g_172
g_172	qseq	n.d.	n.d.	n.d.	MRAGRASLPSRRAFFPPGLPADSSPHGCSSTAASLGGRKAKGGADGPAAAHPALRHLRAAPRPGTARSAPRRRGRPRDGGGGGSAGRREAAAAPRRCPRSPQGAARSRAHPQRGEQAEPPGTPRTGGSAAAAPVFPPAPSRPRSLTRAGCASCGGRRKFAVEX
g_173	original_DE	bac	n.d.	-13.2	g_173
g_173	qseq	n.d.	n.d.	n.d.	MCVRGERSGAGARPAGGRGTRPGCRLRPAATHGRPPALIGGPRRHRPPGGLRRLSIICRGPPTRGLAVGRWRCGRPACGAWGLSLTRRLRGALGAAPRCLDVFLVVRGPRLNIVLEVRPHQSX
g_174	original_DE	bac	n.d.	-13.2	g_174
g_174	qseq	n.d.	n.d.	n.d.	MAPTNAQEPPGCHQLLPARDRGTKRGSQQQKPAATGPERLPPAAGEAPVTRQPPPPRGSPGLPPPLRPAATRRARRLATGCGTMGAGGRRALRVPX
g_175	original_DE	euk	n.d.	-13.2	g_175
g_175	qseq	n.d.	n.d.	n.d.	MVRSMCNGKAAWIQPKPSYSFQTWNCTVVYNCSDLTHGLSQVICGNPIKALRARRLKLGPPAASSLKLCSLKIENPDISVGGGGVSQEDVFSVPRVWREQHKCRCLHTAQQERVIPAAKVATDDEEEDEGCSPANSGESELRDTSDEDLTGGISPDSSCRSCLSRSSSDSLRAQEGTAFPSQNCCLIPSPPKSPSPATLMGFAARPQELRKHRVRCLKLTSLEEGRQPQRCQAQATQETSAELLGKGRALLSLHSAPAAQEPLPLSPQGKCQPDGSTARQRPISGPAAVGSAGISPTLDRSPHSVTSHPQPVVLSPRLTNSGRAGLLNAICPPAAGAVLQKLPARPTVSSTSQSRSPRSX
g_175	DE	0.598148	0.119751	0.787879	Leucine rich repeat containing 56
g_176	original_DE	euk	n.d.	-13.2	g_176
g_176	qseq	n.d.	n.d.	n.d.	MELKVWVDGIQRVVCGVSEQTTCQEVVIALARAIGQTGRYVLVQKLREKERQLLPLECPLESLAKCGQYANDVQFILRRTGPSVAERPSSEGAPQAPERTFIRASLPIKPRALSTDVPRPREPRKSMTFNLGPMGSVDPYAKSRWRQHAWEGMDLKDGGAGQPSKEELFKTVLRQQEQLLSLEAHGDTLETDLRLWEHGRASSQEDEILYLEHLVRRNDTELGEEEFWQSELRLEKECERERQERVRSLRASLEEYTQRIYELSARTEALQKEIQWEMAERAKRGKEIPVPSPTDLEDMAAKMKRDLEAKVKQGTQLESNLASVEKALEEAERSLQAQNQELEELNKELRQCNLQQFIQQTGATVTVGQARSEEDAQPELSPCELPACRRNGGFPPTGA…
g_176	DE	2.14313	0.877496	0.685185	Ras association domain-containing protein 7 (Fragment)
g_176	GN	n.d.	n.d.	n.d.	RASSF7
g_176	BP_ARGOT	3.94454	0.59308	7165	signal transduction
g_176	CC_ARGOT	0.674388	0.42394	34451	centriolar satellite
g_177	original_DE	euk	n.d.	-13.2	g_177
g_177	qseq	n.d.	n.d.	n.d.	MSEEQVSRCHTHSGVAESTMCVSQWLTCSWRVTGRRGPPAARRHRSARSEGREATPPEIGGGSPPGVGPFSRGASFLAPSPPARSRPVPSLTCAPQPRSSTLPTATTAAANFSFCPGPAHAARRGPSPRPPPHPPIAAPPARPLATPPHRAAQWRARPRLPALSPPVAPLSAVTAAGAALSLNDRFQHLPALPGQLEIPLRALRTAPRSSAAAQPPPNTSQRLILPPHRAWFTPPPPSFLPRRPAVVKSHGRPRWRCDPEVLRGTSGAPSAARPGLRRAAGGNPRGFRAGCGTGGGHRVRRARGIDPSNRGVARPGPPASADVGALLKCVX
g_178	original_DE	euk	n.d.	-13.2	g_178
g_178	qseq	n.d.	n.d.	n.d.	MDGEREGGVPRQSTGEAESQARGGNERGRLRNGGSSRCHTTGPWPSPEPVRSRTICGRNKLRSITGISKLGNLKKLIVSKNKIVDFPNEIQSLIYLEKLELNQNQIRVIPEGIFCHLSRLKHLRLNNNRLGALPRDLAACRGSLQYLNISNNLFRTFPQPVLQLANLQELHVQNNGLRQLPRELFQGQSLKMFKANGNPLREPPSEVCAGGIQQILNYFNQLQQGSGQEDKRIKTMFLGASLAGKSTICKSLKQRQAKLVPKEERTVGIEISEFRIEDFTFLFWDFAGQLEYYMTHHVFITPQALVILVINLHMYQTNDDAFQDLVGFWINNLFMRVPNSVVLPVGTHVDCCQKQEVEEKRSNIMAKITAMLAERKSNLTHFINNLEDSEEPEAYVDQW…
g_178	DE	1.35283	0.651755	0.482759	Roc domain-containing protein
g_178	GN	n.d.	n.d.	n.d.	LOC116997937
g_178	BP_ARGOT	7.06916	0.690756	9966	regulation of signal transduction
g_178	MF_ARGOT	2.49861	0.534218	166	nucleotide binding
g_178	CC_ARGOT	1.51428	0.483378	5737	cytoplasm
g_179	original_DE	euk	n.d.	-13.2	g_179
g_179	qseq	n.d.	n.d.	n.d.	MAALDSEGDAQKLRFGPWLLNAVNSGLYHGLCWIDPARRIFRIPWKHNARKDVTSSDVEIFKAWAKASGRYEGNAEDPAKWKTNFRCALRSTHMFTLLEDRSKCNNDPHKVYAVASAIPNDGGFGGPVADAPLQQLQQQLLLNNHDLASENTPTGSAEGAAAPALTQMDLDTLQSILQQCNISALGSQPALWAHEGDALPEDALLLSGPGVCLPVPPFQDWRHLEEQGTCSPPVPLLLGSQPLPGGGCGQDGPGGLSVSEECAIPAPSPGEELLFQPANPAPPPPAGDTGEQPLVLDITIYYRGKMVYQEQVGDSRCVLAYQTLDPAVAEQRLVLFPSPASLVDSRQRHYTEGLLGVAGLRLEQRAGQLLATRLKKCKVFWALSQQLEGGEPPLNLLRR…
g_179	DE	1.80534	0.797739	0.833333	Interferon regulatory factor 7
g_179	GN	n.d.	n.d.	n.d.	IRF7
g_179	BP_ARGOT	7.3967	0.699599	2376	immune system process
g_179	MF_ARGOT	7.36217	0.698676	978	RNA polymerase II cis-regulatory region sequence-specific DNA binding
g_179	CC_ARGOT	3.47392	0.57533	5634	nucleus
g_179	BP_ARGOT	6.8598	0.684996	45893	positive regulation of DNA-templated transcription
g_179	MF_ARGOT	6.66789	0.679639	981	DNA-binding transcription factor activity, RNA polymerase II-specific
g_179	CC_ARGOT	0.842245	0.437956	785	chromatin
g_179	BP_ARGOT	5.75131	0.652917	6357	regulation of transcription by RNA polymerase II
g_179	CC_ARGOT	0.619306	0.418967	70013	intracellular organelle lumen
g_179	CC_ARGOT	0.403268	0.396907	5829	cytosol
g_179	BP_ARGOT	1.85593	0.50251	32481	positive regulation of type I interferon production
g_179	BP_ARGOT	1.76678	0.4977	32647	regulation of interferon-alpha production
g_179	BP_ARGOT	1.73122	0.495748	32648	regulation of interferon-beta production
g_179	BP_ARGOT	1.59251	0.487935	34124	regulation of MyD88-dependent toll-like receptor signaling pathway
g_179	BP_ARGOT	1.4739	0.480979	45089	positive regulation of innate immune response
g_179	BP_ARGOT	1.40831	0.477012	2764	immune response-regulating signaling pathway
g_179	BP_ARGOT	1.26444	0.467974	60338	regulation of type I interferon-mediated signaling pathway
g_179	BP_ARGOT	1.26055	0.467722	34127	regulation of MyD88-independent toll-like receptor signaling pathway
g_179	BP_ARGOT	1.25805	0.46756	2819	regulation of adaptive immune response
g_179	BP_ARGOT	1.24195	0.466515	51607	defense response to virus
g_179	BP_ARGOT	1.22373	0.465324	140888	interferon-mediated signaling pathway
g_179	BP_ARGOT	1.21535	0.464773	1961	positive regulation of cytokine-mediated signaling pathway
g_179	BP_ARGOT	1.1382	0.459609	30522	intracellular receptor signaling pathway
g_180	original_DE	euk	n.d.	-13.2	g_180
g_180	qseq	n.d.	n.d.	n.d.	MAFLPAKLINGGIAGLIGVTCVFPIDLAKTRLQNQQNGQRMYTSMSDCLIKTIRSEGYFGMYRGAAVNLTLVTPEKAIKLAANDFFRHHLSKDGKKLTLLREMLAGCGAGTCQVIVTTPMEMLKIQLQDAGRIAAQKKLMAAQAQLSSSSAAGAAEPVVEARTTATQITRELLRSKGIAGLYKGLGATLLRDVPFSIVYFPLFANLNKLGQKDPNVKAPFYVSFLSGCVAGSTAAVAVNPCDVIKTRLQSLQRGVNEDTYSGILDCTKKIWQKEGPMAFLKGAYCRALVIAPLFGIAQVVYFIGIAEFLLDVLPKHRAX
g_180	DE	2.19686	0.887878	0.613636	Mitochondrial glutamate carrier 1 (Fragment)
g_180	GN	n.d.	n.d.	n.d.	SLC25A22
g_180	BP_ARGOT	13.814	0.843654	43490	malate-aspartate shuttle
g_180	MF_ARGOT	12.9977	0.82818	5313	L-glutamate transmembrane transporter activity
g_180	CC_ARGOT	5.29155	0.638709	5743	mitochondrial inner membrane
g_180	MF_ARGOT	12.9756	0.827734	15183	L-aspartate transmembrane transporter activity
g_180	BP_ARGOT	12.1317	0.810441	70778	L-aspartate transmembrane transport
g_180	BP_ARGOT	11.8982	0.805549	15813	L-glutamate transmembrane transport
g_180	MF_ARGOT	0.958746	0.446873	5280	amino acid:proton symporter activity
g_180	BP_ARGOT	0.28939	0.38281	1902600	proton transmembrane transport
g_181	original_DE	bac	n.d.	-13.2	g_181
g_181	qseq	n.d.	n.d.	n.d.	MSAALLQRARDCGSPPALPQPATPARRWGRKRVWGETRLRGDRLVSPRPARPPRGARGGGGAAPRALPARASPSRGHVCGARSAAGRPLLCGEPFPCCSRAVRCAVASRRWAGTGESASAQRWAPSX
g_182	original_DE	euk	n.d.	-13.2	g_182
g_182	qseq	n.d.	n.d.	n.d.	MQKMAELLKLGDKDGEGAPGAPSLTGSCLADNRLTLDVYPDGCCRLLRLFEGQLADVVQVELLRLSTNDHLLDAALSILPHLKRLKSLVLKGGHVRDEFGSCQHGSLTSLPPDVGTLRCLTHLDLSFNSLSTLPSCIPCLTSLRMLLVSHNNLVALPENFGSLSKLTFFSAMKNQLKNLPRSIGELTALEDLDLSENALEFLPEEVGNLHSCTELDLSGNQLSSIPDSLANLKSLRRLHLHSNLLVTVPASLANLPNLSRLDLQNNFLRAVPPEIQTAPFVHLRGNPLGETELSLQADESSATELRRLFLASEEDSFTVTSEGCEVVLACGIRFYFPPEAASDPLRIYFRILAPDPGWVKLTHHDVLLSRVLELQPHGVKFQQEVEIWMPYASPETLHQ…
g_182	DE	2.02841	0.853209	0.617647	P53-induced death domain protein 1
g_182	GN	n.d.	n.d.	n.d.	PIDD1
g_182	BP_ARGOT	8.16732	0.71966	6915	apoptotic process
g_182	CC_ARGOT	1.43212	0.478463	5737	cytoplasm
g_182	MF_ARGOT	0.290564	0.382969	4175	endopeptidase activity
g_182	EC_ARGOT	0.290564	0.382969	EC:3.4.99.-	GO:0004175
g_182	CC_ARGOT	0.427932	0.399685	1905369	endopeptidase complex
g_182	BP_ARGOT	5.14658	0.634102	6974	DNA damage response
g_182	CC_ARGOT	0.253374	0.377788	12505	endomembrane system
g_182	BP_ARGOT	3.94456	0.59308	7165	signal transduction
g_182	CC_ARGOT	0.180335	0.36636	5634	nucleus
g_182	BP_ARGOT	0.722742	0.428141	2000134	negative regulation of G1/S transition of mitotic cell cycle
g_182	BP_ARGOT	0.659087	0.422579	16540	protein autoprocessing
g_182	BP_ARGOT	0.578255	0.415115	43122	regulation of canonical NF-kappaB signal transduction
g_182	BP_ARGOT	0.520442	0.40945	43066	negative regulation of apoptotic process
g_182	BP_ARGOT	0.42677	0.399556	1903047	mitotic cell cycle process
g_183	original_DE	bac	n.d.	-13.2	g_183
g_183	qseq	n.d.	n.d.	n.d.	MRCWLRRPCSAPRRFPSCKVWRDHTSWARLTPPPRQVSAGRLCAPYCHPLCGNERCCPDHGPQRGLGGTARDREGGGAGRAPRSEERFPGREASGRAGCRASGQRVLLGPAGFAACRAGPAMAGGGNAASPATGFIX
g_184	original_DE	euk	n.d.	-13.2	g_184
g_184	qseq	n.d.	n.d.	n.d.	MRYVAAYLLAVLGGNDSPTSKDLKKILDSVGIETDDERLNKVISELNGKNIEDVIAQGNGKLASMPAGGAVAVSTGGVSAAPAAGAAPAAAEEKKEEKKEESEESDDDMGFGLFDX
g_184	DE	1.96029	0.837425	0.533333	Large ribosomal subunit protein P2 (Fragment)
g_184	GN	n.d.	n.d.	n.d.	RPLP2
g_184	BP_ARGOT	14.2455	0.846299	2182	cytoplasmic translational elongation
g_184	CC_ARGOT	7.23056	0.695139	22625	cytosolic large ribosomal subunit
g_184	MF_ARGOT	3.82841	0.588803	3735	structural constituent of ribosome
g_185	original_DE	euk	n.d.	-13.2	g_185
g_185	qseq	n.d.	n.d.	n.d.	MFPLDSAWNISFAGCGFLGVYHIGVASCLQEHAPFLVANARKVYGASAGALTATALVSGACLGEAGASIIRVSKEARKRFLGPLHPSFNLVKIIRLCLSKTVPENGHEVAAGRLGISLTRVSDGENVILSDFHSKEELIQACVCSTFIPVYCGLIPPTLRGVRYVDGGISDNLPRYELKNTITVSPFSGESDICPRDSSTNMHELRVTNTSIQFNLRNLYRLSKALFPPEPQVLRDMCKQGYRDALHFLKKNGLLHLHRPSPAGPLLAIEAPPGEKKEEEKEAEDQMEDNTALAVVEDHIFEHLPPKLNQALLEACAERRGLLTGISNTLPIRVATAMMVPYLLPLESAVSFTVRLLEWLPDIPEDIRWMREQITEICNYLVKKAKKKLGSHLSARKQI…
g_185	DE	1.19253	0.589289	0.545455	triacylglycerol lipase (Fragment)
g_185	GN	n.d.	n.d.	n.d.	PNPLA2
g_185	BP_ARGOT	15.6879	0.85486	10898	positive regulation of triglyceride catabolic process
g_185	MF_ARGOT	10.8421	0.782805	4806	triacylglycerol lipase activity
g_185	EC_ARGOT	10.8421	0.782805	EC:3.1.1.3	GO:0004806
g_185	CC_ARGOT	9.29533	0.747389	5811	lipid droplet
g_185	CC_ARGOT	1.50654	0.48292	5737	cytoplasm
g_185	MF_ARGOT	0.607519	0.417874	51265	diolein transacylation activity
g_185	BP_ARGOT	12.309	0.814122	19433	triglyceride catabolic process
g_185	CC_ARGOT	0.902456	0.442637	16020	membrane
g_185	MF_ARGOT	0.607519	0.417874	51264	mono-olein transacylation activity
g_185	MF_ARGOT	0.348265	0.390388	4623	phospholipase A2 activity
g_185	EC_ARGOT	0.348265	0.390388	EC:3.1.1.4	GO:0004623
g_185	CC_ARGOT	0.210022	0.371242	5654	nucleoplasm
g_185	BP_ARGOT	10.4404	0.773865	55088	lipid homeostasis
g_185	CC_ARGOT	0.0739947	0.344197	71944	cell periphery
g_185	BP_ARGOT	0.594669	0.416671	160077	lipid droplet fusion
g_185	BP_ARGOT	0.561401	0.413494	1905691	lipid droplet disassembly
g_185	BP_ARGOT	0.533283	0.410734	10891	negative regulation of sequestering of triglyceride
g_185	BP_ARGOT	0.522109	0.409617	6651	diacylglycerol biosynthetic process
g_185	BP_ARGOT	0.378688	0.394053	19915	lipid storage
g_185	BP_ARGOT	0.219064	0.37266	55082	intracellular chemical homeostasis
g_186	original_DE	euk	n.d.	-13.2	g_186
g_186	qseq	n.d.	n.d.	n.d.	MENQRSSLLGYVHWEAEEEGDEEDEVASGASPSSQMSELEDVQVEMLEKARELFQLCDKDEKGFITKLDMQRLQSELPLTLEQLETVFDSLEQNNNGYLTPVEFSMGLGKLIGIDLCQGAGRTDRSSHEETFESGWSDDMDPADDEEKRFCSMMEQLGAAQVFEDPSEVRDLWARLRKERPELLANFEEFLLRVSSYIREVNHEKESMEQALKRKETDHDREVRCLYEEMEQQIKAERERLICQEALRHKRSNLLQKELRSKEQELEKILYRQKKLEHQLQSLNSEQLETRVQNERLRHLNENLLEELEKSKWELEAVKGQLQKLQKEAQNEQEQKDRDVFRVSKNMQKEKQSLLRQLELLREMNKKLRDERDTFEAKKPAPQSKKPLLKKGSVLGSYL…
g_186	DE	1.48024	0.697394	0.804348	Calcium release activated channel regulator 2B
g_186	GN	n.d.	n.d.	n.d.	CRACR2B
g_186	MF_ARGOT	6.78317	0.682866	5509	calcium ion binding
g_186	BP_ARGOT	0.337128	0.389007	19433	triglyceride catabolic process
g_186	CC_ARGOT	0.26364	0.379254	32588	trans-Golgi network membrane
g_186	MF_ARGOT	6.49326	0.674697	3924	GTPase activity
g_186	CC_ARGOT	0.254588	0.377963	5811	lipid droplet
g_186	MF_ARGOT	5.86422	0.656318	5525	GTP binding
g_186	BP_ARGOT	0.28595	0.382345	55088	lipid homeostasis
g_186	MF_ARGOT	0.290803	0.383001	4806	triacylglycerol lipase activity
g_186	EC_ARGOT	0.290803	0.383001	EC:3.1.1.3	GO:0004806
g_187	original_DE	bac	n.d.	-13.2	g_187
g_187	qseq	n.d.	n.d.	n.d.	MPAAGRAVRRGARRRGARRSGALPLRGEAGRPEMADARGARGERRAGLPAAVSAVWRGAGRVKLVGLLEAEDGESGADX
g_188	original_DE	bac	n.d.	-13.2	g_188
g_188	qseq	n.d.	n.d.	n.d.	MIMVAEPAPPLPPATLRAGPHAPAPPRPTTPPGRSHCGGTGRLMVAAALRRPARLKSVRERGGLVIAFRVRGAWRQPGPAERRAAAPAALAGRAEARRRRALPSFLPRAHLLLCNRTSAAATALLASCPRYRSSAGWKRNWWLQRCGTGQPAPLPFPERGAVRAAAGEEAGRDRRSVSCARRRSARRSPLIWRKQGCGTPLELAVLWRQQVCREFLNSGLRGWGAWGGLGAARFRSLGLSASRAQRKQTASGAARLMPSSRRSPARGAVQPAGPEPFPAPRRVEVALARRAARCGFTGGPQLGKLGGSGRCVLKLRAFLSSERYACLAEGCALQCLX
g_189	original_DE	bac	n.d.	-13.2	g_189
g_189	qseq	n.d.	n.d.	n.d.	MLRCKSSAPTAITSLPFKAQAGPDPQPGRDRTGPRVGPEPPGPGEAGPRPELRAQQREEQRCGAELRAPRSALPRSAPRGSGGRGGSAGPRELPAGQWDKRRPRALSALPGGGRGDPLX
g_190	original_DE	euk	n.d.	-13.2	g_190
g_190	qseq	n.d.	n.d.	n.d.	MRRSSTDESTYHRSPSLDSKDYSFPNGAFRRYSSMYGGQFGAASNSFFGFHTNPGPKATKAKYTSPKGNKYVVFYLDLSFIFLLELKRCSMAHNCLQCIKYLMFVFNLLFWWVLALPRGSEKWRKTSLLLGLQLCARSSSTQCEVCVCQQGTVMEHTSVRCYVTVVTNEVVVSSRVVGHFTATNESTGCRRRLQELGEGCSSX
g_191	original_DE	bac	n.d.	-13.2	g_191
g_191	qseq	n.d.	n.d.	n.d.	MRLGGSRAPAGGLRRGCDAPCRVEAAPQRPCPLPQPLSCPRRGPGHPHARRPAAVLLGPNAPPRPSGQIDPGRRPFSVRRRGGTARLHFRGGGGRX
g_192	original_DE	euk	n.d.	-13.2	g_192
g_192	qseq	n.d.	n.d.	n.d.	MPAVSKGDGMRGLAVFISDIRNCEWRLGRGGAWAERGRADGRRGLLCFGPGRSPLIRLLSHLPGALPFPLRRSEPLAVLSSRNGDAPRGAAGDAGGGCRDRRLSDAGVGLICVCLASFRCFLIPHGPICWGRVGEGASARGWSEAGVGGLVVGCGEHRGSPRPASGCRCSAEPQESSRPLQGRGELGLRWPCLRLAX
g_193	original_DE	bac	n.d.	-13.2	g_193
g_193	qseq	n.d.	n.d.	n.d.	MLSTVEDTVEKGKDADDGSGLVLAVETVKKTGEGDSVGALVVREEGLGHRVVGVGFGVEVGSEEVCVDGAADGSLVLRVLLGARDVVGGKPGLLVGLASLEIEVLKVLVEDVVEVVISVMIYGTMCGTVVVLWVEVAGKTAEVSX
g_194	original_DE	bac	n.d.	-13.2	g_194
g_194	qseq	n.d.	n.d.	n.d.	MEEGSGLRVVGLSFGVEETVDGAADGSLVLRVLLAAGDVVFSGTSGLLVGLASLETEVVEVLVADTMGVVFSVVTGSTVCGTAVIFWVEAAGRKHSAVEDTDKKVEDANDSSGLVLTVESVEEAGVDFIMEVGGEEVTVDGAEDGSLVLTVLLGAGNVVVSGTSGLLVGLASLEMEVLEMLVEAGMAVVLSVVIYGTMCSTVVVSWMKVAGKKALVGX
g_195	original_DE	bac	n.d.	-13.2	g_195
g_195	qseq	n.d.	n.d.	n.d.	MEVVRNLEHHEYNSVEYKCVKHDCPANNNWVCPHFHLWHDALQQHHQQHREHHACYCHTHVRPDFIVCTYPPEDCIWTDWIDSRVHNSYHNYNHRRNQYNGVPFTDNKHKIHSECVKHDSPANNNWVCPHFHLWHDALQQHHRQHREHHTCYWHAPIRPDFKHHEYKCVEYKCVEYKCVKHDCPANNNWVCPHFHLWHDALQQHHRQHREHHACYWHAPIRPDFKHHEYKCVEYKCVKHDCPANNNWVCPHFHLWHDALQQHHRQHREHHACYWHAPIRPDFKHHEYKCVEYKCVEYKCVKHDCPANNNWVCPHFHLWHDALQQHHRQHREHHACYWHAPIRPDFSQHIHTQANTHHLPTTX
g_196	original_DE	euk	n.d.	-13.2	g_196
g_196	qseq	n.d.	n.d.	n.d.	MSLLIFHSNSLVILTQAKEHGKETNLVLFNDKKVVPHISKNGIRITSSGLYVIVEIPELEVYVSYSRLAFYIKLPFGKYYNSTMGLCGTCTNQKSDDARKRNGEVIESFKEMALDWKIPVSTNRYCNPGISEPARIENYQHCEPSELCKIIWNLTECHRVVPPQPYYEACVASRCSQQHPSTECQSMQTYAALCGLHGVCVDWRGQTSGQCEATCAQDQVYKPCGEAKRNTCFSRDVSMDTLPSRNNTPVFVEGCYCPDGNILLNEHDGICVSVCGCTAQDGSVKQPREAWEHDCQYCTCDEETLNISCFPRPCAKSPPINCTKEGFVRKIKPRLDDPCCTETVCGIDLPHKCKRSVKEQHIVHKHCKSAAPVPVPFCEGTCSTYSVX
g_197	original_DE	euk	n.d.	-13.2	g_197
g_197	qseq	n.d.	n.d.	n.d.	MCLNYRIRVLCCRPNPDCVQTITPTTSPTTTTTSTGTSSTSPFITVTTSTSTATPTSSETTPITSTSTSTLTPTPTLISSTSSPSTTHHVTTCDLELCSWTDWFDVDFPSSGTSQGDFETYQHIRAAGKEVCRQPKQIECQAEDYPEISIEQVGQVVQCDVHYGLVCKNQDQRGSFKMCLNYRIRVLCCRPNPDCVQTITPTTSPTTTTTSTGTSSTSPFITVTTSTSTATPTSSETTPITSTSTSTLTPTPTLISSTSSPSTTHHVTTCDLELCSWTDWFDVDFPSSGTSQGDFETYQHIRAAGKEVCRQPKQIECQAEDYPEISIEQVGQVVQCDVHYGLVCKNQDQRGSFKMCLNYRIRVLCCRPNPDCVQTITPTTSPTTTTTSTGTSSTSPFIT…
g_198	original_DE	euk	n.d.	-13.2	g_198
g_198	qseq	n.d.	n.d.	n.d.	MKTPPPVPGSTTTIITTTPIGPSSPTTTLTTSSPPSTCQPRCAWTQWFDVDSPKSGSQDGDFETFANIRAAGFDLCSQPQDIRCRAENYPDRSLESLDQKLNCSLDVGLECRNEDQNSKYPMCFNYQYCQHHQDFTPSNKKYDHHYNHKSRDHHTYQQCRHHQDLTPYHNRYEHHYNHKSRDHHTYQQCRHHQDLTPNHNSTCQPRCTWTQWFDVDSPKSGSQDGDFETFANIRAAGFDLCSQPQDIRCRAENYPDRSLESLDQKLNCSLDVGLECRNEDQNSKYPMCFNYQWFDVDSPKSGSQDGDFETFANIRAAGFDLCSQPQDIRCRAENYPERSLESLDQKLNCSLDVGLECRNEDQNSKYPMCFNYQNHHTYQKLVHYKVFCCSDRTHNQIYK…
g_199	original_DE	bac	n.d.	-13.2	g_199
g_199	qseq	n.d.	n.d.	n.d.	MATTVSTQRGPVSAAGRTAAFVLGAPEDTLLVILGRPRPGVDPSFPLSPRPDFCRAAGGPRFSFRARRPRERGERTRPSSVRCGGEGRGCLCSPVPAX
g_200	original_DE	bac	n.d.	-13.2	g_200
g_200	qseq	n.d.	n.d.	n.d.	MPHRAVRLCAPIRGRSWQRRCVGAHTARDFTASRRAARLGLLPVFSPKGSSYPRPCPTARPAADIAAETQPKGIASPPARWRPRNLVPSPAAPPSGALRSAAVRSPQSTRAHAQRRYRANASPPFAGRLAHAQTGSTAPPRRQRASGPSAHALGSGRLWKPPEGAGSALPQACAAVEAGLGSADAGASRCVRVGGGRRSGX
g_201	original_DE	bac	n.d.	-13.2	g_201
g_201	qseq	n.d.	n.d.	n.d.	MEVKHSQCLSRGPPPSLVPAVTIATRPTAAPRAASFPPGARRTAPRDHEAAGSSAPYRRRKGAPRYLPGREAARVTDTKRTRHSSYLYX
g_202	original_DE	euk	n.d.	-13.2	g_202
g_202	qseq	n.d.	n.d.	n.d.	MAVGRKSKGKPNGKKPAPEEKKLYLEPEYTKSRITDFEFKELVMLPREIDLNEWLASNTTTFFHHINLQYSTISEFCTGESCQTMAVCNTQYYWYDERGKKIKCTAPQYVDFVMSSVQKLVTDEDVFPTKYGKEFPNSFESLVKKICKYLFHVLAHIYSSHFKETLALELHGHLNTLYTHFILFIREFNLVDLKETTIMDDLTEVLCSSSGSSSNGSGNGSSNSAGAQNHVKERX
g_202	DE	2.83168	0.962721	0.772727	MOB kinase activator 2
g_202	GN	n.d.	n.d.	n.d.	MOB2
g_202	MF_ARGOT	4.17039	0.601221	16301	kinase activity
g_202	CC_ARGOT	0.373749	0.393468	5730	nucleolus
g_202	BP_ARGOT	0.0522031	0.337875	7165	signal transduction
g_202	CC_ARGOT	0.363184	0.392204	5654	nucleoplasm
g_202	MF_ARGOT	0.144726	0.359938	30295	protein kinase activator activity
g_202	CC_ARGOT	0.19065	0.368099	5829	cytosol
g_203	original_DE	bac	n.d.	-13.2	g_203
g_203	qseq	n.d.	n.d.	n.d.	MPKHVRSLGQTPYPGDPGLSLSARAHQKARLSGSTGNPGLSRNRRTRVSPRAATATPTSTPGCRAGPGRSPGYRGRAARGTLTLTRGARLPLPFLLPAAAEPSLPQHFAHRLQHHLAAQSSLGALRVDGPFGGQATLIPDHGPAERGAAGHGSAYRGLSPLSPAAPPAPPRQWAAGGGCSARPAPLRLPPGAARGAAPGGAPARRSAVTPX
g_204	original_DE	euk	n.d.	-13.2	g_204
g_204	qseq	n.d.	n.d.	n.d.	MIWGLANAYRALFDTIPEREKVFENEQKSLQAEKENFQAERDSLLVERQDLQFERDTLRSERDALQNERDSLQSKLHNLQFQQDTLQSERDALRSERDILKSERDVLRTERDAFQQAKLSLQVEINRIQSNQAKLESELNTVIIERDRLQAKLETESIRINQPDQPQEATDSMSVAPVRGRKTKRISTQLEQKKEEEGKVEEADTVRGPEEWLQDPGEAPLSPAITKVVEKLDRMESKQEDIIDELSTMLNADGPMVVPDTSDEDQNSQNCLLEELINLVSTQPASSNISAIKRRRPPARANDNRRTTSRLALWRFLRDHGEDMEKWHDQPTPALQARVKELQDRSTNKVNFSKRVIAPVAAGAPCILGIDYLRMGYFKDPKGYRWAFGIAAVDTEGVK…
g_205	original_DE	bac	n.d.	-13.2	g_205
g_205	qseq	n.d.	n.d.	n.d.	MCRCGGPSPALSRQEARRPATPALPTAKKGMKSYFSRPRLSPPHLFLPSGPAGYTRQRCPAGSGCTELFLRGHGGMRRRTTPRRQTTAPSFTPRGTHPPGASRGAHPTARPRTPAARGRLCSHLRRARQKGKAAGRSPNGRGGERGPYSPHEPVHGWVPPPRVAPAAAASFSLPAHEAPTCPAPAAGCRPGGRCPAATPLARRPGSSLX
g_206	original_DE	euk	n.d.	-13.2	g_206
g_206	qseq	n.d.	n.d.	n.d.	MPVDVMLAPSEDQFWTDVHEGQMKLKIRVRRMKESRDMRGGFATFSSCFPGLCEGKPAAILPMSISQPCLPVANVGPTRILPHLYLGSQKDVLNKDLMTQNGISYVLNASNSCPKPDFICDSHFMRIPVNDNYCEKLLPWLDKSIEFIDKAKVSSCQVIVHCLAGISRSATIAIAYIMKTMGMSSDDAYRFVKDRRPSISPNFNFLGQLLEYERSLKLLKALKAQGDRGEGEAPQDTTEASEAGRHPTPSTSEKVEDVPRSTTSAPPPSDPERQGGPPKVLSPTALQQGLNGLHLSSERIQDTNRLKRSFSLDIKSAYSPGLRQDPPGLPSTGEAPKLCKLDSPSAPSGQFSPVPDSPDRPSGPDLLLEAKVRQRRKHRHQAGSPAHGLSLNIGSARKS…
g_206	DE	0.796426	0.410814	0.653061	Dual specificity protein phosphatase 8 (Fragment)
g_206	GN	n.d.	n.d.	n.d.	DUSP8
g_206	MF_ARGOT	17.609	0.865672	180004	RNA polymerase II CTD heptapeptide repeat Y1 phosphatase activity
g_206	BP_ARGOT	12.1325	0.810457	43409	negative regulation of MAPK cascade
g_206	CC_ARGOT	1.5208	0.483762	5737	cytoplasm
g_206	MF_ARGOT	17.609	0.865672	180006	RNA polymerase II CTD heptapeptide repeat S2 phosphatase activity
g_206	MF_ARGOT	17.609	0.865672	180008	RNA polymerase II CTD heptapeptide repeat S7 phosphatase activity
g_206	CC_ARGOT	0.0327624	0.330982	16020	membrane
g_206	MF_ARGOT	17.609	0.865672	140791	histone H2AXS140 phosphatase activity
g_206	MF_ARGOT	16.9612	0.862095	180005	RNA polymerase II CTD heptapeptide repeat T4 phosphatase activity
g_206	MF_ARGOT	16.9612	0.862095	180007	RNA polymerase II CTD heptapeptide repeat S5 phosphatase activity
g_206	MF_ARGOT	13.5374	0.838937	1990439	MAP kinase serine/threonine phosphatase activity
g_206	MF_ARGOT	13.4392	0.836996	8330	protein tyrosine/threonine phosphatase activity
g_206	MF_ARGOT	13.4377	0.836966	33550	MAP kinase tyrosine phosphatase activity
g_206	MF_ARGOT	13.0891	0.830016	17017	MAP kinase tyrosine/serine/threonine phosphatase activity
g_206	MF_ARGOT	8.87981	0.737382	33192	calmodulin-dependent protein phosphatase activity
g_206	BP_ARGOT	4.62737	0.617044	6338	chromatin remodeling
g_206	BP_ARGOT	3.7257	0.584966	6357	regulation of transcription by RNA polymerase II
g_206	MF_ARGOT	6.8709	0.685304	17018	myosin phosphatase activity
g_206	EC_ARGOT	6.8709	0.685304	EC:3.1.3.16	GO:0017018
g_207	original_DE	euk	n.d.	-13.2	g_207
g_207	qseq	n.d.	n.d.	n.d.	MAGDRLPRKVMDPKKLASLLRNGAEGTLVIDSRSFVEYNSWHVLSSVNICCSKLVKRRLQQDKVSITELIQPTSKMKVEAEEHQDVVVYDQSTRDVTGLAADSFLSILLGKLDSCFHSVSILTGRSGTTQGQQQX
g_207	DE	1.02355	0.517353	0.868421	Dual specificity protein phosphatase 8
g_207	MF_ARGOT	13.5804	0.839784	8330	protein tyrosine/threonine phosphatase activity
g_207	BP_ARGOT	12.2599	0.813106	43409	negative regulation of MAPK cascade
g_207	CC_ARGOT	1.53677	0.4847	5737	cytoplasm
g_207	MF_ARGOT	13.5788	0.839754	33550	MAP kinase tyrosine phosphatase activity
g_207	MF_ARGOT	13.0752	0.829738	17017	MAP kinase tyrosine/serine/threonine phosphatase activity
g_208	original_DE	bac	n.d.	-13.2	g_208
g_208	qseq	n.d.	n.d.	n.d.	MAAHLVPGSAALLCSATAASSRPSPHHFPRRRAPRGSRPRPRANKTPSVLSENSPRAPGEKRVNSEHPASARAAGSLDFISASKTLKLLNPNPPLSRSRGKDRTAQRGAPGGPGGTRDALSPGGSAPSARAAAPRRSAPAGYDLIAGAFPARGAARSSAELGRCAACGPCGEARPSAPAAPGAGGNGASPAAVRGRGGYGSRGDSAVVFRCREVRSVAAPPAASGAARVGLRGPYGIALLWALEVLRAVSALCASLKSSPLSFPVRADRPSSLPFPDNSLHAERRSVSRTRRX
g_209	original_DE	euk	n.d.	-13.2	g_209
g_209	qseq	n.d.	n.d.	n.d.	MDGRTGSERAERGDAAAAATTERTQDPPLGPPCPFDGAAWAPRPPPGPQQGCFACIAKPPALRHASPVLSPSSAAQLMESKGCKGDSLRPAGPCKHSVEKKTMTNPTTVIEIYPDTSEVNDYYLWSIFNFVYLNFCCLGFIALAYSLKVRDKKLLNDLNGAVEDAKTARLFNITSSALATFCIILIFIFLRYPLTDYX
g_209	DE	2.83569	0.962914	0.837209	Interferon induced transmembrane protein 10
g_209	GN	n.d.	n.d.	n.d.	IFITM10
g_209	CC_ARGOT	2.52013	0.535204	5886	plasma membrane
g_210	original_DE	euk	n.d.	-13.2	g_210
g_210	qseq	n.d.	n.d.	n.d.	MAPRGLLVLLLLALVGPCAALIRIPLTKFTSMRRTLTEVGSEIPDMNAITQFLKFKLGFADLAEPTPEILKNYMDAQYYGEIGIGTPPQKFTVVFDTGSSNLWVPSVHCHLLDIACLLHHKYDASKSSTYVENGTEFAIHYGTGSLSGFLSQDTVTLGNLKIKNQIFGEAVKQPGITFIAAKFDGILGMAFPRISVDKVTPFFDNVMQQKLIEKNIFSFYLNRDPTAQPGGELLLGGTDPKYYSGDFSWVNVTRKAYWQVHMDSVDVANGLTLCKGGCEAIVDTGTSLITGPTKEVKELQTAIGAKPLIKGQYVIPCEKISSLPVVTLMLGGKPYQLTGEQYVFKVSAQGETICLSGFSGLDVPPPGGPLWILGDVFIGPYYTVFDRDNDSVGFAKCVX
g_210	DE	2.13998	0.876867	0.727273	Cathepsin D
g_210	GN	n.d.	n.d.	n.d.	CTSD
g_210	CC_ARGOT	8.4105	0.725793	5764	lysosome
g_210	MF_ARGOT	7.85904	0.711753	4190	aspartic-type endopeptidase activity
g_210	EC_ARGOT	7.85904	0.711753	EC:3.4.23.- EC:3.4.23.1 EC:3.4.23.15 EC:3.4.23.20 EC:3.4.23.25 EC:3.4.23.32 EC:3.4.23.34 EC:3.4.23.35 EC:3.4.23.36 EC:3.4.23.4 EC:3.4.23.43 EC:3.4.23.49 EC:3.4.23.5	GO:0004190
g_210	BP_ARGOT	4.32383	0.606626	6508	proteolysis
g_210	BP_ARGOT	0.834796	0.437365	1901143	insulin catabolic process
g_210	BP_ARGOT	0.809846	0.435368	38020	insulin receptor recycling
g_210	BP_ARGOT	0.734766	0.429163	42159	lipoprotein catabolic process
g_210	CC_ARGOT	0.78519	0.433363	31904	endosome lumen
g_210	CC_ARGOT	0.451091	0.402221	45121	membrane raft
g_210	CC_ARGOT	0.377415	0.393902	98852	lytic vacuole membrane
g_210	BP_ARGOT	0.53391	0.410796	97194	execution phase of apoptosis
g_210	CC_ARGOT	0.351933	0.390838	10008	endosome membrane
g_210	BP_ARGOT	0.445938	0.401662	70201	regulation of establishment of protein localization
g_210	BP_ARGOT	0.444321	0.401487	43065	positive regulation of apoptotic process
g_210	BP_ARGOT	0.440172	0.401034	45	autophagosome assembly
g_210	CC_ARGOT	0.285867	0.382333	5615	extracellular space
g_210	CC_ARGOT	0.151009	0.361125	5829	cytosol
g_210	BP_ARGOT	0.184183	0.367015	60561	apoptotic process involved in morphogenesis
g_211	original_DE	euk	n.d.	-13.2	g_211
g_211	qseq	n.d.	n.d.	n.d.	MAEPESTVINTDVKQKDPSEALVIAVTTRAIFNLEEEHQLYLEKGKEEYVRHQQANQDKPLPPGTAFAFIQAAQYVNEKILESNPAEKGLFDILVLSNNSPESGVRIINSAKHYGLEISKFCFVSDEDSTQYLKSHKVKLFLSADRTDVCNALRRGVSAALVFQQEVQAPSTLLRVAFDGDAVLFSDETDQVFREQGLEGAMQYERAMEAVPIGEGPMKAFAMHLGKIRKKFSQEESPIRTYLVTARSGRDMGIRAIKTLREWGLPIDEAFFMDGAPKGPILAQIQPHIFFDDGLHNIQGAQDVGVPSAWVPSCCX
g_211	DE	0.884275	0.453361	0.607143	Cytosolic 5'-nucleotidase 1A
g_211	BP_ARGOT	12.6398	0.820922	46085	adenosine metabolic process
g_211	MF_ARGOT	10.8463	0.782897	8253	5'-nucleotidase activity
g_211	EC_ARGOT	10.8463	0.782897	EC:3.1.3.5	GO:0008253
g_211	CC_ARGOT	3.57788	0.57935	5829	cytosol
g_211	MF_ARGOT	5.66858	0.650404	287	magnesium ion binding
g_211	MF_ARGOT	2.49863	0.534219	166	nucleotide binding
g_211	BP_ARGOT	4.62124	0.616837	9117	nucleotide metabolic process
g_212	original_DE	euk	n.d.	-13.2	g_212
g_212	qseq	n.d.	n.d.	n.d.	MAKVQRNGRATASPPPASPVVTTTAPQGFLDGFVSHIPLPRWALITVAVAVAVLFLLFLICIIRCCCGKKKPKKKEKVGLLAFSGSTTASLVQPEMEDLEQGPEETGRGRLQYSLEYNFRAQELKVGVKQAADLKAMDNGGTSDPYVIVYLTSDMRKKYETKVYRKTLNPIFNESFTFQVPQAEVSEATLVMQIYDFNRFAKHDIIGEVRVPLASVSLQHIIEQWSDLVVASKVEQERLGEICFSLRYVPSTGKLTVLILEAKKLKRMDSHGLSDPFVKVHLILNKKKWKKKKTSVKKNTLSPYFNEAFVFEVPFNQIQNVDVVISVWDYDKVTKNEPIGKLFLGCRATGNQLRHWSDMLSNPRRPLAQWHSLQPPDVVDKALGLKSHLKLPMTTRX
g_212	DE	2.85808	0.963924	0.346154	Synaptotagmin-1 (Fragment)
g_212	CC_ARGOT	14.5487	0.848133	31045	dense core granule
g_212	MF_ARGOT	13.0685	0.829603	1786	phosphatidylserine binding
g_212	BP_ARGOT	12.6374	0.820873	48791	calcium ion-regulated exocytosis of neurotransmitter
g_212	MF_ARGOT	11.1611	0.789787	5544	calcium-dependent phospholipid binding
g_212	CC_ARGOT	11.1117	0.788714	30672	synaptic vesicle membrane
g_212	BP_ARGOT	11.7429	0.80227	48488	synaptic vesicle endocytosis
g_212	MF_ARGOT	10.9605	0.785409	30276	clathrin binding
g_212	MF_ARGOT	10.1782	0.767936	149	SNARE binding
g_212	MF_ARGOT	6.92305	0.686746	5509	calcium ion binding
g_212	CC_ARGOT	9.00503	0.740422	30424	axon
g_212	MF_ARGOT	0.282244	0.38184	48306	calcium-dependent protein binding
g_212	CC_ARGOT	2.5497	0.536552	5886	plasma membrane
g_212	BP_ARGOT	0.305248	0.384922	7340	acrosome reaction
g_213	original_DE	euk	n.d.	-13.2	g_213
g_213	qseq	n.d.	n.d.	n.d.	MEPSEKQHEDAVAFMQGKKCPPKKNGVTGPIIAQITDYIYLGNLNAAYSGQVLCTNGINNIIDMSSLPSDHSLSIIPCTCGRGGFRHNWSRLRVDTQAFLHGNLHEKRRRAATARRQHLKSAMLQLAVTEIEKEAAAKEVEKQNYLAEHCPPLSLPGSMQELQELCKKLHAKIDSVDEERYDTEVKLQKTNKELEDLSQKLFDLRGKFKRPPLRRVRMSADAMLRALLGSKHKVNMDLRANLKQVKKEDTEKEKDLRDVGDWRKNIEEKSGMEGRKKMFEAGESX
g_213	DE	2.44981	0.928273	0.604651	Troponin I, fast skeletal muscle (Fragment)
g_213	GN	n.d.	n.d.	n.d.	TNNI2
g_213	BP_ARGOT	13.8614	0.843947	3009	skeletal muscle contraction
g_213	CC_ARGOT	12.9257	0.826728	5861	troponin complex
g_213	MF_ARGOT	7.94729	0.714032	3779	actin binding
g_213	BP_ARGOT	13.0457	0.829146	60048	cardiac muscle contraction
g_213	MF_ARGOT	0.351597	0.390797	31014	troponin T binding
g_213	BP_ARGOT	0.141957	0.359407	45893	positive regulation of DNA-templated transcription
g_213	CC_ARGOT	0.0696828	0.343029	5634	nucleus
g_214	original_DE	euk	n.d.	-13.2	g_214
g_214	qseq	n.d.	n.d.	n.d.	MSSAVLRRNSSKQGLQNLIRLTAQWSVEDEEEAARERRRREREKQLRSQAEEGFNGTGSCMESAGSAQENHYDFKPSGNSELEEDEGFSDWSQKLEQRKQRSPQQSYEEEDSGVREAEVKLEQIQLDREGPEEAQEENVVVREEEGLCREEEHVPEQHEEEEERVKQEEKKRRRNEEEETPEKRPKAPSPTSLDEEELCSDHTAVCSTKITDRTESLNRSIKKSNSIKKSQPPLPVSKIDDRLEQYTQAIETSTKAPKPVRQPSLDLPTTSMMVASTKSLWETGEVAAQSAVKTPACKDIVAGDIVSKRSLWEQKGSPKPETSIKSTPSGKKYKFVATGHGQYKRVLIDDAAEQX
g_214	DE	1.84166	0.807513	0.815789	Lymphocyte-specific protein 1 pseudo 1
g_214	GN	n.d.	n.d.	n.d.	LSP1
g_214	MF_ARGOT	7.94738	0.714035	3779	actin binding
g_214	BP_ARGOT	3.94452	0.593079	7165	signal transduction
g_214	BP_ARGOT	0.567333	0.414067	98761	cellular response to interleukin-7
g_214	BP_ARGOT	0.244292	0.376466	6935	chemotaxis
g_214	BP_ARGOT	0.221721	0.373071	6952	defense response
g_215	original_DE	euk	n.d.	-13.2	g_215
g_215	qseq	n.d.	n.d.	n.d.	MLITVSSSIQPTPVRHHASPPPTLPKPKKDNLRLQQLLKKAAKKNAMLAAEQAKSFRSNLSPVNEASSDLERSENVPPAETHKAAAPGPTSLPAHLSIKPITHHRVHSPFRKSKPFVLKVTEQRRIAEHLRLTTPTAESPLHEPAHPARKEQQQPPISPRCTLTSAVSRHQEPRHQHHIRPKATKMWDAILYQMTVNKERKQQAEEKKAQKEEVFFLPRRLPIFLHKPRFDARKLRELAAKPMTKITTVFEVGRYGSRTDKSFNRTASGWSVNX
g_216	original_DE	euk	n.d.	-13.2	g_216
g_216	qseq	n.d.	n.d.	n.d.	MADEEGGYYDEEKPRIKLTAPKIPEGEKVDFDDIQKKRQNKDLIELQALIDSHFEARRKEEEELVALKERIEKRRAERAEQQRIRAEKEKERQARLAEEKARREEEDAKRKAEDDLKKKKALSSMGASYSSYLAKADQKRGKKQTARETKKKVLAERRKPLNIDHLNEDKLRDKAKELWDWLYQLQNEKYDFAEQIKRKKYEILTLRCRLQELSKLX
g_216	DE	2.13329	0.875524	0.645161	Troponin T3, fast skeletal type
g_216	GN	n.d.	n.d.	n.d.	TNNT3
g_216	MF_ARGOT	14.2905	0.846573	30172	troponin C binding
g_216	CC_ARGOT	12.9257	0.826729	5861	troponin complex
g_216	BP_ARGOT	12.5888	0.819879	3009	skeletal muscle contraction
g_216	MF_ARGOT	14.2517	0.846337	31013	troponin I binding
g_216	MF_ARGOT	12.2641	0.813193	5523	tropomyosin binding
g_216	BP_ARGOT	12.071	0.809174	6937	regulation of muscle contraction
g_216	BP_ARGOT	11.5623	0.798429	45214	sarcomere organization
g_216	MF_ARGOT	0.136713	0.358387	48306	calcium-dependent protein binding
g_216	MF_ARGOT	0.0820895	0.346302	3779	actin binding
g_216	CC_ARGOT	0.0282926	0.329123	16020	membrane
g_217	original_DE	euk	n.d.	-13.2	g_217
g_217	qseq	n.d.	n.d.	n.d.	MAARARKAVYPLFQLGGPQLRIFRPDFFMLAVRPGVPQPEDTVQFRVSMEMTKVDIKNYLEKIYNVPVAAVRTRIQYGANNKRNHKNQRVKKPDYKVAYVQLVSX
g_217	DE	1.57426	0.728792	0.594595	Large ribosomal subunit protein uL23m
g_217	GN	n.d.	n.d.	n.d.	MRPL23
g_217	CC_ARGOT	10.3083	0.770888	5762	mitochondrial large ribosomal subunit
g_217	BP_ARGOT	10.0483	0.76497	32543	mitochondrial translation
g_217	MF_ARGOT	3.82839	0.588802	3735	structural constituent of ribosome
g_218	original_DE	euk	n.d.	-13.2	g_218
g_218	qseq	n.d.	n.d.	n.d.	MCAARQMLLLLLAFLAYALDSAAAYGTAETLCGGELVDTLQFVCGDRGFYFSRPVGRNNRRINRGIVEECCFRSCDLALLETYCAKSVKSERDLSATSLAGLPALNKESFQKPSHAKYSKYNVWQKKSSQRLQREVPGILRARRYRWQAEGLQAAEEARAMHRPLISLPSQRPPAPRASPEATGPQEX
g_218	DE	5.12722	0.968076	0.307692	Insulin-like growth factor 2 (Fragment)
g_218	GN	n.d.	n.d.	n.d.	IGF2
g_218	BP_ARGOT	16.2851	0.858289	1905564	positive regulation of vascular endothelial cell proliferation
g_218	MF_ARGOT	15.1342	0.851622	5159	insulin-like growth factor receptor binding
g_218	CC_ARGOT	6.84512	0.684589	5615	extracellular space
g_218	BP_ARGOT	16.014	0.85674	42104	positive regulation of activated T cell proliferation
g_218	MF_ARGOT	11.7211	0.801809	43539	protein serine/threonine kinase activator activity
g_218	CC_ARGOT	0.104894	0.351726	16020	membrane
g_218	BP_ARGOT	15.9109	0.856148	46628	positive regulation of insulin receptor signaling pathway
g_218	MF_ARGOT	10.8033	0.781949	5179	hormone activity
g_218	MF_ARGOT	10.29	0.770473	8083	growth factor activity
g_218	BP_ARGOT	13.4039	0.836296	51147	regulation of muscle cell differentiation
g_218	MF_ARGOT	0.539033	0.411304	30297	transmembrane receptor protein tyrosine kinase activator activity
g_218	MF_ARGOT	0.494722	0.406829	5178	integrin binding
g_218	BP_ARGOT	10.741	0.780571	43410	positive regulation of MAPK cascade
g_218	MF_ARGOT	0.466165	0.403837	5158	insulin receptor binding
g_218	BP_ARGOT	7.82158	0.710782	45944	positive regulation of transcription by RNA polymerase II
g_218	BP_ARGOT	3.94448	0.593077	7165	signal transduction
g_218	BP_ARGOT	0.612246	0.418313	48633	positive regulation of skeletal muscle tissue growth
g_218	BP_ARGOT	0.538193	0.411221	31017	exocrine pancreas development
g_218	BP_ARGOT	0.530991	0.410506	45725	positive regulation of glycogen biosynthetic process
g_218	BP_ARGOT	0.495156	0.406873	40018	positive regulation of multicellular organism growth
g_218	BP_ARGOT	0.486962	0.406024	46622	positive regulation of organ growth
g_218	BP_ARGOT	0.476425	0.404922	45596	negative regulation of cell differentiation
g_218	BP_ARGOT	0.434738	0.400437	1649	osteoblast differentiation
g_218	BP_ARGOT	0.414683	0.398203	51897	positive regulation of phosphatidylinositol 3-kinase/protein kinase B signal transduction
g_218	BP_ARGOT	0.402526	0.396822	45840	positive regulation of mitotic nuclear division
g_218	BP_ARGOT	0.383822	0.394656	32869	cellular response to insulin stimulus
g_218	BP_ARGOT	0.357321	0.391495	51146	striated muscle cell differentiation
g_218	BP_ARGOT	0.302335	0.384538	9887	animal organ morphogenesis
g_218	BP_ARGOT	0.281067	0.381679	122	negative regulation of transcription by RNA polymerase II
g_218	BP_ARGOT	0.130665	0.357186	51781	positive regulation of cell division
g_219	original_DE	bac	n.d.	-13.2	g_219
g_219	qseq	n.d.	n.d.	n.d.	MASAGAHTDERCRQPAFLPGPPPTEVESGSGSAKRDPESRPAPRRAARRRLASRAAGVRGSPGGAPARVLPDAWVVLNAGPRTPRTWRGDDGGGSAARPLRAPLLAGGGAGRSRVGGGRQERACAGSRDRAWAGLAAGPGLCEVAALRGPPALRCAILEAGRRGGAARGRDGPFRGSESWGDRX
g_220	original_DE	euk	n.d.	-13.2	g_220
g_220	qseq	n.d.	n.d.	n.d.	MALWIRSLPLLALLVFSGPGTSYAAANQHLCGSHLVEALYLVCGERGFFYSPKARRDVEQPLVSNPLRGEAGVLPFQQEEYEKVKRGIVEQCCHNTCSLYQLENYCNX
g_220	DE	1.72375	0.774731	0.571429	Insulin
g_220	GN	n.d.	n.d.	n.d.	INS
g_220	MF_ARGOT	10.8031	0.781944	5179	hormone activity
g_220	BP_ARGOT	7.67376	0.706927	6006	glucose metabolic process
g_220	CC_ARGOT	6.77197	0.682554	5615	extracellular space
g_220	BP_ARGOT	3.94441	0.593075	7165	signal transduction
g_220	BP_ARGOT	0.150446	0.361019	3407	neural retina development
g_220	BP_ARGOT	0.119752	0.354947	8283	cell population proliferation
g_220	BP_ARGOT	0.106956	0.352186	43066	negative regulation of apoptotic process
g_220	BP_ARGOT	0.0884122	0.347874	10628	positive regulation of gene expression
g_220	BP_ARGOT	0.0261714	0.32819	10467	gene expression
g_221	original_DE	euk	n.d.	-13.2	g_221
g_221	qseq	n.d.	n.d.	n.d.	MPTPNISTSAAKGFRRAVSELDSKQAEAIMSPRFIGRRQSLIEDARKEREAAAAATDAAESTETIVFEEKDGRAMLNLFFMLKGVKTSPLSRALKVFETFEAKIHHLETRLSRKPREGTAELEYFVRCEVHSSDLNTFISSIKRVAEDVRTTKEDKFHWFPRKICELDKCHHLVTKFDPDLDLDHPGYSDQVYRQRRKSIAEIAFHYKHGDPIPHVEYTAEETATWKEVYSTLKSLYPTHACKEYLEAFNLLEKFCGYNENNIPQLEEVSRFLKERTGFQLRPVAGLLSARDFLASLAFRVFQCTQYIRHASSPMHSPEPDCCHELLGHVPMLADKTFAQFSQDIGLASLGATDEEIEKLATLYWFTVEFGLCRQNGIVKAYGAGLLSSYGELIHSLSD…
g_221	DE	2.46691	0.930499	0.514286	Tyrosine 3-monooxygenase (Fragment)
g_221	GN	n.d.	n.d.	n.d.	TH
g_221	BP_ARGOT	16.1426	0.857476	6585	dopamine biosynthetic process from tyrosine
g_221	MF_ARGOT	15.7876	0.855437	4511	tyrosine 3-monooxygenase activity
g_221	EC_ARGOT	15.7876	0.855437	EC:1.14.16.2	GO:0004511
g_221	CC_ARGOT	11.9504	0.806646	43204	perikaryon
g_221	CC_ARGOT	9.74538	0.757979	48471	perinuclear region of cytoplasm
g_221	CC_ARGOT	9.00507	0.740423	30424	axon
g_221	MF_ARGOT	6.34233	0.670371	5506	iron ion binding
g_221	CC_ARGOT	0.412037	0.397904	5790	smooth endoplasmic reticulum
g_221	CC_ARGOT	0.390497	0.395435	33162	melanosome membrane
g_221	MF_ARGOT	0.221289	0.373004	19899	enzyme binding
g_221	CC_ARGOT	0.2756	0.380927	9898	cytoplasmic side of plasma membrane
g_221	CC_ARGOT	0.222568	0.373201	45202	synapse
g_221	BP_ARGOT	1.15137	0.460502	7617	mating behavior
g_221	BP_ARGOT	1.06273	0.454385	7625	grooming behavior
g_221	BP_ARGOT	1.04799	0.453343	71625	vocalization behavior
g_221	CC_ARGOT	0.10422	0.351575	5634	nucleus
g_221	BP_ARGOT	0.953079	0.446453	35176	social behavior
g_221	BP_ARGOT	0.848521	0.438451	60416	response to growth hormone
g_221	BP_ARGOT	0.627141	0.419687	42418	epinephrine biosynthetic process
g_221	BP_ARGOT	0.563404	0.413688	1990384	hyaloid vascular plexus regression
g_221	BP_ARGOT	0.489092	0.406246	42755	eating behavior
g_221	BP_ARGOT	0.460172	0.403198	45471	response to ethanol
g_221	BP_ARGOT	0.455236	0.402668	42421	norepinephrine biosynthetic process
g_221	BP_ARGOT	0.452566	0.40238	48596	embryonic camera-type eye morphogenesis
g_221	BP_ARGOT	0.427464	0.399633	7612	learning
g_221	BP_ARGOT	0.425122	0.399372	42462	eye photoreceptor cell development
g_221	BP_ARGOT	0.409123	0.397574	1963	synaptic transmission, dopaminergic
g_221	BP_ARGOT	0.395726	0.396041	7613	memory
g_221	BP_ARGOT	0.390721	0.395461	7626	locomotory behavior
g_221	BP_ARGOT	0.369994	0.393021	8016	regulation of heart contraction
g_221	BP_ARGOT	0.346831	0.390212	1666	response to hypoxia
g_221	BP_ARGOT	0.320461	0.386897	7601	visual perception
g_221	BP_ARGOT	0.313546	0.386005	7507	heart development
g_222	original_DE	euk	n.d.	-13.2	g_222
g_222	qseq	n.d.	n.d.	n.d.	MNGGAPPPPPAAASRCRRRPASPELLRCKRRLAFASLSGGGTAAAAVARRNERERNRVRLVNLGFAALRQHVPHGTASKKLSKVETLRSAVEYIRALQRLLDEHDAAAAAFPDGRAGRSAGRAAVGESGGGSGYSSASPCSSEESGYEPVLSPEEQELLDFTSWLGSYX
g_222	DE	1.42887	0.67942	0.652174	Achaete-scute homolog 2
g_222	GN	n.d.	n.d.	n.d.	ASCL2
g_222	BP_ARGOT	10.6034	0.777512	50767	regulation of neurogenesis
g_222	CC_ARGOT	8.77942	0.734929	90575	RNA polymerase II transcription regulator complex
g_222	MF_ARGOT	7.18461	0.693896	977	RNA polymerase II transcription regulatory region sequence-specific DNA binding
g_222	MF_ARGOT	6.94349	0.687309	46983	protein dimerization activity
g_222	BP_ARGOT	10.1363	0.76698	7423	sensory organ development
g_222	MF_ARGOT	6.70689	0.680734	981	DNA-binding transcription factor activity, RNA polymerase II-specific
g_222	BP_ARGOT	8.09122	0.717723	30182	neuron differentiation
g_222	BP_ARGOT	7.80029	0.710229	45944	positive regulation of transcription by RNA polymerase II
g_222	CC_ARGOT	0.084324	0.346864	5737	cytoplasm
g_222	CC_ARGOT	0.0124951	0.320931	16020	membrane
g_222	MF_ARGOT	0.913963	0.443513	43425	bHLH transcription factor binding
g_222	MF_ARGOT	0.635938	0.420491	1217	DNA-binding transcription repressor activity
g_222	MF_ARGOT	0.564503	0.413794	1216	DNA-binding transcription activator activity
g_222	MF_ARGOT	0.308234	0.385313	987	cis-regulatory region sequence-specific DNA binding
g_222	BP_ARGOT	1.15119	0.46049	45626	negative regulation of T-helper 1 cell differentiation
g_222	BP_ARGOT	1.04732	0.453295	61470	T follicular helper cell differentiation
g_222	BP_ARGOT	0.952185	0.446386	2000320	negative regulation of T-helper 17 cell differentiation
g_222	BP_ARGOT	0.948572	0.446117	45629	negative regulation of T-helper 2 cell differentiation
g_222	BP_ARGOT	0.847054	0.438336	35019	somatic stem cell population maintenance
g_222	BP_ARGOT	0.819567	0.436149	2000406	positive regulation of T cell migration
g_222	BP_ARGOT	0.489027	0.406239	122	negative regulation of transcription by RNA polymerase II
g_222	BP_ARGOT	0.476929	0.404975	1666	response to hypoxia
g_223	original_DE	euk	n.d.	-13.2	g_223
g_223	qseq	n.d.	n.d.	n.d.	MRSAGAALPTPGSFPAPLRASAAAARPARCLSTPPPPPPLASPRGRTRRATRARPARASPRATPHPPRASGAWHHSHRRPGEAAVTPRHLSLRVGAQPAKALRTAATPLSPADPAVFWPPTPPRSLPSAHGALRTPSRRRPSERLCGTMGPPSADLCPVLPPPSASFGFLLRPLWGHPRSLLPRGFVRGQX
g_224	original_DE	euk	n.d.	-13.2	g_224
g_224	qseq	n.d.	n.d.	n.d.	MGLRHGMRSTKCQLMAASLCVMLLGLSIATLSTVTRYGLRFSIISNVALESSSYRAIHHTAFYFGVFLSMTLIVAALLSAVATVRESRCLTVTAFFCFALAFCGMLPALCWRYMHSTEVEDSMLDVYDLVYEEVRRNGSSSKRHELTLIHEVFLCCGKHSPLGDTAAVEHRMCHSATVWAAGRDCLQEIHGFLKKHMGFVSTLLGITIGFTVYGMVLTSFLWSSIYFSNNLDRKGKYTLRGRX
g_224	DE	1.22638	0.602949	0.318182	Tetraspanin (Fragment)
g_224	GN	n.d.	n.d.	n.d.	TSPAN32
g_224	CC_ARGOT	0.921502	0.444085	16020	membrane
g_224	BP_ARGOT	0.400381	0.396576	30886	negative regulation of myeloid dendritic cell activation
g_224	BP_ARGOT	0.324825	0.387454	42832	defense response to protozoan
g_224	CC_ARGOT	0.231334	0.374537	98636	protein complex involved in cell adhesion
g_224	BP_ARGOT	0.305197	0.384915	42098	T cell proliferation
g_224	BP_ARGOT	0.289924	0.382882	70527	platelet aggregation
g_224	CC_ARGOT	0.183122	0.366835	43235	receptor complex
g_224	CC_ARGOT	0.166544	0.363956	9986	cell surface
g_224	BP_ARGOT	0.28412	0.382096	50688	regulation of defense response to virus
g_224	BP_ARGOT	0.270552	0.380225	42130	negative regulation of T cell proliferation
g_224	CC_ARGOT	0.0489883	0.336838	71944	cell periphery
g_224	BP_ARGOT	0.217809	0.372465	7229	integrin-mediated signaling pathway
g_224	BP_ARGOT	0.137103	0.358464	7010	cytoskeleton organization
g_225	original_DE	euk	n.d.	-13.2	g_225
g_225	qseq	n.d.	n.d.	n.d.	MGVEGCTKCIKYLLFVFNFIFWLAGGIILGVALWLRHDSQTTNILYLQLGDKQAPNTFYVGIYILIAVGAVMMFVGFLGCYGAIQESQCLLGTFFTCLVILFACEVAAGIWGFVNKDQIAKDVKQFYDQAFQQALMADSDSSNGKAVVRTFHETLDCCGPGAVVGTLTPLWRNDLCSKDFLKGVLQADADCHKKIDELFSGKLYLIGIAAIVVAVIMIFEMILSMVLCCGIRNSSVYX
g_225	DE	1.14012	0.567647	0.727273	Tetraspanin
g_225	GN	n.d.	n.d.	n.d.	CD81
g_225	CC_ARGOT	10.1637	0.767605	16323	basolateral plasma membrane
g_225	BP_ARGOT	9.85426	0.760504	2250	adaptive immune response
g_225	MF_ARGOT	7.03869	0.689923	8289	lipid binding
g_225	MF_ARGOT	1.07935	0.455551	1990459	transferrin receptor binding
g_225	MF_ARGOT	1.02472	0.451684	1618	virus receptor activity
g_225	BP_ARGOT	1.32185	0.471639	1905676	positive regulation of adaptive immune memory response
g_225	MF_ARGOT	0.986118	0.448889	42289	MHC class II protein binding
g_225	BP_ARGOT	1.30785	0.470753	35783	CD4-positive, alpha-beta T cell costimulation
g_225	BP_ARGOT	1.30423	0.470522	34238	macrophage fusion
g_225	CC_ARGOT	1.07216	0.455047	97197	tetraspanin-enriched microdomain
g_225	CC_ARGOT	0.941656	0.445601	1772	immunological synapse
g_225	BP_ARGOT	1.24357	0.466621	2001190	positive regulation of T cell activation via T cell receptor contact with antigen bound to MHC molecule on antigen presenting cell
g_225	MF_ARGOT	0.718426	0.427772	5178	integrin binding
g_225	CC_ARGOT	0.733071	0.42902	70062	extracellular exosome
g_225	BP_ARGOT	1.18069	0.462474	1904352	positive regulation of protein catabolic process in the vacuole
g_225	BP_ARGOT	1.16532	0.461443	14905	myoblast fusion involved in skeletal muscle regeneration
g_225	MF_ARGOT	0.64464	0.42128	43178	alcohol binding
g_225	BP_ARGOT	1.14251	0.459902	2000553	positive regulation of T-helper 2 cell cytokine production
g_225	BP_ARGOT	1.12508	0.458714	2000563	positive regulation of CD4-positive, alpha-beta T cell proliferation
g_225	BP_ARGOT	1.10452	0.4573	2863	positive regulation of inflammatory response to antigenic stimulus
g_225	MF_ARGOT	0.0793022	0.345589	97159	organic cyclic compound binding
g_225	BP_ARGOT	1.08523	0.455961	72675	osteoclast fusion
g_225	BP_ARGOT	1.03239	0.452233	71404	cellular response to low-density lipoprotein particle stimulus
g_225	BP_ARGOT	1.02993	0.452057	50861	positive regulation of B cell receptor signaling pathway
g_225	BP_ARGOT	1.01624	0.451075	50862	positive regulation of T cell receptor signaling pathway
g_225	BP_ARGOT	0.976821	0.448207	1771	immunological synapse formation
g_225	BP_ARGOT	0.958741	0.446873	1905521	regulation of macrophage migration
g_225	BP_ARGOT	0.91149	0.443325	30890	positive regulation of B cell proliferation
g_225	BP_ARGOT	0.880529	0.440951	70863	positive regulation of protein exit from endoplasmic reticulum
g_225	BP_ARGOT	0.806516	0.435099	61462	protein localization to lysosome
g_225	BP_ARGOT	0.784361	0.433295	31623	receptor internalization
g_225	BP_ARGOT	0.725032	0.428336	6959	humoral immune response
g_225	BP_ARGOT	0.705159	0.42663	2449	lymphocyte mediated immunity
g_225	BP_ARGOT	0.673407	0.423853	1903911	positive regulation of receptor clustering
g_225	BP_ARGOT	0.668342	0.423404	43410	positive regulation of MAPK cascade
g_225	BP_ARGOT	0.6396	0.420824	31647	regulation of protein stability
g_225	BP_ARGOT	0.639334	0.4208	72659	protein localization to plasma membrane
g_225	BP_ARGOT	0.486685	0.405996	45944	positive regulation of transcription by RNA polymerase II
g_225	BP_ARGOT	0.438455	0.400846	46718	symbiont entry into host cell
g_226	original_DE	bac	n.d.	-13.2	g_226
g_226	qseq	n.d.	n.d.	n.d.	MAPKGESVDNYDSQDAKRGDATRAGAHFRFLFLSPPLCPLGVVVSVLSRRPRGGRQAGKEGSGCERASGLRGFGVRGASSAAWLPSVLGVSGRGGGCLPRGVEERFGSRRIPVRGRELGPRLARSAAYGPLVLGEALQEGEQSEQSEARMGEADGECASQRDTGLSVLCYAHIAVINVX
g_227	original_DE	bac	n.d.	-13.2	g_227
g_227	qseq	n.d.	n.d.	n.d.	MEEAACALLAAGVRTGAAAPPGGRPQGCGQGTARLRPAPSRLPPHLSLPGAAPEGPGQQRREDTRLWPAAPX
g_228	original_DE	euk	n.d.	-13.2	g_228
g_228	qseq	n.d.	n.d.	n.d.	MSSSSPPGEHRSRSLGRLSLPRKGSMTPGKKPSSLELAESVPNAHYAPLPEAQGGQSPAGSGPGTARERPSHAKSEVVVVGAESTRPPVSLDPRVSIYSLRKPLLSRSNIQGRVYNFLERPTGWKCFVYHFTVRPGLSLGERRPLPAAARPRSRAQLGPARCGALX
g_228	DE	0.776216	0.400787	0.796296	Potassium voltage-gated channel subfamily KQT member 1
g_229	original_DE	bac	n.d.	-13.2	g_229
g_229	qseq	n.d.	n.d.	n.d.	MIQAVFDPSKSVMQLPKEELIGPSGWNSAQDIDLTQFLSPESLPAARARSGHEVDSTDSRDWSWPGCRSGHPGERAPSQPVPPTLSNPEDAVLPPPRLPNILWIDGALSNLVQYQTWRSTMPDSX
g_230	original_DE	bac	n.d.	-13.2	g_230
g_230	qseq	n.d.	n.d.	n.d.	MWCTHTYAWFRRPPPPRCGPIGAQPPGPASAFAAGPEALPPAGVPLTARSRAEGRVTAGSWLPARREGRGHGSAPPGSARSLRGYGVVEAWQRPLSRPHSPRLSAQGRRGGVGGAHRCEVLIX
g_231	original_DE	bac	n.d.	-13.2	g_231
g_231	qseq	n.d.	n.d.	n.d.	MLRAHLHSPGIWEPGTGISCRERSAAVTGGGSGERCGDSRGGDNPASAPRLRPAASGHRGTESPHLRPGLPHHGTSHIAHSYGNTAPCAAAPGGRALRLRPRSGGAARPGPDAVRGGVPAARNFGARRLRAARLSRGCRSAKGX
g_232	original_DE	euk	n.d.	-13.2	g_232
g_232	qseq	n.d.	n.d.	n.d.	MSDVHLSGAAAAPERLAALRALPVPGRSAVCRSLFGPVDHEELGRELRSRLREMGEDDQRRWDYNFHTDTPLPGPGRLRWEEVEGGTVPAFYRETLQVGRHRIPLRRAPPAPPSIVNTTAAAKASGGPGARLSRENRAAPRRRALRPRRSGPTTRITDFFARRKRPAEPKAVAEHPAGGPQPPAAVPAEHTPRKRLRX
g_232	DE	2.33896	0.912295	0.75	Cyclin-dependent kinase inhibitor 1C
g_232	GN	n.d.	n.d.	n.d.	CDKN1C
g_232	MF_ARGOT	14.1068	0.845453	4861	cyclin-dependent protein serine/threonine kinase inhibitor activity
g_232	BP_ARGOT	9.6335	0.75537	45930	negative regulation of mitotic cell cycle
g_232	CC_ARGOT	3.47338	0.575309	5634	nucleus
g_232	CC_ARGOT	0.112727	0.353451	5737	cytoplasm
g_232	BP_ARGOT	1.13265	0.45923	30511	positive regulation of transforming growth factor beta receptor signaling pathway
g_232	MF_ARGOT	0.500345	0.407407	44877	protein-containing complex binding
g_232	BP_ARGOT	1.01642	0.451087	50680	negative regulation of epithelial cell proliferation
g_232	BP_ARGOT	0.518577	0.409262	45893	positive regulation of DNA-templated transcription
g_232	BP_ARGOT	0.490812	0.406424	45892	negative regulation of DNA-templated transcription
g_233	original_DE	euk	n.d.	-13.2	g_233
g_233	qseq	n.d.	n.d.	n.d.	MIYSMTQGRAGPRLRLMVVQGLVIGKLTSRCTEQTLLRLSILVFAGVGLGMVLMKTVWHYCIIVVPLVFAFNIQGTITDSMLTKAVPSSDTGTMLGICASVQPLTRTVGPTLGVILYKQFGVSSFGYLQLIVNVCLFVYLLKSKSPLRETKSHX
g_233	DE	0.722372	0.373636	0.637681	Major facilitator superfamily (MFS) profile domain-containing protein
g_233	CC_ARGOT	8.6968	0.7329	5635	nuclear envelope
g_233	MF_ARGOT	3.24665	0.566328	22857	transmembrane transporter activity
g_233	BP_ARGOT	2.71865	0.544111	55085	transmembrane transport
g_233	CC_ARGOT	0.917997	0.443819	16020	membrane
g_234	original_DE	euk	n.d.	-13.2	g_234
g_234	qseq	n.d.	n.d.	n.d.	MKMQAEVIREGELEKRSDSLFQLWKKKLVVLTKDSLSLFPDGHKRAKGKELGFGSILKVDCVERTGKYIYFTIVTKDRKEIDFRCPDQSCWNASITMALIDFQNKRAIQDFKSRQEMEQAAGTQERRLARAPX
g_234	DE	3.10497	0.968076	0.4	Pleckstrin homology-like domain family A member 2 (Fragment)
g_234	GN	n.d.	n.d.	n.d.	PHLDA2
g_234	BP_ARGOT	10.6392	0.778311	43065	positive regulation of apoptotic process
g_234	MF_ARGOT	10.1817	0.768016	1901981	phosphatidylinositol phosphate binding
g_234	CC_ARGOT	1.53837	0.484793	5737	cytoplasm
g_234	CC_ARGOT	0.92152	0.444086	16020	membrane
g_235	original_DE	euk	n.d.	-13.2	g_235
g_235	qseq	n.d.	n.d.	n.d.	MRSGFLGGGAARVSLRGVWRCWGDAARAGEEVRGSGVRAARGMSSGHEPAAMSTACGWGACGVAVRACRGVGLGRRWGPPAASWVVVILATWMTTLARPALPGGGPSLPPPSPGSGGGSRREGRVRSERLLRLSVRSARFQSDPAALQSGAALLFDRSHDLLPPQRAPEGX
g_236	original_DE	bac	n.d.	-13.2	g_236
g_236	qseq	n.d.	n.d.	n.d.	MLTIRRRGARPISGRARRREGGRAARAGRGVRGAVGARGERVMADGVGGLAVVTLKRQRARAEEGVQDGGGRPLCAGGEGPSAGSCPX
g_237	original_DE	bac	n.d.	-13.2	g_237
g_237	qseq	n.d.	n.d.	n.d.	MAAAPAEQGRCAEGVAAHPRGPGEARGGVLRGCHGAVTALQAFAGMMSWPRPLSERQVGAVTSGGGAGGAAERRFCQAAREVLGGARNGGQRGASGHEMAAGTSPRSAPSAVGTAAATPQHTGCVAGLPPPFPPRRVSVVQLFIFLEGFLLFFHYLLYLSLSSSVWKEGPGSPVANGNPEYQSYKSEIPRWYVRGWKFVSVQLRFX
g_238	original_DE	bac	n.d.	-13.2	g_238
g_238	qseq	n.d.	n.d.	n.d.	MATGPRLLVPPSARLPASRGAIGRASRGWARRDGRHFADSGQASTPPPGGPGTHQQQQQQSHRTHSHRGARPSPAAARCPPLTAQLKIRHLEPPSYRFPPHSSPRPAVEPERASGSTYATVSKALFX
g_239	original_DE	bac	n.d.	-13.2	g_239
g_239	qseq	n.d.	n.d.	n.d.	MGQRWETRSALPGRGEPGPERRRLQHAAPRHAARIAAGPQSVGCGRGHAWAPRSRTELRAAAGQLLGEAAAGNTKRLIQPRX
g_240	original_DE	bac	n.d.	-13.2	g_240
g_240	qseq	n.d.	n.d.	n.d.	MCSPDTEAGALPASRVHAERNDQPCSKRNPELLQARMTALSALVAAPRGRQDLTRDPVQHRDHSVTRPHAFDCSCLSCASHIPRVDVEPGQELKQNFTAPPPPX
g_241	original_DE	bac	n.d.	-13.2	g_241
g_241	qseq	n.d.	n.d.	n.d.	MGSEVRDPNSGTGSCFSSSPIPALSARSAAPRAFLPAFPCALFAPQHRREAQPVGRKREALLTARSPRNFPLRAELLQNVPLGLPGVRAKPDSX
g_242	original_DE	euk	n.d.	-13.2	g_242
g_242	qseq	n.d.	n.d.	n.d.	MGPLPRPSRRGIGCREEGLFRPRGGGPSRRRPSRSPPHLAPRRASPGRRRLPAPPRPQPRSARGRARRRRRLGGRRRGGTPGGAGRAARPCLRGRRRRAERPCARRGAFSATMRRLPLLPPCPLLLLLLLPAEVRPRRGLGGPSGRGAARAPHLPPRGGPWPRAGVRPAGGSGFVPPRPHAERPGGAAARAGAHLGPAAASPRGPSPARRRFEGRPLVGTGGDAEEAGAGGADRAERAAGVRLAGSCVTESGDGSGPLGIAACSGREPASX
g_243	original_DE	bac	n.d.	-13.2	g_243
g_243	qseq	n.d.	n.d.	n.d.	MLSSFPRRRAQGGYKSPRTAPHLQPGHICAGLSVHGGQRGTGPATGASLQQRLLPPGCRFHSCFLLRHLPLSPSEWKQECAWAAAERRAVSQPPRCKEGERGRRRGPAFPGX
g_244	original_DE	bac	n.d.	-13.2	g_244
g_244	qseq	n.d.	n.d.	n.d.	MIIKFHVQAASRCSSRRAARSSPVAPRSVTYHAAPPPIRQRGSRAAPLQESAAKLLLTSGWSELAAAFASRAASPNRPLLSERAQMKARSGPLPRPQPPAHQRGRCRRSPSGCGEAAHLRVPSFPGGPGCRTSARAAGRDGKRPKEKRGAAQPYLSSSAPPPIPASHLRCGGSTKAEPLAAAGRGRRSSTRRALPAPRSPQPGIAPHPRLSARPEPLRPLKPLQLASRLSPQRRPPADTRTHARAAGGADPSARQGRVGGRCRX
g_245	original_DE	euk	n.d.	-13.2	g_245
g_245	qseq	n.d.	n.d.	n.d.	MFAITHILYSSAFGMKPLDLKAGLMMGLISSSCYAFLYSYLSGPFTYLVAVYIALIGFMGWRAVAGMQLCNDLWTWTKLSACIGAMLFMVSDLTIAVNKFCFPVPYSRVIIMATYYAAQMLIALSAVESRDEEDFKKRSX
g_245	DE	0.693383	0.338315	0.833333	lysoplasmalogenase
g_245	MF_ARGOT	2.25086	0.522542	16787	hydrolase activity
g_245	EC_ARGOT	2.25086	0.522542	EC:3.-.-.-	GO:0016787
g_245	CC_ARGOT	0.920455	0.444005	16020	membrane
g_246	original_DE	euk	n.d.	-13.2	g_246
g_246	qseq	n.d.	n.d.	n.d.	MDAPRRRYGVPRHRGECGPCGGRAGGAGPAPSHGRLPPTPPPPLPPYPLPPYPLPPYPLPPYPLPECRSTACPAVAVLRRAAAYVRLGSPTCPKASLRSLWLLPRALVEPRARYASCPRGFAPSCPDVLSWQLGRRCTRSRTVLCRPLGSVPGAGLALPPCSGVSSSSVLSFVEDVWRRVLTPRVEGMLEEDKALSRTAEKLCCHPLLRMLLFLESKGFDX
g_247	original_DE	bac	n.d.	-13.2	g_247
g_247	qseq	n.d.	n.d.	n.d.	MPSAKGNGDLARDTDRKAVLGASACQCQRGRAGRAPAQCRAPPPPSPTGWRRGLSGSTRPIGLTRSETWQTRGSRANKSAPPTFKREYRRLRTRHRGVPRPGGPRRHPAKPREGARRFLRARPGRVPERRPRIPNASSPLATPRLTGTAFSPCCSEAITRMLWKSMAGSATGLRHPPRSPSPAEAPPRRSTPLSFRPQPPPPYIASPRAGVMAARHFRWAGPASRSPDAGGLISAVVIAPALLPVLQAPADVCMGWLCAAYRPLLTHAAFFSPQSX
g_248	original_DE	euk	n.d.	-13.2	g_248
g_248	qseq	n.d.	n.d.	n.d.	MANGAQREDLGIQLEDQVQDPGDQAAILAWDPEGQGVSQAQDPSGRAAARPQDREGQAAAQAWDLGDWAVAQAWDLEGQVAAQALDLGVQVAAQAPAQEGRPTAQIQHLGDWAAAWEQGRGGQESAQVQDLGDRAAAREQGREGQESAQAQDLGDLALQLX
g_249	original_DE	bac	n.d.	-13.2	g_249
g_249	qseq	n.d.	n.d.	n.d.	MEKEKFGCALLTAVTSSTVRSLNLYWERETKIHTEAFRLGGPALPFRFSQRRTAGQRTSANPRRHEPLPAPSRTLLSCFRSASAENAMAAASQAAPRLQPAPPRPRSCPASYRSCGRHAACGARGFCWKAEGSPYTVGRDSPX
g_250	original_DE	bac	n.d.	-13.2	g_250
g_250	qseq	n.d.	n.d.	n.d.	MAFSESQLKKMLAKVGGGPARREAILSPSAESSGRGGCRRSAPYCPSVGRGSRTPPPPRRGALCGTRPX
g_251	original_DE	euk	n.d.	-13.2	g_251
g_251	qseq	n.d.	n.d.	n.d.	MAEWNGCWNASEAARGSCGRCAAPLRQTPTLRAAQRSPHRSRRAQSPSAGARRVTVTARCSASRTAARSAHPPAALRPDVSAGTSPPPRPARRTSAARPLLKAAAASPAPPRPPPRYRRKTPGRCRLGRSLRGRGGGGGPRRGRCGGRWLPREDSGRGSTAERSPRAHLRFLSSLLECLRALLGRERLARGGYSPSNHVDGLKKKIKX
g_252	original_DE	bac	n.d.	-13.2	g_252
g_252	qseq	n.d.	n.d.	n.d.	MQARRARPERRRRPREPRNGRAKGHGVTRWAGPAAPDLRALSPVRAARGAQGSAADRPRYPRRHPQCPPPPLARRAAYRGAGAAPGGRALRAAGRPGRARGGAGAKGVGPPPPPLGPWGGQGRARDRNGPRGTGRAGEAVSRDEDAGRRSTSSAITKAEGGAPGGSAVPPPPHPIPPRPVLPSLPLSPGPAVRGCRSSPAMGPAVPPLRSQVGAAALRGRGLPSASARGGRGRRASASRGRARQARVTQLPAARSAX
g_253	original_DE	euk	n.d.	-13.2	g_253
g_253	qseq	n.d.	n.d.	n.d.	MASGPAVLTALPAAVPDSCSHVLAELECLDPLLAALRLDSARLKCTCITVSRKWLALGTSGGGLNLIQKDGWKQRLFLTHKEGAISRVACCLHDEDYVAVATSQGLVVVWELNQERRGKPERIYVSSEHKGRKVTALCWDTAALRVFWKGTVGFNKLCVKRFCPTFVQTSEIX
g_253	DE	2.47278	0.931247	0.763636	HPS5 biosis of lysosomal organelles complex 2 subunit 2
g_253	GN	n.d.	n.d.	n.d.	HPS5
g_253	BP_ARGOT	13.6695	0.841538	48066	developmental pigmentation
g_253	CC_ARGOT	1.53724	0.484727	5737	cytoplasm
g_254	original_DE	euk	n.d.	-13.2	g_254
g_254	qseq	n.d.	n.d.	n.d.	MSVAPVRGRKTKRISTQLEQKKEEEGKVEEADTVRGPEEWLRDPGEAPLSPGEGPSIRPQSPTPRRVRSPERQGAEQDIVTIVDRSLKMNEIRGLRKDFSRHPNEPIVTWLLRCWDNGANSVWLDSREARQLGGIARDSAIDRGISTCQNGSFTLWKRMLLAVKERYPFKDDLMLEKKKWTDMEEGISYLREYAVVEMLHSPTFIPDEPDQEHDPERVRCTPNMWRTFTKTAPERHASTFAAMYGRGERRPVINDLVNKLQDYELHLTPLRACVSAITKVVEKLDRMESKQEDIIDELSTMLNADGSMVVPDTSDEDQNSQNCLLEELINLVSSQPASSNISAIKRRRPPARANDNRRTTSRLALWRFLRDRGEDMEKWHDQPTPALQARVKELQDRST…
g_255	original_DE	euk	n.d.	-13.2	g_255
g_255	qseq	n.d.	n.d.	n.d.	MPSSHQGTKSIYIHGVTGGSQELTMLEAEISFTGKDWQKHPIVTGPGAPCILGIDYLRMGYFKDPKGYRWAFGIAAVDTEGVKQLSVLPGLSEDPSVVGLLRVKEQQVPIATKTVHRRQYRTNRDALLPIHELIRQLESQGVISKTHSPFNSPIWPVRKASGEWRLTVDYRDLNEVTPPLSAAVPDMLELQYELESKAAKWYATIDIANAFFSIPLATECRPQFAFTWRGIQYTWNRLPQGWKHSPTICHGLIQTVLEQGSAPEHLQYIDDIIVWGNTAREVFEKGEEIIQILLRAGFAIKRSKVKGPAQEIQFLGIKWQDGRRYIPMDVINKITAMSPPTNKKETQSFLGIVGFWRMHVPNYSLIVSPLYQVTRKKNDFTWGPEQQQAFEQIKQEIAR…
g_255	DE	0.870723	0.446907	0.785714	ribonuclease H
g_255	MF_ARGOT	9.21736	0.745529	4523	RNA-DNA hybrid ribonuclease activity
g_255	EC_ARGOT	9.21736	0.745529	EC:3.1.26.4	GO:0004523
g_255	BP_ARGOT	4.26804	0.604672	15074	DNA integration
g_255	BP_ARGOT	0.410467	0.397726	9987	cellular process
g_255	BP_ARGOT	0.152413	0.361386	6310	DNA recombination
g_255	MF_ARGOT	2.47634	0.533192	46872	metal ion binding
g_255	MF_ARGOT	2.16535	0.518364	3676	nucleic acid binding
g_256	original_DE	euk	n.d.	-13.2	g_256
g_256	qseq	n.d.	n.d.	n.d.	MDRNPSPPSSEAEEEGDAVGSTVYSKHWLFSILTRLIELISPEKSEPGGNPEGIQTELDEEMENDICKVWDMSMDEDVALFLQEFNAPDIFMGVFAKSKCPRLTEICVGILGNMACFQDICMSISKDENLGQVLLQRLCDSDSPTLLETSRLLLTCLSQPEVANIWVERIRDSPSVYDCVCFIMSSSTNVELLVKVGEVVDKLFDLDEELMLNWIKSGTCQSVGPSTDDSPEELPDFKIVPCILEAAKQVRSDSPEGLDVYMHILQLLTTVDEGIQAIVQAPDGGKETWTLLYDLICHELCQPDDPPIIVQEQKTVLASILSVLSAIFASQTEQEYIKMRKSKWRVSLKFCARLMERLLKTX
g_256	DE	1.88988	0.820044	0.772727	Serum amyloid A like 1
g_256	GN	n.d.	n.d.	n.d.	SAAL1
g_256	BP_ARGOT	18.1861	0.868804	1901647	positive regulation of synoviocyte proliferation
g_256	CC_ARGOT	6.81731	0.683817	5654	nucleoplasm
g_256	CC_ARGOT	0.0556921	0.338966	5576	extracellular region
g_256	CC_ARGOT	0.0280443	0.329016	16020	membrane
g_257	original_DE	euk	n.d.	-13.2	g_257
g_257	qseq	n.d.	n.d.	n.d.	MQAVPRRGGSLEGAPCPREAGGQLSKSNYMMIEDNKENKDHVPERGRTAIIFSLKNEVGGLVKALKLFQEKHVNLVHIESRKSKRRNSEFEIFVDCDSNREQLNEIFQLLKSHVSTVSMNPTEHFNGQEDDMENIPWYPKKISDLDKCANRVLMYGSDLDADHPGFKDNVYRKRRKYFADLAMNYKHGDPIPKIEFTEEEIKTWGTVYRELSKLYPTHACREYLKNLPLLTKYCGYREDNIPQLEDVSRFLKERTGFTIRPVAGYLSPRDFLAGLAFRVFHCTQYVRHSSDPLYTPEPDTCHELLGHVPLLAEPSFAQFSQEIGLASLGASDEAVQKLATCYFFTVEFGLCKQEGQLRVYGAGLLSSISELKHSLSGSAKVKPFDPKVTCKQECLITTF…
g_257	DE	2.39316	0.920444	0.540541	tryptophan 5-monooxygenase (Fragment)
g_257	GN	n.d.	n.d.	n.d.	TPH1
g_257	MF_ARGOT	15.6728	0.854773	4510	tryptophan 5-monooxygenase activity
g_257	EC_ARGOT	15.6728	0.854773	EC:1.14.16.4	GO:0004510
g_257	BP_ARGOT	14.3158	0.846726	42427	serotonin biosynthetic process
g_257	CC_ARGOT	7.39839	0.699644	43005	neuron projection
g_257	CC_ARGOT	0.0801615	0.34581	5737	cytoplasm
g_257	MF_ARGOT	6.34232	0.670371	5506	iron ion binding
g_257	BP_ARGOT	6.33401	0.670131	9072	aromatic amino acid metabolic process
g_257	BP_ARGOT	1.09675	0.456762	2576	platelet degranulation
g_257	BP_ARGOT	0.851405	0.438678	1900046	regulation of hemostasis
g_257	BP_ARGOT	0.761061	0.431371	45600	positive regulation of fat cell differentiation
g_257	BP_ARGOT	0.739384	0.429554	46849	bone remodeling
g_258	original_DE	bac	n.d.	-13.2	g_258
g_258	qseq	n.d.	n.d.	n.d.	MRAFCTRSLANSRSHSGTEPLQVQQPNSRRCRSDRLQAGARAEAGPHPGPPLPPRPRRVGKGASPMEAVLRAWVGGREGCAGASARPAAARWRREEGEGGLREAPPVGLRPAGLPGPWNERREDGLPSLPERWEAX
g_259	original_DE	bac	n.d.	-13.2	g_259
g_259	qseq	n.d.	n.d.	n.d.	MARAAPQLPQLEAARRELAHLTGCPKLLTGLARQLRPQAGARACVAGTCGLCTPSGRDVEQQQLPAAQRAALLGRRSTPHSEAANQRAASYX
g_260	original_DE	euk	n.d.	-13.2	g_260
g_260	qseq	n.d.	n.d.	n.d.	MHQRIKASVLKLLFNISLISFFPQYVAFASLFFILVSITTFCLETHERFNPIVNKTETEFIGNDTQVRHYREAETEAFLTYIEGVCVVWFTFEFLMRVTFCPNKVEFIKNSLNIIDFVAILPFYLEVGLSGLSSKAAKDVLGFLRVVRFVRILRIFKLTRHFVGLRVLGHTLRASTNEFLLLIIFLALGVLIFATMIYYAERIGAKPNDPSASEHTHFKNIPIGFWWAVVTMTTLGYGDMYPQTWSGMLVGALCALAGVLTIAMPVPVIVNNFGMYYSLAMAKQKLPKKKKKHIPRPPQLGSPNYCKSVVNSPHHSTQSDTCPLAQEEILEINRAGRKPLRGMSIX
g_260	DE	1.59909	0.736762	0.788462	Potassium voltage-gated channel subfamily C member 1
g_260	GN	n.d.	n.d.	n.d.	KCNC1
g_260	CC_ARGOT	14.0432	0.845064	32809	neuronal cell body membrane
g_260	MF_ARGOT	13.0911	0.830058	5251	delayed rectifier potassium channel activity
g_260	BP_ARGOT	12.0809	0.80938	1508	action potential
g_260	CC_ARGOT	12.5816	0.819733	32590	dendrite membrane
g_260	BP_ARGOT	7.96445	0.714474	71805	potassium ion transmembrane transport
g_260	CC_ARGOT	11.8761	0.805085	43679	axon terminus
g_260	CC_ARGOT	11.1118	0.788714	42734	presynaptic membrane
g_260	CC_ARGOT	10.8327	0.782597	8076	voltage-gated potassium channel complex
g_260	BP_ARGOT	3.4728	0.575287	51260	protein homooligomerization
g_260	CC_ARGOT	9.515	0.75259	45211	postsynaptic membrane
g_261	original_DE	euk	n.d.	-13.2	g_261
g_261	qseq	n.d.	n.d.	n.d.	MGQGDESDRIVINVGGTRHQTYRSTLRTLPGTRLAWIAEPDAHSHFDYDPRTDEFFFDRHPGVFAHILNYYRTGKLHCPADVCGPLYEEELAFWGIDETDVEPCCWMTYRQHRDAEEALDSFGGAPLDSSAEDGDIDGTGDSGDGEEELEMTKRLALSDSPDGRSGGFWRRWQPRIWALFEDPYSSRYARVSYATSTFTKCFPPWSHLCPVAPSLVPQAEX
g_261	DE	0.741367	0.383287	0.482759	BTB domain-containing protein
g_261	CC_ARGOT	14.0359	0.84502	32809	neuronal cell body membrane
g_261	MF_ARGOT	13.0843	0.829921	5251	delayed rectifier potassium channel activity
g_261	BP_ARGOT	12.0746	0.809249	1508	action potential
g_261	BP_ARGOT	10.3159	0.771059	51260	protein homooligomerization
g_261	CC_ARGOT	12.5751	0.819599	32590	dendrite membrane
g_261	CC_ARGOT	11.87	0.804955	43679	axon terminus
g_261	BP_ARGOT	7.96031	0.714368	71805	potassium ion transmembrane transport
g_261	CC_ARGOT	11.106	0.788588	42734	presynaptic membrane
g_261	CC_ARGOT	10.827	0.782473	8076	voltage-gated potassium channel complex
g_261	CC_ARGOT	9.51005	0.752473	45211	postsynaptic membrane
g_262	original_DE	bac	n.d.	-13.2	g_262
g_262	qseq	n.d.	n.d.	n.d.	MKESCGDSPQHRRRHPGAANRAGSGTEGTAPAAGQLQTLAAGRPRRPRGAAGARTRRVAAGGSGAPARAGGRAAPSRRAAAAAAGGAAAASRVPAARTGPDPGQAARSARRGAQEEEAEARRCPFSTSGAPPPPSGGAGPPPPPRPRSPASAAAALPEHVPAAPSRPTAAAAASAAPAPLTEPTAARPRQPRGAGAERERALTRSGARLRSACRRAAVPSRARRPPCSLGX
g_263	original_DE	euk	n.d.	-13.2	g_263
g_263	qseq	n.d.	n.d.	n.d.	MDLLGPMEMMEGSLCSFAATDDFYDDPCFNTSDMHFFEDLDPRLVHVGGLLKPEEHPHHHGHHHGHPHEEEHVRAPSGHHQAGRCLLWACKACKRKTTNADRRKAATMRERRRLSKVNEAFETLKRCTSTNPNQRLPKVEILRNAIRYIESLQALLREQEDAYYPVLEHYSGESDASSPRSNCSDGMMEYSGPPCSSRRRNSYDSSYYTESPNDPKHGKSSVVSSLDCLSSIVERISTDNSTCPILPPAEAVAEGSPCSPQEGASLNDSGAQIPSPTNCTPLPQDSSSSSNPIYQVLX
g_263	DE	2.12324	0.873492	0.423077	Myogenic factor (Fragment)
g_263	GN	n.d.	n.d.	n.d.	MYOD1
g_263	BP_ARGOT	15.7423	0.855175	48743	positive regulation of skeletal muscle fiber development
g_263	MF_ARGOT	7.50719	0.702537	978	RNA polymerase II cis-regulatory region sequence-specific DNA binding
g_263	CC_ARGOT	3.47394	0.575331	5634	nucleus
g_263	MF_ARGOT	6.94365	0.687314	46983	protein dimerization activity
g_263	MF_ARGOT	6.79923	0.683314	981	DNA-binding transcription factor activity, RNA polymerase II-specific
g_263	CC_ARGOT	0.460258	0.403207	791	euchromatin
g_263	BP_ARGOT	15.0161	0.850924	45663	positive regulation of myoblast differentiation
g_263	CC_ARGOT	0.307742	0.385249	30016	myofibril
g_263	CC_ARGOT	0.244513	0.376499	5667	transcription regulator complex
g_263	BP_ARGOT	14.6614	0.848811	35914	skeletal muscle cell differentiation
g_263	MF_ARGOT	0.51082	0.408477	43425	bHLH transcription factor binding
g_263	CC_ARGOT	0.170122	0.364589	70013	intracellular organelle lumen
g_263	MF_ARGOT	0.423583	0.399201	1990841	promoter-specific chromatin binding
g_263	MF_ARGOT	0.387872	0.39513	16922	nuclear receptor binding
g_263	MF_ARGOT	0.340275	0.3894	31490	chromatin DNA binding
g_263	MF_ARGOT	0.321345	0.38701	31625	ubiquitin protein ligase binding
g_263	MF_ARGOT	0.315505	0.386259	1216	DNA-binding transcription activator activity
g_263	MF_ARGOT	0.258383	0.378507	42802	identical protein binding
g_263	BP_ARGOT	5.75134	0.652918	6357	regulation of transcription by RNA polymerase II
g_263	BP_ARGOT	0.638287	0.420704	7518	myoblast fate determination
g_263	BP_ARGOT	0.595634	0.416761	2000818	negative regulation of myoblast proliferation
g_263	BP_ARGOT	0.590898	0.416315	43503	skeletal muscle fiber adaptation
g_263	BP_ARGOT	0.576332	0.414931	43415	positive regulation of skeletal muscle tissue regeneration
g_263	BP_ARGOT	0.552681	0.412645	14908	myotube differentiation involved in skeletal muscle regeneration
g_263	BP_ARGOT	0.523053	0.409712	1901741	positive regulation of myoblast fusion
g_263	BP_ARGOT	0.451545	0.40227	48741	skeletal muscle fiber development
g_263	BP_ARGOT	0.450934	0.402204	71392	cellular response to estradiol stimulus
g_263	BP_ARGOT	0.450468	0.402154	7520	myoblast fusion
g_263	BP_ARGOT	0.442657	0.401305	71385	cellular response to glucocorticoid stimulus
g_263	BP_ARGOT	0.390676	0.395456	71453	cellular response to oxygen levels
g_263	BP_ARGOT	0.380513	0.394268	71356	cellular response to tumor necrosis factor
g_263	BP_ARGOT	0.343275	0.389772	381	regulation of alternative mRNA splicing, via spliceosome
g_263	BP_ARGOT	0.269407	0.380065	9267	cellular response to starvation
g_263	BP_ARGOT	0.255558	0.378103	6366	transcription by RNA polymerase II
g_263	BP_ARGOT	0.216808	0.372309	45893	positive regulation of DNA-templated transcription
g_264	original_DE	euk	n.d.	-13.2	g_264
g_264	qseq	n.d.	n.d.	n.d.	MAAPAMAEPRSKRPRVTLPACPAHRPLPGSRVRQSFPAAVEEGLCGVTSALLELAYSLQALGEYFDQSHVALPNVSKFFLHQALEERKAAEALMKYQQERGGHYCSKTIQKPNCDYAVGLMKALELAMVQWKTLTRYFEELYALSIENADPHSASTIKKQFIGPKIRKIKMMGDLLTNARRLDFAVPAAPSRRLLGQASPSRSAPRLSPSSGSRARAPPDTSQLRGTTRRCRHPAPAAQPVVRALRRGSDRTAPGRRHAAGCRQKARGSSPGASLRDVGRSAPRAARRARSLFPQLRRGGSLPFPPLPRAPPTAAGRYSPLQAAAPRRSPDPVAALASPPRLVALPPLPAPSRTPPRLPCGRGRSSGRGGAEAPGAPSAAAPSPPLRAPPRPAGGSGIN…
g_265	original_DE	bac	n.d.	-13.2	g_265
g_265	qseq	n.d.	n.d.	n.d.	MEARLLLGALLCAGLSPAWSPRGASAQPPAGVDLPLLSPGSAGGPWRGDGLGAAVQESGMTVHNASATTVSLSQSRRFHSMKCGPSSKX
g_266	original_DE	bac	n.d.	-13.2	g_266
g_266	qseq	n.d.	n.d.	n.d.	MLRCYAGCGRCAKRLRLRGRALAGWEARPSRLSVPAAVNGSHRPAVCEMNLQPVLTQQELTPSRLPGPGRQVCLX
g_267	original_DE	euk	n.d.	-13.2	g_267
g_267	qseq	n.d.	n.d.	n.d.	MCAEAEAAPGCARGPVMALAFCGDEGNSTAYNVDHGVLNNGCFVDALNVVPHVFLLFITFPILFIGWGSQSSKVHIHHSTWLHFPGHNLRWILTFILLFVLVCEIAEGIVSDGVSESRHLHLYMPAGMAFLAAITSVVYYHNIETSNFPKLLIALLFYWTLAFITKTIKFVKFCDNGVGFSQLRFCLTGLLVVLYGMLLAVEINVIRVRRYVFFKTPKEVKPPEDLQDLGVRFLQPFVNLLSKGTYWWMNTFIKTAHKKPIDLKTIGKLPIAMRALTNYIRLNEAFEAQKNKRPSAPQGSGSIWRALCCAFGRPLLLSSTFRILADLLGFAGPLCISGIVHNVGKGNNTIRPQVFLFCSFEEGEX
g_267	DE	1.03085	0.520589	0.731707	ATP binding cassette subfamily C member 8
g_267	MF_ARGOT	15.4258	0.853335	8281	sulfonylurea receptor activity
g_267	BP_ARGOT	7.52923	0.703121	6813	potassium ion transport
g_267	CC_ARGOT	0.921497	0.444084	16020	membrane
g_267	MF_ARGOT	3.96039	0.593659	42626	ATPase-coupled transmembrane transporter activity
g_267	EC_ARGOT	3.96039	0.593659	EC:7.2.2.-	GO:0042626
g_267	MF_ARGOT	3.0517	0.558351	5524	ATP binding
g_267	BP_ARGOT	1.7699	0.497871	55085	transmembrane transport
g_268	original_DE	euk	n.d.	-13.2	g_268
g_268	qseq	n.d.	n.d.	n.d.	MLSRKGIIPEEYVLTRLAEDVPDHARYRARERRARFVGKNGACNVAHKNIREQGRFLQDVFTTLVDLKWPHTLLIFTMSFLCSWLLFGMVWWLIAFAHGDLDHGTRLQRTPATEVPDDFVPCVTSIHSFTSAFLFSIEVQVTIGFGGRMVTEECPAAILVLIVQNIVGLVINAIMLGCIFMKTSQAHRRAETLIFSKHAVIALRDGKLCFMLRVGDLRKSMIISATIRMQVVKKTSSLEGEVVPLNQIDIQMENPVGGNSIFLVSPLIIYHVIDKNSPLYDISPTNLHHHEDLEIIVILEGVVETTGITTQARTSYLADEILWGQRFVPIVAEEDGRYSVDYSKFGNTVKVPTPSCTARQLEEDKSIMDTVPFSPRNTIRKRSVKLKPKFTISDEPSX
g_268	DE	2.77627	0.959703	0.693548	ATP-sensitive inward rectifier potassium channel 11 (Fragment)
g_268	GN	n.d.	n.d.	n.d.	KCNJ11
g_268	MF_ARGOT	16.292	0.858328	15272	ATP-activated inward rectifier potassium channel activity
g_268	BP_ARGOT	11.5757	0.798716	34765	regulation of monoatomic ion transmembrane transport
g_268	CC_ARGOT	6.98248	0.688382	34702	monoatomic ion channel complex
g_268	BP_ARGOT	11.393	0.7948	1990573	potassium ion import across plasma membrane
g_268	CC_ARGOT	2.5497	0.536552	5886	plasma membrane
g_268	CC_ARGOT	0.164137	0.363526	5737	cytoplasm
g_268	MF_ARGOT	2.05792	0.512996	99508	voltage-gated monoatomic ion channel activity involved in regulation of presynaptic membrane potential
g_268	MF_ARGOT	1.74054	0.496261	30506	ankyrin binding
g_268	MF_ARGOT	1.30253	0.470414	44325	transmembrane transporter binding
g_268	BP_ARGOT	2.16878	0.518533	1904638	response to resveratrol
g_268	BP_ARGOT	1.78475	0.498679	99505	regulation of presynaptic membrane potential
g_268	MF_ARGOT	0.32561	0.387554	5524	ATP binding
g_268	BP_ARGOT	1.77423	0.498107	61762	CAMKK-AMPK signaling cascade
g_268	BP_ARGOT	1.73784	0.496113	2931	response to ischemia
g_268	BP_ARGOT	1.69927	0.493977	46676	negative regulation of insulin secretion
g_268	BP_ARGOT	1.64296	0.490815	3229	ventricular cardiac muscle tissue development
g_268	BP_ARGOT	1.53154	0.484393	8340	determination of adult lifespan
g_268	BP_ARGOT	1.47349	0.480954	33198	response to ATP
g_268	BP_ARGOT	1.28897	0.46955	1508	action potential
g_268	BP_ARGOT	1.23346	0.465961	1666	response to hypoxia
g_268	BP_ARGOT	1.05103	0.453559	9410	response to xenobiotic stimulus
g_268	BP_ARGOT	0.928726	0.44463	31669	cellular response to nutrient levels
g_268	BP_ARGOT	0.871391	0.440242	6915	apoptotic process
g_268	BP_ARGOT	0.849583	0.438535	50877	nervous system process
g_268	BP_ARGOT	0.818763	0.436085	6006	glucose metabolic process
g_269	original_DE	bac	n.d.	-13.2	g_269
g_269	qseq	n.d.	n.d.	n.d.	MTAHQAPPLPGSPPSAAGGEGCPHTSPRAAAAPTPLLQSRTCHRALASGGPLRRITACQQEGDATLRPGGVRGAAASQTETARRGEEGSSSRGSRRGPAGHDAAARWRSGGPGSRFHGHRSRPQEGSDWPTLTPSRASRRALIGQRRVRRRDSARKRDALLSAEVRGGCCEAGPPGPGVSGRRAGARVAREVPQPLGLGCVRCVRAGALPKCKFAVAGGGYRGWALSEGVLSPPLPAGALCRPAAGGACVGKIIFREX
g_270	original_DE	bac	n.d.	-13.2	g_270
g_270	qseq	n.d.	n.d.	n.d.	MNPVDAAVSATDAVHQPVPGSLSSSSTKEVFPGPLAALRRWRCGDRPQEPQTPRAERCWWLLRSPAHLFTLAYFTDHPSPPPVHRTTNSYKQHRASLPPSVPSQSNKTQTANKNCYLRAPYPRSRDQRQPPPAPTAVTPRCPPAGGPALTGTPAPSAPLRRAAGAGQRRERLRGGAGPCRQGSAASRAQTRQDSGRRHAEGRGAATPGEREDAGGRARSGSTSRHPPRSAAAPQPRPFRFLPPAARLQAARSPLVAPLSPRRRHRAPTSGPGPHRWRTAGAGRGAGLRCKX
g_271	original_DE	euk	n.d.	-13.2	g_271
g_271	qseq	n.d.	n.d.	n.d.	MNSSPEVAERGVSPTLIGCRVGRGAGLAVLTSFPAEEGPLPRAVPSFLPPPSWVACTHLGEQRGGPGGGLPEYWGRNRRVGGNLEGAGQRRESDAVCGDGGGERGGKEGAVGAGAEAPGPRDGAGRRVPGSRWRHDRPWGSWERGQRRGLLGPPRSPCRLSPHRKGLSQSALPYRRSVPTWLKLTSDDVKEQIYKLAKKGLTPSQIGVILRDSHGVAQVRFVTGNKILRILKSKGLAPDLPEDLYHLIKKAVAVRKHLERNRKVSANLKWELHLAFTNNTVASLX
g_271	DE	0.590474	0.102139	0.694444	Small ribosomal subunit protein uS15
g_271	MF_ARGOT	10.1692	0.76773	70181	small ribosomal subunit rRNA binding
g_271	CC_ARGOT	8.14127	0.718998	22627	cytosolic small ribosomal subunit
g_271	BP_ARGOT	3.28779	0.567981	6412	translation
g_271	CC_ARGOT	7.05713	0.690428	5730	nucleolus
g_271	MF_ARGOT	3.81145	0.588173	3735	structural constituent of ribosome
g_272	original_DE	euk	n.d.	-13.2	g_272
g_272	qseq	n.d.	n.d.	n.d.	MAAAVRRDALPEHWSYGVCRDGRVFFIDDLTRSTTWLHPRTGEPVNSGHMIRSDLPRGWEEGFSEEGASYFIEX
g_273	original_DE	bac	n.d.	-13.2	g_273
g_273	qseq	n.d.	n.d.	n.d.	MGKVGRGVCGGSCSAAGNRFPPGGCLVGGALLVSAVWALRVWARGGRRQPGLRAPLLREAATRGSAPCERQLSAWCGGSGARLCAX
g_274	original_DE	bac	n.d.	-13.2	g_274
g_274	qseq	n.d.	n.d.	n.d.	MGGICGIGNKLRCLLGGCQSRAAAGGGRSLPPPARHRAASGNAVRGFTSSRKRRAALALLKQLRVDGFVVRDVTRVLALRNFTTEEAVX
g_275	original_DE	euk	n.d.	-13.2	g_275
g_275	qseq	n.d.	n.d.	n.d.	MSSARESQAHHGLKRAASPDGSGSWQAADLGNEERKQKFLRLMGAGKKEHTGRLVIGDHRSTSHFRTGQSIQQLVPSRKANTWTGTSQNFQLSRCCREGFQVLRLKLETDEAVELEELLASHX
g_275	DE	1.6173	0.742521	0.516129	Small acidic protein (Fragment)
g_275	GN	n.d.	n.d.	n.d.	SMAP
g_276	original_DE	euk	n.d.	-13.2	g_276
g_276	qseq	n.d.	n.d.	n.d.	MSTRCLRGGAAVWCKDFGARREFAFLLRALPEAPSQAHSHDAEAQVPLSREPSLTPWERFAAGGQPRTRRRGLSERPHLSSNHHYSNKRGSRREPPQVRHARVAAQQPPRALPNGPPRAPPNGPPRAPPPRAPPPSRPALFPPEAALSSRLPGCQSACGHGPSSARISGSGSPRLPERRRRASGENYRSRRPPRSATGPX
g_277	original_DE	bac	n.d.	-13.2	g_277
g_277	qseq	n.d.	n.d.	n.d.	MTRAAGVGLREPEGGEAEGARSPQTAPRSAQRKARTGCHSAGAGHRRDAPAFPGGVRRAGERIPAGRAAAAALPEPRDRAAGPGRRRAALLPLLPLTVRSRLGGKLENTLASPLTRALFTCLKRHREAGAYKAARAAACQGALGLALRKAKQTAVAAARKSSKNPLPAGVGPGNSAVGAPPGPPHAYGHAGEGKKGGIEDLEMENTTRRKKPSVFPARLPVGGKERPHAILGQREAAPAVPGRPAAPQLPRGSGPRCRCRCPSRPVPVLGHTQAVPVARAFPEVX
g_278	original_DE	bac	n.d.	-13.2	g_278
g_278	qseq	n.d.	n.d.	n.d.	MERRRREFSGAFRFSFKFEVGERFEVGHNRAPSPERGAIQSCGSCGRQCRPRPRRGTVPGLCGSQRRLISASRGLGX
g_279	original_DE	bac	n.d.	-13.2	g_279
g_279	qseq	n.d.	n.d.	n.d.	MRAALWQRPAREFSLPQLFAGVFDNCSIHDPERSHQWELMREPPRLALLRGGAGTALPPSRTGNACTRVAAPGRPCGSAALRPLPGPPPRSCGRGEGEAEGRSPAPVALRGLAECLLPPAGALGGGPGGPCSGATRKGRQWQRPPGGRGGCGRGLRPMVYAFSVPGFQCLASSLLAX
g_280	original_DE	euk	n.d.	-13.2	g_280
g_280	qseq	n.d.	n.d.	n.d.	MAAPRQKAAARNNEETQTGVPCSQKRKVAAKKTVETQTEALHMHGRKAAAKKNEETQIEIPNQDAGVQVSGCSECQSLALAALGEGGSDCVRCDQVNYLLSLVVDLKEEVERLRSIRDCEREIDCWYKTLSAPRSWQPDEALHGECHPLPPCKQVTVGNQHADGIPAIVNPLSSPPPRINGEESGDVGQWRKAPAQQHRRALPVSPQPLQLPLRNRYSALQGQLDNGGDDGSPQLEVLPKSNQSSPSIRTSSTKKKRQVIVIGWX
g_281	original_DE	euk	n.d.	-13.2	g_281
g_281	qseq	n.d.	n.d.	n.d.	MFQVIQHISFLARSSSPDVSTRCRDSKAGSAATHGAYRRCGSQLRCRAKRRPSDAAEPRCRALPAGCPLYLPPRQPAWAPEGPRQPIASPAVRPGGDVMPRSEPPSHSQKTRQRRGGGKEAERSATHGSPTPRRGARSGRPLPQSGAALSAPRRLTFGREGLRPRSRGAHSAEQCLRDCAGRSEEPRAAESSIPRRLPRARSTVGSRSPRGNRHRHLCHRYHRHGQVQRLPARGRVAGGSRDPQAVADYRQLPQPHASPRRTLCTCRQDVCTGGGVFAEGSRGPERSGKLPPARAGTGSRGNPHPRLRSRRWGGWRRGGNQQLRAPSLRRCRTVLDGRSSAFHLEMHEAGLRATAGLCCRFSALVLQNYDYKTVEDELSPARGSPLRLPPGWARPGALL…
g_282	original_DE	euk	n.d.	-13.2	g_282
g_282	qseq	n.d.	n.d.	n.d.	MREEREAAASVSRRGSGKPPPHRPQPDGAGPPPPPALPESLRNGYVRGCATPLRRDPPESFPSPPLCPSAAASSRRALLSLGALAAVALSLLAFPGRGSAGPQDGGGWRSPRTLHALLSLSRCLSPLFSIACAFFFLTCRLARGERGATRWWLLALPVCCYSGDLVALRWLPPAQGRGEEPLAPGEPRLAAGRLLAALGSVAALTLLQSSAGLRRSLLVLLFSGAVWLVSLTGLQPLPPALRPLLAGSVGVAGCLLALCGAERGNFAERGRAAPQQHHPQPRLPGAEDKVPAIRPRRRSSCVSLGEASGSYYGSSKMFRRPSLPCISREQVGGSGTAGRNFVSGELCSLFQLLEVCVRGVCCHTLINRGKHSLISVCX
g_283	original_DE	bac	n.d.	-13.2	g_283
g_283	qseq	n.d.	n.d.	n.d.	MEHLHAQATFLRCLKVNKQRREGKPTRSEPSSRFRTARPPAPSHAAPGRRAALSQPVKPRGDPQPRRHRTAALRTARAGSRYPPARPVTSRQTDAAARVRGGHARAASPPNPASPSLPASRAAVTAWQFARSRSRGACRRRGFRARRVQRVKGGGRGPFPTALPPPPTAAPPVSAGRRQRAPPAGSVRGRASRAARLLPFLFFFFPSLPTMLRTPPPAGQKPRLGPAPLSX
g_284	original_DE	bac	n.d.	-13.2	g_284
g_284	qseq	n.d.	n.d.	n.d.	MCRCPWRNTQHQTARKGQALAASRTPPPVGPGPRAGATTGPGGAVGTPAAGSARPGSAKCLLTAPLLPFFPSSLLTLLPPLPTVRPTLRGRGAAGPPCRSPCFLPAAIRAEGQRGGRAPAALALACSGQTAAAAARDIERARPGDRRMRSRARPLPAVLSSLRX
g_285	original_DE	bac	n.d.	-13.2	g_285
g_285	qseq	n.d.	n.d.	n.d.	MRPELKQQRSALPAAASRSPSDQLPHSREPSGTILSRGTQLISVRTASSRPTELSVSPMPHSAAAAGPRPGGGRRRPHYAPPLPFPAPGPPGLQRGRGVPHGVWRRGAAHRDAAVLRAAARSGRTRWVGAGPAELCLRRFAPAPAMADVEPLPPGHLGATAAAMGHASSVQNNAKEAEPPTPLPRGRQGRSEGAPRGRRHVSGRGGPSGSGVTAPPNVARAVPVWX
g_286	original_DE	bac	n.d.	-13.2	g_286
g_286	qseq	n.d.	n.d.	n.d.	MAAGGRGRLISHANERKYIHEGAWPRPPADSSRSSKAVLPPLRARLRAAFGLAAARPAVPRSSKPRVRELPSPLRHHPGVTAASELSAQRDISALLRPKFVPTKNPKLSAX
g_287	original_DE	euk	n.d.	-13.2	g_287
g_287	qseq	n.d.	n.d.	n.d.	MAAGCRDGPGQEKYRLVVVGGGGVGKSALTIQFIQVRRGTGAAPLAAPGRFRSARPRRRGLGAARRAEPGGRKARRRPVLPAGGGGVTLGAPREGATGGKGRPPPLAWRCPRRAGGAAPGCEARPCGRREAAGQDRASRAARLPRYWSAAYEKLRGX
g_288	original_DE	bac	n.d.	-13.2	g_288
g_288	qseq	n.d.	n.d.	n.d.	MVLLLPTPSISGWLRHAQHPRPPAGTKQGSALLGGRQAGCSRPCAVGPKFSACFALGCACTEQTTAAQRRDAGGDGGLPEIPSHDALGRLQAGGPQTEQFLNKIMTPSTANSWX
g_289	original_DE	bac	n.d.	-13.2	g_289
g_289	qseq	n.d.	n.d.	n.d.	MAKYCSWCLLSIVLSSAASWFSGHGLTEGLLSLPFRGTEGASPNSGAVPIRAQPAAERGVESSREEPGPCTWFPPQQPRSARDCQPSDRGSSAILGRGAGLAGAAGRARPRGAKPRPGSARPINSRVPHAAAPHMPSVGAGACRESVAARLTGQGRARRGGRPGLPAARLARAMPQRGGSGEAGGX
g_290	original_DE	euk	n.d.	-13.2	g_290
g_290	qseq	n.d.	n.d.	n.d.	MRAERVLLPPGPAPADARGSRAAAAAAPVAYGNDGANGGRPPGAAMAIPPLATAAPSDGRPRLARPRRLFGSWQRRGPAASERARRRRRRGAARPRRAAVSPGSGPELGGAGPAPSSEAGPGPPSLARLPRSGCPAGPPRPRGLPLPDGLAAAAARVRARRGAGSILRPRRGRTGAAYPGGGRGNIPPGRAPRGGPGCMGRGQPGAAGGGSRPFLPARSAGX
g_291	original_DE	bac	n.d.	-13.2	g_291
g_291	qseq	n.d.	n.d.	n.d.	MGTNSAFGIARVPQAAEHLPTRSAAGSAEPACPAAVGLGAARLRLSAAGGGLLPSGGAGAASGAAPGSCLPPRDKKVRGRRKEMQSTRQETTATLRHVEGAMATRQPLGSRYGPLGGRWALRRRERRARASGEKLRGARPWGWAARSRPSCAX
g_292	original_DE	euk	n.d.	-13.2	g_292
g_292	qseq	n.d.	n.d.	n.d.	MLSVQPKGKQKGCAGCNRKIKDRYLLKALDKYWHEDCLKCACCDCRLGEVGSTLYTKANLILCRRDYLRLFGTTGNCAACSKLIPAFEMVMRARDNVYHLDCFACQLCNQRFCVGDKFFLKNNMILCQMDYEEGQLNGSFESQVQX
g_292	DE	1.11765	0.558185	0.545455	Rhombotin-1
g_292	GN	n.d.	n.d.	n.d.	LMO1
g_292	MF_ARGOT	11.0356	0.787053	140297	DNA-binding transcription factor binding
g_292	BP_ARGOT	7.82605	0.710898	45944	positive regulation of transcription by RNA polymerase II
g_292	CC_ARGOT	3.43807	0.573931	5634	nucleus
g_292	MF_ARGOT	9.97559	0.763302	3713	transcription coactivator activity
g_292	MF_ARGOT	2.42528	0.530824	46872	metal ion binding
g_292	BP_ARGOT	0.619803	0.419012	46013	regulation of T cell homeostatic proliferation
g_292	BP_ARGOT	0.275926	0.380972	122	negative regulation of transcription by RNA polymerase II
g_293	original_DE	euk	n.d.	-13.2	g_293
g_293	qseq	n.d.	n.d.	n.d.	MTRVGTQFPAASRRRSPTYRRPAPAPSSRGCARAARTSGAGEAVLGGKALCGYDCGLRPARSPERSGEGRRPPPAAGCGAAAPPAGRTARLGPARRLPGSGPRGRRSCWRSAGHGLAGERAEAVAITVNVSARPSRVRPTCQRSHRRPNAKQQVRTLRLAAPAHTAAVTPTALAQRRGQELRCHQPHRLAARNYPGRPPRPSLPFLFTFRPGRLDERVLRRSAGPGKFAPSSAPRTRSAAAPRPPERRSARVLGGLRGAAAAALAAGRCGAAAPEALETRGRSPVAGGSTADGLAPPWGRGSTSKAERRTGEGEIRGRTAHGAAPARRPVLTFAELEPRARRTAASRPGGDSPGPPPPRPAGPGRASAGKPTAVAGGWRPPWALPEDAGRPAPSRLSPR…
g_294	original_DE	bac	n.d.	-13.2	g_294
g_294	qseq	n.d.	n.d.	n.d.	MAWMLDGGPAAATGWDEPGRAEPPCCGQQVAAPPRPAPTASLRAPSPARCAWLFAKRCVRLSAASCAQVRRHCPSAAYGX
g_295	original_DE	euk	n.d.	-13.2	g_295
g_295	qseq	n.d.	n.d.	n.d.	MTEIQGSRKEFTRRPNESLVTWLLRCWDSGASGLFLDGNEARQLGGIARDPAIDRGISRCLDGAATLWERMLVAVREKLPFKDNLKPVMKKWDTIEKGIQYLREIAVVEMLYNPNFTPNDPREDHDPEGVRTTPDIWQKLTKTAPERYATTLAATFQRYEEQDRRPRVFELILTLQNFEQQLPPTHASIAAISEVTNRLNEVEELLFNRDDPVVVSETTNEDRSPNGPPGVMKELIKLVQLIKGDESSSSPVSSKISAIKRRRFPAQARNYSKTTTRVALWRYLRDHGEDMRKWHDQPTPVLRARRGPALSQGRERDNRVYWTVWIRWPGTSEPQKYKALVDTGAQCTLMPSSHEGTESIHISGVTGGSQELTVLEAEISLTGKDWQKHPIVTGPGAPC…
g_295	DE	0.939682	0.479326	0.785714	ribonuclease H
g_295	MF_ARGOT	9.21753	0.745533	4523	RNA-DNA hybrid ribonuclease activity
g_295	EC_ARGOT	9.21753	0.745533	EC:3.1.26.4	GO:0004523
g_295	BP_ARGOT	5.70479	0.651506	15074	DNA integration
g_295	BP_ARGOT	0.709087	0.426969	6278	RNA-templated DNA biosynthetic process
g_295	BP_ARGOT	0.593324	0.416544	6310	DNA recombination
g_295	MF_ARGOT	2.47638	0.533194	46872	metal ion binding
g_295	BP_ARGOT	0.405691	0.397183	6508	proteolysis
g_295	MF_ARGOT	2.16539	0.518366	3676	nucleic acid binding
g_295	MF_ARGOT	0.74535	0.430056	3964	RNA-directed DNA polymerase activity
g_295	EC_ARGOT	0.74535	0.430056	EC:2.7.7.49	GO:0003964
g_295	MF_ARGOT	0.737387	0.429385	4190	aspartic-type endopeptidase activity
g_295	EC_ARGOT	0.737387	0.429385	EC:3.4.23.- EC:3.4.23.1 EC:3.4.23.15 EC:3.4.23.20 EC:3.4.23.25 EC:3.4.23.32 EC:3.4.23.34 EC:3.4.23.35 EC:3.4.23.36 EC:3.4.23.4 EC:3.4.23.43 EC:3.4.23.49 EC:3.4.23.5	GO:0004190
g_296	original_DE	euk	n.d.	-13.2	g_296
g_296	qseq	n.d.	n.d.	n.d.	MGGEVGLLGPPAGGPGPQWRLSVRPPGGWGPLVPITAVLLTAALAPSQPSRLRKTRKLRGHVSHGHGRIGKHRKHPGGRGNAGGMHHHRINFDKYHPGYFGKVGMRHYHLKRNQKFCPTVNLDKLWTLVTEQTRLNYAKNQAGLAPVIDVVRSGYYKVLGKGKLPKQPVIVKAKFFSRRAEEKIKEVGGACVLVAX
g_296	DE	0.910748	0.465851	0.694444	Large ribosomal subunit protein uL15
g_296	GN	n.d.	n.d.	n.d.	RPL27A
g_296	CC_ARGOT	7.23067	0.695141	22625	cytosolic large ribosomal subunit
g_296	MF_ARGOT	3.82846	0.588805	3735	structural constituent of ribosome
g_296	BP_ARGOT	3.30247	0.568568	6412	translation
g_296	CC_ARGOT	0.194549	0.368744	5783	endoplasmic reticulum
g_297	original_DE	euk	n.d.	-13.2	g_297
g_297	qseq	n.d.	n.d.	n.d.	MKTSSLLSTLSSCSHAVVALLYPFSWQHTFIPVLPSSMIDIVCCPTPFLVGLLSSSLPKLKELPVEEALMVNLGSDRFIRQMDDEDTLLPRKLQAALEQALERKNELINQDSDSDSDDECNTLNGLVSEVFIRFFVETVGHYSLFLTQNEKGERVFQREAFRKSVASKSIRRFLEVFMESQMFAGFIQDRELRKCRAKGLFEQRVEQYLEELPDTEQSGVNKFLRGLGNKMKFLHKKNX
g_297	DE	1.17715	0.583002	0.64	DENN domain containing 2B
g_297	GN	n.d.	n.d.	n.d.	DENND2B
g_297	BP_ARGOT	11.8118	0.803727	70374	positive regulation of ERK1 and ERK2 cascade
g_297	MF_ARGOT	8.55704	0.729445	5085	guanyl-nucleotide exchange factor activity
g_297	CC_ARGOT	0.0355847	0.33209	16020	membrane
g_298	original_DE	euk	n.d.	-13.2	g_298
[truncated: 153,706 more rows]

## Sheet: Table S2
Table S2: Functional annotation of predicted proteins using eggNOGMapper
Query Protein ID (query_name)	Seed Ortholog (seed_eggNOG_ortholog)	Ortholog E-value (seed_ortholog_evalue)	Ortholog Score (seed_ortholog_score)	Predicted Gene Name	GO terms	KEGG Ortholog	BiGG Reactions	Annotation taxonomic scope	Matching Orthologous Groups (OG)	Best OG|evalue|score	COG functional categories	Functional Description (eggNOG_HMM_model_annotation)
g_6	9031.ENSGALP00000002898	0	1380.1	LINGO2				aveNOG[1]	04K5P@aveNOG,09VCD@biNOG,0DGKV@chorNOG,0V6BI@meNOG,12U4H@opiNOG,1CRAP@veNOG,COG4886@NOG,KOG0619@euNOG	04K5P|0.0|1450.1	T	leucine rich repeat and Ig domain containing 2
g_10	13735.ENSPSIP00000001037	6.8e-110	357.8					aveNOG[1]	0A7Y3@biNOG,0DUNI@chorNOG,0VIT8@meNOG,12PBX@opiNOG,1D3XX@veNOG,COG2801@NOG,KOG0017@euNOG	0DUNI|2.6e-123|416.4	L	Inherit from opiNOG: to reverse transcriptase
g_14	9031.ENSGALP00000028151	5.9e-99	321					aveNOG[1]	0A6MT@biNOG,0DTX3@chorNOG,0IYF1@euNOG,0VI4S@meNOG,117ET@NOG,13RWK@opiNOG,1D397@veNOG	0IYF1|1.3e-52|182.4	S	tumor suppressor candidate 1
g_15	9031.ENSGALP00000000244	2.7e-90	298.3					aveNOG[1]	04QEM@aveNOG,09W14@biNOG,0E4AC@chorNOG,0V6ZF@meNOG,0XQE8@NOG,13MGM@opiNOG,1DBAM@veNOG,KOG2032@euNOG	KOG2032|6.5e-72|246.8	O	HEAT repeat
g_17	9031.ENSGALP00000000244	4.2e-91	301.1					aveNOG[1]	04QEM@aveNOG,09W14@biNOG,0E4AC@chorNOG,0V6ZF@meNOG,0XQE8@NOG,13MGM@opiNOG,1DBAM@veNOG,KOG2032@euNOG	KOG2032|3.2e-69|237.9	O	HEAT repeat
g_19	13735.ENSPSIP00000001037	1.8e-106	346.9					aveNOG[1]	0A7Y3@biNOG,0DUNI@chorNOG,0VIT8@meNOG,12PBX@opiNOG,1D3XX@veNOG,COG2801@NOG,KOG0017@euNOG	0DUNI|4.6e-123|415.6	L	Inherit from opiNOG: to reverse transcriptase
g_20	9103.ENSMGAP00000001120	2.2e-21	62.8		GO:0003007,GO:0003205,GO:0003206,GO:0003209,GO:0003228,GO:0003230,GO:0007275,GO:0007507,GO:0007512,GO:0007517,GO:0008150,GO:0009653,GO:0009790,GO:0009792,GO:0009887,GO:0009888,GO:0014706,GO:0032501,GO:0032502,GO:0044699,GO:0044707,GO:0044767,GO:0048513,GO:0048644,GO:0048729,GO:0048731,GO:0048738,GO:0048856,GO:0055008,GO:0055009,GO:0060415,GO:0060537,GO:0061061,GO:0072358,GO:0072359			aveNOG[1]	04FV8@aveNOG,09T3R@biNOG,0DEEU@chorNOG,0V42H@meNOG,12P08@opiNOG,1CP4J@veNOG,COG5022@NOG,KOG0161@euNOG	04FV8|1.1e-17|66.4	Z	Myosin tail
g_21	13735.ENSPSIP00000001037	5.5e-22	68.4					aveNOG[1]	0A7Y3@biNOG,0DUNI@chorNOG,0VIT8@meNOG,12PBX@opiNOG,1D3XX@veNOG,COG2801@NOG,KOG0017@euNOG	0DUNI|1.2e-21|80.7	L	Inherit from opiNOG: to reverse transcriptase
g_22	13616.ENSMODP00000038871	4e-21	67.5					aveNOG[1]	0A5PR@biNOG,0DS2U@chorNOG,0UXP4@maNOG,0VGZT@meNOG,13NMG@opiNOG,1D2KS@veNOG,COG2801@NOG,KOG0017@euNOG	0VGZT|2.3e-25|92.4	L	Inherit from KOG: Retrotransposon protein
g_23	5850.PKH_010920	2e-207	684.3					aveNOG[1]	00A6T@acoNOG,01MZD@apiNOG,0RDZ1@haeNOG,COG0464@NOG,KOG0730@euNOG,KOG0733@euNOG	KOG0733|9.4e-210|702.7	O	Ribosome biogenesis ATPase
g_27	13735.ENSPSIP00000001037	6.8e-26	80.8					aveNOG[1]	0A7Y3@biNOG,0DUNI@chorNOG,0VIT8@meNOG,12PBX@opiNOG,1D3XX@veNOG,COG2801@NOG,KOG0017@euNOG	0DUNI|4.4e-24|88.7	L	Inherit from opiNOG: to reverse transcriptase
g_28	31033.ENSTRUP00000004791	3.4e-66	215.2					aveNOG[1]	0A5PR@biNOG,0DS2U@chorNOG,0NAFD@fiNOG,0VGZT@meNOG,13NMG@opiNOG,1D2KS@veNOG,COG2801@NOG,KOG0017@euNOG	0VGZT|2.8e-137|463.1	L	Inherit from KOG: Retrotransposon protein
g_29	13735.ENSPSIP00000001037	4.7e-110	358.4					aveNOG[1]	0A7Y3@biNOG,0DUNI@chorNOG,0VIT8@meNOG,12PBX@opiNOG,1D3XX@veNOG,COG2801@NOG,KOG0017@euNOG	0DUNI|2.7e-121|409.7	L	Inherit from opiNOG: to reverse transcriptase
g_31	13735.ENSPSIP00000001037	5.4e-23	71.2					aveNOG[1]	0A7Y3@biNOG,0DUNI@chorNOG,0VIT8@meNOG,12PBX@opiNOG,1D3XX@veNOG,COG2801@NOG,KOG0017@euNOG	0DUNI|1.4e-21|80.5	L	Inherit from opiNOG: to reverse transcriptase
g_32	13735.ENSPSIP00000001037	3.9e-102	332.3					aveNOG[1]	0A7Y3@biNOG,0DUNI@chorNOG,0VIT8@meNOG,12PBX@opiNOG,1D3XX@veNOG,COG2801@NOG,KOG0017@euNOG	0DUNI|5.7e-111|375.6	L	Inherit from opiNOG: to reverse transcriptase
g_34	9031.ENSGALP00000000631	2.5e-160	526.4	DDX25				aveNOG[1]	04P1P@aveNOG,09T8N@biNOG,0DFBE@chorNOG,0V50J@meNOG,0XRGX@NOG,12PB6@opiNOG,1CQ16@veNOG,KOG0332@euNOG	KOG0332|2.6e-121|409.7	A	ATPdependent RNA helicase
g_35	13735.ENSPSIP00000017275	4.6e-99	324.9					aveNOG[1]	0A0T7@biNOG,0DNEE@chorNOG,0IVHB@euNOG,0VBPT@meNOG,0YZ5M@NOG,13MJ4@opiNOG,1CXBS@veNOG	0IVHB|3.5e-58|201.7	S	outer dense fiber of sperm tails
g_41	9031.ENSGALP00000029365	6.9e-124	402.4					aveNOG[1]	04JBN@aveNOG,09Z4T@biNOG,0DM01@chorNOG,0IV8J@euNOG,0VAED@meNOG,11H6J@NOG,12TTZ@opiNOG,1CVUV@veNOG	0IV8J|4.1e-106|358.5	S	tumor protein p53 inducible protein 11
g_47	9031.ENSGALP00000013005	8e-92	295.5	ALX4	GO:0005575,GO:0005622,GO:0005623,GO:0005634,GO:0043226,GO:0043227,GO:0043229,GO:0043231,GO:0044424,GO:0044464	K09451		aveNOG[1]	04K7G@aveNOG,09WS7@biNOG,0DI1V@chorNOG,0V7QH@meNOG,0YIJ3@NOG,13K6B@opiNOG,1CSSH@veNOG,KOG0490@euNOG	04K7G|2.3e-84|287.6	K	OAR domain
g_48	9031.ENSGALP00000013005	2.9e-176	570.9	ALX4	GO:0005575,GO:0005622,GO:0005623,GO:0005634,GO:0043226,GO:0043227,GO:0043229,GO:0043231,GO:0044424,GO:0044464	K09451		aveNOG[1]	04K7G@aveNOG,09WS7@biNOG,0DI1V@chorNOG,0V7QH@meNOG,0YIJ3@NOG,13K6B@opiNOG,1CSSH@veNOG,KOG0490@euNOG	04K7G|8.4e-180|601.8	K	OAR domain
g_49	7897.ENSLACP00000019772	1.2e-292	967.6					aveNOG[1]	0A3ME@biNOG,0DNC2@chorNOG,0V92T@meNOG,12WTK@opiNOG,1CXW0@veNOG,COG0436@NOG,KOG0256@euNOG	KOG0256|2.5e-114|387.6	E	1-aminocyclopropane-1-carboxylate synthase
g_51	9483.ENSCJAP00000020911	1.7e-68	218.3					aveNOG[1]	0A4RW@biNOG,0DSIG@chorNOG,0IYI1@euNOG,0UUVF@maNOG,0VGN6@meNOG,12BAS@NOG,13SII@opiNOG,16I0F@prNOG,1B1AE@spriNOG,1D2CS@veNOG	0IYI1|3.8e-86|294.5	S	chromosome 11 open reading frame 96
g_52	9031.ENSGALP00000012951	2.4e-92	298.3	ALKBH3		K10860		aveNOG[1]	04MUW@aveNOG,09TCJ@biNOG,0DRIP@chorNOG,0IETS@euNOG,0VETZ@meNOG,13I5X@opiNOG,1D0RJ@veNOG,COG3145@NOG	0IETS|8.1e-81|275.7	L	alkB, alkylation repair homolog 3 (E. coli)
g_60	9031.ENSGALP00000012909	2.4e-33	102.8	TTC17				aveNOG[1]	04KTK@aveNOG,09X9A@biNOG,0DPDF@chorNOG,0VAIE@meNOG,0XSDX@NOG,12S4M@opiNOG,1CYBB@veNOG,KOG4507@euNOG	04KTK|2.9e-25|92.2	S	tetratricopeptide repeat domain 17
g_67	9103.ENSMGAP00000010789	5.4e-67	210.8	TRAF6	GO:0000187,GO:0001932,GO:0001934,GO:0002218,GO:0002221,GO:0002224,GO:0002253,GO:0002376,GO:0002682,GO:0002684,GO:0002755,GO:0002757,GO:0002758,GO:0002764,GO:0006950,GO:0006952,GO:0006955,GO:0007154,GO:0007165,GO:0007250,GO:0008150,GO:0009893,GO:0009966,GO:0009967,GO:0009987,GO:0010562,GO:0010604,GO:0010627,GO:0010646,GO:0010647,GO:0010740,GO:0019220,GO:0019222,GO:0023051,GO:0023052,GO:0023056,GO:…	K03175		aveNOG[1]	04QZ7@aveNOG,0B5NN@biNOG,0E90Y@chorNOG,0ISDW@euNOG,0WIAQ@meNOG,0XTXK@NOG,13F00@opiNOG,1DFX4@veNOG	04QZ7|4e-61|211.1	T	TNF receptor-associated factor 6
g_68	9031.ENSGALP00000012846	2.4e-64	204.9	PRR5L				aveNOG[1]	04NG1@aveNOG,0A4FX@biNOG,0DRYW@chorNOG,0IJB2@euNOG,0VFAS@meNOG,0ZWNQ@NOG,13HIX@opiNOG,1D17S@veNOG	0IJB2|9.2e-38|133.9	S	Proline rich 5 like
g_69	13735.ENSPSIP00000001037	3.8e-78	252.9					aveNOG[1]	0A7Y3@biNOG,0DUNI@chorNOG,0VIT8@meNOG,12PBX@opiNOG,1D3XX@veNOG,COG2801@NOG,KOG0017@euNOG	0DUNI|2e-91|311.1	L	Inherit from opiNOG: to reverse transcriptase
g_71	9031.ENSGALP00000012814	7.9e-100	324.7	COMMD9				aveNOG[1]	04M2F@aveNOG,0A2M7@biNOG,0DQ8V@chorNOG,0II5T@euNOG,0VDH8@meNOG,11H94@NOG,13212@opiNOG,1CZAM@veNOG	0II5T|8.6e-67|228.5	S	COMM domain containing 9
g_72	9315.ENSMEUP00000009551	1.7e-89	286.9					aveNOG[1]	0AQW2@biNOG,0E445@chorNOG,0JCXY@euNOG,0V29E@maNOG,0W3FC@meNOG,11AQY@NOG,14WBN@opiNOG,1DE85@veNOG	0JCXY|1.8e-100|338.3	T	NA
g_75	9593.ENSGGOP00000027352	2.9e-144	472.5					aveNOG[1]	0A1TA@biNOG,0DPFG@chorNOG,0IHNI@euNOG,0RS7W@homNOG,0UQMW@maNOG,0VCP2@meNOG,0XSE2@NOG,12U1K@opiNOG,166VG@prNOG,1ATYK@spriNOG,1CYDP@veNOG	0IHNI|3.2e-133|449.6	S	four jointed box 1 (Drosophila)
g_77	9103.ENSMGAP00000010759	2.6e-92	297.7	PAMR1				aveNOG[1]	04HW8@aveNOG,09WYA@biNOG,0DI8U@chorNOG,0V7WG@meNOG,12TBP@opiNOG,1CSZA@veNOG,COG5640@NOG,KOG3627@euNOG	04HW8|3.7e-86|293.8	O	peptidase domain containing associated with muscle regeneration 1
g_78	9103.ENSMGAP00000010759	9.8e-258	841.1	PAMR1				aveNOG[1]	04HW8@aveNOG,09WYA@biNOG,0DI8U@chorNOG,0V7WG@meNOG,12TBP@opiNOG,1CSZA@veNOG,COG5640@NOG,KOG3627@euNOG	04HW8|1.1e-255|854.2	O	peptidase domain containing associated with muscle regeneration 1
g_80	13735.ENSPSIP00000001037	5.6e-111	361.4					aveNOG[1]	0A7Y3@biNOG,0DUNI@chorNOG,0VIT8@meNOG,12PBX@opiNOG,1D3XX@veNOG,COG2801@NOG,KOG0017@euNOG	0DUNI|4.6e-123|415.6	L	Inherit from opiNOG: to reverse transcriptase
g_81	43179.ENSSTOP00000023350	1.2e-19	60.2					aveNOG[1]	0A4X8@biNOG,0DSCA@chorNOG,0IYBN@euNOG,0UUQ9@maNOG,0VDRE@meNOG,0Z2X0@NOG,13SG6@opiNOG,195DR@roNOG,1B8K9@spriNOG,1D0YP@veNOG	0IYBN|1.9e-22|83.1	S	NA
g_84	99883.ENSTNIP00000013362	7.5e-146	474.7					aveNOG[1]	0A9J1@biNOG,0DZ3Q@chorNOG,0J0J0@euNOG,0VKGG@meNOG,11UNX@NOG,13UQ3@opiNOG,1D7QX@veNOG	0J0J0|5.8e-125|420.3	S	BTB POZ domain containing
g_85	59729.ENSTGUP00000005869	0	1148.3	ABTB2		K10521		aveNOG[1]	04ERZ@aveNOG,09XIB@biNOG,0DIVS@chorNOG,0IESM@euNOG,0V8GG@meNOG,0XRDX@NOG,12X6N@opiNOG,1CYQE@veNOG	0IESM|0.0|1013.3	S	BTB POZ domain containing
g_86	9031.ENSGALP00000000126	3.2e-151	494.9					aveNOG[1]	09XT9@biNOG,0DQW4@chorNOG,0V80K@meNOG,12Q9F@opiNOG,1CX4G@veNOG,COG1444@NOG,KOG2036@euNOG	KOG2036|4.6e-128|432.8	G	N-acetyltransferase 10
g_88	9031.ENSGALP00000022897	1.7e-33	109.7	CAPRIN1		K18743		aveNOG[1]	04GUR@aveNOG,09V3H@biNOG,0DJN2@chorNOG,0IEA8@euNOG,0V8Z6@meNOG,10M5Q@NOG,12UCT@opiNOG,1CUEY@veNOG	0IEA8|8.2e-08|35.8	S	Cell cycle associated protein 1
g_91	9685.ENSFCAP00000017470	4.9e-106	339.8					aveNOG[1]	0A2EN@biNOG,0CF8E@carNOG,0DQ1R@chorNOG,0UGS3@maNOG,0VDAA@meNOG,0YIJ3@NOG,12YFI@opiNOG,1CZ2G@veNOG,KOG0490@euNOG	0CF8E|2.5e-106|356.9	T	LIM domain only 2
g_97	9031.ENSGALP00000012500	2.1e-286	936.3	SHANK2				aveNOG[1]	04FIV@aveNOG,09WS1@biNOG,0DIRV@chorNOG,0V7QD@meNOG,12Q3C@opiNOG,1CTGZ@veNOG,COG0666@NOG,KOG0504@euNOG,KOG4375@euNOG	04FIV|9.7e-296|988.3	T	SH3 and multiple ankyrin repeat domains 2
g_100	9103.ENSMGAP00000010339	3.8e-104	337.5	FADD		K02373		aveNOG[1]	04PUQ@aveNOG,0A6NJ@biNOG,0DTN8@chorNOG,0J0KM@euNOG,0VHGP@meNOG,122TX@NOG,13U9H@opiNOG,1D2ZV@veNOG	0J0KM|2.1e-63|218.6	T	Fas (tnfrsf6)-associated via death domain
g_101	9103.ENSMGAP00000010336	8.7e-181	594.3	ANO1				aveNOG[1]	04G5T@aveNOG,09WBZ@biNOG,0DJW1@chorNOG,0V7AE@meNOG,0XS4S@NOG,12SW7@opiNOG,1CUPC@veNOG,KOG2514@euNOG	KOG2514|8.1e-46|160.2	U	Anoctamin
g_103	9031.ENSGALP00000037907	1.3e-149	491.6	FGF3	GO:0005575,GO:0005576	K04358		aveNOG[1]	04J3T@aveNOG,0A1ZQ@biNOG,0DI6I@chorNOG,0VCUX@meNOG,11IPH@NOG,12X9F@opiNOG,1CSWW@veNOG,KOG3885@euNOG	KOG3885|9.1e-64|219.4	T	fibroblast growth factor
g_104	9031.ENSGALP00000037909	1.7e-112	369.9					aveNOG[1]	0A2RF@biNOG,0DQDA@chorNOG,0VDM6@meNOG,11IPH@NOG,13BNC@opiNOG,1CZFB@veNOG,KOG3885@euNOG	KOG3885|4.1e-54|187.7	T	fibroblast growth factor
g_107	9031.ENSGALP00000012209	5.6e-152	499.6	FGF19		K04358		aveNOG[1]	04EXJ@aveNOG,09XVE@biNOG,0DJ7W@chorNOG,0V8T1@meNOG,11IPH@NOG,13PHJ@opiNOG,1CTZU@veNOG,KOG3885@euNOG	KOG3885|1.2e-32|117.2	T	fibroblast growth factor
g_109	99883.ENSTNIP00000005961	2e-153	505					aveNOG[1]	09WBY@biNOG,0V7AD@meNOG,0XRKC@NOG,12TGV@opiNOG,KOG0656@euNOG	KOG0656|1.2e-56|196.5	D	(DC) complex that phosphorylates and inhibits members of the retinoblastoma (RB) protein family including RB1 and regulates the cell-cycle during G(1) S transition. Phosphorylation of RB1 allows dissociation of the transcription factor E2F from the RB E2F complex and the subsequent transcription of E2F target genes which are responsible for the progression through the G(1) phase. Hypophosphorylat…
g_113	9305.ENSSHAP00000005368	3.6e-51	162.2					aveNOG[1]	09W7X@biNOG,0DHGZ@chorNOG,0UTK9@maNOG,0V769@meNOG,0XNP6@NOG,12RIM@opiNOG,1CS7B@veNOG,KOG2301@euNOG	09W7X|2.8e-58|202.0	P	two pore segment channel 2
g_114	9031.ENSGALP00000012176	0	1685		GO:0000775,GO:0000785,GO:0000792,GO:0000910,GO:0005575,GO:0005622,GO:0005623,GO:0005634,GO:0005694,GO:0005721,GO:0005819,GO:0005856,GO:0007049,GO:0007059,GO:0008150,GO:0009987,GO:0015630,GO:0022402,GO:0032991,GO:0043226,GO:0043227,GO:0043228,GO:0043229,GO:0043231,GO:0043232,GO:0043234,GO:0044422,GO:0044424,GO:0044427,GO:0044430,GO:0044446,GO:0044464,GO:0044699,GO:0044763,GO:0051301	K11515		aveNOG[1]	04GQU@aveNOG,09WT1@biNOG,0DI30@chorNOG,0V5DH@meNOG,0XRQ9@NOG,134QW@opiNOG,1CSC0@veNOG,KOG4456@euNOG	KOG4456|2.3e-155|523.1	D	inner centromere protein antigens 135 155kDa
g_115	9031.ENSGALP00000012165	7.9e-52	166.3					aveNOG[1]	09WT1@biNOG,0DI30@chorNOG,0V5DH@meNOG,0XRQ9@NOG,134QW@opiNOG,1CSC0@veNOG,KOG4456@euNOG	KOG4456|3.7e-13|52.9	D	inner centromere protein antigens 135 155kDa
g_116	13616.ENSMODP00000025097	4.8e-152	496.5					aveNOG[1]	09VFI@biNOG,0DFG4@chorNOG,0UMQN@maNOG,0V6EQ@meNOG,12SJM@opiNOG,1CQ5V@veNOG,COG4886@NOG,KOG0619@euNOG	0UMQN|3.7e-158|529.4	T	leucine rich repeat containing 55
g_117	9031.ENSGALP00000028674	2.9e-246	808.2					aveNOG[1]	0A0MS@biNOG,0DN97@chorNOG,0VBI1@meNOG,0XRW9@NOG,12T0Q@opiNOG,1CSBT@veNOG,KOG3656@euNOG	0A0MS|3.5e-173|579.8	T	apelin receptor
g_118	9103.ENSMGAP00000010176	0	2629					aveNOG[1]	04PP8@aveNOG,0A3P4@biNOG,0DJEA@chorNOG,0IK8U@euNOG,0VEHY@meNOG,0ZTHW@NOG,13MIQ@opiNOG,1CX6S@veNOG	0IK8U|0.0|1168.1	S	tankyrase 1 binding protein 1, 182kDa
g_119	9103.ENSMGAP00000010142	0	1577.3	SSRP1	GO:0005575,GO:0005622,GO:0005623,GO:0005634,GO:0005694,GO:0005730,GO:0031974,GO:0031981,GO:0043226,GO:0043227,GO:0043228,GO:0043229,GO:0043231,GO:0043232,GO:0043233,GO:0044422,GO:0044424,GO:0044428,GO:0044446,GO:0044464,GO:0070013	K09272		aveNOG[1]	04N64@aveNOG,09Z8K@biNOG,0DKQR@chorNOG,0VA5X@meNOG,12SUZ@opiNOG,1CVJ8@veNOG,COG5165@NOG,COG5648@NOG,KOG0526@euNOG	04N64|0.0|1671.9	B	Histone chaperone Rttp106-like
g_120	9031.ENSGALP00000012112	3.8e-270	889.4					aveNOG[1]	09Y1W@biNOG,0DH9T@chorNOG,0IFJF@euNOG,0V8ZD@meNOG,0XR0C@NOG,12QBX@opiNOG,1CRZS@veNOG	0IFJF|1e-167|562.9	P	purinergic receptor P2X, ligand-gated ion channel
g_121	9031.ENSGALP00000011990	1.9e-77	246.5					aveNOG[1]	0AHRM@biNOG,0E0DG@chorNOG,0VV3J@meNOG,0XPJ1@NOG,14BNT@opiNOG,1D8JW@veNOG,KOG4297@euNOG	0AHRM|3.4e-55|190.1	T, V	Lectin C-type domain
g_122	13735.ENSPSIP00000006912	1.3e-170	557.1					aveNOG[1]	0B14B@biNOG,0E6EV@chorNOG,0JR5V@euNOG,0WDNM@meNOG,1150Y@NOG,14FGX@opiNOG,1DDDH@veNOG	0JR5V|1.4e-184|618.3	P	Solute carrier family 43 member
g_124	10090.ENSMUSP00000057725	1.6e-159	521					aveNOG[1]	09T50@biNOG,0DEG7@chorNOG,0UFE1@maNOG,0V43S@meNOG,131N2@opiNOG,18ZDH@roNOG,1AYIY@spriNOG,1CP5W@veNOG,COG4886@NOG,KOG0619@euNOG	1AYIY|2.4e-167|560.8	T	Reticulon 4 receptor-like 2
g_125	9031.ENSGALP00000007724	1.6e-60	194.1	TIMM10		K17778		aveNOG[1]	04QAZ@aveNOG,0A886@biNOG,0DUUD@chorNOG,0VKB8@meNOG,12539@NOG,13WNP@opiNOG,1D459@veNOG,KOG3480@euNOG	KOG3480|4e-38|135.2	U	mitochondrial import inner membrane, translocase subunit
g_126	9103.ENSMGAP00000009934	1.3e-98	325.3					aveNOG[1]	0A4DD@biNOG,0DRWN@chorNOG,0VF89@meNOG,13H7V@opiNOG,1D15G@veNOG,COG5069@NOG,KOG4678@euNOG	KOG4678|2e-62|215.8	Z	Sperm antigen with calponin homology and coiled-coil domains
g_127	9544.ENSMMUP00000011720	2.9e-42	138					aveNOG[1]	09TT2@biNOG,0DF3E@chorNOG,0UMQG@maNOG,0V4SE@meNOG,12T66@opiNOG,16JJN@prNOG,1B7KW@spriNOG,1CPT7@veNOG,COG5078@NOG,KOG0422@euNOG	KOG0422|4.5e-38|134.3	O	ubiquitin-conjugating enzyme E2L
g_128	9103.ENSMGAP00000009949	2.1e-284	930.4					aveNOG[1]	04KET@aveNOG,09WV9@biNOG,0DI5D@chorNOG,0V7T9@meNOG,13K9G@opiNOG,1CP7E@veNOG,COG4826@NOG,KOG2392@euNOG	04KET|1.7e-287|957.4	V	SERPIN
g_129	9031.ENSGALP00000011912	9.1e-85	277.6					aveNOG[1]	0A6PM@biNOG,0DTP8@chorNOG,0VHHI@meNOG,11VJ1@NOG,13QS0@opiNOG,1D30W@veNOG,KOG3399@euNOG	KOG3399|4.4e-66|228.0	U	Yippee-like
g_130	9031.ENSGALP00000011907	1.1e-295	967	CLP 1	GO:0000214,GO:0000394,GO:0003674,GO:0003824,GO:0005575,GO:0005622,GO:0005623,GO:0005634,GO:0006139,GO:0006388,GO:0006396,GO:0006399,GO:0006725,GO:0006793,GO:0006796,GO:0006807,GO:0008033,GO:0008150,GO:0008152,GO:0008380,GO:0009892,GO:0009987,GO:0010467,GO:0010468,GO:0010605,GO:0010608,GO:0010629,GO:0016043,GO:0016070,GO:0016246,GO:0016301,GO:0016310,GO:0016441,GO:0016458,GO:0016740,GO:0016772,GO:…	K14399		aveNOG[1]	04N2J@aveNOG,09V2G@biNOG,0DGBS@chorNOG,0V5TB@meNOG,12NXU@opiNOG,1CR18@veNOG,COG5623@NOG,KOG2749@euNOG	04N2J|0.0|1021.6	A	cleavage and polyadenylation factor I subunit
g_132	9103.ENSMGAP00000019776	0	1499.1	ZDHHC5		K20030		aveNOG[1]	04KZX@aveNOG,09TIQ@biNOG,0DEVA@chorNOG,0V4HN@meNOG,12QIU@opiNOG,1CPJ1@veNOG,COG5273@NOG,KOG1311@euNOG	04KZX|0.0|1599.7	S	zinc finger, DHHC-type containing 5
g_133	9031.ENSGALP00000011863	2.2e-159	520.8					aveNOG[1]	0A501@biNOG,0DMVB@chorNOG,0VE15@meNOG,11KKA@NOG,137X1@opiNOG,1CWQY@veNOG,KOG4043@euNOG	KOG4043|1.8e-83|283.8	K	Mediator complex subunit 19
g_134	9031.ENSGALP00000011873	3.2e-206	676.2					aveNOG[1]	04FB7@aveNOG,09UAR@biNOG,0DFKB@chorNOG,0V59U@meNOG,0XVTA@NOG,12UBV@opiNOG,1CQ9Z@veNOG,KOG0914@euNOG	KOG0914|1.3e-107|364.7	O	thioredoxin-related transmembrane protein
g_135	13735.ENSPSIP00000005570	2.8e-33	105.5					aveNOG[1]	0A8M1@biNOG,0DV46@chorNOG,0IZ8H@euNOG,0VJHE@meNOG,0Y6GD@NOG,13T0E@opiNOG,1D4EQ@veNOG	0IZ8H|1.5e-32|116.6	S	chromosome 11 open reading frame 31
g_136	9598.ENSPTRP00000061103	7.3e-58	187.2					aveNOG[1]	09VQH@biNOG,0DM0C@chorNOG,0IWG8@euNOG,0RRWV@homNOG,0UQ34@maNOG,0VAEP@meNOG,0Y41A@NOG,13WY6@opiNOG,16B6G@prNOG,1B5BC@spriNOG,1CVV7@veNOG	0IWG8|7.3e-51|177.6	S	BTB (POZ) domain containing 18
g_138	59729.ENSTGUP00000007313	0	2050.1			K05690		aveNOG[1]	04NGQ@aveNOG,09VN6@biNOG,0DFQ2@chorNOG,0V6M9@meNOG,0Y21Q@NOG,135V5@opiNOG,1CRKW@veNOG,KOG1048@euNOG	KOG1048|3.9e-182|611.1	T, W	Plakophilin
g_139	9031.ENSGALP00000032039	2.9e-222	725.6	LPXN				aveNOG[1]	04JYC@aveNOG,09VI1@biNOG,0DGSR@chorNOG,0V6HB@meNOG,0XRD4@NOG,12Q3X@opiNOG,1CVWQ@veNOG,KOG1703@euNOG	04JYC|9.3e-212|705.6	T, Z	LIM
g_141	9103.ENSMGAP00000010074	2.1e-299	980.9					aveNOG[1]	04I6V@aveNOG,09WTZ@biNOG,0DI3W@chorNOG,0V7RY@meNOG,12P8D@opiNOG,1CSU9@veNOG,COG5048@NOG,KOG1721@euNOG	04I6V|0.0|1018.4	K	ZnF_C2H2
g_142	9031.ENSGALP00000011774	5.6e-117	378.8	CNTF	GO:0005575,GO:0005622,GO:0005623,GO:0005737,GO:0044424,GO:0044464	K05420		aveNOG[1]	04N4M@aveNOG,0A3CA@biNOG,0DJ65@chorNOG,0IGEN@euNOG,0VE70@meNOG,0YYIH@NOG,13PI7@opiNOG,1D046@veNOG	0IGEN|7.1e-84|283.9	T	ciliary neurotrophic factor
g_144	28377.ENSACAP00000006631	0	1224.4					aveNOG[1]	09TIV@biNOG,0DEVG@chorNOG,0IEMS@euNOG,0V4HT@meNOG,11EY2@NOG,139G2@opiNOG,1CPJ6@veNOG	0IEMS|9.7e-271|904.8	O	Deltex homolog
g_145	9103.ENSMGAP00000016731	0	1572.1					aveNOG[1]	04M3Z@aveNOG,09TAQ@biNOG,0DEN1@chorNOG,0IER6@euNOG,0V49U@meNOG,0ZMVS@NOG,13J6W@opiNOG,1CPBW@veNOG	0IER6|3.3e-300|1001.3	U	macrophage expressed 1
g_146	9031.ENSGALP00000014800	0	1894.4					aveNOG[1]	04NDP@aveNOG,09XSX@biNOG,0DEP1@chorNOG,0IHBC@euNOG,0V8QG@meNOG,0XQVR@NOG,12TK3@opiNOG,1CSUG@veNOG	0IHBC|9.2e-197|660.2	S	scavenger receptor cysteine rich domain containing
g_147	7897.ENSLACP00000017330	0	1868.1					aveNOG[1]	09XSX@biNOG,0DEP1@chorNOG,0IHBC@euNOG,0V8QG@meNOG,0XQVR@NOG,12TK3@opiNOG,1CSUG@veNOG	0IHBC|5.7e-195|654.2	S	scavenger receptor cysteine rich domain containing
g_150	9031.ENSGALP00000038030	8.6e-124	405.5	FTH1	GO:0002376,GO:0006955,GO:0008150,GO:0008285,GO:0042127,GO:0048519,GO:0048523,GO:0050789,GO:0050794,GO:0050896,GO:0065007	K00522		aveNOG[1]	04MZF@aveNOG,0A2H2@biNOG,0DGNE@chorNOG,0VDD3@meNOG,13RI4@opiNOG,1CZ5U@veNOG,COG1528@NOG,KOG2332@euNOG	KOG2332|2.3e-107|363.5	P	Stores iron in a soluble, non-toxic, readily available form. Important for iron homeostasis (By similarity)
g_151	9103.ENSMGAP00000009802	0	1042.1			K13878		aveNOG[1]	04HWI@aveNOG,09TFS@biNOG,0DESR@chorNOG,0V4EV@meNOG,0XS3J@NOG,12RN2@opiNOG,1CPGH@veNOG,KOG3547@euNOG	KOG3547|2.8e-219|734.7	T	bestrophin
g_152	9031.ENSGALP00000011643	3.9e-83	270.2	RAB3IL1		K16779		aveNOG[1]	04IH0@aveNOG,09WND@biNOG,0DHXZ@chorNOG,0V7KY@meNOG,0XPSY@NOG,12R8Z@opiNOG,1CSNJ@veNOG,KOG4324@euNOG	KOG4324|1.7e-25|93.8	U	RAB3A interacting protein
g_153	9031.ENSGALP00000011607	2.3e-228	751.8			K10226		aveNOG[1]	04FG1@aveNOG,09Y46@biNOG,0DJHD@chorNOG,0V91N@meNOG,0XVSZ@NOG,12SGY@opiNOG,1CSZY@veNOG,KOG4232@euNOG	KOG4232|6.9e-80|273.2	I	Fatty acid desaturase
g_154	9031.ENSGALP00000011533	4.6e-229	754.3	FADS1		K10224		aveNOG[1]	04H8D@aveNOG,09Y46@biNOG,0DJHD@chorNOG,0V91N@meNOG,0XVSZ@NOG,12SGY@opiNOG,1CSZY@veNOG,KOG4232@euNOG	KOG4232|1.3e-78|269.0	I	Fatty acid desaturase
g_155	423536.XP_002784278.1	3.5e-63	203.9					aveNOG[1]	0XVSZ@NOG,COG5274@NOG,KOG0536@euNOG,KOG0537@euNOG,KOG4232@euNOG	KOG4232|8.6e-14|54.5	I	Fatty acid desaturase
g_165	9031.ENSGALP00000011197	3.5e-72	229.4	CHKA				aveNOG[1]	04GA5@aveNOG,09YMM@biNOG,0DK25@chorNOG,0V9JE@meNOG,12TK5@opiNOG,1CUVX@veNOG,COG0510@NOG,KOG2686@euNOG	04GA5|1.5e-60|208.9	I	Choline/ethanolamine kinase
g_166	7897.ENSLACP00000021075	8.1e-76	243.7					aveNOG[1]	0B616@biNOG,0E98S@chorNOG,0IT33@euNOG,0WIQC@meNOG,11IUX@NOG,13FKP@opiNOG,1DG4B@veNOG	0IT33|3.3e-90|306.3	T, U	C2 domain
g_167	9031.ENSGALP00000011167	4.1e-307	1005.2	RNH1		K16634		aveNOG[1]	04K8A@aveNOG,09XGZ@biNOG,0DIUG@chorNOG,0V8F0@meNOG,0ZBX3@NOG,12QJ4@opiNOG,1CTJT@veNOG,KOG4308@euNOG	04K8A|0.0|1011.2	S	LRR
g_170	9103.ENSMGAP00000009442	0	1059.2					aveNOG[1]	04JU8@aveNOG,09V4S@biNOG,0DNW3@chorNOG,0V64F@meNOG,12PQW@opiNOG,1CXTI@veNOG,COG5210@NOG,KOG1102@euNOG	KOG1102|9e-114|384.9	G	GTPase Activating protein
g_171	9685.ENSFCAP00000017236	8.4e-128	410.1					aveNOG[1]	09V8I@biNOG,0CNR7@carNOG,0DGH2@chorNOG,0UIAK@maNOG,0V681@meNOG,12SNY@opiNOG,1CR6Q@veNOG,COG1100@NOG,KOG0395@euNOG	0CNR7|3.7e-135|452.9	T	RAS
g_175	13735.ENSPSIP00000016526	3.5e-76	248.3					aveNOG[1]	0A30M@biNOG,0DQN5@chorNOG,0V9HX@meNOG,12R9N@opiNOG,1CZQY@veNOG,COG4886@NOG,KOG0531@euNOG	1CZQY|1.4e-23|87.4	T	leucine rich repeat containing 56
g_176	9031.ENSGALP00000011120	3.6e-283	933	RASSF7		K09855		aveNOG[1]	04NVX@aveNOG,0A06N@biNOG,0DMST@chorNOG,0V640@meNOG,0XPWB@NOG,13I7Z@opiNOG,1CWN8@veNOG,KOG1574@euNOG	KOG1574|1.5e-82|282.3	W	ras association (RalGDS AF-6) domain family (N-terminal) member
g_178	9103.ENSMGAP00000009395	2.2e-289	951					aveNOG[1]	0ACVR@biNOG,0DXKW@chorNOG,0VQ20@meNOG,142CB@opiNOG,COG4886@NOG,KOG0619@euNOG	142CB|1.7e-285|953.7	T	malignant fibrous histiocytoma-amplified sequence
g_179	9103.ENSMGAP00000019214	4.3e-291	957.3		GO:0002218,GO:0002221,GO:0002224,GO:0002253,GO:0002376,GO:0002682,GO:0002684,GO:0002757,GO:0002758,GO:0002764,GO:0005575,GO:0005622,GO:0005623,GO:0005634,GO:0007154,GO:0007165,GO:0008150,GO:0009987,GO:0023052,GO:0031347,GO:0031349,GO:0034138,GO:0043226,GO:0043227,GO:0043229,GO:0043231,GO:0044424,GO:0044464,GO:0044699,GO:0044700,GO:0044763,GO:0045088,GO:0045089,GO:0048518,GO:0048583,GO:0048584,GO:…			aveNOG[1]	04M5U@aveNOG,09VYE@biNOG,0DH74@chorNOG,0IWNR@euNOG,0V6WU@meNOG,11G85@NOG,13QBS@opiNOG,1CRX8@veNOG	0IWNR|8.9e-161|540.1	K	interferon regulatory factor 7
g_180	9031.ENSGALP00000000410	1.9e-212	691.4	SLC25A22		K15107		aveNOG[1]	04MJ3@aveNOG,09Y0H@biNOG,0DJDJ@chorNOG,0V5W4@meNOG,0Y240@NOG,12U0A@opiNOG,1CU5V@veNOG,KOG0750@euNOG	04MJ3|1.1e-221|738.5	C	solute carrier family 25 (mitochondrial carrier glutamate), member 22
g_182	9031.ENSGALP00000022986	0	1899.2	PIDD				aveNOG[1]	04QQN@aveNOG,0B3M8@biNOG,0E7SH@chorNOG,0WG11@meNOG,13BRF@opiNOG,1DESC@veNOG,COG4886@NOG,KOG0619@euNOG,KOG4177@euNOG	04QQN|0.0|1936.2	M, Z	p53-induced death domain protein
g_184	9031.ENSGALP00000023089	8.1e-71	229.4	RPLP2		K02943		aveNOG[1]	04Q32@aveNOG,0A9MS@biNOG,0DVP0@chorNOG,0VMI8@meNOG,13WA7@opiNOG,1D52A@veNOG,COG2058@NOG,KOG3449@euNOG	KOG3449|1.9e-50|175.5	J	60S acidic ribosomal protein
g_185	9031.ENSGALP00000023449	5.4e-273	893.7	PNPLA2		K16816		aveNOG[1]	04MA8@aveNOG,0A14A@biNOG,0DMZR@chorNOG,0VC0K@meNOG,0XSQS@NOG,13HN5@opiNOG,1CV8R@veNOG,KOG3773@euNOG	04MA8|2.5e-275|917.3	I	patatin-like phospholipase domain containing 2
g_186	9103.ENSMGAP00000009284	1.2e-220	725.7					aveNOG[1]	04QMM@aveNOG,0A20R@biNOG,0E70F@chorNOG,0IVA9@euNOG,0VCVV@meNOG,0Z5VW@NOG,12SQK@opiNOG,1DDX5@veNOG	0IVA9|1.3e-247|827.1	T	EF-hand calcium binding domain 4A
g_190	10116.ENSRNOP00000007328	9.3e-34	110.1					aveNOG[1]	0A1ET@biNOG,0DP28@chorNOG,0UU2V@maNOG,0VCA9@meNOG,11IRY@NOG,13I7V@opiNOG,18XYP@roNOG,1B2H1@spriNOG,1CY07@veNOG,KOG3882@euNOG	0VCA9|3.2e-08|37.2	S	tetraspanin
g_196	9031.ENSGALP00000010852	1.1e-275	907					aveNOG[1]	09T5X@biNOG,0DJ79@chorNOG,0V44Q@meNOG,0XNSK@NOG,12RES@opiNOG,1CV1H@veNOG,KOG1216@euNOG	0DJ79|4.4e-107|362.5	V, W	oligomeric mucus gel-forming
g_197	9103.ENSMGAP00000008881	4e-94	302.8					aveNOG[1]	04FX9@aveNOG,09T5X@biNOG,0DJ79@chorNOG,0V44Q@meNOG,0XNSK@NOG,12RES@opiNOG,1CV1H@veNOG,KOG1216@euNOG	04FX9|0.0|1178.4	V, W	CT
g_198	9103.ENSMGAP00000008878	1.4e-117	381	MUC				aveNOG[1]	04KXV@aveNOG,09T5X@biNOG,0DJ79@chorNOG,0V44Q@meNOG,0XNSK@NOG,12RES@opiNOG,1CV1H@veNOG,KOG1216@euNOG	04KXV|0.0|1157.9	V, W	Trypsin Inhibitor like cysteine rich domain
g_202	9103.ENSMGAP00000008743	2.7e-161	529.2	MOB2				aveNOG[1]	04F63@aveNOG,09ZDS@biNOG,0DKW5@chorNOG,0VAAT@meNOG,0XSUJ@NOG,13JVP@opiNOG,1CVR9@veNOG,KOG0440@euNOG	KOG0440|5.3e-93|316.5	D	MOB kinase activator
g_204	13735.ENSPSIP00000001037	4.5e-108	352.1					aveNOG[1]	0A7Y3@biNOG,0DUNI@chorNOG,0VIT8@meNOG,12PBX@opiNOG,1D3XX@veNOG,COG2801@NOG,KOG0017@euNOG	0DUNI|2.4e-121|409.9	L	Inherit from opiNOG: to reverse transcriptase
g_206	9031.ENSGALP00000010737	0	1145.9	DUSP8		K04459		aveNOG[1]	04FCR@aveNOG,09WEM@biNOG,0DHPX@chorNOG,0V7D4@meNOG,13117@opiNOG,1CSEB@veNOG,COG2453@NOG,KOG1716@euNOG	04FCR|0.0|1192.7	V	dual specificity phosphatase 8
g_207	9103.ENSMGAP00000008726	6.7e-82	259.5	DUSP8		K04459		aveNOG[1]	04FCR@aveNOG,09WEM@biNOG,0DHPX@chorNOG,0V7D4@meNOG,13117@opiNOG,1CSEB@veNOG,COG2453@NOG,KOG1716@euNOG	04FCR|5.9e-77|263.4	V	dual specificity phosphatase 8
g_209	28377.ENSACAP00000009135	2.4e-109	354.7					aveNOG[1]	09V2C@biNOG,0DGBP@chorNOG,0J92W@euNOG,0V61Z@meNOG,114HW@NOG,13WPD@opiNOG,1CR15@veNOG	0J92W|2.3e-98|332.1	S	Interferon induced transmembrane protein 10
g_210	9031.ENSGALP00000010662	2.3e-277	906.6	CTSD	GO:0000323,GO:0005575,GO:0005622,GO:0005623,GO:0005737,GO:0005764,GO:0005773,GO:0043226,GO:0043227,GO:0043229,GO:0043231,GO:0044424,GO:0044444,GO:0044464	K01379		aveNOG[1]	04NCE@aveNOG,09WCZ@biNOG,0DMHG@chorNOG,0VAUW@meNOG,0XNV7@NOG,12RM2@opiNOG,1CWCR@veNOG,KOG1339@euNOG	04NCE|3.5e-271|902.4	O	Cathepsin D
g_211	9031.ENSGALP00000010653	3.6e-209	681.1					aveNOG[1]	04G88@aveNOG,0A3PV@biNOG,0DRAI@chorNOG,0KGFG@euNOG,0VEIP@meNOG,0XPRD@NOG,12X22@opiNOG,1D0FW@veNOG	0KGFG|1.1e-207|692.3	F	Cytosolic 5'-nucleotidase
g_212	9031.ENSGALP00000010643	1.2e-261	856.5	SYT8		K19908		aveNOG[1]	04R0T@aveNOG,0B61F@biNOG,0E98Y@chorNOG,0IT3C@euNOG,0WIQM@meNOG,10NSB@NOG,13FKY@opiNOG,1DG4G@veNOG	0IT3C|5.6e-203|677.9	T, U	synaptotagmin VIII
g_213	9031.ENSGALP00000032067	3.3e-112	368.3	TNNI2				aveNOG[1]	04H7R@aveNOG,0A2QQ@biNOG,0DH62@chorNOG,0VFHU@meNOG,0Y9IX@NOG,13KDE@opiNOG,1CZE9@veNOG,KOG3977@euNOG	KOG3977|1.9e-54|188.7	Z	Troponin I type
g_214	9031.ENSGALP00000010618	5.1e-211	687.3	LSP1		K14957		aveNOG[1]	04FFS@aveNOG,0A5RQ@biNOG,0DSFT@chorNOG,0VCRI@meNOG,0XRW9@NOG,13MTQ@opiNOG,1D2A1@veNOG,KOG3656@euNOG	04FFS|1.3e-218|728.9	T	Caldesmon
g_215	9103.ENSMGAP00000008414	3.8e-86	277					aveNOG[1]	04P5I@aveNOG,0AJQE@biNOG,0DWYR@chorNOG,0JJKB@euNOG,0VYGC@meNOG,115XT@NOG,149GA@opiNOG,1D64K@veNOG	0JJKB|8.7e-79|268.1	S	NA
g_216	9031.ENSGALP00000038406	4.1e-119	389.3					aveNOG[1]	09UCC@biNOG,0DFN0@chorNOG,0V5BI@meNOG,0XS6A@NOG,13FHW@opiNOG,1CQBJ@veNOG,KOG3634@euNOG	KOG3634|6.7e-79|270.1	Z	Troponin T type
g_217	9103.ENSMGAP00000008142	9.8e-64	205.4	MRPL23		K02892		aveNOG[1]	04KC0@aveNOG,09VNI@biNOG,0DU5K@chorNOG,0VI4H@meNOG,11IAB@NOG,13R79@opiNOG,1D3GM@veNOG,KOG4089@euNOG	KOG4089|4.8e-44|155.1	J	Ribosomal protein
g_218	9103.ENSMGAP00000008129	2e-128	416.3	IGF2	GO:0005575,GO:0005576	K13769		aveNOG[1]	04MEM@aveNOG,0A630@biNOG,0DMSM@chorNOG,0IY3P@euNOG,0VG2N@meNOG,11KP2@NOG,13SBM@opiNOG,1CZ8G@veNOG	0IY3P|8.6e-87|293.8	T	insulin-like growth factor 2 (somatomedin A)
g_220	9031.ENSGALP00000010567	2.3e-75	241.3	INS	GO:0001654,GO:0003407,GO:0005575,GO:0005576,GO:0007275,GO:0007423,GO:0008150,GO:0010941,GO:0032501,GO:0032502,GO:0042981,GO:0043010,GO:0043066,GO:0043067,GO:0043069,GO:0044699,GO:0044707,GO:0044767,GO:0048513,GO:0048519,GO:0048523,GO:0048731,GO:0048856,GO:0050789,GO:0050794,GO:0060041,GO:0060548,GO:0065007	K04526		aveNOG[1]	04PKC@aveNOG,0A9RV@biNOG,0DV3D@chorNOG,0J0XC@euNOG,0VJG4@meNOG,11VJB@NOG,13V2W@opiNOG,1D4DX@veNOG	0J0XC|5.2e-40|141.5	T	Insulin decreases blood glucose concentration. It increases cell permeability to monosaccharides, amino acids and fatty acids. It accelerates glycolysis, the pentose phosphate cycle, and glycogen synthesis in liver
g_221	9031.ENSGALP00000010566	0	1118.4	TH		K00501		aveNOG[1]	04NHR@aveNOG,09V2Z@biNOG,0DJUH@chorNOG,0V93G@meNOG,12SID@opiNOG,1CUMQ@veNOG,COG3186@NOG,KOG3820@euNOG	KOG3820|1.6e-221|741.0	E	hydroxylase
g_222	59729.ENSTGUP00000009565	2e-80	259.9					aveNOG[1]	0B5W9@biNOG,0E95H@chorNOG,0ISUZ@euNOG,0WIJ4@meNOG,0Y0IE@NOG,13FDB@opiNOG	0ISUZ|9.7e-54|187.0	K	achaete-scute complex homolog 2 (Drosophila)
g_224	9031.ENSGALP00000010564	3.3e-149	485.9			K17359		aveNOG[1]	04M5G@aveNOG,0A59J@biNOG,0DSMD@chorNOG,0IY3A@euNOG,0VG53@meNOG,0YXBH@NOG,13RRS@opiNOG,1D1RB@veNOG	0IY3A|2.5e-101|342.7	U	tetraspanin 32
g_225	9103.ENSMGAP00000008045	7.9e-161	520.8	CD81		K06508		aveNOG[1]	04IPC@aveNOG,09YGE@biNOG,0DFR3@chorNOG,0V9E8@meNOG,11IRY@NOG,13KZI@opiNOG,1CQEQ@veNOG,KOG3882@euNOG	04IPC|2.2e-159|532.0	T	Tetraspanin family
g_232	13735.ENSPSIP00000009573	1.2e-58	191.7					aveNOG[1]	0A02A@biNOG,0DMMW@chorNOG,0VAYP@meNOG,0XXN5@NOG,13IFC@opiNOG,1CWHH@veNOG,KOG4743@euNOG	KOG4743|4.5e-44|154.2	T	cyclin-dependent kinase inhibitor
g_233	9103.ENSMGAP00000007935	5.1e-72	230.7					aveNOG[1]	0B3XJ@biNOG,0E7Z5@chorNOG,0IP9V@euNOG,0WGCJ@meNOG,13C9Q@opiNOG,1DEYM@veNOG,COG0477@NOG	0IP9V|1.6e-52|182.2	G	solute carrier family 22, member
g_234	9031.ENSGALP00000010391	5.1e-87	279.5					aveNOG[1]	0A6W2@biNOG,0DUDW@chorNOG,0IZC3@euNOG,0VHQ6@meNOG,11IXF@NOG,13SSK@opiNOG,1D36Q@veNOG	0IZC3|2e-66|225.7	T	Pleckstrin homology-like domain family A member 2
g_245	9031.ENSGALP00000010262	1.2e-92	300.2	TMEM86A				aveNOG[1]	04K8Q@aveNOG,0A03G@biNOG,0DNQF@chorNOG,0VBYT@meNOG,0ZQJ5@NOG,13HYY@opiNOG,1CXMT@veNOG,KOG4804@euNOG	KOG4804|1.4e-50|176.0	J	Transmembrane protein 86A
g_253	9031.ENSGALP00000010114	1e-93	299.7	HPS5				aveNOG[1]	04KDF@aveNOG,09X3P@biNOG,0DIER@chorNOG,0V827@meNOG,11FBT@NOG,13JEX@opiNOG,1CT5A@veNOG,KOG3621@euNOG	04KDF|7.8e-89|302.4	S	Hermansky-Pudlak syndrome 5
g_255	13735.ENSPSIP00000001037	1.7e-111	363.1					aveNOG[1]	0A7Y3@biNOG,0DUNI@chorNOG,0VIT8@meNOG,12PBX@opiNOG,1D3XX@veNOG,COG2801@NOG,KOG0017@euNOG	0DUNI|4e-123|415.8	L	Inherit from opiNOG: to reverse transcriptase
g_256	9103.ENSMGAP00000007373	1.8e-202	664					aveNOG[1]	04K1G@aveNOG,0A2P5@biNOG,0DQAQ@chorNOG,0IMST@euNOG,0VDIY@meNOG,10KPS@NOG,13JYM@opiNOG,1CZCQ@veNOG	0IMST|8.8e-137|461.2	S	Serum amyloid A-like 1
g_257	9103.ENSMGAP00000019035	0	1016.8	TPH1		K00502		aveNOG[1]	04K0H@aveNOG,09V2Z@biNOG,0DMSC@chorNOG,0V93G@meNOG,12SID@opiNOG,1CWMX@veNOG,COG3186@NOG,KOG3820@euNOG	KOG3820|1.3e-258|863.5	E	hydroxylase
g_260	9031.ENSGALP00000010023	7.7e-223	734.7	KCNC1	GO:0003674,GO:0005215,GO:0005216,GO:0005244,GO:0005249,GO:0005251,GO:0005261,GO:0005267,GO:0006810,GO:0006811,GO:0006812,GO:0006813,GO:0008150,GO:0008324,GO:0009987,GO:0015075,GO:0015077,GO:0015079,GO:0015267,GO:0015672,GO:0022803,GO:0022832,GO:0022836,GO:0022838,GO:0022839,GO:0022843,GO:0022857,GO:0022890,GO:0022891,GO:0022892,GO:0030001,GO:0032879,GO:0034220,GO:0034762,GO:0034765,GO:0043269,GO:…	K04887		aveNOG[1]	04GI2@aveNOG,09X3G@biNOG,0DIEJ@chorNOG,0V820@meNOG,12QY3@opiNOG,1CT54@veNOG,COG1226@NOG,KOG3713@euNOG	KOG3713|6.1e-118|398.7	P	PotAssium voltage-gated channel
g_261	7897.ENSLACP00000003942	1.5e-81	261.9					aveNOG[1]	0A6W5@biNOG,0DTUP@chorNOG,0VHQ9@meNOG,1429S@opiNOG,1D36R@veNOG,COG1226@NOG,KOG3713@euNOG	0A6W5|6.2e-94|319.6	P	Pfam:K_tetra
g_263	9031.ENSGALP00000038684	3.7e-198	650.7	MYOD1	GO:0000975,GO:0001067,GO:0003674,GO:0003676,GO:0003677,GO:0005488,GO:0005515,GO:0005575,GO:0005622,GO:0005623,GO:0005634,GO:0005654,GO:0005667,GO:0006355,GO:0006357,GO:0008150,GO:0009889,GO:0009891,GO:0009893,GO:0009987,GO:0010468,GO:0010556,GO:0010557,GO:0010604,GO:0010628,GO:0019219,GO:0019222,GO:0030154,GO:0031323,GO:0031325,GO:0031326,GO:0031328,GO:0031974,GO:0031981,GO:0032502,GO:0032991,GO:…	K09064		aveNOG[1]	04KWE@aveNOG,09TRJ@biNOG,0DF1X@chorNOG,0V4QW@meNOG,11SED@NOG,13U2D@opiNOG,1CPRP@veNOG,KOG3960@euNOG	KOG3960|2.6e-82|280.7	K	myogenic factor
g_264	9031.ENSGALP00000010016	3.1e-120	391					aveNOG[1]	04R3R@aveNOG,0B6KP@biNOG,0E9N5@chorNOG,0IU10@euNOG,0WJBJ@meNOG,11T1W@NOG,13GDH@opiNOG,1DGGT@veNOG	0IU10|2e-96|326.0	P	ferritin, light polypeptide
g_267	9031.ENSGALP00000009950	1.8e-233	766.6	ABCC8				aveNOG[1]	04IEZ@aveNOG,09T9I@biNOG,0DKW7@chorNOG,0V48M@meNOG,12N3Q@opiNOG,1CVRB@veNOG,COG1132@NOG,KOG0054@euNOG	1CVRB|3.5e-213|714.7	Q	ATP-binding cassette, sub-family C (CFTR MRP), member
g_268	13037.EHJ77603	5.4e-125	411.9					aveNOG[1]	032DK@artNOG,09TF4@biNOG,0SPB0@inNOG,0TE84@lepNOG,0V8SK@meNOG,0XQ62@NOG,12P9R@opiNOG,KOG3827@euNOG	12P9R|1e-169|570.5	P	Potassium inwardly-rectifying channel, subfamily J, member
g_271	7897.ENSLACP00000019340	3.5e-64	211.2					aveNOG[1]	09UG0@biNOG,0DFRR@chorNOG,0V5FC@meNOG,13PPT@opiNOG,1CQFA@veNOG,COG0184@NOG,KOG0400@euNOG	KOG0400|3.7e-59|204.5	J	ribosomal protein s13
g_272	9606.ENSP00000347883	7.4e-45	141.7					aveNOG[1]	0B3QU@biNOG,0E7UY@chorNOG,0INUD@euNOG,0V2VU@maNOG,0WG4Y@meNOG,11YSB@NOG,13BWH@opiNOG,16NK5@prNOG,1BATM@spriNOG,1DEUN@veNOG	0INUD|1.1e-31|113.9	Z	Pleckstrin homology domain containing family A member
g_275	9031.ENSGALP00000009795	7.2e-43	137.7					aveNOG[1]	04PGM@aveNOG,0A5T7@biNOG,0DSPG@chorNOG,0IVYQ@euNOG,0VGNH@meNOG,11SCI@NOG,13QVX@opiNOG,1D21T@veNOG	0IVYQ|1.2e-36|130.5	S	chromosome 11 open reading frame 58
g_280	9031.ENSGALP00000019604	1.4e-78	253.1					aveNOG[1]	0AGKR@biNOG,0DZJW@chorNOG,0KFM2@euNOG,0VTIU@meNOG,10T76@NOG,12YMX@opiNOG,1D821@veNOG	0KFM2|1.2e-30|110.5	S	NA
g_281	9031.ENSGALP00000009731	8e-101	325.6	CYP2R1				aveNOG[1]	04NFI@aveNOG,09TUB@biNOG,0DKGM@chorNOG,0V59K@meNOG,12SZU@opiNOG,1CVAJ@veNOG,COG2124@NOG,KOG0156@euNOG	04NFI|3e-95|323.8	Q	Cytochrome P450
g_282	59729.ENSTGUP00000008739	2.4e-134	441.1	PDE3B		K13296		aveNOG[1]	04NQA@aveNOG,09W7K@biNOG,0DHGM@chorNOG,0IEGG@euNOG,0V75X@meNOG,0XT2V@NOG,12QSD@opiNOG,1CSXC@veNOG	0IEGG|4.3e-25|92.1	T	phosphodiesterase
g_292	9598.ENSPTRP00000005817	2.5e-104	333.9					aveNOG[1]	09U4F@biNOG,0DFE3@chorNOG,0RV2R@homNOG,0UGPF@maNOG,0V53H@meNOG,0YIJ3@NOG,12PNC@opiNOG,16C7A@prNOG,1ASE0@spriNOG,1CQ3V@veNOG,KOG0490@euNOG	0RV2R|9.8e-107|358.6	K	LIM domain only 1 (rhombotin 1)
g_295	13735.ENSPSIP00000001037	5e-112	365.4					aveNOG[1]	0A7Y3@biNOG,0DUNI@chorNOG,0VIT8@meNOG,12PBX@opiNOG,1D3XX@veNOG,COG2801@NOG,KOG0017@euNOG	0DUNI|1.5e-122|413.9	L	Inherit from opiNOG: to reverse transcriptase
g_296	9031.ENSGALP00000009552	2.2e-102	336	RPL27A		K02900		aveNOG[1]	04GNM@aveNOG,0A08J@biNOG,0DMV4@chorNOG,0VB4H@meNOG,13Q37@opiNOG,1CWQQ@veNOG,COG0200@NOG,KOG1742@euNOG	KOG1742|2.7e-86|291.8	J	60s ribosomal protein
g_297	9103.ENSMGAP00000006455	5.3e-155	508.2					aveNOG[1]	09Y1M@biNOG,0V8VV@meNOG,0XT3N@NOG,12TTD@opiNOG,KOG3569@euNOG	KOG3569|2.3e-82|281.5	T	DENN MADD domain containing
g_298	9103.ENSMGAP00000018101	5.1e-250	823.6					aveNOG[1]	0XT3N@NOG,KOG3569@euNOG	KOG3569|6.7e-74|253.5	T	DENN MADD domain containing
g_302	9103.ENSMGAP00000006371	2.6e-152	498.9	NRIP3				aveNOG[1]	04NNJ@aveNOG,09XJE@biNOG,0DIWY@chorNOG,0V8HE@meNOG,0XPA0@NOG,13NXC@opiNOG,1CTNF@veNOG,KOG0012@euNOG	KOG0012|1.6e-25|93.5	L	Nuclear receptor interacting protein
g_303	9823.ENSSSCP00000001667	1.9e-101	330.4					aveNOG[1]	09TSP@biNOG,0DF30@chorNOG,0UNBX@maNOG,0V4S0@meNOG,0XP6K@NOG,12SW5@opiNOG,1CPSU@veNOG,KOG1217@euNOG	09TSP|2e-48|169.0	T	Signal peptide, CUB domain, EGF-like
g_305	10090.ENSMUSP00000079295	8.9e-21	64.5					aveNOG[1]	09WE4@biNOG,0DHPD@chorNOG,0UJXC@maNOG,0V7CK@meNOG,0XNYP@NOG,12P30@opiNOG,194MW@roNOG,1ARXB@spriNOG,1CSDV@veNOG,KOG2080@euNOG	1ARXB|1e-14|57.4	T	DENN MADD domain containing 5A
g_310	9031.ENSGALP00000009252	8.5e-282	929.2					aveNOG[1]	09TFC@biNOG,0DFPD@chorNOG,0V4EF@meNOG,0XS1M@NOG,12QNR@opiNOG,1CQCW@veNOG,KOG0601@euNOG	KOG0601|3.4e-65|224.3	D	Protein kinase, membrane associated tyrosine threonine 1
g_312	9031.ENSGALP00000009219	9.8e-286	938.9					aveNOG[1]	09UXN@biNOG,0DG77@chorNOG,0IIJW@euNOG,0V5XK@meNOG,0XRWV@NOG,139RA@opiNOG,1CQWQ@veNOG	0IIJW|3.1e-188|631.1	T	SWAP switching B-cell complex 70kDa subunit
g_318	9031.ENSGALP00000009074	1.1e-102	333	ADM		K12333		aveNOG[1]	04PI3@aveNOG,0A3MP@biNOG,0DR8J@chorNOG,0IK4C@euNOG,0VEGM@meNOG,120TV@NOG,13HJB@opiNOG,1CVUC@veNOG	0IK4C|2.9e-71|242.8	T	adrenomedullin
g_323	9823.ENSSSCP00000014250	1.6e-213	696.6					aveNOG[1]	0B004@biNOG,0E5H9@chorNOG,0KCZ7@euNOG,0V0ZQ@maNOG,0WCGF@meNOG,0ZIZB@NOG,14T53@opiNOG,1DCH9@veNOG	0KCZ7|1.4e-204|685.9	J	Eukaryotic translation initiation factor 4 gamma
g_325	13735.ENSPSIP00000001037	8.6e-106	344.7					aveNOG[1]	0A7Y3@biNOG,0DUNI@chorNOG,0VIT8@meNOG,12PBX@opiNOG,1D3XX@veNOG,COG2801@NOG,KOG0017@euNOG	0DUNI|4.9e-122|412.2	L	Inherit from opiNOG: to reverse transcriptase
g_339	13735.ENSPSIP00000001775	2.9e-202	666					aveNOG[1]	09TYU@biNOG,0DF8W@chorNOG,0V4XR@meNOG,0XPWB@NOG,13JQI@opiNOG,1CPYH@veNOG,KOG1574@euNOG	KOG1574|6.9e-104|352.7	W	ras association (RalGDS AF-6) domain family (N-terminal) member
g_343	9031.ENSGALP00000008579	5.5e-78	249.4	PTH	GO:0005575,GO:0005576	K05261		aveNOG[1]	04PIE@aveNOG,0A8HK@biNOG,0DV27@chorNOG,0J02X@euNOG,0VIW7@meNOG,0ZH2H@NOG,13SXT@opiNOG,1D4CU@veNOG	0J02X|7.5e-46|159.0	K	Parathyroid hormone
g_345	9031.ENSGALP00000008475	4.9e-71	225.9	CYB5R2	GO:0005575,GO:0016020	K00326		aveNOG[1]	04FKN@aveNOG,09TJ4@biNOG,0DF8U@chorNOG,0V4I2@meNOG,12N8U@opiNOG,1CVKV@veNOG,COG0543@NOG,KOG0534@euNOG	04FKN|3.1e-64|220.5	M	Oxidoreductase FAD-binding domain
g_347	8128.ENSONIP00000007023	1.5e-25	78.4					aveNOG[1]	0B620@biNOG,0E99H@chorNOG,0NCUP@fiNOG,0WIR7@meNOG,0XQZ9@NOG,13FMN@opiNOG,1DG50@veNOG,KOG1028@euNOG	0NCUP|2.7e-20|76.3	T, U	synaptotagmin IX
g_349	9031.ENSGALP00000019604	7.6e-42	131.5					aveNOG[1]	0AGKR@biNOG,0DZJW@chorNOG,0KFM2@euNOG,0VTIU@meNOG,10T76@NOG,12YMX@opiNOG,1D821@veNOG	0KFM2|3.4e-21|79.5	S	NA
g_351	9483.ENSCJAP00000031978	1.1e-77	255.3					aveNOG[1]	0A1X7@biNOG,0DPJA@chorNOG,0US4M@maNOG,0VAXA@meNOG,0XZ8W@NOG,12P63@opiNOG,16H0W@prNOG,1B26G@spriNOG,1CYI2@veNOG,KOG3632@euNOG	0DPJA|4.9e-134|452.6	T	RIMS binding protein
g_352	9483.ENSCJAP00000031978	8.9e-82	268.6					aveNOG[1]	0A1X7@biNOG,0DPJA@chorNOG,0US4M@maNOG,0VAXA@meNOG,0XZ8W@NOG,12P63@opiNOG,16H0W@prNOG,1B26G@spriNOG,1CYI2@veNOG,KOG3632@euNOG	0DPJA|2.5e-136|460.2	T	RIMS binding protein
g_354	7739.JGI125498	1.3e-47	153.9					aveNOG[1]	0B4VF@biNOG,0E8IC@chorNOG,0IR0P@euNOG,0WHEC@meNOG,0XX1S@NOG,13DQR@opiNOG	0IR0P|6.9e-65|223.6	W	spondin 2, extracellular matrix protein
g_358	9031.ENSGALP00000039241	3.1e-54	174.3					aveNOG[1]	0A6PS@biNOG,0DTPC@chorNOG,0J2R7@euNOG,0VHHN@meNOG,0YZB9@NOG,13WD1@opiNOG,1D311@veNOG	0J2R7|3.7e-34|122.2	S	chromosome 11 open reading frame 91
g_359	59729.ENSTGUP00000005251	2.7e-214	702.5					aveNOG[1]	04N63@aveNOG,09WV8@biNOG,0DI59@chorNOG,0IVCV@euNOG,0V7T6@meNOG,0ZTDZ@NOG,13IK1@opiNOG,1CSVP@veNOG	0IVCV|1.1e-227|763.4	S	KIAA1549-like
g_365	9646.ENSAMEP00000007619	1.6e-173	568.9					aveNOG[1]	09Y5R@biNOG,0CM0W@carNOG,0DK10@chorNOG,0UNXH@maNOG,0V938@meNOG,12QYE@opiNOG,1CUUX@veNOG,COG5107@NOG,KOG1914@euNOG	KOG1914|3.3e-115|389.8	A	cleavage stimulation factor, 3 pre-RNA, subunit 3, 77kDa
g_366	61853.ENSNLEP00000021744	1.4e-20	60.4					aveNOG[1]	0AQRQ@biNOG,0E782@chorNOG,0KH4B@euNOG,0V26I@maNOG,0W3A0@meNOG,0ZQXJ@NOG,12VQV@opiNOG,16NDE@prNOG,1BAIZ@spriNOG,1DE3V@veNOG	0KH4B|1e-16|64.6	S	Inherit from NOG: DEP domain containing
g_375	9031.ENSGALP00000019761	2.9e-162	527	WT1	GO:0001655,GO:0001822,GO:0003674,GO:0005488,GO:0005575,GO:0005622,GO:0005623,GO:0005634,GO:0006355,GO:0007275,GO:0008150,GO:0008270,GO:0009653,GO:0009790,GO:0009792,GO:0009887,GO:0009889,GO:0010468,GO:0010556,GO:0019219,GO:0019222,GO:0031323,GO:0031326,GO:0032501,GO:0032502,GO:0043009,GO:0043167,GO:0043169,GO:0043226,GO:0043227,GO:0043229,GO:0043231,GO:0044424,GO:0044464,GO:0044699,GO:0044707,GO:…	K09234		aveNOG[1]	04J3U@aveNOG,09ZPQ@biNOG,0DM7J@chorNOG,0VAKE@meNOG,12XVR@opiNOG,1CW2N@veNOG,COG5048@NOG,KOG1721@euNOG	04J3U|1.3e-164|552.0	K	Wilm's tumour protein
g_376	9031.ENSGALP00000039313	1.2e-215	709.3	RCN1				aveNOG[1]	04JWE@aveNOG,09TQW@biNOG,0DF13@chorNOG,0V4Q6@meNOG,0XRVE@NOG,12PP3@opiNOG,1CPQY@veNOG,KOG4223@euNOG	KOG4223|2.2e-107|363.7	T, U	EF-hand calcium binding domain
g_382	7668.SPU_014539tr	2.3e-63	207.9					aveNOG[1]	09TPH@biNOG,0V4NP@meNOG,0ZT0S@NOG,12NAX@opiNOG,KOG3862@euNOG	12NAX|4.7e-86|294.0	K	Paired box
g_384	9031.ENSGALP00000039329	1.1e-168	555.1	PAX6	GO:0005575,GO:0005622,GO:0005623,GO:0005634,GO:0043226,GO:0043227,GO:0043229,GO:0043231,GO:0044424,GO:0044464	K08031		aveNOG[1]	04K1P@aveNOG,09TJJ@biNOG,0DEWB@chorNOG,0V4IJ@meNOG,0XS01@NOG,12N8Z@opiNOG,1CPJX@veNOG,KOG0849@euNOG	KOG0849|3.8e-50|174.6	K	Paired box
g_385	9031.ENSGALP00000019786	3.2e-24	79.2	ELP4		K11375		aveNOG[1]	04FRD@aveNOG,09VYP@biNOG,0DH7D@chorNOG,0V6X2@meNOG,0XP5H@NOG,13HM4@opiNOG,1CRXI@veNOG,KOG3949@euNOG	KOG3949|2.5e-07|33.8	B, K	Elongator complex protein
g_393	9031.ENSGALP00000019808	0	1500.8	KCNA4		K04877		aveNOG[1]	04GSX@aveNOG,09UK7@biNOG,0DFVW@chorNOG,0V5JH@meNOG,12QRV@opiNOG,1CQJ8@veNOG,COG1226@NOG,KOG1545@euNOG	KOG1545|1.1e-236|790.7	P	potassium voltage-gated channel shaker-related subfamily member
g_399	9103.ENSMGAP00000016301	3.4e-171	558.3	BDNF	GO:0005575,GO:0005576,GO:0005622,GO:0005623,GO:0005737,GO:0044424,GO:0044444,GO:0044464,GO:0048471	K04355		aveNOG[1]	04IDY@aveNOG,09X3F@biNOG,0DIEI@chorNOG,0IH7X@euNOG,0V81Z@meNOG,0XRPH@NOG,133W8@opiNOG,1CT52@veNOG	0IH7X|8.4e-149|497.8	T	During development, promotes the survival and differentiation of selected neuronal populations of the peripheral and central nervous systems. Participates in axonal growth, pathfinding and in the modulation of dendritic growth and morphology. Major regulator of synaptic transmission and plasticity at adult synapses in many regions of the CNS
g_402	9031.ENSGALP00000019877	3.8e-39	120.8	LGR4		K04309		aveNOG[1]	04R3C@aveNOG,0B6HX@biNOG,0E9KH@chorNOG,0WJ8H@meNOG,13G8G@opiNOG,1DGFD@veNOG,COG4886@NOG,KOG0619@euNOG,KOG2087@euNOG	04R3C|5.3e-27|97.8	T	leucine-rich repeat containing G protein-coupled receptor 4
g_403	9031.ENSGALP00000019877	6e-120	384.2	LGR4		K04309		aveNOG[1]	04R3C@aveNOG,0B6HX@biNOG,0E9KH@chorNOG,0WJ8H@meNOG,13G8G@opiNOG,1DGFD@veNOG,COG4886@NOG,KOG0619@euNOG,KOG2087@euNOG	04R3C|2.6e-122|413.3	T	leucine-rich repeat containing G protein-coupled receptor 4
g_405	9031.ENSGALP00000021676	1.1e-182	598.9	BBOX1		K00471		aveNOG[1]	04NKT@aveNOG,0A0GG@biNOG,0DRFQ@chorNOG,0VF3N@meNOG,13INN@opiNOG,1D0GT@veNOG,COG2175@NOG,KOG3888@euNOG	KOG3888|2.9e-103|350.2	I	butyrobetaine (gamma), 2-oxoglutarate dioxygenase (gamma-butyrobetaine hydroxylase) 1
g_407	9031.ENSGALP00000018705	3.3e-37	119.2	DYNC1LI1	GO:0005575,GO:0005622,GO:0005623,GO:0005856,GO:0043226,GO:0043228,GO:0043229,GO:0043232,GO:0044424,GO:0044464	K10416		aveNOG[1]	04FVG@aveNOG,09YFP@biNOG,0DIXM@chorNOG,0V9DH@meNOG,0XQS4@NOG,12PZ3@opiNOG,1CUP5@veNOG,KOG3905@euNOG	KOG3905|2.6e-07|33.5	N	Dynein cytoplasmic 1 light intermediate chain
g_410	9103.ENSMGAP00000011751	2.4e-127	414.6					aveNOG[1]	09YC9@biNOG,0V7WH@meNOG,0XQQJ@NOG,12RWS@opiNOG,KOG2471@euNOG	KOG2471|1.7e-72|248.6	K	Ccr4-not transcription complex, subunit
g_412	9305.ENSSHAP00000020507	0	1252.8					aveNOG[1]	0B6BX@biNOG,0E9GK@chorNOG,0ITG8@euNOG,0V3UW@maNOG,0WJ1T@meNOG,0XSQC@NOG,13FZU@opiNOG,1DGBU@veNOG	0V3UW|0.0|1381.7	O	tripartite motif containing 71, E3 ubiquitin protein ligase
g_413	9593.ENSGGOP00000016715	2e-114	369.7					aveNOG[1]	0B6BX@biNOG,0E9GK@chorNOG,0ITG8@euNOG,0S31K@homNOG,0V3UW@maNOG,0WJ1T@meNOG,0XSQC@NOG,13FZU@opiNOG,16P6E@prNOG,1BBHU@spriNOG,1DGBU@veNOG	0S31K|8.5e-115|388.1	K	tripartite motif containing 71, E3 ubiquitin protein ligase
g_423	9031.ENSGALP00000018758	0	1332.1	GTDC2	GO:0005575,GO:0005576	K18207		aveNOG[1]	04JYN@aveNOG,0A13W@biNOG,0DITE@chorNOG,0VC05@meNOG,0ZHQA@NOG,13JR0@opiNOG,1CTIS@veNOG,KOG4698@euNOG	KOG4698|4.1e-71|244.0	K	Glycosyltransferase
g_424	9031.ENSGALP00000018761	7.3e-222	728.5					aveNOG[1]	04KDB@aveNOG,09VRY@biNOG,0DH0H@chorNOG,0IEN8@euNOG,0V6QW@meNOG,103BS@NOG,12PG1@opiNOG,1CRQT@veNOG	0IEN8|4.4e-180|604.0	S	family with sequence similarity 198, member A
g_425	9031.ENSGALP00000036869	5.1e-94	307.8	RPL14		K02875		aveNOG[1]	04PF2@aveNOG,09V5J@biNOG,0DGEN@chorNOG,0V656@meNOG,13U77@opiNOG,1CR45@veNOG,COG2163@NOG,KOG3421@euNOG	KOG3421|3.1e-75|257.9	J	ribosomal protein L14
g_428	9031.ENSGALP00000018777	5.2e-121	393.7	GGCT		K00682		aveNOG[1]	04MJY@aveNOG,0A2UI@biNOG,0DQ8U@chorNOG,0VDQ5@meNOG,11IGG@NOG,13PHW@opiNOG,1CZAK@veNOG,KOG4059@euNOG	KOG4059|2.8e-70|239.7	S	Gamma-glutamylcyclotransferase
g_433	9544.ENSMMUP00000016463	7.7e-28	88.7					aveNOG[1]	0A6RQ@biNOG,0DTR8@chorNOG,0IVXX@euNOG,0UV3G@maNOG,0VHJP@meNOG,11H1K@NOG,13QSQ@opiNOG,16I0R@prNOG,1B5MN@spriNOG,1D335@veNOG	0IVXX|7.4e-18|68.6	S	chromosome 7 open reading frame 41
g_434	9913.ENSBTAP00000025560	7.9e-21	68.4					aveNOG[1]	09X70@biNOG,0DIIF@chorNOG,0UINB@maNOG,0VC8M@meNOG,11KQJ@NOG,13SF1@opiNOG,1CT92@veNOG,KOG4795@euNOG	KOG4795|8.1e-09|39.4	K	ELL associated factor
g_436	9103.ENSMGAP00000018732	1.2e-176	579.5	SH3BP5	GO:0001932,GO:0001933,GO:0003674,GO:0004857,GO:0004860,GO:0005488,GO:0005515,GO:0005575,GO:0005622,GO:0005623,GO:0005737,GO:0005739,GO:0006469,GO:0007154,GO:0007165,GO:0008150,GO:0008432,GO:0009892,GO:0009987,GO:0010563,GO:0010605,GO:0019207,GO:0019210,GO:0019220,GO:0019222,GO:0019887,GO:0019899,GO:0019900,GO:0019901,GO:0023052,GO:0030234,GO:0031323,GO:0031324,GO:0031399,GO:0031400,GO:0032268,GO:…			aveNOG[1]	04J7Y@aveNOG,09X27@biNOG,0DICX@chorNOG,0V80F@meNOG,0ZK48@NOG,13KXD@opiNOG,1CT3D@veNOG,KOG2008@euNOG	KOG2008|8.2e-56|193.9	T	SH3-domain binding protein 5 (BTK-associated)
g_438	9258.ENSOANP00000010793	0	1133.8					aveNOG[1]	09T6S@biNOG,0DEHW@chorNOG,0UFGC@maNOG,0V45H@meNOG,0XPDN@NOG,12Q7K@opiNOG,1CP7P@veNOG,KOG1240@euNOG	0UFGC|0.0|1297.4	T	phosphoinositide-3-kinase, regulatory subunit 4
g_441	59729.ENSTGUP00000004303	3.9e-183	602.1	ASTE1				aveNOG[1]	04M2Y@aveNOG,09TR3@biNOG,0DF1C@chorNOG,0IFPJ@euNOG,0V4QC@meNOG,11F5P@NOG,12R54@opiNOG,1CPR6@veNOG	0IFPJ|9.5e-130|438.0	S	asteroid homolog 1 (Drosophila)
g_442	9031.ENSGALP00000018917	7e-107	342.7	MRPL3		K02906		aveNOG[1]	04HMN@aveNOG,0A01R@biNOG,0DI43@chorNOG,0V8CP@meNOG,12SH1@opiNOG,1CWGV@veNOG,COG0087@NOG,KOG3141@euNOG	04HMN|9.5e-80|271.8	J	ribosomal protein L3
g_443	30611.ENSOGAP00000021599	2.4e-46	149.7					aveNOG[1]	09T4Y@biNOG,0DEG5@chorNOG,0UN77@maNOG,0V43Q@meNOG,0XPC8@NOG,12Q7Z@opiNOG,16FUR@prNOG,1AVJI@spriNOG,1CX4E@veNOG,KOG1327@euNOG,KOG4307@euNOG	KOG4307|6e-51|177.2	S	RNA binding motif protein
g_448	9031.ENSGALP00000019110	3.6e-157	514.1	UBA5	GO:0003674,GO:0003824,GO:0005575,GO:0005622,GO:0005623,GO:0005634,GO:0005737,GO:0006464,GO:0008150,GO:0008152,GO:0008641,GO:0009987,GO:0019538,GO:0032446,GO:0036211,GO:0043170,GO:0043226,GO:0043227,GO:0043229,GO:0043231,GO:0043412,GO:0044237,GO:0044238,GO:0044260,GO:0044267,GO:0044424,GO:0044464,GO:0070647,GO:0071566,GO:0071569,GO:0071704	K12164		aveNOG[1]	04HGD@aveNOG,09W1Q@biNOG,0DHAR@chorNOG,0V6ZZ@meNOG,12SXS@opiNOG,1CS0V@veNOG,COG0476@NOG,KOG2336@euNOG	KOG2336|3.3e-123|415.9	O	Ubiquitin-like modifier activating enzyme 5
g_452	9103.ENSMGAP00000012106	1.1e-276	908.8	TMEM108				aveNOG[1]	04IFA@aveNOG,0A120@biNOG,0DRC8@chorNOG,0IEMG@euNOG,0VED4@meNOG,0YCMK@NOG,13PM4@opiNOG,1CRMB@veNOG	0IEMG|1.9e-189|635.4	S	Transmembrane protein 108
g_453	9031.ENSGALP00000019116	2.2e-250	821.7	BFSP2		K10379		aveNOG[1]	04J08@aveNOG,09WBK@biNOG,0DHKW@chorNOG,0IHF9@euNOG,0V79V@meNOG,0XQY0@NOG,12TS0@opiNOG,1CSBB@veNOG	0IHF9|4.9e-224|747.6	Z	beaded filament structural protein 2, phakinin
g_456	9031.ENSGALP00000019143	6.7e-230	753.1			K04183		aveNOG[1]	04MVP@aveNOG,0A1P0@biNOG,0DKEV@chorNOG,0IJ9D@euNOG,0VCIT@meNOG,0YUBT@NOG,13HCG@opiNOG,1CV8W@veNOG	0IJ9D|1.2e-156|524.9	T	Chemokine C-C motif receptor 8
g_460	9031.ENSGALP00000019246	3.7e-248	809.5	CCR9		K04184		aveNOG[1]	04GBC@aveNOG,09YSG@biNOG,0DK73@chorNOG,0V9QD@meNOG,0XRW9@NOG,12T81@opiNOG,1CV0Y@veNOG,KOG3656@euNOG	04GBC|6.3e-246|819.2	T	chemokine (C-C motif) receptor 9
g_462	9103.ENSMGAP00000012139	0	1296.2			K05048		aveNOG[1]	04MJC@aveNOG,09TC8@biNOG,0DJG7@chorNOG,0V4BE@meNOG,12NMW@opiNOG,1CVDH@veNOG,COG0733@NOG,KOG3659@euNOG	04MJC|0.0|1383.9	P	Sodium:neurotransmitter symporter family
g_465	28377.ENSACAP00000001417	5.1e-113	373.4					aveNOG[1]	09TU6@biNOG,0DF5J@chorNOG,0V4TG@meNOG,0Y3GP@NOG,12NDJ@opiNOG,1CPV7@veNOG,KOG1701@euNOG	KOG1701|8e-31|111.2	T	Lim protein
g_467	9823.ENSSSCP00000027131	2.6e-108	351.2					aveNOG[1]	0A5P6@biNOG,0DMFA@chorNOG,0IXR9@euNOG,0UU9M@maNOG,0VGI9@meNOG,0YHSY@NOG,13RTW@opiNOG,1D1HV@veNOG	0IXR9|1.3e-119|403.1	U	transmembrane protein 158
g_469	9258.ENSOANP00000010855	1e-104	337.6					aveNOG[1]	0A322@biNOG,0DQIE@chorNOG,0UGSN@maNOG,0VD84@meNOG,0XPJ1@NOG,13PCW@opiNOG,1CZKS@veNOG,KOG4297@euNOG	0UGSN|1.7e-106|357.8	T, V	C-type lectin domain family 3, member B
g_471	7955.ENSDARP00000025104	1.6e-20	65.8					aveNOG[1]	09U1N@biNOG,0DFBC@chorNOG,0MZRK@fiNOG,0V50H@meNOG,12PCS@opiNOG,1CVA6@veNOG,COG5273@NOG,KOG1311@euNOG	1CVA6|5.4e-13|52.5	S	Zinc finger, DHHC-type containing
g_472	9031.ENSGALP00000019372	0	1537.8	TGM4		K05621		aveNOG[1]	04I7H@aveNOG,09U5T@biNOG,0DFFC@chorNOG,0IFMV@euNOG,0V54T@meNOG,0XQEZ@NOG,12WTW@opiNOG,1D1R7@veNOG	0IFMV|9e-274|914.4	O	transglutaminase
g_473	13735.ENSPSIP00000011991	1.8e-39	126.5					aveNOG[1]	0A6NC@biNOG,0DTWS@chorNOG,0IWPB@euNOG,0VHSV@meNOG,0XXKU@NOG,13QGE@opiNOG,1D38W@veNOG	0IWPB|2.9e-38|135.0	S	Transmembrane protein 42
g_474	9031.ENSGALP00000019400	4.3e-56	179.5	KIAA1143				aveNOG[1]	04KB6@aveNOG,0A52T@biNOG,0DSH0@chorNOG,0J2M5@euNOG,0VAUZ@meNOG,1289D@NOG,13WB8@opiNOG,1CSDX@veNOG	0J2M5|3.7e-37|131.6	S	kiaa1143
g_479	9031.ENSGALP00000019447	8.9e-191	625.8	TRAK1				aveNOG[1]	04MP1@aveNOG,09Z6Q@biNOG,0DIW9@chorNOG,0VA40@meNOG,0XSWD@NOG,12S7C@opiNOG,1CVH4@veNOG,KOG4360@euNOG	KOG4360|3.6e-64|221.0	U	Trafficking protein, kinesin binding
g_480	9103.ENSMGAP00000012293	2.6e-87	280.9	CCK	GO:0000902,GO:0000904,GO:0001764,GO:0003674,GO:0005102,GO:0005179,GO:0005488,GO:0005515,GO:0005575,GO:0005576,GO:0005623,GO:0006928,GO:0007275,GO:0007399,GO:0007409,GO:0007586,GO:0008150,GO:0009653,GO:0009987,GO:0016043,GO:0016477,GO:0022008,GO:0030030,GO:0030154,GO:0030182,GO:0030424,GO:0031175,GO:0032501,GO:0032502,GO:0032989,GO:0032990,GO:0040011,GO:0042995,GO:0043005,GO:0044464,GO:0044699,GO:…	K05226		aveNOG[1]	04PEZ@aveNOG,0A7JI@biNOG,0DUHC@chorNOG,0IXQ9@euNOG,0VIK1@meNOG,1211F@NOG,13RFS@opiNOG,1D3V0@veNOG	0IXQ9|9.1e-55|188.6	T	Cholecystokinin
g_484	59729.ENSTGUP00000001353	2.3e-20	60.1					aveNOG[1]	04GDA@aveNOG,0A1KH@biNOG,0DP8P@chorNOG,0VCG4@meNOG,0XQZR@NOG,12TVD@opiNOG,1CPRM@veNOG,KOG4430@euNOG	04GDA|9.8e-16|60.8	O	Inherit from veNOG: topoisomerase I binding, arginine serine-rich, E3 ubiquitin protein ligase
g_485	9103.ENSMGAP00000012311	3.2e-110	357.2	MYRIP				aveNOG[1]	04GGT@aveNOG,0A248@biNOG,0DPS8@chorNOG,0IHBX@euNOG,0VCZQ@meNOG,126RD@NOG,13KEJ@opiNOG,1CYRC@veNOG	0IHBX|3.7e-90|307.3	Z	Myosin VIIA and Rab interacting protein
g_486	59729.ENSTGUP00000001353	1e-20	61.2					aveNOG[1]	04GDA@aveNOG,0A1KH@biNOG,0DP8P@chorNOG,0VCG4@meNOG,0XQZR@NOG,12TVD@opiNOG,1CPRM@veNOG,KOG4430@euNOG	04GDA|4.7e-16|61.9	O	Inherit from veNOG: topoisomerase I binding, arginine serine-rich, E3 ubiquitin protein ligase
g_489	9103.ENSMGAP00000012320	5.8e-255	838.4	TMC2				aveNOG[1]	04FH9@aveNOG,0A094@biNOG,0DMVW@chorNOG,0IF2J@euNOG,0VB54@meNOG,0XTGF@NOG,12QSW@opiNOG,1CWIS@veNOG	0IF2J|1.2e-187|630.1	U	Transmembrane channel-like
g_490	9031.ENSGALP00000019469	6.8e-205	673.5		GO:0000028,GO:0000447,GO:0000460,GO:0000461,GO:0000462,GO:0000466,GO:0000469,GO:0000478,GO:0000479,GO:0003674,GO:0003735,GO:0005198,GO:0005488,GO:0005515,GO:0005575,GO:0005622,GO:0005623,GO:0005634,GO:0005737,GO:0005829,GO:0005840,GO:0005886,GO:0006139,GO:0006364,GO:0006396,GO:0006403,GO:0006405,GO:0006407,GO:0006412,GO:0006725,GO:0006807,GO:0006810,GO:0006913,GO:0006996,GO:0008150,GO:0008152,GO:…	K02998		aveNOG[1]	04GVP@aveNOG,09WB7@biNOG,0DHKH@chorNOG,0V79H@meNOG,12QB0@opiNOG,1CSAX@veNOG,COG0052@NOG,KOG0830@euNOG	KOG0830|6.6e-159|534.2	J	Required for the assembly and or stability of the 40S ribosomal subunit. Required for the processing of the 20S rRNA- precursor to mature 18S rRNA in a late step of the maturation of 40S ribosomal subunits
g_491	9031.ENSGALP00000019470	1.4e-113	372.6	SLC25A38		K15118		aveNOG[1]	04KW0@aveNOG,0A3F1@biNOG,0DR26@chorNOG,0VE9W@meNOG,0XRMK@NOG,12PRX@opiNOG,1D06Z@veNOG,KOG0766@euNOG	KOG0766|1.7e-56|195.5	C	solute carrier family 25, member 38
g_492	9103.ENSMGAP00000012344	7.1e-239	783.3	CCR8		K04183		aveNOG[1]	04EK2@aveNOG,0A1P0@biNOG,0DKEV@chorNOG,0IJ9D@euNOG,0VCIT@meNOG,0YUBT@NOG,13HCG@opiNOG,1CV8W@veNOG	0IJ9D|2e-159|534.1	T	Chemokine C-C motif receptor 8
g_495	9031.ENSGALP00000019505	3.2e-101	327.8	CRTAP	GO:0005575,GO:0005576,GO:0005578,GO:0031012,GO:0044421	K19606		aveNOG[1]	04QVZ@aveNOG,0B4UU@biNOG,0E8HV@chorNOG,0IQZH@euNOG,0WHDK@meNOG,0Y7XP@NOG,13DPM@opiNOG,1DFFZ@veNOG	0IQZH|1.3e-58|203.1	O	Cartilage associated protein
g_502	69293.ENSGACP00000007250	2.1e-30	93.4					aveNOG[1]	0B321@biNOG,0E7F2@chorNOG,0IMFW@euNOG,0NBYT@fiNOG,0WFDG@meNOG,0ZDWD@NOG,13ARZ@opiNOG,1DEG0@veNOG	0IMFW|6.8e-25|91.7	S	NA
g_505	9739.ENSTTRP00000003424	1e-32	103.8					aveNOG[1]	09XM2@biNOG,0DIYI@chorNOG,0UMA7@maNOG,0V8IS@meNOG,0XQX6@NOG,12RA9@opiNOG,1CTPY@veNOG,KOG2220@euNOG	0UMA7|2.4e-37|132.5	S	Programmed cell death 6 interacting protein
g_516	9031.ENSGALP00000019676	1.3e-128	419.8	MLH1		K08734		aveNOG[1]	04GIS@aveNOG,09ZY6@biNOG,0DMHC@chorNOG,0VAUV@meNOG,12S6G@opiNOG,1CWCM@veNOG,COG0323@NOG,KOG1979@euNOG	KOG1979|4.4e-121|409.4	L	DNA mismatch repair protein
g_519	9031.ENSGALP00000019690	3e-47	149.9	EPDR1				aveNOG[1]	04PCA@aveNOG,0A28N@biNOG,0DPWJ@chorNOG,0IIY9@euNOG,0VD4H@meNOG,12CW8@NOG,13D3W@opiNOG,1CYW2@veNOG	0IIY9|7.2e-18|69.3	S	Ependymin related protein 1 (Zebrafish)
g_521	9031.ENSGALP00000036723	2.3e-168	547	SFRP4				aveNOG[1]	04GZF@aveNOG,09Y9P@biNOG,0DJP3@chorNOG,0V8JF@meNOG,0XRC8@NOG,12Q4Y@opiNOG,1CUG3@veNOG,KOG3577@euNOG	04GZF|3.6e-172|576.2	T	secreted frizzled-related protein 4
g_531	9031.ENSGALP00000019756	2.7e-196	643.1	KIAA0895				aveNOG[1]	04GTC@aveNOG,09WX2@biNOG,0DIGN@chorNOG,0IGSS@euNOG,0V6PR@meNOG,0YKC2@NOG,12TD9@opiNOG,1CT77@veNOG	0IGSS|2e-152|513.3	S	KIAA0895-like
g_532	10116.ENSRNOP00000009342	4.8e-113	365.4					aveNOG[1]	0B0UW@biNOG,0E67P@chorNOG,0KDV5@euNOG,0V1JS@maNOG,0WDCG@meNOG,14U2D@opiNOG,196X9@roNOG,1BAB5@spriNOG,1DD6Y@veNOG,COG1555@NOG	0KDV5|9.7e-107|361.6	L	endonuclease exonuclease phosphatase family domain containing 1
g_533	10116.ENSRNOP00000009342	1.9e-163	531					aveNOG[1]	0B0UW@biNOG,0E67P@chorNOG,0KDV5@euNOG,0V1JS@maNOG,0WDCG@meNOG,14U2D@opiNOG,196X9@roNOG,1BAB5@spriNOG,1DD6Y@veNOG,COG1555@NOG	0KDV5|6.6e-174|583.3	L	endonuclease exonuclease phosphatase family domain containing 1
g_537	9031.ENSGALP00000019816	3.3e-31	99.7	HERPUD2				aveNOG[1]	04EKV@aveNOG,09UJK@biNOG,0DEVC@chorNOG,0V5IS@meNOG,0ZJAF@NOG,12SIW@opiNOG,1CPJ3@veNOG,KOG4583@euNOG	KOG4583|1.7e-22|84.4	O	homocysteine-inducible, endoplasmic reticulum stress-inducible, ubiquitin-like domain member 1
g_541	9031.ENSGALP00000019818	6.1e-198	650.3	TBX20	GO:0005575,GO:0005622,GO:0005623,GO:0005634,GO:0043226,GO:0043227,GO:0043229,GO:0043231,GO:0044424,GO:0044464	K10185		aveNOG[1]	04NGB@aveNOG,0A1QP@biNOG,0DPCN@chorNOG,0VB45@meNOG,0Y98J@NOG,12TZ3@opiNOG,1CYAJ@veNOG,KOG3586@euNOG	KOG3586|1.6e-141|475.8	K	t-box transcription factor
g_544	9031.ENSGALP00000036693	3e-91	294.2					aveNOG[1]	0A11K@biNOG,0DNPD@chorNOG,0IIPW@euNOG,0V6XG@meNOG,11RHB@NOG,13PGS@opiNOG,1CXKN@veNOG	0IIPW|2.1e-53|184.8	S	Fancd2 opposite strand
g_549	59729.ENSTGUP00000014551	1.7e-208	687.2					aveNOG[1]	0A8H2@biNOG,0VJDF@meNOG,13V3H@opiNOG,COG0545@NOG,KOG0549@euNOG	13V3H|2.6e-170|570.3	O	Peptidyl-prolyl cis-trans isomerase
g_551	10020.ENSDORP00000002420	5.2e-86	274.9					aveNOG[1]	0B0SD@biNOG,0E65K@chorNOG,0KDSA@euNOG,0V1I0@maNOG,0WD9R@meNOG,11TFK@NOG,14TZH@opiNOG,1DD4V@veNOG	0KDSA|7.8e-87|294.1	K	Retinitis pigmentosa 9
g_559	9031.ENSGALP00000019951	3.9e-236	773.2	NEUROD6	GO:0005575,GO:0005622,GO:0005623,GO:0005634,GO:0043226,GO:0043227,GO:0043229,GO:0043231,GO:0044424,GO:0044464	K09080		aveNOG[1]	04QTY@aveNOG,0B4EF@biNOG,0E89H@chorNOG,0IQ4G@euNOG,0WGXC@meNOG,118Y2@NOG,13D0X@opiNOG,1DF89@veNOG	0IQ4G|4.4e-210|700.5	K	Neurogenic differentiation factor
g_560	9031.ENSGALP00000019958	2.8e-34	108.2	ITGA9	GO:0005575,GO:0016020	K06585		aveNOG[1]	04QRZ@aveNOG,0B3YB@biNOG,0E7ZT@chorNOG,0IPAY@euNOG,0WGDD@meNOG,0XQBM@NOG,13CAP@opiNOG,1DEZ8@veNOG	0IPAY|4.4e-15|58.4	W	Integrin, alpha 9
g_564	9258.ENSOANP00000027045	1.4e-24	77.1					aveNOG[1]	0AAH1@biNOG,0DW7P@chorNOG,0J7SJ@euNOG,0UWQB@maNOG,0VMF7@meNOG,0Z9YC@NOG,13ZAA@opiNOG,1D5HC@veNOG	0J7SJ|4.7e-28|101.2	S	T cell receptor gamma variable
g_567	9258.ENSOANP00000027045	1.4e-22	70.5					aveNOG[1]	0AAH1@biNOG,0DW7P@chorNOG,0J7SJ@euNOG,0UWQB@maNOG,0VMF7@meNOG,0Z9YC@NOG,13ZAA@opiNOG,1D5HC@veNOG	0J7SJ|8.7e-27|97.1	S	T cell receptor gamma variable
g_578	9031.ENSGALP00000036649	1.3e-61	198.9					aveNOG[1]	04PYP@aveNOG,0A6NH@biNOG,0DTN6@chorNOG,0J0XS@euNOG,0VHGM@meNOG,11V2F@NOG,13U9A@opiNOG,1D2ZT@veNOG	0J0XS|3e-18|71.0	O	M-phase specific PLK1 interacting protein
g_579	13735.ENSPSIP00000020037	2.7e-24	80.3					aveNOG[1]	09W98@biNOG,0DIB4@chorNOG,0V7YS@meNOG,12PHB@opiNOG,1CT1J@veNOG,COG1804@NOG,KOG3957@euNOG	KOG3957|2e-16|63.2	I	caib baif family
g_580	9103.ENSMGAP00000012906	2e-298	976.4	INHBA	GO:0000003,GO:0000082,GO:0000278,GO:0001541,GO:0001553,GO:0001558,GO:0001942,GO:0002244,GO:0002376,GO:0002520,GO:0002682,GO:0003001,GO:0003006,GO:0003008,GO:0003674,GO:0005102,GO:0005125,GO:0005488,GO:0005515,GO:0005575,GO:0005576,GO:0005615,GO:0006355,GO:0006357,GO:0006810,GO:0006869,GO:0006915,GO:0006917,GO:0007049,GO:0007050,GO:0007154,GO:0007267,GO:0007275,GO:0007498,GO:0007548,GO:0008150,GO:…	K04667		aveNOG[1]	04EVM@aveNOG,09WPX@biNOG,0DHZK@chorNOG,0V7ND@meNOG,0XT8Z@NOG,13QY5@opiNOG,1CSQ8@veNOG,KOG3900@euNOG	04EVM|0.0|1026.1	T	inhibin beta A
g_587	59729.ENSTGUP00000017898	2.2e-21	66.1					aveNOG[1]	0A7Y3@biNOG,0DUNI@chorNOG,0VIT8@meNOG,12PBX@opiNOG,1D3XX@veNOG,COG2801@NOG,KOG0017@euNOG	0DUNI|6.8e-19|71.6	L	Inherit from opiNOG: to reverse transcriptase
g_588	13735.ENSPSIP00000001037	5.4e-93	301.9					aveNOG[1]	0A7Y3@biNOG,0DUNI@chorNOG,0VIT8@meNOG,12PBX@opiNOG,1D3XX@veNOG,COG2801@NOG,KOG0017@euNOG	0DUNI|3.1e-106|360.0	L	Inherit from opiNOG: to reverse transcriptase
g_592	9031.ENSGALP00000020150	6.4e-33	100.3	STK17A		K08804		aveNOG[1]	04HJZ@aveNOG,09TQB@biNOG,0DF0M@chorNOG,0V4PJ@meNOG,0XRMJ@NOG,12TTU@opiNOG,1CPQD@veNOG,KOG0032@euNOG	04HJZ|6.5e-26|94.7	T	serine threonine kinase 17a
g_599	13616.ENSMODP00000038871	1.1e-66	217					aveNOG[1]	0A5PR@biNOG,0DS2U@chorNOG,0UXP4@maNOG,0VGZT@meNOG,13NMG@opiNOG,1D2KS@veNOG,COG2801@NOG,KOG0017@euNOG	0VGZT|7.7e-136|458.3	L	Inherit from KOG: Retrotransposon protein
g_600	9031.ENSGALP00000020165	0	1019.7	EGFR	GO:0000139,GO:0003674,GO:0003824,GO:0004672,GO:0004713,GO:0005575,GO:0005622,GO:0005623,GO:0005634,GO:0005635,GO:0005737,GO:0005768,GO:0005783,GO:0005789,GO:0005794,GO:0005886,GO:0006464,GO:0006468,GO:0006793,GO:0006796,GO:0008150,GO:0008152,GO:0009987,GO:0010008,GO:0012505,GO:0016020,GO:0016301,GO:0016310,GO:0016740,GO:0016772,GO:0016773,GO:0019538,GO:0031090,GO:0031965,GO:0031967,GO:0031975,GO:…			aveNOG[1]	04H3A@aveNOG,09VY3@biNOG,0DH6Q@chorNOG,0V6WJ@meNOG,0XNSR@NOG,12QPC@opiNOG,1CRHP@veNOG,KOG1025@euNOG	KOG1025|4e-162|545.6	T	erythroblastic leukemia viral oncogene homolog
g_602	9031.ENSGALP00000023403	5.5e-55	180.3	MFSD5				aveNOG[1]	04IKM@aveNOG,09Y0A@biNOG,0DJDC@chorNOG,0V631@meNOG,0XSP5@NOG,12SYS@opiNOG,1CU5M@veNOG,KOG4332@euNOG	KOG4332|3.2e-19|72.0	G	Major Facilitator superfamily
g_611	13735.ENSPSIP00000001037	2.4e-48	154.3					aveNOG[1]	0A7Y3@biNOG,0DUNI@chorNOG,0VIT8@meNOG,12PBX@opiNOG,1D3XX@veNOG,COG2801@NOG,KOG0017@euNOG	0DUNI|4.9e-54|187.7	L	Inherit from opiNOG: to reverse transcriptase
g_612	13616.ENSMODP00000038871	2.3e-65	212.6					aveNOG[1]	0A5PR@biNOG,0DS2U@chorNOG,0UXP4@maNOG,0VGZT@meNOG,13NMG@opiNOG,1D2KS@veNOG,COG2801@NOG,KOG0017@euNOG	0VGZT|2.2e-132|446.8	L	Inherit from KOG: Retrotransposon protein
g_617	9031.ENSGALP00000019604	1.2e-25	79.1					aveNOG[1]	0AGKR@biNOG,0DZJW@chorNOG,0KFM2@euNOG,0VTIU@meNOG,10T76@NOG,12YMX@opiNOG,1D821@veNOG	0KFM2|7.9e-19|71.7	S	NA
g_619	30611.ENSOGAP00000005018	1.2e-55	173.4					aveNOG[1]	09VPX@biNOG,0DI2H@chorNOG,0UJCR@maNOG,0V5DY@meNOG,0XPHG@NOG,12Q3Q@opiNOG,16EMM@prNOG,1AUM5@spriNOG,1CST1@veNOG,KOG3516@euNOG	16EMM|3.1e-63|217.8	T	4.1m
g_622	9031.ENSGALP00000020268	0	1386.7			K09582		aveNOG[1]	04G7N@aveNOG,09V4G@biNOG,0DGDJ@chorNOG,0V644@meNOG,12P44@opiNOG,1CR33@veNOG,COG0526@NOG,KOG0190@euNOG	KOG0190|3.5e-160|538.9	O	Protein disulfide isomerase
g_625	7897.ENSLACP00000012017	2.1e-106	342.3					aveNOG[1]	0AZSC@biNOG,0E5AK@chorNOG,0KCR1@euNOG,0WC8N@meNOG,11GKV@NOG,14SWP@opiNOG,1DCAK@veNOG	0KCR1|1.1e-112|378.5	S	NA
g_626	13735.ENSPSIP00000001037	6.1e-108	351.6					aveNOG[1]	0A7Y3@biNOG,0DUNI@chorNOG,0VIT8@meNOG,12PBX@opiNOG,1D3XX@veNOG,COG2801@NOG,KOG0017@euNOG	0DUNI|1.8e-122|413.6	L	Inherit from opiNOG: to reverse transcriptase
g_627	9031.ENSGALP00000020307	1.4e-151	495.8	IGFBP1				aveNOG[1]	04GHE@aveNOG,0A16I@biNOG,0DNU7@chorNOG,0IITJ@euNOG,0VC2D@meNOG,11H9A@NOG,13MNZ@opiNOG,1CXRI@veNOG	0IITJ|2.7e-83|283.3	T	Insulin-like growth factor binding protein 1
g_628	9031.ENSGALP00000020311	9.1e-69	222.1	IGFBP3				aveNOG[1]	04FJ5@aveNOG,09ZHE@biNOG,0DM0D@chorNOG,0IHZU@euNOG,0VAEQ@meNOG,11MF3@NOG,12V3E@opiNOG,1CVV8@veNOG	0IHZU|8.1e-50|173.7	T	Insulin-like growth factor binding protein 3
g_637	9031.ENSGALP00000020415	5.7e-87	285.6	BRD9				aveNOG[1]	04K31@aveNOG,0A0IH@biNOG,0DFJP@chorNOG,0V86X@meNOG,0XRRI@NOG,12SWD@opiNOG,1CQ9E@veNOG,KOG1828@euNOG	KOG1828|2.2e-08|37.4	K	bromodomain containing
g_640	9031.ENSGALP00000019604	4.8e-33	103.1					aveNOG[1]	0AGKR@biNOG,0DZJW@chorNOG,0KFM2@euNOG,0VTIU@meNOG,10T76@NOG,12YMX@opiNOG,1D821@veNOG	0KFM2|2.1e-23|86.8	S	NA
g_645	9031.ENSGALP00000020596	1.1e-66	214.2					aveNOG[1]	04I4W@aveNOG,0A3V4@biNOG,0DQRS@chorNOG,0VEPJ@meNOG,11QCT@NOG,13P00@opiNOG,1CXD3@veNOG,KOG4700@euNOG	KOG4700|5.4e-26|95.5	U	Ribosome binding factor A
g_647	13735.ENSPSIP00000013588	5.4e-41	132.1					aveNOG[1]	09U73@biNOG,0DFGS@chorNOG,0IE6A@euNOG,0V567@meNOG,0XPAP@NOG,139M9@opiNOG,1CQ6G@veNOG	0IE6A|1.2e-39|140.5	S	coiled-coil domain containing 81
g_648	9031.ENSGALP00000020615	2.1e-44	143.8	PQLC1				aveNOG[1]	04JE9@aveNOG,09WXS@biNOG,0DI8D@chorNOG,0V7W1@meNOG,11FM2@NOG,13K39@opiNOG,1CSYU@veNOG,KOG2913@euNOG	KOG2913|1e-11|47.6	J	PQ loop repeat
g_649	9031.ENSGALP00000020617	6.9e-177	582	KCNG2	GO:0003674,GO:0005215,GO:0005216,GO:0005244,GO:0005249,GO:0005251,GO:0005261,GO:0005267,GO:0005575,GO:0006810,GO:0006811,GO:0006812,GO:0006813,GO:0008150,GO:0008324,GO:0009987,GO:0015075,GO:0015077,GO:0015079,GO:0015267,GO:0015672,GO:0016020,GO:0022803,GO:0022832,GO:0022836,GO:0022838,GO:0022839,GO:0022843,GO:0022857,GO:0022890,GO:0022891,GO:0022892,GO:0030001,GO:0032879,GO:0034220,GO:0034762,GO:…	K04901		aveNOG[1]	04JCV@aveNOG,0A1MT@biNOG,0DPA1@chorNOG,0VCHJ@meNOG,13KSG@opiNOG,1CY81@veNOG,COG1226@NOG,KOG3713@euNOG	KOG3713|3.9e-86|293.6	P	PotAssium voltage-gated channel
g_653	13735.ENSPSIP00000001037	1.4e-113	370					aveNOG[1]	0A7Y3@biNOG,0DUNI@chorNOG,0VIT8@meNOG,12PBX@opiNOG,1D3XX@veNOG,COG2801@NOG,KOG0017@euNOG	0DUNI|2.1e-121|410.1	L	Inherit from opiNOG: to reverse transcriptase
g_660	28377.ENSACAP00000014114	8.3e-182	593.6					aveNOG[1]	0B0T6@biNOG,0E66A@chorNOG,0KDT3@euNOG,0WDAK@meNOG,14U0E@opiNOG,1DD5K@veNOG,COG5048@NOG	0KDT3|7.8e-144|485.0	K	Zinc finger, C2H2 type
g_671	9031.ENSGALP00000020641	1.9e-245	808.5	ALDH5A1				aveNOG[1]	04G1J@aveNOG,09W8H@biNOG,0DHHR@chorNOG,0V76X@meNOG,12TRX@opiNOG,1CS7Z@veNOG,COG1012@NOG,KOG2451@euNOG	KOG2451|8.5e-178|597.5	C	Dehydrogenase
g_672	10090.ENSMUSP00000021772	3e-38	120.9					aveNOG[1]	0B5KI@biNOG,0E8ZP@chorNOG,0IS94@euNOG,0WI85@meNOG,0XRIZ@NOG,13EWB@opiNOG,1DFVX@veNOG	0IS94|1.4e-15|60.9	P	Mitochondrial inner membrane magnesium transporter required for mitochondrial magnesium homeostasis. Modulates the conductance of the MRS2 channel. Involved in the splicing of mRNA group II introns in mitochondria by affecting mitochondrial magnesium concentrations, which are critical for group II intron splicing
g_674	9103.ENSMGAP00000002045	1.7e-74	241					aveNOG[1]	04K8X@aveNOG,09X6P@biNOG,0DII4@chorNOG,0V85B@meNOG,0ZE6Q@NOG,12RX2@opiNOG,1CT8Q@veNOG,KOG3757@euNOG	KOG3757|7.3e-37|130.9	D, Z	Doublecortin domain containing
g_679	13735.ENSPSIP00000001037	2.6e-106	346.4					aveNOG[1]	0A7Y3@biNOG,0DUNI@chorNOG,0VIT8@meNOG,12PBX@opiNOG,1D3XX@veNOG,COG2801@NOG,KOG0017@euNOG	0DUNI|1e-121|411.1	L	Inherit from opiNOG: to reverse transcriptase
g_683	9606.ENSP00000244745	2.2e-161	527.9					aveNOG[1]	0B4C1@biNOG,0E87R@chorNOG,0IPZ6@euNOG,0V33H@maNOG,0WGUQ@meNOG,11U1K@NOG,13CWW@opiNOG,16NQD@prNOG,1BAYU@spriNOG,1DF6J@veNOG	0IPZ6|7.2e-109|369.2	K	SRY (sex determining region Y)-box
g_687	9315.ENSMEUP00000000694	1.9e-31	101.3					aveNOG[1]	0A1KH@biNOG,0DP8P@chorNOG,0UT5Q@maNOG,0VCG4@meNOG,0XQZR@NOG,12TVD@opiNOG,1CPRM@veNOG,KOG4430@euNOG	0DP8P|5.5e-28|101.6	O	topoisomerase I binding, arginine serine-rich, E3 ubiquitin protein ligase
g_688	9315.ENSMEUP00000000694	1.6e-34	111.4					aveNOG[1]	0A1KH@biNOG,0DP8P@chorNOG,0UT5Q@maNOG,0VCG4@meNOG,0XQZR@NOG,12TVD@opiNOG,1CPRM@veNOG,KOG4430@euNOG	0DP8P|6e-32|114.7	O	topoisomerase I binding, arginine serine-rich, E3 ubiquitin protein ligase
g_691	9031.ENSGALP00000022969	5.8e-133	434.1	RIBC2				aveNOG[1]	04MMV@aveNOG,09TII@biNOG,0DEV5@chorNOG,0IE6I@euNOG,0V4HH@meNOG,0YKAG@NOG,12U39@opiNOG,1D0HA@veNOG	0IE6I|1.8e-86|294.1	S	RIB43A domain with coiled-coils
g_694	572307.XP_003881784.1	1.4e-56	185.9					aveNOG[1]	0XT5U@NOG,COG0526@NOG,KOG0190@euNOG,KOG0191@euNOG,KOG2458@euNOG	KOG0190|8.3e-18|66.5	O	Protein disulfide isomerase
g_697	9315.ENSMEUP00000000694	7.8e-35	112.4					aveNOG[1]	0A1KH@biNOG,0DP8P@chorNOG,0UT5Q@maNOG,0VCG4@meNOG,0XQZR@NOG,12TVD@opiNOG,1CPRM@veNOG,KOG4430@euNOG	0DP8P|1.5e-33|120.1	O	topoisomerase I binding, arginine serine-rich, E3 ubiquitin protein ligase
g_708	9103.ENSMGAP00000014636	1.7e-260	853.7					aveNOG[1]	0B03U@biNOG,0E5KD@chorNOG,0KD2Y@euNOG,0WCKD@meNOG,0XR4U@NOG,14T96@opiNOG,1DCKB@veNOG	1DCKB|1e-203|683.1	P, T	PLAT/LH2 domain
g_710	9031.ENSGALP00000022512	1e-57	185.4					aveNOG[1]	04FZQ@aveNOG,09VC4@biNOG,0DGKK@chorNOG,0IEI4@euNOG,0V6BA@meNOG,0ZFB8@NOG,12P7S@opiNOG,1CRAF@veNOG	0IEI4|3.3e-26|95.7	S	poly (ADP-ribose) polymerase family, member 12
g_713	9478.ENSTSYP00000008228	0	1765.7					aveNOG[1]	09VU7@biNOG,0DJJI@chorNOG,0UGG9@maNOG,0V6SX@meNOG,0XP34@NOG,12PH9@opiNOG,1AS8K@spriNOG,1CXGI@veNOG,KOG1215@euNOG	0UGG9|0.0|1509.9	T	Low density lipoprotein receptor-related protein 6
g_715	59729.ENSTGUP00000013085	7.2e-39	126.3	LOH12CR1				aveNOG[1]	04FR0@aveNOG,0A3EG@biNOG,0DR1S@chorNOG,0VE96@meNOG,0YDKQ@NOG,13K1P@opiNOG,1D066@veNOG,KOG4515@euNOG	KOG4515|3.4e-15|59.9	S	Loss of heterozygosity, 12, chromosomal region 1
g_716	9103.ENSMGAP00000016944	5.3e-47	148.5					aveNOG[1]	0YDKQ@NOG,KOG4515@euNOG	KOG4515|4.8e-31|111.9	S	Loss of heterozygosity, 12, chromosomal region 1
g_717	9103.ENSMGAP00000014657	0	1072.5	DUSP16		K04459		aveNOG[1]	04ITY@aveNOG,09WEM@biNOG,0DHPX@chorNOG,0V7D4@meNOG,13117@opiNOG,1CSEB@veNOG,COG2453@NOG,KOG1716@euNOG	04ITY|0.0|1099.6	V	dual specificity phosphatase 16
g_722	9103.ENSMGAP00000014659	1.2e-71	232.2					aveNOG[1]	04QJ4@aveNOG,0A6NZ@biNOG,0DTNN@chorNOG,0VHH2@meNOG,0XXN5@NOG,13Q29@opiNOG,1D30F@veNOG,KOG4743@euNOG	KOG4743|2.3e-28|103.1	T	cyclin-dependent kinase inhibitor
g_725	59729.ENSTGUP00000013074	2.6e-120	393			K06624		aveNOG[1]	04FV1@aveNOG,0A02A@biNOG,0DMMW@chorNOG,0VAYP@meNOG,0XXN5@NOG,13IFC@opiNOG,1CWHH@veNOG,KOG4743@euNOG	KOG4743|9.8e-41|143.3	T	cyclin-dependent kinase inhibitor
g_730	59729.ENSTGUP00000003598	3e-273	893.8	MEF2D	GO:0005575,GO:0005622,GO:0005623,GO:0005634,GO:0043226,GO:0043227,GO:0043229,GO:0043231,GO:0044424,GO:0044464			aveNOG[1]	04KG5@aveNOG,0A1FY@biNOG,0DP3H@chorNOG,0VB2M@meNOG,12SAZ@opiNOG,1CY1H@veNOG,COG5068@NOG,KOG0014@euNOG	04KG5|1e-296|988.1	K	myocyte enhancer factor 2D
g_731	9031.ENSGALP00000000599	1.3e-95	314.8					aveNOG[1]	0A191@biNOG,0DNWU@chorNOG,0VC4U@meNOG,0YM6S@NOG,13KAX@opiNOG,1CQI3@veNOG,KOG2687@euNOG	KOG2687|1.7e-56|196.0	D	Sad1 and UNC84 domain containing
g_735	9103.ENSMGAP00000000037	0	1783.9	OTUD7B				aveNOG[1]	04KR9@aveNOG,09YZ1@biNOG,0DF42@chorNOG,0V9WP@meNOG,0XT8E@NOG,12PUT@opiNOG,1CPTX@veNOG,KOG4345@euNOG	KOG4345|1.1e-199|669.8	T	OTU domain containing
g_736	13616.ENSMODP00000023399	6e-176	582.2					aveNOG[1]	09TYK@biNOG,0DF8P@chorNOG,0UPTB@maNOG,0V4XH@meNOG,0XPTU@NOG,13H6X@opiNOG,1CPYA@veNOG,KOG1089@euNOG	KOG1089|2.4e-95|324.4	S	Myotubularin related protein
g_737	9103.ENSMGAP00000000027	1.6e-278	911.2					aveNOG[1]	04GK8@aveNOG,0A0NX@biNOG,0DNA9@chorNOG,0VBJ4@meNOG,0XPT4@NOG,12T00@opiNOG,1CX74@veNOG,KOG0131@euNOG	04GK8|4.8e-281|935.9	A	RNA recognition motif. (a.k.a. RRM, RBD, or RNP domain)
g_738	9669.ENSMPUP00000005536	0	1464.4					aveNOG[1]	0B55P@biNOG,0E8R3@chorNOG,0IRID@euNOG,0V3E1@maNOG,0WHRT@meNOG,0YQME@NOG,13E7P@opiNOG,1DFN7@veNOG	0V3E1|0.0|1531.4	U	Synaptic vesicle glycoprotein 2A
g_739	9685.ENSFCAP00000019687	4.5e-30	96.7					aveNOG[1]	09U73@biNOG,0CGUH@carNOG,0DFGS@chorNOG,0IE6A@euNOG,0UGTP@maNOG,0V567@meNOG,0XPAP@NOG,139M9@opiNOG,1CQ6G@veNOG	0IE6A|1.6e-33|120.3	S	coiled-coil domain containing 81
g_741	9483.ENSCJAP00000022249	1.4e-29	95					aveNOG[1]	09U73@biNOG,0DFGS@chorNOG,0IE6A@euNOG,0UGTP@maNOG,0V567@meNOG,0XPAP@NOG,139M9@opiNOG,16607@prNOG,1B064@spriNOG,1CQ6G@veNOG	0IE6A|2.6e-33|119.6	S	coiled-coil domain containing 81
g_742	9103.ENSMGAP00000015507	0	1350.9					aveNOG[1]	09TYS@biNOG,0DNY4@chorNOG,0V4XP@meNOG,0XQE8@NOG,12NFS@opiNOG,1CXVJ@veNOG,KOG2032@euNOG	KOG2032|2.5e-208|699.0	O	HEAT repeat
g_745	9031.ENSGALP00000026210	1.5e-176	571.5	NR0B1		K08562		aveNOG[1]	04MT0@aveNOG,09ZFJ@biNOG,0DKY4@chorNOG,0VACM@meNOG,0XRZC@NOG,12RZ6@opiNOG,1CVT4@veNOG,KOG3575@euNOG	04MT0|4.9e-174|580.8	T	nuclear receptor subfamily 0, group B, member 1
g_747	9031.ENSGALP00000035827	2.1e-87	286.6					aveNOG[1]	0XQE8@NOG,KOG2032@euNOG	KOG2032|4e-19|71.8	O	HEAT repeat
g_748	9103.ENSMGAP00000015507	3.9e-289	956					aveNOG[1]	09TYS@biNOG,0DNY4@chorNOG,0V4XP@meNOG,0XQE8@NOG,12NFS@opiNOG,1CXVJ@veNOG,KOG2032@euNOG	KOG2032|5.4e-140|472.5	O	HEAT repeat
g_749	9031.ENSGALP00000026209	9.4e-191	623					aveNOG[1]	04K3C@aveNOG,09TIT@biNOG,0DEVE@chorNOG,0IF09@euNOG,0V4HR@meNOG,11HVB@NOG,13NA4@opiNOG,1CPJ5@veNOG	0IF09|3.5e-124|418.1	S	chromosome X open reading frame 21
g_753	9103.ENSMGAP00000015590	5.6e-189	622.5					aveNOG[1]	09TYS@biNOG,0DNY4@chorNOG,0V4XP@meNOG,0XQE8@NOG,12NFS@opiNOG,1CXVJ@veNOG,KOG2032@euNOG	KOG2032|1.8e-66|228.7	O	HEAT repeat
g_754	13735.ENSPSIP00000012320	1.6e-144	475.8					aveNOG[1]	09UEN@biNOG,0DHY2@chorNOG,0V5DZ@meNOG,0XRI7@NOG,131SD@opiNOG,1CSNN@veNOG,KOG3689@euNOG	KOG3689|3.7e-73|251.0	T	Phosphodiesterase
g_755	59729.ENSTGUP00000013972	6.2e-282	928.9					aveNOG[1]	09WSH@biNOG,0DI27@chorNOG,0V7QR@meNOG,0XR0F@NOG,134FY@opiNOG,1CSST@veNOG,KOG3865@euNOG	KOG3865|7.2e-198|663.7	T	arrestin
g_756	13735.ENSPSIP00000017862	6.1e-135	439.6					aveNOG[1]	0B6W3@biNOG,0E9T7@chorNOG,0IUMX@euNOG,0WJNF@meNOG,11CVU@NOG,13GW9@opiNOG,1DGMC@veNOG	0IUMX|3.7e-150|503.9	B	WD repeat domain 73
g_757	9601.ENSPPYP00000020778	2e-168	554.5					aveNOG[1]	09VEK@biNOG,0DGPE@chorNOG,0RR0J@homNOG,0UII5@maNOG,0V6DS@meNOG,0XX2M@NOG,12RXZ@opiNOG,1698U@prNOG,1AU23@spriNOG,1CRD7@veNOG,KOG3607@euNOG	0DGPE|3.5e-213|714.1	O	ADAM metallopeptidase domain 9
g_759	9031.ENSGALP00000027908	0	1215.5	SLCO2B1				aveNOG[1]	04G6C@aveNOG,09TNP@biNOG,0DIGK@chorNOG,0V4MT@meNOG,0XRSF@NOG,12NAH@opiNOG,1CT74@veNOG,KOG3626@euNOG	KOG3626|1.9e-201|675.1	Q	Solute carrier organic anion transporter family member
g_762	9031.ENSGALP00000035570	2e-129	422.7					aveNOG[1]	04KTY@aveNOG,0A57K@biNOG,0DSMI@chorNOG,0VF9F@meNOG,13KEY@opiNOG,1D1WJ@veNOG,COG4886@NOG,KOG0619@euNOG	0DSMI|1.9e-135|455.3	T	Trophoblast glycoprotein-like
g_763	9986.ENSOCUP00000004948	5.8e-138	447.7					aveNOG[1]	09XNJ@biNOG,0DRJR@chorNOG,0UNPJ@maNOG,0V8K9@meNOG,12RAR@opiNOG,1AZVZ@spriNOG,1D0TA@veNOG,COG1109@NOG,KOG1220@euNOG	1AZVZ|1.1e-142|480.7	G	Phosphoglucomutase 2-like 1
g_766	9031.ENSGALP00000035575	1.3e-58	187.7	KCNE3		K04897		aveNOG[1]	04Q79@aveNOG,0A8HT@biNOG,0DV2B@chorNOG,0IZ1X@euNOG,0VJCT@meNOG,0XU3Y@NOG,13U2U@opiNOG,1D4CY@veNOG	0IZ1X|5.5e-43|148.9	P	Potassium voltage-gated channel, Isk-related family, member 3
g_767	9813.ENSPCAP00000011941	8.2e-81	265					aveNOG[1]	09WJB@biNOG,0DHUN@chorNOG,0UK4R@maNOG,0V7HW@meNOG,13PU9@opiNOG,1CSJB@veNOG,COG0321@NOG,KOG0325@euNOG	KOG0325|3.5e-69|237.9	H	Catalyzes the transfer of endogenously produced octanoic acid from octanoyl-acyl-carrier-protein onto the lipoyl domains of lipoate-dependent enzymes. Lipoyl-ACP can also act as a substrate although octanoyl-ACP is likely to be the physiological substrate (By similarity)
g_768	9031.ENSGALP00000027913	8.2e-87	280	POLD3	GO:0005575,GO:0005622,GO:0005623,GO:0005634,GO:0005654,GO:0006139,GO:0006259,GO:0006281,GO:0006284,GO:0006725,GO:0006807,GO:0006950,GO:0006974,GO:0008150,GO:0008152,GO:0009987,GO:0031974,GO:0031981,GO:0033554,GO:0034641,GO:0043170,GO:0043226,GO:0043227,GO:0043229,GO:0043231,GO:0043233,GO:0044237,GO:0044238,GO:0044260,GO:0044422,GO:0044424,GO:0044428,GO:0044446,GO:0044464,GO:0044699,GO:0044763,GO:…			aveNOG[1]	04P39@aveNOG,0A00D@biNOG,0DMK1@chorNOG,0IGGV@euNOG,0VAX2@meNOG,0XSD1@NOG,12SG1@opiNOG,1CWFB@veNOG	0IGGV|1.2e-77|265.8	L	polymerase (DNA-directed), delta 3, accessory subunit
g_769	9031.ENSGALP00000027913	1.4e-126	412.5	POLD3	GO:0005575,GO:0005622,GO:0005623,GO:0005634,GO:0005654,GO:0006139,GO:0006259,GO:0006281,GO:0006284,GO:0006725,GO:0006807,GO:0006950,GO:0006974,GO:0008150,GO:0008152,GO:0009987,GO:0031974,GO:0031981,GO:0033554,GO:0034641,GO:0043170,GO:0043226,GO:0043227,GO:0043229,GO:0043231,GO:0043233,GO:0044237,GO:0044238,GO:0044260,GO:0044422,GO:0044424,GO:0044428,GO:0044446,GO:0044464,GO:0044699,GO:0044763,GO:…			aveNOG[1]	04P39@aveNOG,0A00D@biNOG,0DMK1@chorNOG,0IGGV@euNOG,0VAX2@meNOG,0XSD1@NOG,12SG1@opiNOG,1CWFB@veNOG	0IGGV|2.3e-57|199.0	L	polymerase (DNA-directed), delta 3, accessory subunit
g_771	9031.ENSGALP00000027915	7.9e-287	943.2	CHRDL2		K17280		aveNOG[1]	04JCH@aveNOG,09XAW@biNOG,0DINB@chorNOG,0IF8R@euNOG,0V899@meNOG,0YI5E@NOG,12QF2@opiNOG,1CTD7@veNOG	0IF8R|8.2e-170|570.1	O	Chordin-like
g_774	9103.ENSMGAP00000016234	0	1127.6	RNF169				aveNOG[1]	04MGB@aveNOG,09VIF@biNOG,0DGT6@chorNOG,0IGCB@euNOG,0V6HN@meNOG,11GT3@NOG,12TIW@opiNOG,1CRH8@veNOG	0IGCB|9.3e-256|854.7	O	RING finger protein 169
g_775	9031.ENSGALP00000027918	6e-298	981.5					aveNOG[1]	09Z0B@biNOG,0DKFB@chorNOG,0V9XT@meNOG,13MNR@opiNOG,1CV9E@veNOG,COG4886@NOG,KOG0619@euNOG	13MNR|1.3e-177|596.6	T	X-ray radiation resistance associated 1
g_776	9031.ENSGALP00000027920	3.3e-66	214.9	SPCS2				aveNOG[1]	04M0Z@aveNOG,09X6Q@biNOG,0DFP2@chorNOG,0V85C@meNOG,11HIK@NOG,12U88@opiNOG,1CQCI@veNOG,KOG4072@euNOG	KOG4072|1.4e-47|165.9	U	signal peptidase complex subunit 2 homolog (S. cerevisiae)
g_777	9031.ENSGALP00000027920	4.3e-67	214.8	SPCS2				aveNOG[1]	04M0Z@aveNOG,09X6Q@biNOG,0DFP2@chorNOG,0V85C@meNOG,11HIK@NOG,12U88@opiNOG,1CQCI@veNOG,KOG4072@euNOG	KOG4072|4.2e-41|144.7	U	signal peptidase complex subunit 2 homolog (S. cerevisiae)
g_778	9031.ENSGALP00000021857	5.7e-202	665.4					aveNOG[1]	09YDG@biNOG,0DGG2@chorNOG,0IFVF@euNOG,0VAZB@meNOG,0Y74Z@NOG,12RDV@opiNOG,1CR5Q@veNOG	0IFVF|2.5e-175|587.8	S	sialidase
g_779	7244.FBpp0237174	7.7e-89	290					aveNOG[1]	03E6N@artNOG,0AYNT@biNOG,0H00T@dipNOG,0HXRD@droNOG,0T2PX@inNOG,0W9GK@meNOG,0XS5J@NOG,13VJ5@opiNOG,KOG1591@euNOG	13VJ5|8.1e-124|418.4	E	prolyl 4-hydroxylase
g_780	9103.ENSMGAP00000018466	1.9e-170	557.8	C2CD3				aveNOG[1]	04GN9@aveNOG,09T9N@biNOG,0DEKU@chorNOG,0IDYN@euNOG,0V48R@meNOG,0XNN4@NOG,12N4G@opiNOG,1CPAR@veNOG	0IDYN|1.2e-94|322.2	S	C2 calcium-dependent domain containing 3
g_782	9031.ENSGALP00000027932	9.5e-202	663.5	UCP3		K15103		aveNOG[1]	04GGN@aveNOG,09V6U@biNOG,0DGFK@chorNOG,0V5UJ@meNOG,0XRV1@NOG,12SXC@opiNOG,1CR58@veNOG,KOG0753@euNOG	KOG0753|8.2e-124|418.4	C	UnCoupling Protein
g_783	9031.ENSGALP00000027933	5.4e-215	700.2	DNAJB13		K09519		aveNOG[1]	04IPF@aveNOG,09W43@biNOG,0DHD2@chorNOG,0V72E@meNOG,12PPD@opiNOG,1CS3A@veNOG,COG0484@NOG,KOG0714@euNOG	04IPF|1e-200|669.1	O	DnaJ (Hsp40) homolog, subfamily B, member 13
g_784	9986.ENSOCUP00000010826	1.2e-228	745.6					aveNOG[1]	0B02Q@biNOG,0E5JI@chorNOG,0KD24@euNOG,0V11D@maNOG,0WCJ9@meNOG,0XWCN@NOG,14T82@opiNOG,1B9Y5@spriNOG,1DCJF@veNOG	0KD24|4.1e-230|767.5	S	WD domain, G-beta repeat
g_785	9031.ENSGALP00000028039	2.5e-54	174.2					aveNOG[1]	04QCS@aveNOG,0A9AI@biNOG,0DV4V@chorNOG,0VJHX@meNOG,0XXMU@NOG,13XEK@opiNOG,1D4KK@veNOG,KOG4138@euNOG	KOG4138|3.2e-26|94.7	O	cytochrome c oxidase assembly factor 4 homolog (S. cerevisiae)
g_786	9031.ENSGALP00000027940	1.3e-138	450.6	PLEKHB1				aveNOG[1]	04KBR@aveNOG,0A0EY@biNOG,0DN1U@chorNOG,0IXBE@euNOG,0VBB7@meNOG,0Y287@NOG,13R6C@opiNOG,1CWY4@veNOG	0IXBE|4e-97|328.4	T	pleckstrin homology domain containing, family B (evectins) member 1
g_787	9031.ENSGALP00000027942	3.9e-120	390	FAM168A				aveNOG[1]	04N7J@aveNOG,09W9H@biNOG,0DHIS@chorNOG,0IHUV@euNOG,0V77T@meNOG,0XR79@NOG,12UAE@opiNOG,1CS8Z@veNOG	0IHUV|3.1e-117|394.6	S	Family with sequence similarity 168, member A
g_788	9103.ENSMGAP00000017383	3.8e-136	445.5					aveNOG[1]	04PZH@aveNOG,09XX0@biNOG,0DHHY@chorNOG,0IKJV@euNOG,0V5NR@meNOG,0YDMP@NOG,13KSE@opiNOG,1CS86@veNOG	0IKJV|4.8e-108|365.7	T	RELT tumor necrosis factor receptor
g_790	9796.ENSECAP00000006691	0	1668.9					aveNOG[1]	0B0CE@biNOG,0E5TJ@chorNOG,0KDC9@euNOG,0V187@maNOG,0WCVE@meNOG,0XSIJ@NOG,14TIM@opiNOG,1DCT9@veNOG	0KDC9|0.0|1873.2	T	Rho guanine nucleotide exchange factor (GEF) 17
g_791	7897.ENSLACP00000008779	9.2e-181	590.2					aveNOG[1]	0B58U@biNOG,0E8SH@chorNOG,0IRSU@euNOG,0WHVH@meNOG,0ZJE5@NOG,13EDH@opiNOG,1DFPI@veNOG	0IRSU|4.6e-184|618.4	T	NA
g_792	9031.ENSGALP00000027948	3.8e-224	734.4	P2RY6	GO:0005575,GO:0005623,GO:0005886,GO:0016020,GO:0044464,GO:0071944	K04272		aveNOG[1]	04HGT@aveNOG,0A3VX@biNOG,0DMUH@chorNOG,0IJR4@euNOG,0VEQJ@meNOG,0YAZW@NOG,13I03@opiNOG,1CWPY@veNOG	0IJR4|6.1e-166|555.3	T	Pyrimidinergic receptor P2Y, G-protein coupled, 6
g_794	9031.ENSGALP00000027949	5.5e-206	675.8	P2RY2				aveNOG[1]	04GFW@aveNOG,09ZC8@biNOG,0DQE8@chorNOG,0IIAQ@euNOG,0VA7A@meNOG,0XQNZ@NOG,12RKR@opiNOG,1CZG5@veNOG	0IIAQ|2.3e-162|543.6	T	receptor P2Y, G-protein coupled
g_797	9031.ENSGALP00000012295	2e-41	131.6					aveNOG[1]	0A5RU@biNOG,0DUMB@chorNOG,0VGNY@meNOG,0Y65V@NOG,13JGH@opiNOG,1D7IQ@veNOG,KOG1075@euNOG	1D7IQ|7.3e-36|127.3	S	Reverse transcriptase (RNA-dependent DNA polymerase)
g_798	10090.ENSMUSP00000032931	3.7e-249	814.1					aveNOG[1]	0B3MQ@biNOG,0E7SU@chorNOG,0INNZ@euNOG,0V2UI@maNOG,0WG1N@meNOG,0XSX6@NOG,13BS4@opiNOG,1972W@roNOG,1BASM@spriNOG,1DESP@veNOG	1972W|5.5e-261|871.8	Z	FCH and double SH3 domains 2
g_799	13735.ENSPSIP00000009770	1.9e-162	532.3					aveNOG[1]	09ZHM@biNOG,0DIK1@chorNOG,0VAEY@meNOG,12PG3@opiNOG,1CTAU@veNOG,COG0092@NOG,KOG3181@euNOG	KOG3181|2.9e-158|530.8	J	ribosomal protein s3
g_800	9031.ENSGALP00000018265	6e-277	904.3	SERPINH1	GO:0003674,GO:0004857,GO:0004866,GO:0004867,GO:0005575,GO:0005622,GO:0005623,GO:0005737,GO:0005783,GO:0005788,GO:0008150,GO:0010466,GO:0010951,GO:0019222,GO:0030162,GO:0030234,GO:0030414,GO:0031974,GO:0043086,GO:0043226,GO:0043227,GO:0043229,GO:0043231,GO:0043233,GO:0044092,GO:0044422,GO:0044424,GO:0044432,GO:0044444,GO:0044446,GO:0044464,GO:0050789,GO:0050790,GO:0051246,GO:0051336,GO:0051346,GO:…	K09501		aveNOG[1]	04KSZ@aveNOG,09V38@biNOG,0DGCK@chorNOG,0V62T@meNOG,12TWY@opiNOG,1CR23@veNOG,COG4826@NOG,KOG2392@euNOG	04KSZ|5.7e-288|957.8	V	serpin peptidase inhibitor, clade H (heat shock protein 47), member 1, (collagen binding protein 1)
g_802	9031.ENSGALP00000027954	1.2e-242	799.9	GDPD5	GO:0005575,GO:0005622,GO:0005623,GO:0005737,GO:0012505,GO:0030426,GO:0030427,GO:0042995,GO:0043005,GO:0044424,GO:0044444,GO:0044463,GO:0044464,GO:0048471,GO:0097458			aveNOG[1]	04N87@aveNOG,09TV3@biNOG,0DF5H@chorNOG,0V4UA@meNOG,12SSC@opiNOG,1CPV5@veNOG,COG0584@NOG,KOG2258@euNOG	KOG2258|1.8e-28|102.1	C	glycerophosphodiester phosphodiesterase
g_803	9031.ENSGALP00000027958	0	1316.9					aveNOG[1]	09ZX7@biNOG,0DMFW@chorNOG,0VATU@meNOG,0XNX8@NOG,12SD7@opiNOG,1CWB7@veNOG,KOG4441@euNOG	09ZX7|0.0|1073.3	T	kelch-like 35 (Drosophila)
g_804	8128.ENSONIP00000012663	3.4e-31	98.2					aveNOG[1]	0APXC@biNOG,0E3JP@chorNOG,0J32Y@euNOG,0N86I@fiNOG,0W297@meNOG,0ZMQB@NOG,13XCA@opiNOG,1DASQ@veNOG	0J32Y|1.8e-32|116.9	S	MAP6 domain containing 1
g_805	9031.ENSGALP00000022878	1.1e-212	700.5	MOGAT2		K14457		aveNOG[1]	04P43@aveNOG,09XQ2@biNOG,0DKSG@chorNOG,0V8MS@meNOG,0XTG3@NOG,12TQI@opiNOG,1D050@veNOG,KOG0831@euNOG	KOG0831|8.8e-118|398.2	I	o-acyltransferase
g_806	59729.ENSTGUP00000013963	1.2e-241	796.1			K11160		aveNOG[1]	04H9E@aveNOG,09XQ2@biNOG,0DJ1T@chorNOG,0V8MS@meNOG,0XTG3@NOG,12TQI@opiNOG,1CTTC@veNOG,KOG0831@euNOG	KOG0831|3.1e-124|419.6	I	o-acyltransferase
g_807	9031.ENSGALP00000020552	2e-136	446.3		GO:0005575,GO:0005576,GO:0005615,GO:0044421	K06716		aveNOG[1]	04PPT@aveNOG,09UWM@biNOG,0DG61@chorNOG,0IGR0@euNOG,0V5WD@meNOG,11WZG@NOG,13NMJ@opiNOG,1CQVP@veNOG	0IGR0|1.5e-115|389.3	O	ADP-ribosyltransferase 1
g_809	7176.CPIJ006657-PA	3.1e-39	122.9					aveNOG[1]	0AI0J@biNOG,0JEVK@euNOG,0VVE2@meNOG,0YW7C@NOG,147F8@opiNOG	0JEVK|4.6e-11|46.3	K	component of the Mediator complex, a coactivator involved in the regulated transcription of nearly all RNA polymerase II-dependent genes. Mediator functions as a bridge to convey information from gene-specific regulatory proteins to the basal RNA polymerase II transcription machinery. Mediator is recruited to promoters by direct interactions with regulatory proteins and serves as a scaffold for t…
g_810	9031.ENSGALP00000020552	2.8e-129	422.5		GO:0005575,GO:0005576,GO:0005615,GO:0044421	K06716		aveNOG[1]	04PPT@aveNOG,09UWM@biNOG,0DG61@chorNOG,0IGR0@euNOG,0V5WD@meNOG,11WZG@NOG,13NMJ@opiNOG,1CQVP@veNOG	0IGR0|5.6e-105|354.5	O	ADP-ribosyltransferase 1
g_812	9031.ENSGALP00000014826	7.4e-141	460.7		GO:0005575,GO:0005576,GO:0005615,GO:0044421	K06716		aveNOG[1]	04PPT@aveNOG,09UWM@biNOG,0DG61@chorNOG,0IGR0@euNOG,0V5WD@meNOG,11WZG@NOG,13NMJ@opiNOG,1CQVP@veNOG	0IGR0|4.5e-113|381.1	O	ADP-ribosyltransferase 1
g_813	13735.ENSPSIP00000000326	3e-87	283.9					aveNOG[1]	0A1R9@biNOG,0DPDH@chorNOG,0J8VA@euNOG,0VCM1@meNOG,1167J@NOG,13MY7@opiNOG,1CYBF@veNOG	0J8VA|1.6e-90|307.9	S	ADP-ribosyltransferase 3
g_815	9031.ENSGALP00000035586	4.2e-240	789.8					aveNOG[1]	09TGF@biNOG,0DEU9@chorNOG,0V4FG@meNOG,0XQGR@NOG,12SGS@opiNOG,1CPI0@veNOG,KOG3645@euNOG	1CPI0|6.2e-246|820.4	T	Cholinergic receptor, nicotinic, alpha
g_816	9913.ENSBTAP00000011092	0	2920.9					aveNOG[1]	0B6MV@biNOG,0E9NR@chorNOG,0IU4C@euNOG,0WJCW@meNOG,10061@NOG,13GFW@opiNOG	0IU4C|0.0|2948.7	U, Y	Nucleoporin autopeptidase
g_818	9103.ENSMGAP00000003951	1.5e-168	553.6					aveNOG[1]	04PVD@aveNOG,09V23@biNOG,0DGBH@chorNOG,0V61S@meNOG,0XT2T@NOG,130X6@opiNOG,1CR0X@veNOG,KOG3979@euNOG	KOG3979|3.2e-78|267.5	T	Post-GPI attachment to proteins
g_819	9103.ENSMGAP00000016970	1.4e-136	439			K07863		aveNOG[1]	04F8N@aveNOG,09V31@biNOG,0DGCD@chorNOG,0V62N@meNOG,13EM0@opiNOG,1CR1V@veNOG,COG1100@NOG,KOG0393@euNOG	04F8N|5.5e-136|453.7	S	rho-related GTP-binding protein RhoG-like
g_822	13735.ENSPSIP00000010058	0	1163.6					aveNOG[1]	0A080@biNOG,0DMUQ@chorNOG,0VB42@meNOG,0XRM6@NOG,12U3H@opiNOG,1CWQ6@veNOG,KOG4403@euNOG	KOG4403|2.2e-260|870.2	U	Stromal interaction molecule
g_823	8364.ENSXETP00000039846	1e-294	968.4					aveNOG[1]	0A4ZS@biNOG,0DSEM@chorNOG,0V4BE@meNOG,12NMW@opiNOG,1D1QA@veNOG,COG0733@NOG,KOG3659@euNOG	1D1QA|0.0|1082.5	P	solute carrier family 6 (neurotransmitter transporter, L-proline), member 7
g_824	43179.ENSSTOP00000000698	0	1750.3					aveNOG[1]	09TTN@biNOG,0DF3Z@chorNOG,0USGJ@maNOG,0V4SY@meNOG,12P2W@opiNOG,18TZM@roNOG,1AU7A@spriNOG,1CPTT@veNOG,COG0209@NOG,KOG1112@euNOG	KOG1112|0.0|1719.4	F	Provides the precursors necessary for DNA synthesis. Catalyzes the biosynthesis of deoxyribonucleotides from the corresponding ribonucleotides (By similarity)
g_825	9103.ENSMGAP00000017157	3.4e-199	651.1					aveNOG[1]	0A1NB@biNOG,0DPAJ@chorNOG,0IGZJ@euNOG,0VCI2@meNOG,0YB92@NOG,12TRV@opiNOG,1CY8H@veNOG	0IGZJ|1.5e-155|521.0	T	Olfactory receptor
g_827	9031.ENSGALP00000029379	1.9e-190	623.5					aveNOG[1]	09UNH@biNOG,0DFYD@chorNOG,0IIRM@euNOG,0V5N2@meNOG,114NG@NOG,1363M@opiNOG,1CQMU@veNOG	0IIRM|8.9e-143|479.1	T	Olfactory receptor
g_830	9986.ENSOCUP00000006811	1.5e-22	71.4					aveNOG[1]	0A17A@biNOG,0DKVY@chorNOG,0IJQ5@euNOG,0UG1C@maNOG,0V9ZR@meNOG,0YDJ8@NOG,13JFI@opiNOG,1ARV6@spriNOG,1D071@veNOG	0IJQ5|4.4e-22|82.6	T	olfactory receptor, family 51, subfamily H, member 1
g_831	30611.ENSOGAP00000015816	1.1e-212	698.2					aveNOG[1]	09XGW@biNOG,0DIUF@chorNOG,0IGD6@euNOG,0UKTD@maNOG,0V8EY@meNOG,120HT@NOG,13J46@opiNOG,16FQ1@prNOG,1AW9I@spriNOG,1CTJS@veNOG	0IGD6|2e-157|529.4	T	Olfactory receptor, family 51, subfamily
g_832	9031.ENSGALP00000029384	3.9e-186	609					aveNOG[1]	0A3R5@biNOG,0DRYI@chorNOG,0IKQM@euNOG,0VEBN@meNOG,113G8@NOG,13HKJ@opiNOG,1D1BJ@veNOG	0IKQM|1.4e-163|547.6	T	Olfactory receptor
g_833	9031.ENSGALP00000000630	1.5e-183	600.5					aveNOG[1]	0A3R5@biNOG,0DRYI@chorNOG,0IKQM@euNOG,0VEBN@meNOG,113G8@NOG,13HKJ@opiNOG,1D1BJ@veNOG	0IKQM|4.8e-162|542.5	T	Olfactory receptor
g_834	9031.ENSGALP00000035588	6.4e-187	611.6					aveNOG[1]	0A3R5@biNOG,0DRYI@chorNOG,0IKQM@euNOG,0VEBN@meNOG,113G8@NOG,13HKJ@opiNOG,1D1BJ@veNOG	0IKQM|1.2e-162|544.4	T	Olfactory receptor
g_835	9031.ENSGALP00000035588	2.2e-184	603.4					aveNOG[1]	0A3R5@biNOG,0DRYI@chorNOG,0IKQM@euNOG,0VEBN@meNOG,113G8@NOG,13HKJ@opiNOG,1D1BJ@veNOG	0IKQM|9.5e-161|538.2	T	Olfactory receptor
g_836	9031.ENSGALP00000035588	1.4e-190	623.5					aveNOG[1]	0A3R5@biNOG,0DRYI@chorNOG,0IKQM@euNOG,0VEBN@meNOG,113G8@NOG,13HKJ@opiNOG,1D1BJ@veNOG	0IKQM|9.1e-160|535.0	T	Olfactory receptor
g_837	9031.ENSGALP00000035588	5.8e-186	608.4					aveNOG[1]	0A3R5@biNOG,0DRYI@chorNOG,0IKQM@euNOG,0VEBN@meNOG,113G8@NOG,13HKJ@opiNOG,1D1BJ@veNOG	0IKQM|1.1e-162|544.6	T	Olfactory receptor
g_838	9031.ENSGALP00000027978	2.8e-197	645.4					aveNOG[1]	0A0B9@biNOG,0DMY0@chorNOG,0IVFV@euNOG,0VB7D@meNOG,11D9B@NOG,13MFZ@opiNOG,1CWTX@veNOG	0IVFV|5.9e-150|503.0	T	Olfactory receptor, family 51, subfamily M, member 1
g_839	7668.SPU_004406tr	2.6e-161	526.3					aveNOG[1]	0A4EB@biNOG,0VF98@meNOG,13QN6@opiNOG,COG1018@NOG,KOG3378@euNOG	KOG3378|7.5e-27|98.2	C	Involved in oxygen transport from the lung to the various peripheral tissues
g_840	7668.SPU_004406tr	7.2e-173	563.6					aveNOG[1]	0A4EB@biNOG,0VF98@meNOG,13QN6@opiNOG,COG1018@NOG,KOG3378@euNOG	KOG3378|9.9e-29|104.4	C	Involved in oxygen transport from the lung to the various peripheral tissues
g_841	7668.SPU_004406tr	1.8e-164	536.4					aveNOG[1]	0A4EB@biNOG,0VF98@meNOG,13QN6@opiNOG,COG1018@NOG,KOG3378@euNOG	KOG3378|1.1e-25|94.4	C	Involved in oxygen transport from the lung to the various peripheral tissues
g_842	7668.SPU_004406tr	1.1e-158	517.7					aveNOG[1]	0A4EB@biNOG,0VF98@meNOG,13QN6@opiNOG,COG1018@NOG,KOG3378@euNOG	KOG3378|1.5e-26|97.3	C	Involved in oxygen transport from the lung to the various peripheral tissues
g_843	9785.ENSLAFP00000018140	4.2e-38	123.5					aveNOG[1]	09UMT@biNOG,0DRQS@chorNOG,0II1I@euNOG,0UUHD@maNOG,0V5ME@meNOG,0YB92@NOG,130C5@opiNOG,1D0YH@veNOG	0II1I|3.1e-36|129.1	T	olfactory receptor family 52 subfamily
g_844	9031.ENSGALP00000027972	2.5e-195	640.5	FOLR1				aveNOG[1]	04JYQ@aveNOG,09ZQX@biNOG,0DM8T@chorNOG,0IFFP@euNOG,0VAMD@meNOG,11IU4@NOG,12RQH@opiNOG,1CW3Z@veNOG	0IFFP|3.7e-78|267.7	T	Folate receptor
g_845	9103.ENSMGAP00000016260	1.3e-141	464.3					aveNOG[1]	09UMT@biNOG,0DFXN@chorNOG,0II1I@euNOG,0V5ME@meNOG,0YB92@NOG,130C5@opiNOG,1CQM3@veNOG	0II1I|1e-149|501.9	T	olfactory receptor family 52 subfamily
g_846	9986.ENSOCUP00000007837	1.5e-68	221.1					aveNOG[1]	0B0IS@biNOG,0E5YY@chorNOG,0KDIF@euNOG,0V1CE@maNOG,0WD1W@meNOG,0XT8C@NOG,14TRE@opiNOG,1BA5E@spriNOG,1DCYD@veNOG	0KDIF|1.8e-84|288.8	O	ubiquilin 3
g_847	9103.ENSMGAP00000016260	5.7e-210	689.3					aveNOG[1]	09UMT@biNOG,0DFXN@chorNOG,0II1I@euNOG,0V5ME@meNOG,0YB92@NOG,130C5@opiNOG,1CQM3@veNOG	0II1I|2.1e-162|543.6	T	olfactory receptor family 52 subfamily
g_849	10020.ENSDORP00000011467	3.3e-105	342.7					aveNOG[1]	0A0YI@biNOG,0DNJS@chorNOG,0UKFZ@maNOG,0VBV0@meNOG,13PUI@opiNOG,18UV4@roNOG,1AU6F@spriNOG,1CXGW@veNOG,COG0186@NOG,KOG1728@euNOG	KOG1728|3.2e-112|380.2	J	ribosomal protein S11
g_850	9031.ENSGALP00000005392	0	1439.7					aveNOG[1]	04JVU@aveNOG,09XHF@biNOG,0DIUY@chorNOG,0V8FH@meNOG,0XY4X@NOG,12S9X@opiNOG,1CTK9@veNOG,KOG3695@euNOG	KOG3695|1.4e-209|701.5	S	Family with sequence similarity 160, member
g_853	10116.ENSRNOP00000056459	7.3e-179	588.9					aveNOG[1]	09V2I@biNOG,0DGBU@chorNOG,0UI2C@maNOG,0V625@meNOG,0YWWI@NOG,12NQG@opiNOG,18ZY0@roNOG,1ATN9@spriNOG,1CR1A@veNOG,KOG0500@euNOG	0DGBU|2.2e-208|698.9	P	cyclic nucleotide gated channel alpha
g_854	9031.ENSGALP00000027969	8.8e-292	959.5					aveNOG[1]	0A0E7@biNOG,0DKXD@chorNOG,0VBAF@meNOG,0XRW9@NOG,12Q94@opiNOG,1CWX9@veNOG,KOG3656@euNOG	1CWX9|3.5e-194|649.2	T	Cholecystokinin B receptor
g_855	43179.ENSSTOP00000008099	1.9e-265	877.3					aveNOG[1]	09ZTA@biNOG,0DMBI@chorNOG,0USD6@maNOG,0VAPK@meNOG,0YYPB@NOG,13I87@opiNOG,18W61@roNOG,1ATQK@spriNOG,1CW6P@veNOG,KOG3770@euNOG	KOG3770|1.7e-167|563.3	I	Sphingomyelin phosphodiesterase
g_856	13616.ENSMODP00000023186	4.8e-256	844.2					aveNOG[1]	09VJ5@biNOG,0DF9H@chorNOG,0IEKA@euNOG,0UGHA@maNOG,0V6IA@meNOG,0YEVS@NOG,12PBZ@opiNOG,1CPZ4@veNOG	0IEKA|1.5e-223|748.9	O	amyloid beta (A4) precursor protein-binding, family B, member
g_857	9103.ENSMGAP00000005746	2.6e-126	413.5					aveNOG[1]	0A283@biNOG,0DNBW@chorNOG,0VD40@meNOG,0XQ5D@NOG,1361K@opiNOG,1CX90@veNOG,KOG1565@euNOG	0A283|3.2e-166|557.3	O, W	Hemopexin
g_858	9913.ENSBTAP00000004636	0	1356.8					aveNOG[1]	0B0PJ@biNOG,0E635@chorNOG,0KDPP@euNOG,0V307@maNOG,0WD6W@meNOG,0ZAM4@NOG,14TWN@opiNOG,1DD2E@veNOG	0KDPP|0.0|1493.2	O	tripartite motif containing 3
g_860	8083.ENSXMAP00000009482	6e-94	308.7					aveNOG[1]	09ZKZ@biNOG,0DS70@chorNOG,0MYD8@fiNOG,0VAHM@meNOG,0XQR0@NOG,12RNU@opiNOG,1D1G3@veNOG,KOG1922@euNOG	12RNU|7.3e-106|358.9	T, Z	inverted formin, FH2 and WH2 domain containing
g_861	9103.ENSMGAP00000016219	9.3e-239	784.7					aveNOG[1]	04GUN@aveNOG,0A1FV@biNOG,0DP3E@chorNOG,0VCBE@meNOG,0YJUM@NOG,12QVE@opiNOG,1CY1E@veNOG,KOG3876@euNOG	KOG3876|1.9e-170|570.7	T	adp-ribosylation factor interacting protein
g_862	13616.ENSMODP00000023175	3e-38	124.7					aveNOG[1]	0A8GS@biNOG,0DV1F@chorNOG,0UVUU@maNOG,0VJD3@meNOG,11TUA@NOG,13VXS@opiNOG,1D4C4@veNOG,KOG3479@euNOG	KOG3479|5.7e-24|88.6	U	mitochondrial import inner membrane translocase, subunit
g_864	9031.ENSGALP00000027965	0	1260.3					aveNOG[1]	09XIP@biNOG,0DXRY@chorNOG,0V8GU@meNOG,0XRWX@NOG,12RDP@opiNOG,1D6N4@veNOG,KOG0274@euNOG	0DXRY|0.0|1294.1	S	FBOX
g_866	9031.ENSGALP00000027964	2.3e-301	991.8	ILK				aveNOG[1]	04K58@aveNOG,0A2Y3@biNOG,0DJCK@chorNOG,0VDTB@meNOG,13IRQ@opiNOG,1CR4J@veNOG,COG0666@NOG,KOG0195@euNOG	KOG0195|1.9e-240|802.8	T	integrin-linked kinase
g_867	9986.ENSOCUP00000005701	2.4e-93	305.4					aveNOG[1]	09WGU@biNOG,0DHS9@chorNOG,0UK1F@maNOG,0V7FB@meNOG,13TH2@opiNOG,1AVHT@spriNOG,1CSGJ@veNOG,COG5162@NOG,KOG3423@euNOG	KOG3423|7.4e-62|213.5	K	TAF10 RNA polymerase II, TATA box binding protein (TBP)-associated factor
g_868	7897.ENSLACP00000007916	7.9e-255	840.5					aveNOG[1]	0A178@biNOG,0DNUX@chorNOG,0IICY@euNOG,0VC2W@meNOG,13I7B@opiNOG,1CXSC@veNOG,COG4934@NOG	0IICY|2.2e-208|698.4	O	tripeptidyl peptidase
g_869	9031.ENSGALP00000027960	0	4700.5	DCHS1				aveNOG[1]	04JFB@aveNOG,09UGS@biNOG,0DFSJ@chorNOG,0V5G3@meNOG,0XPEI@NOG,12N7V@opiNOG,1CQG4@veNOG,KOG3594@euNOG	04JFB|0.0|4844.5	T	Cadherin domain
g_870	9031.ENSGALP00000027960	0	1945	DCHS1				aveNOG[1]	04JFB@aveNOG,09UGS@biNOG,0DFSJ@chorNOG,0V5G3@meNOG,0XPEI@NOG,12N7V@opiNOG,1CQG4@veNOG,KOG3594@euNOG	04JFB|0.0|1432.3	T	Cadherin domain
g_874	9031.ENSGALP00000027959	9.6e-49	158.3	LCMT2		K15451		aveNOG[1]	04IZP@aveNOG,09URT@biNOG,0DI3H@chorNOG,0V5R8@meNOG,0YB9K@NOG,14F6I@opiNOG,1CSTW@veNOG,KOG2918@euNOG	KOG2918|1.1e-19|72.7	O	leucine carboxyl methyltransferase
g_875	13735.ENSPSIP00000003682	4e-213	701.7					aveNOG[1]	09XZ2@biNOG,0DJC3@chorNOG,0V8JH@meNOG,0Y1FN@NOG,12QN7@opiNOG,1CU4A@veNOG,KOG1449@euNOG	0DJC3|7.5e-231|773.8	T	rho GTPase activating protein
g_881	9031.ENSGALP00000013841	4.8e-116	376.9	MRPS25		K17404		aveNOG[1]	04IKI@aveNOG,09T4S@biNOG,0DEFY@chorNOG,0V43H@meNOG,0YI66@NOG,13PRD@opiNOG,1CP5M@veNOG,KOG4079@euNOG	KOG4079|1.3e-87|295.8	J	Ribosomal protein S25
g_882	9031.ENSGALP00000013832	3.9e-92	299.1	ZFYVE20				aveNOG[1]	04FZX@aveNOG,09VFB@biNOG,0DGQ6@chorNOG,0V6EH@meNOG,0XP0U@NOG,12PA1@opiNOG,1CRE0@veNOG,KOG1842@euNOG	KOG1842|1e-42|150.4	S	Zinc finger, FYVE domain containing 20
g_887	9031.ENSGALP00000013816	1.1e-199	657	TMCC1				aveNOG[1]	04IBQ@aveNOG,09TRG@biNOG,0DF1T@chorNOG,0V4QT@meNOG,0Y9KV@NOG,12P0G@opiNOG,1CPRK@veNOG,KOG3850@euNOG	KOG3850|1.6e-130|440.7	S	transmembrane and coiled-coil domain family
g_888	9031.ENSGALP00000013816	1.7e-95	311.2	TMCC1				aveNOG[1]	04IBQ@aveNOG,09TRG@biNOG,0DF1T@chorNOG,0V4QT@meNOG,0Y9KV@NOG,12P0G@opiNOG,1CPRK@veNOG,KOG3850@euNOG	KOG3850|1.5e-89|305.5	S	transmembrane and coiled-coil domain family
g_891	9031.ENSGALP00000013793	6.3e-282	930.6	PLXND1		K06822		aveNOG[1]	04QPB@aveNOG,0B3BM@biNOG,0E7KY@chorNOG,0WFQ6@meNOG,0ZUMY@NOG,13B9W@opiNOG,1DEMB@veNOG,KOG3610@euNOG	KOG3610|6.7e-45|156.8	T	Receptor tyrosine kinase that transduces signals from the extracellular matrix into the cytoplasm by binding to hepatocyte growth factor HGF ligand. Regulates many physiological processes including proliferation, scattering, morphogenesis and survival. Ligand binding at the cell surface induces autophosphorylation of MET on its intracellular domain that provides docking sites for downstream signa…
g_892	9031.ENSGALP00000021425	1.3e-274	904.7	PLXNB2				aveNOG[1]	04QPC@aveNOG,0B3BP@biNOG,0E7M0@chorNOG,0IN3E@euNOG,0WFQ8@meNOG,1131Q@NOG,13B9Y@opiNOG,1DEMD@veNOG	0IN3E|0.0|1148.2	T	Plexin B2
g_893	9796.ENSECAP00000011284	8.4e-32	106.4					aveNOG[1]	09ZKW@biNOG,0DM4H@chorNOG,0UQ7Z@maNOG,0VAHJ@meNOG,12541@NOG,13WDB@opiNOG,1CVZI@veNOG,KOG4012@euNOG	KOG4012|6.2e-19|72.6	B	Histone cluster 1
g_894	9103.ENSMGAP00000010697	4.9e-246	801.9			K04250		aveNOG[1]	04KVG@aveNOG,09X09@biNOG,0DIAS@chorNOG,0V7YF@meNOG,0XRW9@NOG,13KWM@opiNOG,1CT14@veNOG,KOG3656@euNOG	04KVG|1.6e-252|840.2	T	Amino terminal of the G-protein receptor rhodopsin
g_895	9031.ENSGALP00000032601	3.7e-128	422.5	MBD4	GO:0005575,GO:0005622,GO:0005623,GO:0005634,GO:0005654,GO:0006139,GO:0006220,GO:0006244,GO:0006259,GO:0006281,GO:0006284,GO:0006285,GO:0006304,GO:0006308,GO:0006725,GO:0006753,GO:0006793,GO:0006796,GO:0006807,GO:0006950,GO:0006974,GO:0008150,GO:0008152,GO:0009056,GO:0009057,GO:0009117,GO:0009166,GO:0009219,GO:0009223,GO:0009262,GO:0009264,GO:0009394,GO:0009987,GO:0019439,GO:0019637,GO:0019692,GO:…			aveNOG[1]	04NHT@aveNOG,09Z4Y@biNOG,0DKKM@chorNOG,0VA23@meNOG,11HPQ@NOG,1378I@opiNOG,1CVF2@veNOG,KOG4161@euNOG	KOG4161|3.4e-71|244.3	K	Methyl-CpG binding domain protein
g_897	59729.ENSTGUP00000010803	7.5e-89	289.1			K02912		aveNOG[1]	04J51@aveNOG,0A6Q0@biNOG,0DTPK@chorNOG,0VHHZ@meNOG,13PT9@opiNOG,1D31B@veNOG,COG1717@NOG,KOG0878@euNOG	KOG0878|6.5e-88|299.7	J	ribosomal protein L32'
g_898	9031.ENSGALP00000035436	0	2292.9	CAND2		K17263		aveNOG[1]	04EPU@aveNOG,09YZR@biNOG,0DM3W@chorNOG,0V8WG@meNOG,0XPK4@NOG,12NWM@opiNOG,1CVYY@veNOG,KOG1824@euNOG	KOG1824|0.0|1502.2	V	cullin-associated and neddylation-dissociated
g_902	9031.ENSGALP00000035437	2.4e-140	454.9	IRAK2	GO:0000187,GO:0001932,GO:0001934,GO:0002218,GO:0002221,GO:0002224,GO:0002253,GO:0002376,GO:0002682,GO:0002684,GO:0002755,GO:0002757,GO:0002758,GO:0002764,GO:0006950,GO:0006952,GO:0006955,GO:0007154,GO:0007165,GO:0008150,GO:0009893,GO:0009966,GO:0009967,GO:0009987,GO:0010562,GO:0010604,GO:0010627,GO:0010646,GO:0010647,GO:0010740,GO:0019220,GO:0019222,GO:0023051,GO:0023052,GO:0023056,GO:0031323,GO:…			aveNOG[1]	04NBE@aveNOG,0A211@biNOG,0DPNZ@chorNOG,0VCW6@meNOG,13JWZ@opiNOG,1CYMY@veNOG,COG0515@NOG,KOG1187@euNOG	04NBE|7.6e-143|480.7	T	interleukin-1 receptor-associated kinase-like
g_903	9031.ENSGALP00000013663	2.9e-86	279.9	VHL				aveNOG[1]	04PVF@aveNOG,09UR9@biNOG,0DG11@chorNOG,0V5QV@meNOG,11PRU@NOG,13TKM@opiNOG,1CQQN@veNOG,KOG4710@euNOG	KOG4710|1.1e-48|168.9	O	von Hippel-Lindau
g_904	9031.ENSGALP00000013659	3.8e-132	431.9	THUMPD3				aveNOG[1]	04F0K@aveNOG,09WCD@biNOG,0DF0X@chorNOG,0IEVP@euNOG,0V7AT@meNOG,12NBN@opiNOG,1CPQQ@veNOG,COG0116@NOG	0IEVP|3.1e-68|234.7	L	THUMP domain containing 3
g_908	8364.ENSXETP00000046988	9.8e-268	880.6					aveNOG[1]	0B3MJ@biNOG,0E7SP@chorNOG,0INNV@euNOG,0WG1F@meNOG,0YF76@NOG,13BRY@opiNOG,1DESH@veNOG	0INNV|0.0|1090.2	T	Rho GTPase activating protein 4
g_910	9031.ENSGALP00000013608	3.7e-227	745.6	RAD18	GO:0005575,GO:0005622,GO:0005623,GO:0005634,GO:0005654,GO:0006139,GO:0006259,GO:0006281,GO:0006301,GO:0006725,GO:0006807,GO:0006950,GO:0006974,GO:0008150,GO:0008152,GO:0009058,GO:0009059,GO:0009987,GO:0018130,GO:0019438,GO:0019985,GO:0031974,GO:0031981,GO:0033554,GO:0034641,GO:0034645,GO:0034654,GO:0043170,GO:0043226,GO:0043227,GO:0043229,GO:0043231,GO:0043233,GO:0044237,GO:0044238,GO:0044249,GO:…	K10627		aveNOG[1]	04NYI@aveNOG,0A1H4@biNOG,0DP50@chorNOG,0VCCN@meNOG,12N3W@opiNOG,1CY31@veNOG,COG5432@NOG,KOG0287@euNOG	KOG0287|2.9e-108|367.0	L	RAD18 homolog (S. cerevisiae)
g_912	9103.ENSMGAP00000018641	3.6e-229	751.9	OXTR				aveNOG[1]	04KQJ@aveNOG,09XTM@biNOG,0DJ5R@chorNOG,0V455@meNOG,0XRW9@NOG,12QQR@opiNOG,1CTXN@veNOG,KOG3656@euNOG	09XTM|9.4e-223|743.0	T	oxytocin receptor
g_913	9031.ENSGALP00000035438	4e-104	336.7	CAV3	GO:0000139,GO:0005575,GO:0005622,GO:0005623,GO:0005737,GO:0005794,GO:0005886,GO:0005901,GO:0012505,GO:0016020,GO:0031090,GO:0043226,GO:0043227,GO:0043229,GO:0043231,GO:0044422,GO:0044424,GO:0044425,GO:0044431,GO:0044444,GO:0044446,GO:0044459,GO:0044464,GO:0045121,GO:0071944	K12959		aveNOG[1]	04J29@aveNOG,0A3HE@biNOG,0DR4D@chorNOG,0IXSQ@euNOG,0VEC9@meNOG,121CB@NOG,13RHR@opiNOG,1D09H@veNOG	0IXSQ|8.1e-84|284.2	P	May act as a scaffolding protein within caveolar membranes. Interacts directly with G-protein alpha subunits and can functionally regulate their activity (By similarity)
g_915	9031.ENSGALP00000013575	1.6e-247	811.6	LMCD1				aveNOG[1]	04QQC@aveNOG,0B3J9@biNOG,0E7R3@chorNOG,0INGI@euNOG,0WFYS@meNOG,0ZPX3@NOG,13BM0@opiNOG,1DER4@veNOG	0INGI|2.1e-201|672.1	K	LIM and cysteine-rich domains 1
g_919	9593.ENSGGOP00000028620	2.9e-54	168.7					aveNOG[1]	09TPM@biNOG,0DFKD@chorNOG,0RSRT@homNOG,0UIMJ@maNOG,0V59W@meNOG,0XR6W@NOG,12RDB@opiNOG,169PR@prNOG,1AZNM@spriNOG,1CQA1@veNOG,KOG1056@euNOG	0RSRT|3.1e-48|168.2	W	Glutamate receptor, metabotropic 7
g_920	9986.ENSOCUP00000021043	6e-203	663.1					aveNOG[1]	09TPM@biNOG,0DFKD@chorNOG,0UIMJ@maNOG,0V59W@meNOG,0XR6W@NOG,12RDB@opiNOG,1AZNM@spriNOG,1CQA1@veNOG,KOG1056@euNOG	1AZNM|1.6e-230|771.4	T	Glutamate receptor, metabotropic 7
g_921	9669.ENSMPUP00000016949	4.9e-172	557.7					aveNOG[1]	09TPM@biNOG,0CNVZ@carNOG,0DFKD@chorNOG,0UIMJ@maNOG,0V59W@meNOG,0XR6W@NOG,12RDB@opiNOG,1CQA1@veNOG,KOG1056@euNOG	0CNVZ|1.2e-178|599.8	T	Glutamate receptor, metabotropic 7
g_922	9305.ENSSHAP00000007951	4.2e-107	346.4					aveNOG[1]	0A63V@biNOG,0DT9V@chorNOG,0UIUH@maNOG,0VGYH@meNOG,0XR6W@NOG,13QTG@opiNOG,1D2M8@veNOG,KOG1056@euNOG	0UIUH|2.4e-111|373.2	P, T	Receptor family ligand binding region
g_924	9606.ENSP00000256497	2.9e-227	743					aveNOG[1]	09WWU@biNOG,0DPYY@chorNOG,0RK5U@homNOG,0UKME@maNOG,0V7V4@meNOG,0XS6F@NOG,12Q68@opiNOG,164F8@prNOG,1AW3F@spriNOG,1CYYX@veNOG,KOG2429@euNOG	0RK5U|6.6e-232|775.0	G	ER degradation enhancer, mannosidase alpha-like 1
g_926	28377.ENSACAP00000012310	2.6e-23	76.8					aveNOG[1]	09TP9@biNOG,0DEZN@chorNOG,0V4NF@meNOG,0XNUK@NOG,12Q78@opiNOG,1CPPD@veNOG,KOG0075@euNOG	KOG0075|2.4e-14|56.7	U	ADP-ribosylation factor-like
g_928	9031.ENSGALP00000013509	4e-269	887.8	BHLHE40		K03729		aveNOG[1]	04EFJ@aveNOG,0A3M1@biNOG,0DR7U@chorNOG,0VEG1@meNOG,11F0X@NOG,13K2M@opiNOG,1D0D9@veNOG,KOG4304@euNOG	KOG4304|1.8e-34|123.0	K	Hairy and enhancer of split
g_930	9031.ENSGALP00000013490	0	1559.4	ITPR1		K04958		aveNOG[1]	04J8Z@aveNOG,09XKF@biNOG,0DIY2@chorNOG,0V8IA@meNOG,0XR97@NOG,12QKW@opiNOG,1CTPH@veNOG,KOG3533@euNOG	KOG3533|4.8e-230|770.7	T	inositol 1,4,5-trisphosphate receptor type
g_931	9103.ENSMGAP00000014513	3.1e-178	579.1					aveNOG[1]	0B6GK@biNOG,0E9JR@chorNOG,0ITRN@euNOG,0WJ71@meNOG,0ZW8Q@NOG,13G6P@opiNOG	0ITRN|1.7e-147|496.8	T	MIR domain
g_932	9103.ENSMGAP00000014513	1.4e-271	888.7					aveNOG[1]	0B6GK@biNOG,0E9JR@chorNOG,0ITRN@euNOG,0WJ71@meNOG,0ZW8Q@NOG,13G6P@opiNOG	0ITRN|1.7e-216|725.7	T	MIR domain
g_934	9103.ENSMGAP00000010386	9.2e-62	200.8			K13444		aveNOG[1]	04IHD@aveNOG,0A0QE@biNOG,0DKXM@chorNOG,0IEYZ@euNOG,0VB5A@meNOG,12T0S@opiNOG,1CX8R@veNOG,COG1262@NOG	0IEYZ|7.4e-43|150.9	S	sulfatase modifying factor 1
g_935	13735.ENSPSIP00000020014	4.4e-130	428.6					aveNOG[1]	09X72@biNOG,0DIPW@chorNOG,0V85N@meNOG,12QG0@opiNOG,1CYPA@veNOG,COG2940@NOG,KOG1082@euNOG	KOG1082|5.9e-69|236.8	B	Histone-lysine N-methyltransferase
g_941	59729.ENSTGUP00000010517	3e-250	816.9			K00974		aveNOG[1]	04N24@aveNOG,0A092@biNOG,0DMVU@chorNOG,0VB52@meNOG,12S1N@opiNOG,1CWRI@veNOG,COG0617@NOG,KOG2159@euNOG	04N24|1.7e-273|910.2	J	Poly A polymerase head domain
g_944	9031.ENSGALP00000013429	3e-294	962.2	CNTN4		K06762		aveNOG[1]	04F77@aveNOG,09X1D@biNOG,0DHM2@chorNOG,0V64Z@meNOG,0XSVG@NOG,12P91@opiNOG,1CT2J@veNOG,KOG3513@euNOG	04F77|4.8e-301|1005.0	T	Immunoglobulin V-set domain
g_945	9031.ENSGALP00000013429	9e-144	462.3	CNTN4		K06762		aveNOG[1]	04F77@aveNOG,09X1D@biNOG,0DHM2@chorNOG,0V64Z@meNOG,0XSVG@NOG,12P91@opiNOG,1CT2J@veNOG,KOG3513@euNOG	04F77|2.2e-114|387.1	T	Immunoglobulin V-set domain
g_947	9031.ENSGALP00000012826	0	1604.9	CHL1				aveNOG[1]	04F6I@aveNOG,09V5A@biNOG,0DGEG@chorNOG,0V64Z@meNOG,0XSVG@NOG,12P91@opiNOG,1CR3Y@veNOG,KOG3513@euNOG	04F6I|0.0|1610.5	T	cell adhesion molecule with homology to L1CAM (close homolog of L1)
g_951	59729.ENSTGUP00000010271	4.2e-159	515.5					aveNOG[1]	0APFN@biNOG,0E3CS@chorNOG,0W1SI@meNOG,0Z7YX@NOG,14F6X@opiNOG,1D2EQ@veNOG,KOG0297@euNOG	1D2EQ|1.1e-138|465.3	O	PDZ domain (Also known as DHR or GLGF)
g_953	9031.ENSGALP00000012678	0	1226.4	PDZRN3		K15682		aveNOG[1]	04JMM@aveNOG,09V06@biNOG,0DG9P@chorNOG,0V5ZY@meNOG,0YT6N@NOG,12PTE@opiNOG,1CQZ2@veNOG,KOG0297@euNOG,KOG0312@euNOG	04JMM|0.0|1321.7	O	PDZ domain containing RING finger 3
g_955	61853.ENSNLEP00000024119	3.9e-28	89.9					aveNOG[1]	0A9PN@biNOG,0DW1V@chorNOG,0JBVE@euNOG,0UWGZ@maNOG,0VKT6@meNOG,11A5X@NOG,144H2@opiNOG,1B7TV@spriNOG,1D5BU@veNOG	0JBVE|1.1e-50|176.7	S	gag gene protein p24 (core nucleocapsid protein)
g_961	13616.ENSMODP00000004805	5.6e-28	91.2					aveNOG[1]	0A2G5@biNOG,0DQ3B@chorNOG,0US3P@maNOG,0VDBY@meNOG,11PN1@NOG,12Z77@opiNOG,1CZ4B@veNOG,KOG4477@euNOG	KOG4477|5.9e-30|108.8	K	YY1 associated factor 2
g_963	9031.ENSGALP00000012612	5e-75	240.7	PROK2				aveNOG[1]	04PU4@aveNOG,0A89Q@biNOG,0DUVS@chorNOG,0J1F6@euNOG,0VJ5H@meNOG,11YK9@NOG,13VFA@opiNOG,1D46Q@veNOG	0J1F6|2.2e-51|176.2	T	Prokineticin 2
g_964	59729.ENSTGUP00000010239	4.2e-233	760.4	GPR27		K04300		aveNOG[1]	04K4C@aveNOG,09Z3W@biNOG,0DKJJ@chorNOG,0VA1A@meNOG,0XRW9@NOG,13KZQ@opiNOG,1CVDU@veNOG,KOG3656@euNOG	04K4C|1.7e-237|791.0	T	G protein-coupled receptor 27
g_978	9031.ENSGALP00000012514	7.3e-197	639.7					aveNOG[1]	04FH0@aveNOG,0A263@biNOG,0DRJI@chorNOG,0VEUZ@meNOG,13E00@opiNOG,1D0SP@veNOG,COG1028@NOG,KOG0725@euNOG,KOG1663@euNOG	04FH0|1.8e-202|677.7	Q	O-methyltransferase
g_979	8090.ENSORLP00000003861	5.1e-79	253					aveNOG[1]	0B6K0@biNOG,0DSTM@chorNOG,0KIFP@euNOG,0WE73@meNOG,14VGN@opiNOG,1D248@veNOG,COG0337@NOG	0KIFP|6.4e-113|379.3	E	3-dehydroquinate synthase
g_980	7897.ENSLACP00000008112	1.1e-22	68.5					aveNOG[1]	0ABZ6@biNOG,0J6IM@euNOG,0VP2N@meNOG,0Y4PV@NOG,13ZD6@opiNOG	0J6IM|7.8e-14|55.6	K	transcription factor
g_983	9103.ENSMGAP00000009807	2.3e-95	311.4	FRMD4B				aveNOG[1]	04MS4@aveNOG,09Y1E@biNOG,0DPGB@chorNOG,0VF1Q@meNOG,0XQFP@NOG,138F6@opiNOG,1D14D@veNOG,KOG3529@euNOG	KOG3529|2.6e-34|122.4	Z	domain containing
g_984	9103.ENSMGAP00000009807	0	1610.5	FRMD4B				aveNOG[1]	04MS4@aveNOG,09Y1E@biNOG,0DPGB@chorNOG,0VF1Q@meNOG,0XQFP@NOG,138F6@opiNOG,1D14D@veNOG,KOG3529@euNOG	KOG3529|1.3e-65|225.9	Z	domain containing
g_985	9031.ENSGALP00000029247	0	1157.3					aveNOG[1]	04P0I@aveNOG,09VIM@biNOG,0DGTB@chorNOG,0V6HV@meNOG,0YAHM@NOG,13HBZ@opiNOG,1CRHD@veNOG,KOG3735@euNOG	KOG3735|5.5e-160|537.9	Z	tropomodulin
g_986	9031.ENSGALP00000028073	1.6e-37	121.3	ARL6IP5	GO:0005575,GO:0005622,GO:0005623,GO:0005737,GO:0005783,GO:0005789,GO:0006810,GO:0006811,GO:0006820,GO:0006835,GO:0006865,GO:0008150,GO:0012505,GO:0015711,GO:0015800,GO:0015807,GO:0015813,GO:0015849,GO:0016020,GO:0031090,GO:0042175,GO:0043226,GO:0043227,GO:0043229,GO:0043231,GO:0044422,GO:0044424,GO:0044425,GO:0044432,GO:0044444,GO:0044446,GO:0044464,GO:0044699,GO:0044765,GO:0046942,GO:0051179,GO:…			aveNOG[1]	04EFP@aveNOG,09ZXU@biNOG,0DMGU@chorNOG,0VAUG@meNOG,11MUC@NOG,13RGB@opiNOG,1CWC3@veNOG,KOG4050@euNOG	KOG4050|4.3e-26|95.5	E, T	ADP-ribosylation-like factor 6 interacting protein 5
g_988	9031.ENSGALP00000021833	1.4e-276	910.2	TMF1				aveNOG[1]	04KFV@aveNOG,0A4AF@biNOG,0DRUH@chorNOG,0IGA0@euNOG,0VC9V@meNOG,0YE9Z@NOG,12TP1@opiNOG,1D130@veNOG	0IGA0|2.5e-137|463.3	K	TATA element modulatory factor 1
g_993	59729.ENSTGUP00000009937	1.1e-71	229.1					aveNOG[1]	0A3SG@biNOG,0E74N@chorNOG,0VC4N@meNOG,13P0D@opiNOG,1DE0W@veNOG,COG0477@NOG,KOG2504@euNOG	0A3SG|1.3e-66|228.9	G	monocarboxylate transporter 2-like
g_994	7955.ENSDARP00000017993	1.5e-34	106.8					aveNOG[1]	0A3SG@biNOG,0E74N@chorNOG,0NBX9@fiNOG,0VC4N@meNOG,13P0D@opiNOG,1DE0W@veNOG,COG0477@NOG,KOG2504@euNOG	0A3SG|3.2e-32|115.5	G	monocarboxylate transporter 2-like
g_998	9031.ENSGALP00000035449	4.7e-36	111.3	LRIG1				aveNOG[1]	04K2Q@aveNOG,0A0TG@biNOG,0DNET@chorNOG,0VBQ3@meNOG,12QDV@opiNOG,1CZRQ@veNOG,COG4886@NOG,KOG4194@euNOG	04K2Q|3.3e-15|58.5	T	leucine-rich repeats and immunoglobulin-like domains
g_999	9103.ENSMGAP00000009581	0	1908.5	LRIG1				aveNOG[1]	04K2Q@aveNOG,0A0TG@biNOG,0DNET@chorNOG,0VBQ3@meNOG,12QDV@opiNOG,1CZRQ@veNOG,COG4886@NOG,KOG4194@euNOG	04K2Q|0.0|1788.5	T	leucine-rich repeats and immunoglobulin-like domains
g_1001	10090.ENSMUSP00000086730	1.8e-44	145.4					aveNOG[1]	09UVE@biNOG,0DG4V@chorNOG,0UP66@maNOG,0V5V1@meNOG,12NZ3@opiNOG,18TYQ@roNOG,1AYRK@spriNOG,1CQUE@veNOG,COG5021@NOG,KOG3209@euNOG	KOG3209|1e-34|123.6	F	membrane associated guanylate kinase, WW and PDZ domain containing
g_1002	13735.ENSPSIP00000001037	1.2e-106	347.5					aveNOG[1]	0A7Y3@biNOG,0DUNI@chorNOG,0VIT8@meNOG,12PBX@opiNOG,1D3XX@veNOG,COG2801@NOG,KOG0017@euNOG	0DUNI|6.7e-121|408.4	L	Inherit from opiNOG: to reverse transcriptase
g_1005	9544.ENSMMUP00000039584	0	1511.5					aveNOG[1]	0B0JY@biNOG,0E5ZV@chorNOG,0KDJU@euNOG,0V1CZ@maNOG,0WD34@meNOG,0XNXK@NOG,14TSQ@opiNOG,1DCZ6@veNOG	0KDJU|0.0|1261.7	T	membrane associated guanylate kinase, WW and PDZ domain containing
g_1007	9031.ENSGALP00000011941	2e-149	482	ADAMTS9		K08624		aveNOG[1]	04HCT@aveNOG,09U5N@biNOG,0DJGU@chorNOG,0V69U@meNOG,0XPKZ@NOG,12PII@opiNOG,1CU9C@veNOG,KOG3538@euNOG	04HCT|5.9e-139|468.5	O	ADAM metallopeptidase with thrombospondin type 1 motif, 9
g_1008	9031.ENSGALP00000011941	0	2543.9	ADAMTS9		K08624		aveNOG[1]	04HCT@aveNOG,09U5N@biNOG,0DJGU@chorNOG,0V69U@meNOG,0XPKZ@NOG,12PII@opiNOG,1CU9C@veNOG,KOG3538@euNOG	04HCT|0.0|2511.6	O	ADAM metallopeptidase with thrombospondin type 1 motif, 9
g_1009	9031.ENSGALP00000011851	0	1938.7	PRICKLE2		K04511		aveNOG[1]	04EF8@aveNOG,09UH1@biNOG,0DFSV@chorNOG,0V5GC@meNOG,0XP0W@NOG,12TR2@opiNOG,1CQGB@veNOG,KOG1704@euNOG	04EF8|0.0|1938.7	T	prickle homolog 2 (Drosophila)
g_1010	9031.ENSGALP00000011822	1.3e-223	734.5	PSMD6		K03037		aveNOG[1]	04K98@aveNOG,09XA1@biNOG,0DIMG@chorNOG,0V88B@meNOG,12SJS@opiNOG,1CTCC@veNOG,COG5187@NOG,KOG0687@euNOG	KOG0687|6.2e-170|571.2	O	Proteasome (Prosome, macropain) 26S subunit, non-ATPase, 6
g_1012	10141.ENSCPOP00000002656	4.2e-33	102.3					aveNOG[1]	0B0UF@biNOG,0E676@chorNOG,0KDUJ@euNOG,0V1JA@maNOG,0WDC0@meNOG,1243H@NOG,14U1X@opiNOG,196X0@roNOG,1BAAS@spriNOG,1DD6G@veNOG	0KDUJ|3.6e-26|95.4	B	ataxin 7
g_1015	9103.ENSMGAP00000009321	1.4e-91	294.6		GO:0005575,GO:0005622,GO:0005623,GO:0005929,GO:0042995,GO:0043226,GO:0043227,GO:0043229,GO:0043231,GO:0044424,GO:0044464			aveNOG[1]	04PPQ@aveNOG,0A6WX@biNOG,0DTSI@chorNOG,0IX65@euNOG,0VHN1@meNOG,116AU@NOG,13T7W@opiNOG,1D37I@veNOG	0IX65|9.8e-66|224.3	S	sentan, cilia apical structure protein
g_1016	9031.ENSGALP00000032758	1.4e-153	501.5	SYNPR				aveNOG[1]	04NH6@aveNOG,09T87@biNOG,0DEJF@chorNOG,0IDYC@euNOG,0V477@meNOG,11J4N@NOG,12N3N@opiNOG,1CP9A@veNOG	0IDYC|1.5e-109|369.4	U	synaptoporin
g_1019	8083.ENSXMAP00000013671	5.1e-41	129.6					aveNOG[1]	0B44I@biNOG,0E83U@chorNOG,0IPPG@euNOG,0WGKK@meNOG,11G6V@NOG,13CK9@opiNOG,1DF2Y@veNOG	0IPPG|7e-35|124.6	T	NA
g_1020	7897.ENSLACP00000011408	3.4e-73	231.9					aveNOG[1]	0B44I@biNOG,0E83U@chorNOG,0IPPG@euNOG,0WGKK@meNOG,11G6V@NOG,13CK9@opiNOG,1DF2Y@veNOG	0IPPG|8.1e-70|240.0	T	NA
g_1021	9031.ENSGALP00000035457	8.6e-92	298.1					aveNOG[1]	04NER@aveNOG,09VNY@biNOG,0DK44@chorNOG,0V6MU@meNOG,0Y0FD@NOG,12PDY@opiNOG,1CUXW@veNOG,KOG3543@euNOG	KOG3543|3.5e-80|274.0	T	Ca -dependent secretion activator
g_1022	9103.ENSMGAP00000009286	1.1e-72	235.5					aveNOG[1]	0Y0FD@NOG,KOG3543@euNOG	KOG3543|1.9e-51|178.8	T	Ca -dependent secretion activator
g_1024	7897.ENSLACP00000014424	1e-61	194.3					aveNOG[1]	0B44H@biNOG,0IPPF@euNOG,0WGKJ@meNOG,0YNUF@NOG,13CK8@opiNOG	0IPPF|3.7e-65|223.7	T	NA
g_1026	9103.ENSMGAP00000009152	1e-227	743.8					aveNOG[1]	0ADAZ@biNOG,0DY5W@chorNOG,0VQHT@meNOG,142TR@opiNOG,1D72J@veNOG,COG5048@NOG,KOG1721@euNOG	0ADAZ|2.3e-233|777.7	K	fez family zinc finger
g_1031	10020.ENSDORP00000007210	0	1342.3					aveNOG[1]	09ZEP@biNOG,0DKX0@chorNOG,0USBH@maNOG,0V9ZZ@meNOG,12SQH@opiNOG,1915X@roNOG,1B176@spriNOG,1CVS8@veNOG,COG3338@NOG,COG5599@NOG,KOG0382@euNOG,KOG0789@euNOG	1915X|0.0|1527.8	T	protein tyrosine phosphatase, receptor type, G
g_1032	9103.ENSMGAP00000009120	4.9e-158	511.9	PTPRG	GO:0005575,GO:0016020	K16667		aveNOG[1]	04K6Z@aveNOG,09ZEP@biNOG,0DKX0@chorNOG,0V9ZZ@meNOG,12SQH@opiNOG,1CVS8@veNOG,COG3338@NOG,COG5599@NOG,KOG0382@euNOG,KOG0789@euNOG	04K6Z|1e-126|428.3	T	protein tyrosine phosphatase, receptor type, G
g_1037	9103.ENSMGAP00000009067	4.4e-145	472.5	FAM3D	GO:0002791,GO:0002792,GO:0008150,GO:0010646,GO:0023051,GO:0032879,GO:0046676,GO:0046883,GO:0046888,GO:0048519,GO:0048523,GO:0050789,GO:0050794,GO:0050796,GO:0051046,GO:0051048,GO:0051049,GO:0051051,GO:0060341,GO:0065007,GO:0090087,GO:0090276,GO:0090278			aveNOG[1]	04IRF@aveNOG,09ZN8@biNOG,0DM5Y@chorNOG,0IJP8@euNOG,0VAIX@meNOG,0Y9GG@NOG,13G8Z@opiNOG,1CW13@veNOG	0IJP8|1.4e-109|369.0	U	Family with sequence similarity 3, member D
g_1038	9031.ENSGALP00000011549	1.3e-67	218.7	FAM107A				aveNOG[1]	04P8M@aveNOG,0A6NF@biNOG,0DTN4@chorNOG,0IX5W@euNOG,0VHGI@meNOG,11Z4D@NOG,13RK5@opiNOG,1D2ZP@veNOG	0IX5W|1e-55|191.2	S	Family with sequence similarity 107, member A
g_1039	9031.ENSGALP00000011541	1.6e-288	944.3	ACOX2		K10214		aveNOG[1]	04I53@aveNOG,09W20@biNOG,0DHMU@chorNOG,0V7AZ@meNOG,12PUD@opiNOG,1CSC9@veNOG,COG1960@NOG,KOG0136@euNOG	04I53|1.3e-295|986.1	I	acyl-CoA oxidase 2, branched chain
g_1040	9031.ENSGALP00000011504	4.1e-171	553.7	KCTD6				aveNOG[1]	04F4W@aveNOG,09W94@biNOG,0DHIF@chorNOG,0V77F@meNOG,0Z155@NOG,12PSR@opiNOG,1CS8P@veNOG,KOG2723@euNOG	04F4W|1.6e-173|578.3	S	potassium channel tetramerisation domain containing 6
g_1042	9031.ENSGALP00000011491	1e-242	798.7	PDHB		K00162		aveNOG[1]	04MZ5@aveNOG,09VBD@biNOG,0DGJV@chorNOG,0V5PZ@meNOG,12NW3@opiNOG,1CR9Q@veNOG,COG0022@NOG,KOG0524@euNOG	KOG0524|1.3e-224|753.0	C	Pyruvate dehydrogenase
g_1044	28377.ENSACAP00000011629	1.8e-49	158.8					aveNOG[1]	0A6VJ@biNOG,0DUH9@chorNOG,0IXUB@euNOG,0VIJZ@meNOG,12ADM@NOG,13RJ1@opiNOG,1D36C@veNOG	0IXUB|5.9e-45|155.6	A	Ribonuclease P MRP 14kDa subunit
g_1047	9031.ENSGALP00000011290	2.6e-92	300.8	SLC25A20		K15109		aveNOG[1]	04P0D@aveNOG,09XMD@biNOG,0DIYV@chorNOG,0V8J2@meNOG,0XS86@NOG,12QM4@opiNOG,1CTQB@veNOG,KOG0758@euNOG	KOG0758|1.6e-37|132.7	C	Solute carrier family 25
g_1049	9483.ENSCJAP00000044197	4.4e-49	154.2					aveNOG[1]	09TZN@biNOG,0DF9J@chorNOG,0UPPG@maNOG,0V4YH@meNOG,0XP9Y@NOG,12QNE@opiNOG,16573@prNOG,1ASAW@spriNOG,1CPZ6@veNOG,KOG1815@euNOG	16573|5.7e-54|187.6	O	ariadne homolog 2 (Drosophila)
g_1051	9103.ENSMGAP00000008803	1.4e-214	698.5		GO:0000003,GO:0001944,GO:0003006,GO:0003674,GO:0004871,GO:0004872,GO:0004888,GO:0005488,GO:0005515,GO:0005575,GO:0005622,GO:0005623,GO:0005737,GO:0005886,GO:0007154,GO:0007165,GO:0007166,GO:0007275,GO:0007399,GO:0007417,GO:0007420,GO:0007548,GO:0008150,GO:0008406,GO:0009790,GO:0009987,GO:0016020,GO:0016055,GO:0017147,GO:0019904,GO:0022414,GO:0023052,GO:0030165,GO:0032501,GO:0032502,GO:0038023,GO:…			aveNOG[1]	04J3Q@aveNOG,0A3DM@biNOG,0DR16@chorNOG,0VE8I@meNOG,0XRC8@NOG,13H6Z@opiNOG,1CTMT@veNOG,KOG3577@euNOG	04J3Q|6e-216|719.2	T	FRI
g_1052	9103.ENSMGAP00000008783	2.4e-250	825.8					aveNOG[1]	09X5J@biNOG,0DIGM@chorNOG,0V843@meNOG,0XS5J@NOG,13JJW@opiNOG,1CT75@veNOG,KOG1591@euNOG	KOG1591|7.2e-56|193.4	E	prolyl 4-hydroxylase
g_1053	9103.ENSMGAP00000008773	0	1312.8	WDR6				aveNOG[1]	04FHN@aveNOG,0A18D@biNOG,0DNW4@chorNOG,0VC42@meNOG,0ZJ6J@NOG,12TH7@opiNOG,1CXTJ@veNOG,KOG0974@euNOG	KOG0974|6.8e-208|697.2	O	WD repeat domain 6
g_1054	13735.ENSPSIP00000005913	3.1e-134	436.4					aveNOG[1]	0B1MY@biNOG,0E6TE@chorNOG,0JP1X@euNOG,0W2F7@meNOG,112YZ@NOG,14DFV@opiNOG,1DDR3@veNOG	0JP1X|1.5e-112|380.1	S	DALR anticodon binding domain containing 3
g_1056	28377.ENSACAP00000012190	1.8e-73	241.3					aveNOG[1]	09ZFG@biNOG,0DKY0@chorNOG,0VACH@meNOG,11J7F@NOG,13TPD@opiNOG,1CVT0@veNOG,KOG3363@euNOG	KOG3363|4.4e-52|181.1	J	NADH dehydrogenase (ubiquinone) complex I, assembly factor 3
g_1057	9601.ENSPPYP00000020165	1.1e-281	922.3					aveNOG[1]	0B0KD@biNOG,0E609@chorNOG,0KDKB@euNOG,0V1DE@maNOG,0WD3M@meNOG,14TT8@opiNOG,1BA64@spriNOG,1DCZK@veNOG,COG0517@NOG	0KDKB|3.7e-285|950.7	F	Catalyzes the conversion of inosine 5'-phosphate (IMP) to xanthosine 5'-phosphate (XMP), the first committed and rate- limiting step in the de novo synthesis of guanine nucleotides, and therefore plays an important role in the regulation of cell growth. Could also have a single-stranded nucleic acid-binding activity and could play a role in RNA and or DNA metabolism. It may also have a role in th…
g_1058	9031.ENSGALP00000011107	0	1696.3	QRICH1				aveNOG[1]	04HU3@aveNOG,0APGC@biNOG,0DM3T@chorNOG,0IE8I@euNOG,0W1T9@meNOG,0XQR6@NOG,12QSK@opiNOG,1CVYV@veNOG	0IE8I|3.9e-167|561.3	S	zinc finger, MYM-type
g_1061	59729.ENSTGUP00000009214	0	1556.6					aveNOG[1]	04G98@aveNOG,09XX1@biNOG,0DJD8@chorNOG,0V8UK@meNOG,12NKE@opiNOG,1CU5H@veNOG,COG0008@NOG,KOG1148@euNOG	KOG1148|0.0|1199.3	J	Glutaminyl-trna synthetase
g_1062	7897.ENSLACP00000000758	3.9e-95	306.9					aveNOG[1]	0AADI@biNOG,0DW5N@chorNOG,0J2IF@euNOG,0VMBP@meNOG,0YN6C@NOG,13W9X@opiNOG,1D5FK@veNOG	0J2IF|3.2e-109|368.8	S	NA
g_1063	9103.ENSMGAP00000008301	0	1176.6					aveNOG[1]	04NWK@aveNOG,09U0F@biNOG,0DJXN@chorNOG,0V4BE@meNOG,12NMW@opiNOG,1CUR5@veNOG,COG0733@NOG,KOG3659@euNOG	04NWK|0.0|1233.6	P	Sodium:neurotransmitter symporter family
g_1064	9103.ENSMGAP00000008268	0	2952					aveNOG[1]	04GKH@aveNOG,09UA9@biNOG,0DISY@chorNOG,0V59F@meNOG,12QDF@opiNOG,1CTI7@veNOG,COG5560@NOG,KOG1870@euNOG	04GKH|0.0|3092.3	O	Ubiquitin carboxyl-terminal hydrolase
g_1066	9103.ENSMGAP00000008260	0	3895					aveNOG[1]	04N9G@aveNOG,09UG2@biNOG,0DN12@chorNOG,0V5FE@meNOG,0XPEG@NOG,12QDN@opiNOG,1CWX8@veNOG,KOG0994@euNOG	04N9G|0.0|3904.5	W	laminin, beta 2 (laminin S)
g_1067	9031.ENSGALP00000035462	0	2314.1					aveNOG[1]	04N9G@aveNOG,09UG2@biNOG,0DN12@chorNOG,0V5FE@meNOG,0XPEG@NOG,12QDN@opiNOG,1CWX8@veNOG,KOG0994@euNOG	0DN12|0.0|2342.6	W	laminin beta
g_1069	9031.ENSGALP00000010960	2.9e-234	766.7					aveNOG[1]	09W51@biNOG,0DHE7@chorNOG,0II1W@euNOG,0V73C@meNOG,104Z6@NOG,13N3H@opiNOG,1CS49@veNOG	0II1W|1.1e-93|318.6	S	NA
g_1071	400682.PAC_15725486	6.1e-35	114					aveNOG[1]	0VD4Q@meNOG,0XNX8@NOG,12VIY@opiNOG,KOG4441@euNOG	12VIY|2.5e-84|287.4	T	Kelch-like 18 (Drosophila)
g_1073	28377.ENSACAP00000020465	1.3e-96	315.4					aveNOG[1]	0A2F8@biNOG,0DQ2D@chorNOG,0IF5P@euNOG,0VDB1@meNOG,0ZJ6U@NOG,13NES@opiNOG,1CPS8@veNOG	0IF5P|4.8e-114|386.5	S	proline-rich transmembrane protein 3
g_1074	28377.ENSACAP00000008446	8.2e-232	763.3					aveNOG[1]	09W25@biNOG,0DHB5@chorNOG,0V70A@meNOG,107X2@NOG,12PRA@opiNOG,1CS18@veNOG,KOG4260@euNOG	KOG4260|1.2e-127|431.3	L	cysteine-rich with egf-like domains
g_1075	9103.ENSMGAP00000006096	6e-159	521.8					aveNOG[1]	09XK3@biNOG,0DIXT@chorNOG,0IES9@euNOG,0V8I1@meNOG,11MUJ@NOG,13I04@opiNOG,1CTP8@veNOG	0IES9|4.6e-154|518.2	T	Interleukin 17 receptor C
g_1076	28377.ENSACAP00000008482	9e-172	563.9					aveNOG[1]	0A0A6@biNOG,0DQH4@chorNOG,0IFAR@euNOG,0VDQQ@meNOG,0XTAY@NOG,12Q6Q@opiNOG,1CZJA@veNOG	0IFAR|2.1e-193|648.3	T	interleukin 17 receptor E
g_1077	9103.ENSMGAP00000008663	3.3e-124	403.9					aveNOG[1]	04K0P@aveNOG,0A2G2@biNOG,0DMZZ@chorNOG,0VDBV@meNOG,11GU8@NOG,13Q9E@opiNOG,1CX0Q@veNOG,KOG4054@euNOG	KOG4054|1.2e-73|251.0	U	jagunal homolog 1 (Drosophila)
g_1078	59729.ENSTGUP00000009006	3.3e-106	350.3					aveNOG[1]	0A1KQ@biNOG,0DP8W@chorNOG,0VCGB@meNOG,13P8Z@opiNOG,1CY6W@veNOG,COG0564@NOG,KOG1919@euNOG	KOG1919|3.3e-23|85.8	A	RNA pseudouridylate synthase domain containing
g_1079	9103.ENSMGAP00000018201	1.1e-291	965.1					aveNOG[1]	04M9I@aveNOG,09XNV@biNOG,0DKU2@chorNOG,0V63Q@meNOG,0XQDM@NOG,12QN6@opiNOG,1CYRU@veNOG,KOG2157@euNOG	KOG2157|2e-109|370.4	O	Tubulin tyrosine ligase-like family, member
g_1080	8083.ENSXMAP00000001820	1.4e-107	350.1					aveNOG[1]	09UM9@biNOG,0DR4W@chorNOG,0N2JE@fiNOG,0V5KT@meNOG,11G2F@NOG,135ZF@opiNOG,1D0A4@veNOG,KOG1876@euNOG	KOG1876|5.1e-113|382.6	Z	protein 2 3 complex subunit
g_1081	9031.ENSGALP00000010797	3e-289	952	TADA3		K11315		aveNOG[1]	04ER2@aveNOG,09TGY@biNOG,0DETS@chorNOG,0V4FX@meNOG,0XQUH@NOG,12TIZ@opiNOG,1CPHI@veNOG,KOG4191@euNOG	KOG4191|2.9e-116|393.5	B	transcriptional adaptor 3
g_1083	9103.ENSMGAP00000008587	7e-223	726.3					aveNOG[1]	04NHK@aveNOG,09X5B@biNOG,0DH1M@chorNOG,0V83X@meNOG,0XRMJ@NOG,12N56@opiNOG,1CUAQ@veNOG,KOG0032@euNOG	04NHK|1.1e-231|771.3	T	calcium calmodulin-dependent protein kinase
g_1084	9103.ENSMGAP00000008551	3.7e-220	717.6	OGG1		K03660		aveNOG[1]	04H56@aveNOG,09ZPE@biNOG,0DM79@chorNOG,0VAK4@meNOG,12Q7U@opiNOG,1CW2C@veNOG,COG0122@NOG,KOG2875@euNOG	04H56|1.9e-210|701.1	L	8-oxoguanine DNA glycosylase, N-terminal domain
g_1085	9103.ENSMGAP00000008535	0	2758.8	BRPF1		K11348		aveNOG[1]	04KJW@aveNOG,09U46@biNOG,0DFDT@chorNOG,0V538@meNOG,12NIC@opiNOG,1CS3B@veNOG,COG5076@NOG,COG5141@NOG,KOG0955@euNOG	KOG0955|3e-122|412.6	B, K	Bromodomain and PHD finger containing
g_1086	59729.ENSTGUP00000008853	0	1147					aveNOG[1]	09T4Y@biNOG,0DH8P@chorNOG,0V43Q@meNOG,0XPC8@NOG,12Q7Z@opiNOG,1CRIQ@veNOG,KOG1327@euNOG	KOG1327|1.5e-152|512.4	T	copine family
g_1087	43179.ENSSTOP00000001826	1.9e-57	181.1					aveNOG[1]	0AQQE@biNOG,0E74F@chorNOG,0KG7I@euNOG,0V24G@maNOG,0W38N@meNOG,10SJY@NOG,12XID@opiNOG,1BAI4@spriNOG,1DE0Q@veNOG	0KG7I|8.4e-59|203.5	S	NA
g_1088	30608.ENSMICP00000013859	6.6e-238	777.3					aveNOG[1]	0AQQE@biNOG,0E74F@chorNOG,0KG7I@euNOG,0V24G@maNOG,0W38N@meNOG,10SJY@NOG,12XID@opiNOG,1BAI4@spriNOG,1DE0Q@veNOG	0KG7I|6.7e-271|904.3	S	NA
g_1090	9103.ENSMGAP00000008420	3.9e-148	481.3					aveNOG[1]	04GV3@aveNOG,09US2@biNOG,0DG1M@chorNOG,0V5RI@meNOG,0XSUB@NOG,12PYU@opiNOG,1CQR7@veNOG,KOG4026@euNOG	04GV3|1.1e-151|506.7	U	Lipoma HMGIC fusion partner-like protein
g_1091	9103.ENSMGAP00000008050	0	1028	SETD5				aveNOG[1]	04QP0@aveNOG,0B395@biNOG,0E7JJ@chorNOG,0IMXD@euNOG,0WFM8@meNOG,0ZTNX@NOG,13B62@opiNOG,1DEK1@veNOG	0IMXD|6.5e-189|634.7	S	SET domain containing 5
g_1092	9031.ENSGALP00000010604	0	1180.7	SETD5				aveNOG[1]	04QP0@aveNOG,0B395@biNOG,0E7JJ@chorNOG,0IMXD@euNOG,0WFM8@meNOG,0ZTNX@NOG,13B62@opiNOG,1DEK1@veNOG	0IMXD|0.0|1138.3	S	SET domain containing 5
g_1095	9031.ENSGALP00000010558	4.2e-250	816.4	SRPK3				aveNOG[1]	04N0Y@aveNOG,0A5BS@biNOG,0DQEP@chorNOG,0V5BR@meNOG,0XRBH@NOG,12N4I@opiNOG,1D20Z@veNOG,KOG1290@euNOG	04N0Y|1.4e-250|834.1	T	STYKc
g_1096	13735.ENSPSIP00000015237	0	1573.7					aveNOG[1]	0B3BP@biNOG,0E7M0@chorNOG,0IN3E@euNOG,0WFQ8@meNOG,1131Q@NOG,13B9Y@opiNOG,1DEMD@veNOG	0IN3E|0.0|1979.9	T	Plexin B2
g_1101	9031.ENSGALP00000010397	0	1877.8					aveNOG[1]	04R1S@aveNOG,0B66T@biNOG,0E9CI@chorNOG,0WIWH@meNOG,0XSUX@NOG,13FU0@opiNOG,1DG7W@veNOG,KOG3528@euNOG	04R1S|0.0|1956.3	T	glutamate receptor interacting protein 2
g_1102	59729.ENSTGUP00000008616	1.9e-145	469.3			K05039		aveNOG[1]	04M1U@aveNOG,09U0F@biNOG,0DHIB@chorNOG,0V4BE@meNOG,12NMW@opiNOG,1CS8J@veNOG,COG0733@NOG,KOG3659@euNOG	04M1U|6.7e-142|478.1	P	Sodium:neurotransmitter symporter family
g_1105	9103.ENSMGAP00000007912	0	1798.2					aveNOG[1]	04KKD@aveNOG,09WBG@biNOG,0DHKR@chorNOG,0V79R@meNOG,12PU7@opiNOG,1CSB6@veNOG,COG5535@NOG,KOG2179@euNOG	KOG2179|7.4e-200|669.9	L	DNA repair protein
g_1107	13735.ENSPSIP00000013688	1.6e-127	417.6					aveNOG[1]	0A23D@biNOG,0DPRD@chorNOG,0VBWY@meNOG,0XPEG@NOG,12QD3@opiNOG,1CYQP@veNOG,KOG0994@euNOG	KOG0994|1.2e-45|159.0	W	laminin beta
g_1109	59729.ENSTGUP00000017850	1.1e-283	929.6	ZXDC				aveNOG[1]	04JT0@aveNOG,09X52@biNOG,0DIG1@chorNOG,0V83J@meNOG,12TGT@opiNOG,1CT6P@veNOG,COG5048@NOG,KOG1721@euNOG	04JT0|2.3e-296|989.1	K	ZXD family zinc finger C
g_1110	9031.ENSGALP00000010107	1.5e-123	402.9					aveNOG[1]	04EPW@aveNOG,09WBV@biNOG,0DHM6@chorNOG,0IFH9@euNOG,0V64M@meNOG,0YEAI@NOG,13HEQ@opiNOG,1CVRM@veNOG	0IFH9|6.4e-82|279.8	S	coiledcoil domain containing
g_1111	10141.ENSCPOP00000004779	5.3e-44	136.2					aveNOG[1]	09ZFU@biNOG,0DKYE@chorNOG,0UTYX@maNOG,0VACX@meNOG,12TNQ@opiNOG,194MN@roNOG,1B4IY@spriNOG,1CVTD@veNOG,COG5048@NOG,KOG1721@euNOG	194MN|1.3e-42|150.6	K	Kruppel-like factor 15
g_1113	13735.ENSPSIP00000008883	4e-45	147					aveNOG[1]	09T9D@biNOG,0DM6J@chorNOG,0V48E@meNOG,0XSTG@NOG,12WX9@opiNOG,1CW1T@veNOG,KOG3788@euNOG	KOG3788|3.5e-13|52.8	P	solute carrier family 41 member
g_1114	9103.ENSMGAP00000007739	6.2e-297	978.3			K15122		aveNOG[1]	04I2H@aveNOG,09T9D@biNOG,0DM6J@chorNOG,0V48E@meNOG,0XSTG@NOG,12WX9@opiNOG,1CW1T@veNOG,KOG3788@euNOG	KOG3788|7.3e-208|695.5	P	solute carrier family 41 member
g_1115	9103.ENSMGAP00000007696	4.4e-212	697.7					aveNOG[1]	04JUQ@aveNOG,09YUJ@biNOG,0DK9A@chorNOG,0V9SF@meNOG,11GJR@NOG,13PP8@opiNOG,1CYCV@veNOG,KOG4651@euNOG	KOG4651|1.1e-99|337.8	M, W	Carbohydrate
g_1117	9031.ENSGALP00000009979	2.2e-26	87.7	TXNRD3		K00384		aveNOG[1]	04M4I@aveNOG,09UWI@biNOG,0DKK6@chorNOG,0V5W9@meNOG,12PHT@opiNOG,1CVEN@veNOG,COG1249@NOG,KOG1752@euNOG,KOG4716@euNOG	KOG1752|6.2e-06|28.4	O	GLutaRedoXin
g_1118	9305.ENSSHAP00000008438	0	2231.5					aveNOG[1]	0B3BK@biNOG,0E7KX@chorNOG,0IN3A@euNOG,0V2QW@maNOG,0WFQ5@meNOG,0ZA1D@NOG,13B9V@opiNOG,1DEMA@veNOG	0IN3A|0.0|2347.6	T	Plexin A2
g_1119	9305.ENSSHAP00000008438	3.2e-171	559.5					aveNOG[1]	0B3BK@biNOG,0E7KX@chorNOG,0IN3A@euNOG,0V2QW@maNOG,0WFQ5@meNOG,0ZA1D@NOG,13B9V@opiNOG,1DEMA@veNOG	0IN3A|2.1e-171|575.7	T	Plexin A2
g_1121	9031.ENSGALP00000009751	2e-79	257.2					aveNOG[1]	04Q0G@aveNOG,09Y5W@biNOG,0DJJ6@chorNOG,0V93F@meNOG,126BR@NOG,13R28@opiNOG,1CUBU@veNOG,KOG4083@euNOG	KOG4083|8.5e-25|91.8	K	coiled-coil-helix-coiled-coil-helix domain containing
g_1122	9103.ENSMGAP00000007581	1.7e-249	819.7					aveNOG[1]	09X98@biNOG,0DPZW@chorNOG,0VDEY@meNOG,0XRXY@NOG,13IUE@opiNOG,1CQ1H@veNOG,KOG4536@euNOG	KOG4536|4.5e-164|550.5	S	transmembrane protein, adipocyte asscociated 1
g_1123	43151.ADAR001993-PA	0	1209.3					aveNOG[1]	0A0AA@biNOG,0VB69@meNOG,12NMS@opiNOG,COG1241@NOG,KOG0477@euNOG,KOG2652@euNOG	KOG2652|0.0|1299.3	K	Transcription factor
g_1125	9031.ENSGALP00000035470	2.6e-165	539.8	PODXL2				aveNOG[1]	04J6F@aveNOG,0A3JI@biNOG,0DF9E@chorNOG,0IFKB@euNOG,0VEEP@meNOG,0YCG4@NOG,13KVV@opiNOG,1CPZ0@veNOG	0IFKB|2.1e-103|351.5	T	podocalyxin-like
g_1126	9031.ENSGALP00000009637	0	1040.1	ABTB1		K10520		aveNOG[1]	04I2F@aveNOG,09X8V@biNOG,0DIKB@chorNOG,0V87D@meNOG,12QYM@opiNOG,1CTB4@veNOG,COG0666@NOG,KOG0511@euNOG	KOG0511|1.3e-147|497.2	S	ankyrin repeat and BTB POZ
g_1127	9103.ENSMGAP00000007456	1.8e-71	232	MGLL				aveNOG[1]	04GTE@aveNOG,0A3FI@biNOG,0DR2P@chorNOG,0VCRD@meNOG,13IVA@opiNOG,1CPVV@veNOG,COG2267@NOG,KOG1455@euNOG	KOG1455|3.5e-27|97.5	I	Monoglyceride lipase
g_1132	59729.ENSTGUP00000008145	9.6e-55	178.4	EEFSEC		K03833		aveNOG[1]	04FZR@aveNOG,09WHP@biNOG,0DHSZ@chorNOG,0V7G8@meNOG,12PY4@opiNOG,1CSHA@veNOG,COG3276@NOG,KOG0461@euNOG	KOG0461|1.8e-48|169.3	J	Elongation factor
g_1133	10090.ENSMUSP00000015197	1.5e-188	614.6					aveNOG[1]	09UPP@biNOG,0DKQ2@chorNOG,0UPQK@maNOG,0VA58@meNOG,12SEE@opiNOG,18XGG@roNOG,1AZCV@spriNOG,1CVIK@veNOG,COG5641@NOG,KOG1601@euNOG	18XGG|3.1e-189|633.6	K	GATA binding protein 2
g_1138	9031.ENSGALP00000009487	0	1326.5	RPN1		K12666		aveNOG[1]	04J3B@aveNOG,09Y2M@biNOG,0DJFI@chorNOG,0V902@meNOG,0XQVZ@NOG,12QWE@opiNOG,1CU81@veNOG,KOG2291@euNOG	KOG2291|3.8e-168|565.5	O	ribophorin I
g_1140	9031.ENSGALP00000009481	2.2e-141	463	RAB7A		K07897		aveNOG[1]	04FCS@aveNOG,09VB9@biNOG,0DGJQ@chorNOG,0V6AJ@meNOG,0XNZV@NOG,12P7A@opiNOG,1CR9K@veNOG,KOG0394@euNOG	KOG0394|1.1e-112|381.8	U	member RAS oncogene family
g_1142	9031.ENSGALP00000032982	6.8e-107	351.2					aveNOG[1]	0A6RX@biNOG,0DTRG@chorNOG,0VHJW@meNOG,12541@NOG,13R85@opiNOG,1D33F@veNOG,KOG4012@euNOG	KOG4012|8.1e-23|85.3	B	Histone cluster 1
g_1143	28377.ENSACAP00000021537	7.9e-79	256.6					aveNOG[1]	0A7F9@biNOG,0DTT0@chorNOG,0VI9V@meNOG,13R2C@opiNOG,1D327@veNOG,COG5262@NOG,KOG1756@euNOG	0VI9V|7.4e-99|335.9	B	Histone H2A
g_1144	9031.ENSGALP00000009476	7.2e-230	755.4					aveNOG[1]	04NEN@aveNOG,0A1QW@biNOG,0DPCX@chorNOG,0VCKF@meNOG,12U3Z@opiNOG,1CYAV@veNOG,COG2135@NOG,KOG2618@euNOG	KOG2618|7e-95|322.1	O	Chromosome 3 open reading frame 37
g_1145	9031.ENSGALP00000009420	0	1838.5	COPG	GO:0000139,GO:0005575,GO:0005622,GO:0005623,GO:0005737,GO:0005794,GO:0005798,GO:0012505,GO:0012506,GO:0016020,GO:0016023,GO:0030135,GO:0030137,GO:0030659,GO:0030660,GO:0030662,GO:0030663,GO:0031090,GO:0031410,GO:0031982,GO:0031988,GO:0043226,GO:0043227,GO:0043229,GO:0043231,GO:0044422,GO:0044424,GO:0044431,GO:0044433,GO:0044444,GO:0044446,GO:0044464	K17267		aveNOG[1]	04KTM@aveNOG,09V2N@biNOG,0DGBZ@chorNOG,0V629@meNOG,12NPK@opiNOG,1CR1F@veNOG,COG5240@NOG,KOG1078@euNOG	KOG1078|0.0|1372.0	U	The coatomer is a cytosolic protein complex that binds to dilysine motifs and reversibly associates with Golgi non- clathrin-coated vesicles, which further mediate biosynthetic protein transport from the ER, via the Golgi up to the trans Golgi network. Coatomer complex is required for budding from Golgi membranes, and is essential for the retrograde Golgi-to-ER transport of dilysine-tagged protei…
g_1147	9103.ENSMGAP00000007193	0	5169.7					aveNOG[1]	04FXM@aveNOG,0A01U@biNOG,0DJPG@chorNOG,0VCUM@meNOG,0XNMM@NOG,13IM5@opiNOG,1CUGE@veNOG,KOG3544@euNOG	04FXM|0.0|5149.1	W	von Willebrand factor type A domain
g_1148	9031.ENSGALP00000009286	0	1053.8	UQCRC1				aveNOG[1]	04EEA@aveNOG,09X9R@biNOG,0DIM6@chorNOG,0V883@meNOG,12QEC@opiNOG,1CQSU@veNOG,COG0612@NOG,KOG0960@euNOG	04EEA|0.0|1070.2	C	cytochrome b-c1 complex subunit 1, mitochondrial-like
g_1149	9031.ENSGALP00000009191	0	1466.8					aveNOG[1]	04R01@aveNOG,0B5W0@biNOG,0E95A@chorNOG,0WIIV@meNOG,13FD0@opiNOG,1DG15@veNOG,COG0659@NOG,KOG0236@euNOG,KOG4289@euNOG	04R01|0.0|1518.1	T	Domain of unknown function (DUF3497)
g_1150	9031.ENSGALP00000009191	0	6255					aveNOG[1]	04R01@aveNOG,0B5W0@biNOG,0E95A@chorNOG,0WIIV@meNOG,13FD0@opiNOG,1DG15@veNOG,COG0659@NOG,KOG0236@euNOG,KOG4289@euNOG	04R01|0.0|6560.2	T	Domain of unknown function (DUF3497)
g_1152	9031.ENSGALP00000009151	0	1431.7	NCKIPSD				aveNOG[1]	04KQP@aveNOG,09TRE@biNOG,0DF1R@chorNOG,0V4QR@meNOG,0Y8WT@NOG,12NTF@opiNOG,1CPRI@veNOG,KOG4035@euNOG	KOG4035|1.7e-105|357.5	T, Z	NCK interacting protein with SH3 domain
g_1153	30611.ENSOGAP00000018598	7e-165	538.9					aveNOG[1]	0B40S@biNOG,0E81G@chorNOG,0IPES@euNOG,0V2ZZ@maNOG,0WGG0@meNOG,0XSMY@NOG,13CDT@opiNOG,1BAWI@spriNOG,1DF0S@veNOG	0IPES|2.9e-110|373.5	I, K, T	inositol
g_1156	10141.ENSCPOP00000001423	2.8e-195	637					aveNOG[1]	0AZZP@biNOG,0E5GV@chorNOG,0KCYT@euNOG,0V0ZA@maNOG,0WCG0@meNOG,0XZ30@NOG,14T4N@opiNOG,196RG@roNOG,1B9WU@spriNOG,1DCGS@veNOG	0KCYT|4.9e-189|631.4	S	abhydrolase domain containing 6
g_1158	9031.ENSGALP00000035475	1.5e-200	656.5	DNASE1L3				aveNOG[1]	04QM8@aveNOG,0B1AX@biNOG,0E6K1@chorNOG,0IHHA@euNOG,0WDW8@meNOG,0ZR9A@NOG,13I90@opiNOG,1DEVC@veNOG	0IHHA|2.9e-133|447.2	S	deoxyribonuclease
g_1159	31033.ENSTRUP00000007433	0	2444.6					aveNOG[1]	0AZSZ@biNOG,0E5B3@chorNOG,0KCRR@euNOG,0WC9A@meNOG,0XNS3@NOG,14SXE@opiNOG,1DCB5@veNOG	0KCRR|0.0|3164.7	Z	filamin A, alpha
g_1160	7222.FBpp0148160	1.8e-72	235.9					aveNOG[1]	032D1@artNOG,09TYR@biNOG,0GX6R@dipNOG,0HY7I@droNOG,0SR6M@inNOG,0V4XN@meNOG,12NFR@opiNOG,COG5069@NOG,KOG0518@euNOG,KOG3587@euNOG	KOG0518|1.3e-51|179.6	Z	Filamin C, gamma
g_1165	9606.ENSP00000311401	3e-60	190.7					aveNOG[1]	09ZBP@biNOG,0DMNU@chorNOG,0RV3D@homNOG,0UI2J@maNOG,0VAZA@meNOG,0XP3F@NOG,13HI3@opiNOG,16CPS@prNOG,1AZYC@spriNOG,1CWIA@veNOG,KOG2432@euNOG	0RV3D|8.1e-57|196.7	S	DENN MADD domain containing 6A
g_1168	9031.ENSGALP00000009004	0	1247.5	PDE12				aveNOG[1]	04JME@aveNOG,09WMW@biNOG,0DKRM@chorNOG,0V7KH@meNOG,12Q0P@opiNOG,1CVK7@veNOG,COG5239@NOG,KOG0620@euNOG	KOG0620|7.8e-111|375.5	K	CCR4-NOT transcription complex subunit
g_1181	9031.ENSGALP00000008673	3.5e-205	666.8	WNT5A	GO:0001654,GO:0002009,GO:0002072,GO:0002088,GO:0003408,GO:0005575,GO:0005576,GO:0005578,GO:0007275,GO:0007423,GO:0008150,GO:0009653,GO:0009790,GO:0009887,GO:0009888,GO:0016331,GO:0031012,GO:0031076,GO:0032501,GO:0032502,GO:0043010,GO:0044421,GO:0044699,GO:0044707,GO:0044767,GO:0048048,GO:0048513,GO:0048562,GO:0048568,GO:0048592,GO:0048593,GO:0048596,GO:0048598,GO:0048646,GO:0048729,GO:0048731,GO:…	K00444		aveNOG[1]	04IKU@aveNOG,09V80@biNOG,0DM2U@chorNOG,0V67H@meNOG,0XQZ1@NOG,12R4V@opiNOG,1CVXW@veNOG,KOG3913@euNOG	04IKU|6.3e-206|687.7	T	Ligand for members of the frizzled family of seven transmembrane receptors (By similarity)
g_1184	13735.ENSPSIP00000001037	6.5e-111	361.2					aveNOG[1]	0A7Y3@biNOG,0DUNI@chorNOG,0VIT8@meNOG,12PBX@opiNOG,1D3XX@veNOG,COG2801@NOG,KOG0017@euNOG	0DUNI|5.7e-123|415.3	L	Inherit from opiNOG: to reverse transcriptase
g_1187	9031.ENSGALP00000008637	4.8e-248	815.4	ACTR8		K11673		aveNOG[1]	04G69@aveNOG,09TZD@biNOG,0DF9C@chorNOG,0V4Y9@meNOG,12QBG@opiNOG,1CPYY@veNOG,COG5277@NOG,KOG0797@euNOG	KOG0797|9.9e-144|484.5	Z	actin-related protein
g_1191	9031.ENSGALP00000008524	1.3e-34	109.9	DCP1A		K12610		aveNOG[1]	04M9F@aveNOG,09YJ0@biNOG,0DH8N@chorNOG,0V9GR@meNOG,0XRY6@NOG,13ATC@opiNOG,1CUT7@veNOG,KOG2868@euNOG	KOG2868|1.9e-25|93.8	A, K	DCP1 decapping enzyme homolog b (S. cerevisiae)
g_1194	9031.ENSGALP00000008419	1.1e-43	142.4					aveNOG[1]	09T4D@biNOG,0DEFM@chorNOG,0V433@meNOG,0XR47@NOG,12S48@opiNOG,1CP5A@veNOG,KOG0999@euNOG	KOG0999|1.7e-27|100.1	U	bicaudal D homolog
g_1195	9031.ENSGALP00000008419	0	1243.6					aveNOG[1]	09T4D@biNOG,0DEFM@chorNOG,0V433@meNOG,0XR47@NOG,12S48@opiNOG,1CP5A@veNOG,KOG0999@euNOG	KOG0999|2.9e-273|913.4	U	bicaudal D homolog
g_1198	13735.ENSPSIP00000003369	3.8e-117	381.3					aveNOG[1]	09Y1V@biNOG,0DJEV@chorNOG,0IY2S@euNOG,0V8ZC@meNOG,11VKU@NOG,13MIT@opiNOG,1CU7E@veNOG	0IY2S|3e-102|345.9	S	Sushi domain containing 3
g_1204	7757.ENSPMAP00000005945	4.6e-33	103.8					aveNOG[1]	0B6IV@biNOG,0E9M0@chorNOG,0ITWN@euNOG,0WJ9K@meNOG,12AF3@NOG,13GAE@opiNOG	0ITWN|5.5e-33|118.8	S	NA
g_1205	61853.ENSNLEP00000020084	3e-297	977.8					aveNOG[1]	0AQKR@biNOG,0E3Z1@chorNOG,0J7PP@euNOG,0V27H@maNOG,0W34Q@meNOG,0Z5PG@NOG,12XZE@opiNOG,1DE5A@veNOG	0J7PP|2.8e-220|738.3	S	NA
g_1207	9031.ENSGALP00000008299	1.5e-172	564.3	FAM120A				aveNOG[1]	04KGX@aveNOG,09TW6@biNOG,0DF6I@chorNOG,0IE6R@euNOG,0V4VC@meNOG,0XPY7@NOG,12NKY@opiNOG,1CPW4@veNOG	0IE6R|9.4e-141|474.9	S	family with sequence similarity
g_1209	9031.ENSGALP00000008273	0	2154.4	PHF2		K19414		aveNOG[1]	04N19@aveNOG,09TS2@biNOG,0DF2G@chorNOG,0V4RC@meNOG,0XQXU@NOG,12N4D@opiNOG,1CQG6@veNOG,KOG1633@euNOG	04N19|0.0|2241.1	B	PHD finger protein 2
g_1214	59729.ENSTGUP00000003844	3.6e-158	520.5		GO:0005575,GO:0005622,GO:0005623,GO:0005634,GO:0043226,GO:0043227,GO:0043229,GO:0043231,GO:0044424,GO:0044464	K09361		aveNOG[1]	04I6R@aveNOG,09ZA8@biNOG,0DKSH@chorNOG,0VA7J@meNOG,1188D@NOG,13JQW@opiNOG,1CVM9@veNOG,KOG0488@euNOG	KOG0488|1.2e-42|150.1	K	homeobox
g_1220	9103.ENSMGAP00000005337	1.1e-134	433.7	WNT7A	GO:0005575,GO:0005576,GO:0005578,GO:0031012,GO:0044421	K00572		aveNOG[1]	04GT6@aveNOG,09V80@biNOG,0DN64@chorNOG,0V67H@meNOG,0XQZ1@NOG,12R4V@opiNOG,1CRRV@veNOG,KOG3913@euNOG	04GT6|1.2e-133|449.5	T	Ligand for members of the frizzled family of seven transmembrane receptors (By similarity)
g_1221	8364.ENSXETP00000030968	6e-65	212.5					aveNOG[1]	0B47V@biNOG,0E85Y@chorNOG,0IPTH@euNOG,0WGQ2@meNOG,0ZNVY@NOG,13CQB@opiNOG,1DF4W@veNOG	0IPTH|1.4e-89|305.4	O	G2 M-phase specific E3 ubiquitin protein ligase
g_1222	59729.ENSTGUP00000003906	6.1e-179	583					aveNOG[1]	04QX4@aveNOG,0B4ZX@biNOG,0E8MC@chorNOG,0WHJJ@meNOG,0Y194@NOG,13DX5@opiNOG,1DFJ4@veNOG,KOG1217@euNOG	04QX4|1.4e-158|533.7	T	Anaphylotoxin-like domain
g_1226	9031.ENSGALP00000008128	1.6e-28	92.9	NUP210		K14314		aveNOG[1]	04N4C@aveNOG,09TF9@biNOG,0DFTR@chorNOG,0V4EC@meNOG,0XNNU@NOG,12N79@opiNOG,1CQH4@veNOG,KOG1833@euNOG	KOG1833|2e-08|35.9	U, Y	nucleoporin
g_1229	9031.ENSGALP00000008077	2.7e-43	135.8					aveNOG[1]	04QFR@aveNOG,0B2NI@biNOG,0E1YB@chorNOG,0JJT1@euNOG,0WEIT@meNOG,114T6@NOG,14V5S@opiNOG,1D9U0@veNOG	0JJT1|4.1e-43|151.0	S	NA
g_1237	9103.ENSMGAP00000018476	1.6e-71	231.4					aveNOG[1]	0A3TG@biNOG,0DRDF@chorNOG,0J2PC@euNOG,0VEMY@meNOG,12AA9@NOG,13WQT@opiNOG,1D0J7@veNOG	0J2PC|4e-55|191.6	S	kiaa1257
g_1239	9031.ENSGALP00000008027	1.6e-177	581.1					aveNOG[1]	04N2H@aveNOG,0APPV@biNOG,0E3I1@chorNOG,0IH78@euNOG,0W213@meNOG,0Y9W3@NOG,13HRF@opiNOG,1DAR6@veNOG	0IH78|3.6e-146|491.9	S	Coiled-coil domain containing 48
g_1241	9031.ENSGALP00000008024	2e-40	134.3	RAB43				aveNOG[1]	04JH5@aveNOG,0A2RN@biNOG,0DJAJ@chorNOG,0V8V4@meNOG,0XQN5@NOG,13IQC@opiNOG,1CU2P@veNOG,KOG0084@euNOG	KOG0084|1.1e-18|70.3	U	member RAS oncogene family
g_1243	9031.ENSGALP00000008023	8e-273	899					aveNOG[1]	04MUX@aveNOG,09XRF@biNOG,0DJ3H@chorNOG,0V8P3@meNOG,13MPA@opiNOG,1CTVA@veNOG,COG0647@NOG,KOG1618@euNOG	KOG1618|3.8e-127|429.6	G	Cat eye syndrome chromosome region, candidate 5
g_1251	9305.ENSSHAP00000012886	1.5e-164	536.9					aveNOG[1]	0B3WY@biNOG,0E7YV@chorNOG,0IP7R@euNOG,0V2Y9@maNOG,0WGBU@meNOG,10IFE@NOG,13C8M@opiNOG,1DEYA@veNOG	0IP7R|2.3e-163|548.0	O	makorin ring finger protein 2
g_1253	9103.ENSMGAP00000004916	7e-297	978	TSEN2	GO:0005575,GO:0005622,GO:0005623,GO:0005634,GO:0043226,GO:0043227,GO:0043229,GO:0043231,GO:0044424,GO:0044464	K15322		aveNOG[1]	04FXE@aveNOG,09VR7@biNOG,0DGZS@chorNOG,0V6Q5@meNOG,12NW2@opiNOG,1CRQ1@veNOG,COG1676@NOG,KOG4685@euNOG	KOG4685|2.5e-105|357.7	J	tRNA splicing endonuclease 2 homolog (S. cerevisiae)
g_1256	9544.ENSMMUP00000001492	7.7e-48	156.6					aveNOG[1]	09WII@biNOG,0DHTV@chorNOG,0UPM1@maNOG,0V7H2@meNOG,0XQH5@NOG,12PJE@opiNOG,1658P@prNOG,1AV1F@spriNOG,1CSI9@veNOG,KOG3895@euNOG	KOG3895|1.2e-28|103.7	T, U	SyNapsiN
g_1260	13735.ENSPSIP00000019303	8.5e-36	112.3					aveNOG[1]	0B3BK@biNOG,0E7KX@chorNOG,0IN3A@euNOG,0WFQ5@meNOG,0ZA1D@NOG,13B9V@opiNOG,1DEMA@veNOG	0IN3A|3.9e-32|114.0	T	Plexin A2
g_1272	9103.ENSMGAP00000004466	2.7e-103	337.1	IARS		K01870		aveNOG[1]	04NKH@aveNOG,0A05T@biNOG,0DMRU@chorNOG,0VB1Z@meNOG,12N5V@opiNOG,1CWMH@veNOG,COG0060@NOG,KOG0434@euNOG	KOG0434|4.7e-47|164.1	J	isoleucyltRNA synthetase
g_1275	7955.ENSDARP00000111969	2.1e-52	166.4					aveNOG[1]	0AA6Q@biNOG,0DW25@chorNOG,0JN9V@euNOG,0N9UB@fiNOG,0VM4F@meNOG,11YIJ@NOG,14CPR@opiNOG,1D5C5@veNOG	0JN9V|3.8e-61|210.4	S	Inherit from NOG: coiled-coil glutamate-rich protein 1
g_1279	9031.ENSGALP00000007439	7.1e-107	348.3			K14443		aveNOG[1]	04NI1@aveNOG,0A7FS@biNOG,0DU4P@chorNOG,0VIAF@meNOG,0ZZC0@NOG,13R22@opiNOG,1D3GS@veNOG,KOG4006@euNOG	KOG4006|8.7e-47|162.6	T	B-cell translocation gene
g_1281	9103.ENSMGAP00000004162	1.2e-267	881.3	ATRIP				aveNOG[1]	04NR6@aveNOG,09XJQ@biNOG,0DIXB@chorNOG,0IHIV@euNOG,0V8HP@meNOG,107QS@NOG,12S9N@opiNOG,1CTNU@veNOG	0IHIV|1.2e-195|656.3	S	ATR interacting protein
g_1282	8364.ENSXETP00000030968	1.4e-64	210.8					aveNOG[1]	0B47V@biNOG,0E85Y@chorNOG,0IPTH@euNOG,0WGQ2@meNOG,0ZNVY@NOG,13CQB@opiNOG,1DF4W@veNOG	0IPTH|3.1e-173|581.7	O	G2 M-phase specific E3 ubiquitin protein ligase
g_1284	8364.ENSXETP00000030968	8.5e-64	208.4					aveNOG[1]	0B47V@biNOG,0E85Y@chorNOG,0IPTH@euNOG,0WGQ2@meNOG,0ZNVY@NOG,13CQB@opiNOG,1DF4W@veNOG	0IPTH|1.1e-87|299.2	O	G2 M-phase specific E3 ubiquitin protein ligase
g_1285	9031.ENSGALP00000003908	0	2621.3	RNF123		K12169		aveNOG[1]	04EGA@aveNOG,0A1T3@biNOG,0DPFA@chorNOG,0VCNU@meNOG,0XQ4V@NOG,12UE9@opiNOG,1CYDE@veNOG,KOG2242@euNOG,KOG4692@euNOG	KOG4692|0.0|1532.7	O	Ring finger protein 123
g_1286	9258.ENSOANP00000024052	4.6e-175	574.6					aveNOG[1]	0A290@biNOG,0DHEB@chorNOG,0IGMJ@euNOG,0URQ5@maNOG,0VD4U@meNOG,0YSS0@NOG,13H7R@opiNOG,1CYWG@veNOG	0IGMJ|3.8e-168|564.5	T	Adhesion molecule with Ig-like domain 3
g_1287	7897.ENSLACP00000001870	7.7e-75	240.9					aveNOG[1]	0B4KC@biNOG,0IQF8@euNOG,0WH4E@meNOG,0ZVZ3@NOG,13DAF@opiNOG	0IQF8|1.8e-61|212.4	O	RING
g_1288	8128.ENSONIP00000005406	2.8e-208	683.9					aveNOG[1]	09VII@biNOG,0DPB6@chorNOG,0N2D1@fiNOG,0V6HR@meNOG,12PBS@opiNOG,1CY95@veNOG,COG1208@NOG,KOG1322@euNOG	12PBS|1.6e-220|738.4	M	mannose-1-phosphate guanyltransferase
g_1290	8049.ENSGMOP00000012151	5.5e-202	662.9					aveNOG[1]	0B40S@biNOG,0E81H@chorNOG,0IPES@euNOG,0NC8B@fiNOG,0WGG0@meNOG,0XSMY@NOG,13CDT@opiNOG,1DF0T@veNOG	0IPES|7.8e-122|411.7	I, K, T	inositol
g_1292	9103.ENSMGAP00000002923	0	1129.5					aveNOG[1]	0A262@biNOG,0DPUB@chorNOG,0J2PQ@euNOG,0VD1M@meNOG,1196U@NOG,13Y0S@opiNOG,1CYTD@veNOG	0J2PQ|4.4e-272|908.3	U	cadherin-related family member 4
g_1293	59729.ENSTGUP00000005375	1.5e-78	255.6					aveNOG[1]	0A35F@biNOG,0DQSY@chorNOG,0IWR5@euNOG,0VDN1@meNOG,11TCQ@NOG,13T4X@opiNOG,1CZWF@veNOG	0IWR5|1.2e-86|295.2	S	family with sequence similarity 212, member A
g_1294	9031.ENSGALP00000003964	0	1735.7					aveNOG[1]	09YC0@biNOG,0DNZ7@chorNOG,0V8UH@meNOG,12PN3@opiNOG,1CYJA@veNOG,COG0476@NOG,KOG2012@euNOG	1CYJA|0.0|1302.7	O	Ubiquitin-like modifier activating enzyme
g_1295	9785.ENSLAFP00000008153	1.8e-22	71.2					aveNOG[1]	0A8M9@biNOG,0DV4B@chorNOG,0J3NY@euNOG,0UW35@maNOG,0VJHR@meNOG,127ZJ@NOG,13X8Q@opiNOG,1D4D7@veNOG	0J3NY|8.8e-19|71.0	U	T-cell leukemia translocation altered
g_1296	28377.ENSACAP00000007316	2.7e-194	639.3					aveNOG[1]	09W27@biNOG,0DKU5@chorNOG,0V70C@meNOG,12SPH@opiNOG,1CVP1@veNOG,COG0404@NOG,KOG2770@euNOG	KOG2770|6e-177|594.4	E	The glycine cleavage system catalyzes the degradation of glycine (By similarity)
g_1297	28377.ENSACAP00000007346	1.8e-83	271.5					aveNOG[1]	09XX5@biNOG,0DS2H@chorNOG,0IHPW@euNOG,0VFEW@meNOG,11GDK@NOG,12RS8@opiNOG,1CYDV@veNOG	0IHPW|2.3e-82|279.7	S	nicolin 1
g_1298	59729.ENSTGUP00000005324	0	1949.1			K06265		aveNOG[1]	04NVZ@aveNOG,09XBN@biNOG,0DN56@chorNOG,0VAT0@meNOG,0XQTU@NOG,12PPK@opiNOG,1CX1Q@veNOG,KOG3781@euNOG	KOG3781|5.6e-238|796.1	W	Dystroglycan 1 (Dystrophin-associated glycoprotein 1)
g_1300	9103.ENSMGAP00000002806	0	1585.6					aveNOG[1]	04FNF@aveNOG,09T6F@biNOG,0DEHM@chorNOG,0IDXR@euNOG,0V456@meNOG,12N2K@opiNOG,1CP7D@veNOG,COG5640@NOG	04FNF|0.0|1602.0	T	PAN_AP
g_1301	13735.ENSPSIP00000019399	3.5e-126	411					aveNOG[1]	0B13D@biNOG,0E6E2@chorNOG,0IQ8I@euNOG,0WDMK@meNOG,11JIX@NOG,14UDV@opiNOG,1DDCS@veNOG	0IQ8I|5.9e-147|494.5	O	NA
g_1302	13735.ENSPSIP00000019399	1e-202	664.1					aveNOG[1]	0B13D@biNOG,0E6E2@chorNOG,0IQ8I@euNOG,0WDMK@meNOG,11JIX@NOG,14UDV@opiNOG,1DDCS@veNOG	0IQ8I|6.3e-196|656.2	O	NA
g_1303	9103.ENSMGAP00000002519	0	6171.7	BSN				aveNOG[1]	04G61@aveNOG,0A1IC@biNOG,0DJNN@chorNOG,0IGEH@euNOG,0VCE0@meNOG,0XX5R@NOG,12U56@opiNOG,1CY4D@veNOG	0IGEH|0.0|5168.8	S	bassoon (presynaptic cytomatrix protein)
g_1304	9031.ENSGALP00000035506	8.1e-224	735.2	BSN				aveNOG[1]	04G61@aveNOG,0A1IC@biNOG,0DJNN@chorNOG,0IGEH@euNOG,0VCE0@meNOG,0XX5R@NOG,12U56@opiNOG,1CY4D@veNOG	0IGEH|6.3e-139|468.6	S	bassoon (presynaptic cytomatrix protein)
g_1306	9031.ENSGALP00000004571	1.4e-292	962.9	TRAIP				aveNOG[1]	04P1X@aveNOG,09Z3C@biNOG,0DKIY@chorNOG,0VA0W@meNOG,0YY6J@NOG,13MYN@opiNOG,1CVD2@veNOG,KOG0827@euNOG	KOG0827|1.6e-99|338.0	O	Traf interacting protein
g_1307	59729.ENSTGUP00000005209	6.6e-234	767.7			K08812		aveNOG[1]	04JAD@aveNOG,09VX1@biNOG,0DH55@chorNOG,0V6VG@meNOG,0XRMJ@NOG,12PJ0@opiNOG,1CRVE@veNOG,KOG0032@euNOG	09VX1|9.1e-251|836.5	T	CaM kinase-like vesicle-associated
g_1309	9031.ENSGALP00000004891	0	2518.3					aveNOG[1]	09WT5@biNOG,0DG7J@chorNOG,0V7R9@meNOG,0XPVX@NOG,131GQ@opiNOG,1CSTI@veNOG,KOG1095@euNOG,KOG3610@euNOG	1CSTI|0.0|2047.9	T	macrophage stimulating 1 receptor (c-met-related tyrosine kinase)
g_1310	9103.ENSMGAP00000002313	0	1221.5					aveNOG[1]	04I9X@aveNOG,09U8J@biNOG,0DFIB@chorNOG,0V57Q@meNOG,0XR29@NOG,12NKZ@opiNOG,1CQ84@veNOG,KOG0997@euNOG	KOG0997|4.5e-175|587.4	V	vacuolar fusion protein MON1
g_1312	9031.ENSGALP00000004634	0	1234.9					aveNOG[1]	04QV3@aveNOG,0B4JY@biNOG,0E8DH@chorNOG,0IQDR@euNOG,0WH3T@meNOG,11TS3@NOG,13D9B@opiNOG,1DFBY@veNOG	0IQDR|7.2e-276|922.0	S	RNA binding motif protein 6
g_1314	9031.ENSGALP00000005064	0	1466.4					aveNOG[1]	04MCP@aveNOG,09ZS1@biNOG,0DMA6@chorNOG,0VANH@meNOG,0XQZC@NOG,14173@opiNOG,1CW5C@veNOG,KOG3611@euNOG	04MCP|0.0|1438.4	T	Sema
g_1315	9103.ENSMGAP00000002554	0	3184.3	RAD54L2		K10876		aveNOG[1]	04ESX@aveNOG,09XSS@biNOG,0DJ4S@chorNOG,0V740@meNOG,12PQE@opiNOG,1CTWP@veNOG,COG0553@NOG,KOG1015@euNOG	04ESX|0.0|3414.3	K	RAD54-like 2 (S. cerevisiae)
g_1319	9031.ENSGALP00000033798	0	1095.3					aveNOG[1]	04QFQ@aveNOG,0A63P@biNOG,0DT9S@chorNOG,0VGDX@meNOG,0XQE8@NOG,12S7J@opiNOG,1D1FP@veNOG,KOG2032@euNOG	KOG2032|2.8e-153|516.5	O	HEAT repeat
g_1320	9483.ENSCJAP00000011340	2.5e-63	206.9					aveNOG[1]	0B47V@biNOG,0E85Y@chorNOG,0IPTH@euNOG,0V32K@maNOG,0WGQ2@meNOG,0ZNVY@NOG,13CQB@opiNOG,16NQ5@prNOG,1BAYG@spriNOG,1DF4W@veNOG	0IPTH|2.6e-88|301.2	O	G2 M-phase specific E3 ubiquitin protein ligase
g_1321	8364.ENSXETP00000057942	1.4e-47	150.3					aveNOG[1]	0A9AV@biNOG,0DVNW@chorNOG,0J0X8@euNOG,0VKFA@meNOG,11UHX@NOG,13UMQ@opiNOG,1D53X@veNOG	0J0X8|7.2e-38|134.6	Z	BRICK1, SCAR WAVE actin-nucleating complex subunit
g_1322	9031.ENSGALP00000005897	0	2551.8	FANCD2	GO:0005575,GO:0005622,GO:0005623,GO:0005634,GO:0005654,GO:0006139,GO:0006259,GO:0006281,GO:0006725,GO:0006807,GO:0006950,GO:0006974,GO:0008150,GO:0008152,GO:0009987,GO:0031974,GO:0031981,GO:0033554,GO:0034641,GO:0043170,GO:0043226,GO:0043227,GO:0043229,GO:0043231,GO:0043233,GO:0044237,GO:0044238,GO:0044260,GO:0044422,GO:0044424,GO:0044428,GO:0044446,GO:0044464,GO:0044699,GO:0044763,GO:0046483,GO:…	K10891		aveNOG[1]	04KSF@aveNOG,09WHD@biNOG,0DHSP@chorNOG,0V7FU@meNOG,0XT6B@NOG,12RQE@opiNOG,1CSGZ@veNOG,KOG4712@euNOG	KOG4712|0.0|1267.8	S	Fanconi anemia complementation group d2
g_1323	9031.ENSGALP00000005921	6.5e-178	582.9	TMEM111				aveNOG[1]	04HDV@aveNOG,0A03K@biNOG,0DMPA@chorNOG,0VAZT@meNOG,0XQK6@NOG,12R67@opiNOG,1CWIV@veNOG,KOG3188@euNOG	KOG3188|1.3e-128|433.2	J	ER membrane protein complex subunit 3
g_1324	9031.ENSGALP00000006014	3.8e-307	1005.7	USP4		K11835		aveNOG[1]	04GCT@aveNOG,09UA9@biNOG,0DG43@chorNOG,0V59F@meNOG,12QDF@opiNOG,1CQTP@veNOG,COG5560@NOG,KOG1870@euNOG	04GCT|6.4e-276|921.8	O	ubiquitin carboxyl-terminal hydrolase
g_1325	9103.ENSMGAP00000001846	2.1e-112	368.6	GPX1				aveNOG[1]	04M2I@aveNOG,0A38X@biNOG,0DPBV@chorNOG,0VE3N@meNOG,138EJ@opiNOG,1CV9V@veNOG,COG0386@NOG,KOG1651@euNOG	KOG1651|8.1e-46|160.0	O	glutathione peroxidase
g_1327	8364.ENSXETP00000030968	6.8e-66	215.2					aveNOG[1]	0B47V@biNOG,0E85Y@chorNOG,0IPTH@euNOG,0WGQ2@meNOG,0ZNVY@NOG,13CQB@opiNOG,1DF4W@veNOG	0IPTH|4.1e-92|313.8	O	G2 M-phase specific E3 ubiquitin protein ligase
g_1328	9483.ENSCJAP00000011340	3.1e-70	229.6					aveNOG[1]	0B47V@biNOG,0E85Y@chorNOG,0IPTH@euNOG,0V32K@maNOG,0WGQ2@meNOG,0ZNVY@NOG,13CQB@opiNOG,16NQ5@prNOG,1BAYG@spriNOG,1DF4W@veNOG	0IPTH|1.8e-95|324.8	O	G2 M-phase specific E3 ubiquitin protein ligase
g_1330	9031.ENSGALP00000006065	3.4e-109	354.7	TEX264				aveNOG[1]	04FI1@aveNOG,09T6V@biNOG,0DEHZ@chorNOG,0IJI6@euNOG,0V45K@meNOG,11NB9@NOG,13JBP@opiNOG,1CP7S@veNOG	0IJI6|9.5e-80|271.9	S	testis expressed 264
g_1331	9031.ENSGALP00000006065	9.9e-99	320.5	TEX264				aveNOG[1]	04FI1@aveNOG,09T6V@biNOG,0DEHZ@chorNOG,0IJI6@euNOG,0V45K@meNOG,11NB9@NOG,13JBP@opiNOG,1CP7S@veNOG	0IJI6|6.3e-42|147.7	S	testis expressed 264
g_1333	9103.ENSMGAP00000003058	0	1956	GRM2	GO:0005575,GO:0005623,GO:0005886,GO:0016020,GO:0044464,GO:0071944			aveNOG[1]	04MBS@aveNOG,09TPM@biNOG,0DGFT@chorNOG,0V59W@meNOG,0XR6W@NOG,12RDB@opiNOG,1CR5F@veNOG,KOG1056@euNOG	04MBS|0.0|2055.6	T	glutamate receptor, metabotropic 2
g_1334	9031.ENSGALP00000033798	0	1024.6					aveNOG[1]	04QFQ@aveNOG,0A63P@biNOG,0DT9S@chorNOG,0VGDX@meNOG,0XQE8@NOG,12S7J@opiNOG,1D1FP@veNOG,KOG2032@euNOG	KOG2032|4e-159|535.9	O	HEAT repeat
g_1335	9103.ENSMGAP00000002874	8.5e-293	964.6			K00643		aveNOG[1]	04I80@aveNOG,0A1QQ@biNOG,0DNU3@chorNOG,0VCK8@meNOG,12RIT@opiNOG,1CYAP@veNOG,COG0156@NOG,KOG1360@euNOG	KOG1360|1.5e-149|503.8	H	synthase
g_1336	9103.ENSMGAP00000003047	7.7e-228	749.4					aveNOG[1]	09U30@biNOG,0DNKE@chorNOG,0V521@meNOG,0XS1J@NOG,12NHS@opiNOG,1CQPZ@veNOG,KOG1747@euNOG	KOG1747|2.6e-175|588.4	Z	Twinfilin, actin-binding protein, homolog
g_1337	9031.ENSGALP00000006357	7.8e-275	905.1	PPM1M		K17507		aveNOG[1]	04NC7@aveNOG,0A15I@biNOG,0DKVG@chorNOG,0V7EP@meNOG,0XP4B@NOG,12QUN@opiNOG,1CVQJ@veNOG,KOG1323@euNOG	KOG1323|6.3e-193|646.3	T	protein phosphatase, Mg2 Mn2 dependent
g_1338	8364.ENSXETP00000006015	9.1e-60	192.4					aveNOG[1]	0B18E@biNOG,0E6HY@chorNOG,0WDTD@meNOG,0XT9X@NOG,12UYD@opiNOG,1DDGF@veNOG,KOG1446@euNOG,KOG1747@euNOG	KOG1446|5.6e-39|138.0	A, B, O	WD repeatcontaining protein
g_1339	9103.ENSMGAP00000003109	0	1039.4	GLYCTK		K15788		aveNOG[1]	04EW0@aveNOG,09XXA@biNOG,0DJA9@chorNOG,0V8UY@meNOG,12U58@opiNOG,1CU2C@veNOG,COG2379@NOG,KOG3935@euNOG	04EW0|0.0|1103.3	G	MOFRL family
g_1340	9031.ENSGALP00000006832	0	6248.7	DNAH1				aveNOG[1]	04FQK@aveNOG,09TZJ@biNOG,0DGVY@chorNOG,0V4YE@meNOG,12NG3@opiNOG,1CRK6@veNOG,COG5245@NOG,KOG3595@euNOG	04FQK|0.0|6444.5	Z	Dynein heavy chain, N-terminal region 2
g_1341	9031.ENSGALP00000033495	0	1113.9					aveNOG[1]	04FRM@aveNOG,0A5F8@biNOG,0DTEB@chorNOG,0IG8W@euNOG,0VH9R@meNOG,11N2F@NOG,12V7K@opiNOG,1D2RJ@veNOG	0IG8W|1.1e-146|493.7	S	HAUS augmin-like complex subunit 3
g_1342	9031.ENSGALP00000006832	0	2906	DNAH1				aveNOG[1]	04FQK@aveNOG,09TZJ@biNOG,0DGVY@chorNOG,0V4YE@meNOG,12NG3@opiNOG,1CRK6@veNOG,COG5245@NOG,KOG3595@euNOG	04FQK|0.0|3072.6	Z	Dynein heavy chain, N-terminal region 2
g_1343	9031.ENSGALP00000006954	0	1535.2	BAP1	GO:0001558,GO:0003674,GO:0003682,GO:0003824,GO:0004221,GO:0004843,GO:0005488,GO:0005575,GO:0005622,GO:0005623,GO:0005634,GO:0005737,GO:0006325,GO:0006464,GO:0006996,GO:0008150,GO:0008152,GO:0008233,GO:0008234,GO:0009987,GO:0016043,GO:0016568,GO:0016569,GO:0016570,GO:0016578,GO:0016579,GO:0016787,GO:0016788,GO:0016790,GO:0019538,GO:0019783,GO:0031519,GO:0032991,GO:0035517,GO:0035520,GO:0035521,GO:…	K08588		aveNOG[1]	04GPY@aveNOG,09UI1@biNOG,0DFTQ@chorNOG,0V5H7@meNOG,0XP0P@NOG,12PN7@opiNOG,1CQH3@veNOG,KOG2778@euNOG	KOG2778|1.3e-161|543.7	O	ubiquitin carboxyl-terminal hydrolase
g_1345	9103.ENSMGAP00000003557	0	1510.1	SEMA3G				aveNOG[1]	04J7Z@aveNOG,09TU1@biNOG,0DF4A@chorNOG,0V4TB@meNOG,0XQZC@NOG,13I35@opiNOG,1CPU5@veNOG,KOG3611@euNOG	04J7Z|0.0|1543.3	T	sema domain, immunoglobulin domain (Ig), short basic domain, secreted, (semaphorin) 3G
g_1346	9103.ENSMGAP00000003601	7.6e-276	901					aveNOG[1]	04KUB@aveNOG,09Y2F@biNOG,0DR2R@chorNOG,0VEAI@meNOG,13K2H@opiNOG,1D07K@veNOG,COG0624@NOG,KOG2275@euNOG	04KUB|1.2e-280|933.6	E	Peptidase dimerisation domain
g_1347	28377.ENSACAP00000011674	8e-88	285.8					aveNOG[1]	0A3V2@biNOG,0DREY@chorNOG,0IWCE@euNOG,0VEHX@meNOG,13PZC@opiNOG,1D0M1@veNOG,COG0596@NOG	0IWCE|1.1e-89|303.9	S	abhydrolase domain containing 14A
g_1348	28377.ENSACAP00000011663	8.7e-105	340.6					aveNOG[1]	0A1BD@biNOG,0DNZ1@chorNOG,0IHBA@euNOG,0VC71@meNOG,12R4U@opiNOG,1CXWF@veNOG,COG0596@NOG	0IHBA|7.5e-91|309.3	S	abhydrolase domain containing 14b
g_1349	28377.ENSACAP00000011648	2.6e-211	696.8					aveNOG[1]	09TAA@biNOG,0DK6B@chorNOG,0V49C@meNOG,0XNN8@NOG,12N4Q@opiNOG,1CV0A@veNOG,KOG2190@euNOG	KOG2190|1.3e-111|377.6	A	PolyrC binding protein
g_1350	9103.ENSMGAP00000003670	1.2e-249	818.5					aveNOG[1]	09Y6H@biNOG,0DJK1@chorNOG,0V940@meNOG,0XRW9@NOG,1370F@opiNOG,1D0GP@veNOG,KOG3656@euNOG	1D0GP|4e-194|649.3	T	G-protein coupled receptor-like
g_1351	9103.ENSMGAP00000003712	0	1071.4	PARP3				aveNOG[1]	04NXG@aveNOG,09WU5@biNOG,0DI3Z@chorNOG,0V7S4@meNOG,0XP18@NOG,13JVN@opiNOG,1CSUC@veNOG,KOG1037@euNOG	KOG1037|5e-176|591.8	L	poly ADP-ribose polymerase
g_1352	9103.ENSMGAP00000003808	0	1711	RBM5				aveNOG[1]	04EDD@aveNOG,0A1GJ@biNOG,0DP4A@chorNOG,0VCC4@meNOG,0YNFQ@NOG,13DG3@opiNOG,1CY2A@veNOG,KOG0154@euNOG	KOG0154|4.4e-175|588.1	O	RNA binding motif protein
g_1353	9103.ENSMGAP00000004026	0	1767.4	SEMA3F		K06840		aveNOG[1]	04NVV@aveNOG,0A29P@biNOG,0DNTA@chorNOG,0VD5M@meNOG,0XQZC@NOG,13M0G@opiNOG,1CXQK@veNOG,KOG3611@euNOG	04NVV|0.0|1754.3	T	Sema
g_1354	9615.ENSCAFP00000015846	6.5e-236	769					aveNOG[1]	09T5Y@biNOG,0CIJK@carNOG,0DMET@chorNOG,0UK26@maNOG,0V44R@meNOG,0XNVQ@NOG,12N3X@opiNOG,1CVX2@veNOG,KOG0082@euNOG	0CIJK|3.4e-246|819.6	D, T	guanine nucleotide binding protein (G protein), alpha transducing activity polypeptide 1
g_1355	59729.ENSTGUP00000006690	7.7e-237	771.5	GNAI2	GO:0001664,GO:0001973,GO:0003674,GO:0003824,GO:0003924,GO:0004871,GO:0005102,GO:0005488,GO:0005515,GO:0005575,GO:0005622,GO:0005623,GO:0005737,GO:0005813,GO:0005815,GO:0005834,GO:0005856,GO:0005886,GO:0006139,GO:0006152,GO:0006163,GO:0006184,GO:0006195,GO:0006725,GO:0006753,GO:0006793,GO:0006796,GO:0006807,GO:0007154,GO:0007165,GO:0007166,GO:0007186,GO:0007187,GO:0007188,GO:0007193,GO:0007214,GO:…	K04630		aveNOG[1]	04MAB@aveNOG,09T5Y@biNOG,0DEH5@chorNOG,0V44R@meNOG,0XNVQ@NOG,12N3X@opiNOG,1CP6W@veNOG,KOG0082@euNOG	04MAB|2e-249|830.2	D, T	guanine nucleotide binding protein (G protein), alpha inhibiting activity polypeptide 2
g_1357	28377.ENSACAP00000009250	1.3e-274	907.8					aveNOG[1]	09VXT@biNOG,0DK9G@chorNOG,0V7U9@meNOG,12S53@opiNOG,1CV3D@veNOG,COG0814@NOG,KOG1305@euNOG	KOG1305|5.5e-127|428.9	E	Solute carrier family 38 member
g_1359	7897.ENSLACP00000018405	0	1180.9					aveNOG[1]	09YQF@biNOG,0DFQ0@chorNOG,0V9N8@meNOG,0XQZC@NOG,12RKU@opiNOG,1CQDK@veNOG,KOG3611@euNOG	1CQDK|0.0|1261.3	T	sema domain, immunoglobulin domain (Ig), short basic domain, secreted, (semaphorin)
g_1360	9031.ENSGALP00000035092	7.2e-279	921.9					aveNOG[1]	04ENF@aveNOG,09TUC@biNOG,0DF4M@chorNOG,0V4TK@meNOG,12QYV@opiNOG,1CP6T@veNOG,COG5272@NOG,KOG0001@euNOG	KOG0001|1.1e-112|381.7	O	ubiquitin
g_1361	13616.ENSMODP00000015250	1.1e-19	61.8					aveNOG[1]	0A7JP@biNOG,0DUF5@chorNOG,0IXEM@euNOG,0UVMI@maNOG,0VIHH@meNOG,1198B@NOG,13RCE@opiNOG,1D3SY@veNOG	0IXEM|4.4e-19|72.7	S	chromosome 3 open reading frame 45
g_1362	28377.ENSACAP00000008554	7.2e-156	510.5					aveNOG[1]	09T4F@biNOG,0DEFP@chorNOG,0IH0U@euNOG,0V435@meNOG,0XPZT@NOG,12T53@opiNOG,1CP5C@veNOG	0IH0U|9.8e-169|565.3	G	hyaluronoglucosaminidase 3
g_1363	59729.ENSTGUP00000014295	1.6e-91	296.9					aveNOG[1]	0B5JZ@biNOG,0E8Z5@chorNOG,0IS85@euNOG,0WI7K@meNOG,11U9V@NOG,13EVF@opiNOG,1DFVG@veNOG	0IS85|4.3e-63|216.6	S	Acetyltransferase (GNAT) family
g_1364	9103.ENSMGAP00000001358	0	1033.1					aveNOG[1]	09XSJ@biNOG,0DJTQ@chorNOG,0V9BC@meNOG,0XR6Z@NOG,134KU@opiNOG,1CUKV@veNOG,KOG2037@euNOG	1CUKV|8e-215|718.5	S	Guanylate binding protein
g_1365	9103.ENSMGAP00000001358	4.6e-26	83.6					aveNOG[1]	09XSJ@biNOG,0DJTQ@chorNOG,0V9BC@meNOG,0XR6Z@NOG,134KU@opiNOG,1CUKV@veNOG,KOG2037@euNOG	1CUKV|3.4e-15|59.3	S	Guanylate binding protein
g_1366	8364.ENSXETP00000030968	9.7e-64	208.2					aveNOG[1]	0B47V@biNOG,0E85Y@chorNOG,0IPTH@euNOG,0WGQ2@meNOG,0ZNVY@NOG,13CQB@opiNOG,1DF4W@veNOG	0IPTH|1.6e-90|308.5	O	G2 M-phase specific E3 ubiquitin protein ligase
g_1367	9103.ENSMGAP00000013031	1.5e-66	217	G2E3	GO:0005575,GO:0005622,GO:0005623,GO:0005634,GO:0005730,GO:0005737,GO:0031974,GO:0031981,GO:0043226,GO:0043227,GO:0043228,GO:0043229,GO:0043231,GO:0043232,GO:0043233,GO:0044422,GO:0044424,GO:0044428,GO:0044446,GO:0044464,GO:0070013			aveNOG[1]	04QTJ@aveNOG,0B47V@biNOG,0E85Y@chorNOG,0IPTH@euNOG,0WGQ2@meNOG,0ZNVY@NOG,13CQB@opiNOG,1DF4W@veNOG	0IPTH|5e-90|306.9	O	G2 M-phase specific E3 ubiquitin protein ligase
g_1368	9103.ENSMGAP00000001358	0	1023.6					aveNOG[1]	09XSJ@biNOG,0DJTQ@chorNOG,0V9BC@meNOG,0XR6Z@NOG,134KU@opiNOG,1CUKV@veNOG,KOG2037@euNOG	1CUKV|2.9e-213|713.4	S	Guanylate binding protein
g_1369	9103.ENSMGAP00000001358	0	1154.3					aveNOG[1]	09XSJ@biNOG,0DJTQ@chorNOG,0V9BC@meNOG,0XR6Z@NOG,134KU@opiNOG,1CUKV@veNOG,KOG2037@euNOG	1CUKV|2.6e-227|759.8	S	Guanylate binding protein
g_1371	9103.ENSMGAP00000001363	0	1188.4					aveNOG[1]	09XSJ@biNOG,0DJTQ@chorNOG,0V9BC@meNOG,0XR6Z@NOG,134KU@opiNOG,1CUKV@veNOG,KOG2037@euNOG	1CUKV|8.5e-230|768.0	S	Guanylate binding protein
g_1374	9031.ENSGALP00000003768	0	1650.5	VPRBP		K11789		aveNOG[1]	04FI4@aveNOG,09TSF@biNOG,0DF2S@chorNOG,0V4RS@meNOG,0XR8C@NOG,12XE7@opiNOG,1CYAB@veNOG,KOG1832@euNOG	KOG1832|4.2e-238|797.4	D	Vpr (HIV-1) binding protein
g_1375	28377.ENSACAP00000007519	0	1502.1					aveNOG[1]	0A1XN@biNOG,0DPD9@chorNOG,0VCT5@meNOG,0XSAC@NOG,12Q96@opiNOG,1CYII@veNOG,KOG0112@euNOG	KOG0112|3.9e-167|562.1	K	RNA binding motif protein
g_1376	9031.ENSGALP00000003715	1.4e-120	392.8					aveNOG[1]	04FWW@aveNOG,0A1UQ@biNOG,0DPGT@chorNOG,0VCQC@meNOG,11QMZ@NOG,13K0K@opiNOG,1CYF7@veNOG,KOG4154@euNOG	KOG4154|5.2e-80|272.0	O	Neurotrophic factor
g_1377	9031.ENSGALP00000003671	0	3148.8	DOCK3				aveNOG[1]	04KT1@aveNOG,09T86@biNOG,0DIHT@chorNOG,0V476@meNOG,0XQH7@NOG,12N3M@opiNOG,1CT88@veNOG,KOG1998@euNOG	04KT1|0.0|3339.7	T	dedicator of cytokinesis 3
g_1381	9031.ENSGALP00000003578	2.6e-47	152.7			K04444		aveNOG[1]	04NDY@aveNOG,09YBC@biNOG,0DJR3@chorNOG,0V7I5@meNOG,0XP8F@NOG,12PZ5@opiNOG,1CVTI@veNOG,KOG0604@euNOG	KOG0604|4.2e-09|39.8	T	mitogen-activated protein kinase-activated protein kinase
g_1384	9031.ENSGALP00000003536	4.5e-164	539.5	CISH				aveNOG[1]	04NAU@aveNOG,0A26G@biNOG,0DPUM@chorNOG,0VD22@meNOG,11V4J@NOG,13MTV@opiNOG,1CYTU@veNOG,KOG4566@euNOG	KOG4566|7.7e-57|197.2	T	suppressor of cytokine signaling
g_1389	9593.ENSGGOP00000006989	0	1973.8					aveNOG[1]	09TSD@biNOG,0DH4G@chorNOG,0RUDR@homNOG,0UFEU@maNOG,0V4RQ@meNOG,0XPDX@NOG,12NST@opiNOG,1648T@prNOG,1ARBN@spriNOG,1CRUR@veNOG,KOG2353@euNOG	0RUDR|0.0|2064.2	P, T	calcium channel, voltage-dependent, alpha 2 delta subunit 2
g_1390	28377.ENSACAP00000006863	9.1e-178	584.4					aveNOG[1]	0A0SN@biNOG,0DNIK@chorNOG,0VBP2@meNOG,0XQM0@NOG,12P7P@opiNOG,1CXFV@veNOG,KOG2890@euNOG	KOG2890|9.6e-109|368.2	U	Transmembrane protein 115
g_1391	59729.ENSTGUP00000004823	2.7e-109	355.8					aveNOG[1]	0A39H@biNOG,0DQX3@chorNOG,0IVNX@euNOG,0VE42@meNOG,11KF1@NOG,13JC8@opiNOG,1D012@veNOG	0IVNX|5.5e-84|284.7	C	cytochrome b-561 domain containing 2
g_1392	28377.ENSACAP00000006830	1.2e-247	814.4					aveNOG[1]	09T4H@biNOG,0DEFR@chorNOG,0V438@meNOG,0XP7B@NOG,12PUY@opiNOG,1CP5F@veNOG,KOG3789@euNOG	KOG3789|5e-157|527.8	P	nitrogen permease regulator-like 2 (S. cerevisiae)
g_1393	9103.ENSMGAP00000000912	1.4e-270	890					aveNOG[1]	04GVF@aveNOG,09Y4Q@biNOG,0DJHY@chorNOG,0IIFT@euNOG,0V926@meNOG,0Z083@NOG,12R2I@opiNOG,1CUAE@veNOG	0IIFT|3.5e-185|619.7	S	zinc finger, MYND-type containing 10
g_1394	28377.ENSACAP00000008491	5.9e-152	498.1					aveNOG[1]	0B3Y0@biNOG,0E7ZK@chorNOG,0IPAE@euNOG,0WGD0@meNOG,11HS2@NOG,13CA9@opiNOG,1DEZ2@veNOG	0IPAE|6.1e-130|438.2	T	Ras association (RalGDS AF-6) domain family member
g_1395	28377.ENSACAP00000008500	3.8e-67	215.6					aveNOG[1]	0A89D@biNOG,0DUVJ@chorNOG,0IYM4@euNOG,0VJ59@meNOG,11PVZ@NOG,13SJM@opiNOG,1D46H@veNOG	0IYM4|1.3e-49|170.6	O	tumor suppressor candidate 2
g_1396	9031.ENSGALP00000003336	0	1030.6	HYAL2				aveNOG[1]	04NPF@aveNOG,09TVP@biNOG,0DF64@chorNOG,0IECJ@euNOG,0V4NR@meNOG,0XPZT@NOG,12R8I@opiNOG,1CQ5X@veNOG	0IECJ|8.3e-183|613.3	G	hyaluronoglucosaminidase
g_1397	9103.ENSMGAP00000000865	6e-292	961.6					aveNOG[1]	09TVP@biNOG,0DF64@chorNOG,0IECJ@euNOG,0V4NR@meNOG,0XPZT@NOG,12R8I@opiNOG,1CPVQ@veNOG	0IECJ|5e-172|577.6	G	hyaluronoglucosaminidase
g_1400	9031.ENSGALP00000003132	0	1433.3	PRKCD		K06068		aveNOG[1]	04JQ1@aveNOG,09V0U@biNOG,0DHYR@chorNOG,0V6DY@meNOG,0XNPH@NOG,12NBF@opiNOG,1CX2D@veNOG,KOG0694@euNOG	KOG0694|2.8e-216|725.1	T	protein kinase c
g_1402	9031.ENSGALP00000033798	0	1300.6					aveNOG[1]	04QFQ@aveNOG,0A63P@biNOG,0DT9S@chorNOG,0VGDX@meNOG,0XQE8@NOG,12S7J@opiNOG,1D1FP@veNOG,KOG2032@euNOG	KOG2032|3e-169|569.5	O	HEAT repeat
g_1403	9031.ENSGALP00000003006	0	1139.1			K06316		aveNOG[1]	04KIY@aveNOG,0A2GU@biNOG,0DQ48@chorNOG,0VDCQ@meNOG,0Y1D5@NOG,13FRI@opiNOG,1CZ5B@veNOG,KOG2864@euNOG	KOG2864|6e-176|590.9	D	RFT1 homolog
g_1404	9031.ENSGALP00000006248	6.2e-52	170.3					aveNOG[1]	04QFQ@aveNOG,0A63P@biNOG,0DT9S@chorNOG,0VGDX@meNOG,0XQE8@NOG,12S7J@opiNOG,1D1FP@veNOG,KOG2032@euNOG	KOG2032|7.9e-12|47.6	O	HEAT repeat
g_1408	9031.ENSGALP00000002688	0	1907.7	SFMBT1				aveNOG[1]	04QMX@aveNOG,0B31E@biNOG,0E7ER@chorNOG,0IMEX@euNOG,0WFCR@meNOG,0XSJM@NOG,13AR3@opiNOG,1DEFR@veNOG	04QMX|0.0|1984.8	K	Scm-like with four mbt domains 1
g_1410	9031.ENSGALP00000002635	9.3e-35	113.7					aveNOG[1]	04GT8@aveNOG,09TDN@biNOG,0DEQU@chorNOG,0IEJ9@euNOG,0V4CR@meNOG,11FGH@NOG,12PA5@opiNOG,1CPEJ@veNOG	0IEJ9|1.4e-05|28.3	S	Transmembrane protein 110
g_1411	9031.ENSGALP00000002557	6.3e-126	413.3					aveNOG[1]	04MPW@aveNOG,09VWD@biNOG,0DK4M@chorNOG,0V4YN@meNOG,0Y7JF@NOG,12PVM@opiNOG,1CUYF@veNOG,KOG0589@euNOG	KOG0589|3e-81|277.7	T	NIMA-related kinase
g_1413	9103.ENSMGAP00000000210	8.8e-79	257.8	SPCS1		K12946		aveNOG[1]	04PI2@aveNOG,0A7BQ@biNOG,0DU8K@chorNOG,0VHZV@meNOG,1274V@NOG,13TNI@opiNOG,1D3KG@veNOG,KOG4112@euNOG	KOG4112|8.4e-48|165.8	U	Signal peptidase complex subunit 1 homolog (S. cerevisiae)
g_1414	9031.ENSGALP00000002452	0	1089.2	GNL3				aveNOG[1]	04GXF@aveNOG,09WR4@biNOG,0DI0U@chorNOG,0V7PK@meNOG,1324B@opiNOG,1CSRH@veNOG,COG1161@NOG,KOG2484@euNOG	KOG2484|1e-157|531.0	S	guanine nucleotide binding protein-like 3
g_1415	9258.ENSOANP00000010095	3.3e-145	472.7					aveNOG[1]	0B5SV@biNOG,0ISNG@euNOG,0WIFB@meNOG,0XVQ3@NOG,13F84@opiNOG	0ISNG|3.8e-139|469.1	B, K	BROMO
g_1416	9031.ENSGALP00000035519	2.1e-46	146.2	SNHG8				aveNOG[1]	04QAE@aveNOG,0A9XK@biNOG,0DVX8@chorNOG,0J2FX@euNOG,0VKE1@meNOG,12BRX@NOG,13WY4@opiNOG,1D57F@veNOG	0J2FX|2.6e-36|127.8	S	small integral membrane protein 4
g_1417	9031.ENSGALP00000002380	0	1266.8	NT5DC2				aveNOG[1]	04N7V@aveNOG,09XYK@biNOG,0DJBF@chorNOG,0V8WD@meNOG,0XT8W@NOG,12QU0@opiNOG,1CU3P@veNOG,KOG2470@euNOG	KOG2470|2e-257|861.2	F	5-nucleotidase domain containing
g_1418	9031.ENSGALP00000002331	0	2878.2					aveNOG[1]	04QY4@aveNOG,0B5B1@biNOG,0E8TQ@chorNOG,0IRWM@euNOG,0WHXU@meNOG,10T5S@NOG,13EGU@opiNOG,1DFQM@veNOG	0IRWM|0.0|2063.8	T	Stabilin
g_1421	59729.ENSTGUP00000006187	6e-106	338.2	TNNC1		K05865		aveNOG[1]	04F68@aveNOG,09W9V@biNOG,0DHJ3@chorNOG,0V787@meNOG,12QAN@opiNOG,1CS9B@veNOG,COG5126@NOG,KOG0027@euNOG	04F68|6e-108|361.5	Z	troponin C type 1 (slow)
g_1422	9103.ENSMGAP00000000624	2.4e-45	145.5	RPL29		K02905		aveNOG[1]	04Q67@aveNOG,0AABE@biNOG,0DTWM@chorNOG,0VM9A@meNOG,12428@NOG,13W61@opiNOG,1D3EG@veNOG,KOG3504@euNOG	KOG3504|8.8e-41|144.3	J	Ribosomal protein L29
g_1423	9258.ENSOANP00000023391	3.8e-247	813					aveNOG[1]	09UCM@biNOG,0DFN8@chorNOG,0UH1D@maNOG,0V5BV@meNOG,12NUM@opiNOG,1CQBT@veNOG,COG2453@NOG,KOG1717@euNOG	KOG1717|2.7e-170|572.7	V	Dual specificity protein phosphatase
g_1426	9031.ENSGALP00000002168	1.6e-242	799.4	RRP9				aveNOG[1]	04N8F@aveNOG,09WM5@biNOG,0DJ2P@chorNOG,0V7JS@meNOG,0XP9U@NOG,12Q02@opiNOG,1CTUD@veNOG,KOG0299@euNOG	KOG0299|1.1e-193|649.4	A	ribosomal RNA processing 9, small subunit (SSU) processome component, homolog (yeast)
g_1430	10020.ENSDORP00000002654	3.9e-62	200.4					aveNOG[1]	0A1X7@biNOG,0DPJA@chorNOG,0USX2@maNOG,0VAXA@meNOG,0XZ8W@NOG,12P63@opiNOG,18SSV@roNOG,1B34H@spriNOG,1CYI2@veNOG,KOG3632@euNOG	0DPJA|1e-43|153.1	T	RIMS binding protein
g_1431	9669.ENSMPUP00000019744	8e-45	146.8					aveNOG[1]	0A1X7@biNOG,0CJ72@carNOG,0DPJA@chorNOG,0US4M@maNOG,0VAXA@meNOG,0XZ8W@NOG,12P63@opiNOG,1CYI2@veNOG,KOG3632@euNOG	0DPJA|4.4e-99|336.7	T	RIMS binding protein
g_1434	13735.ENSPSIP00000001037	1.1e-30	96.6					aveNOG[1]	0A7Y3@biNOG,0DUNI@chorNOG,0VIT8@meNOG,12PBX@opiNOG,1D3XX@veNOG,COG2801@NOG,KOG0017@euNOG	0DUNI|7e-33|117.8	L	Inherit from opiNOG: to reverse transcriptase
g_1435	13735.ENSPSIP00000001037	1e-56	182.5					aveNOG[1]	0A7Y3@biNOG,0DUNI@chorNOG,0VIT8@meNOG,12PBX@opiNOG,1D3XX@veNOG,COG2801@NOG,KOG0017@euNOG	0DUNI|6.2e-66|226.9	L	Inherit from opiNOG: to reverse transcriptase
g_1436	13735.ENSPSIP00000001216	1.1e-72	236.3					aveNOG[1]	0A5RU@biNOG,0DUMB@chorNOG,0VGNY@meNOG,0Y65V@NOG,13JGH@opiNOG,1D3YR@veNOG,KOG1075@euNOG	0DUMB|4.1e-73|250.8	S	Reverse transcriptase (RNA-dependent DNA polymerase)
g_1437	9031.ENSGALP00000027811	9.4e-77	250.4					aveNOG[1]	0AN7Y@biNOG,0E0G1@chorNOG,0VP40@meNOG,0Y65V@NOG,149V6@opiNOG,1D8R0@veNOG,KOG1075@euNOG	0AN7Y|5.7e-90|306.3	S	Reverse transcriptase (RNA-dependent DNA polymerase)
g_1439	9031.ENSGALP00000003684	1.2e-284	937.6	GPC1	GO:0005575,GO:0005576,GO:0005615,GO:0005622,GO:0005623,GO:0005737,GO:0005768,GO:0005886,GO:0016020,GO:0043226,GO:0043227,GO:0043229,GO:0043231,GO:0044421,GO:0044424,GO:0044444,GO:0044464,GO:0071944			aveNOG[1]	04FU4@aveNOG,09TFF@biNOG,0DESG@chorNOG,0V4EI@meNOG,0XST2@NOG,12N7G@opiNOG,1CPG7@veNOG,KOG3821@euNOG	KOG3821|9e-128|431.3	T	Cell surface proteoglycan that bears heparan sulfate (By similarity)
g_1440	9669.ENSMPUP00000010077	9.6e-34	108.7					aveNOG[1]	09U73@biNOG,0CGUH@carNOG,0DFGS@chorNOG,0IE6A@euNOG,0UGTP@maNOG,0V567@meNOG,0XPAP@NOG,139M9@opiNOG,1CQ6G@veNOG	0IE6A|2e-34|123.2	S	coiled-coil domain containing 81
g_1441	9031.ENSGALP00000000543	1.1e-102	334.6	DUSP28				aveNOG[1]	04PBK@aveNOG,0A6SS@biNOG,0DTQV@chorNOG,0VHMC@meNOG,13R9G@opiNOG,1D34S@veNOG,COG2453@NOG,KOG1718@euNOG	KOG1718|4.1e-59|204.8	V	Dual specificity phosphatase
g_1442	9258.ENSOANP00000028999	1.7e-48	152.2					aveNOG[1]	0B0ZK@biNOG,0E6BC@chorNOG,0JBNE@euNOG,0V1N6@maNOG,0WDHB@meNOG,0Y2RS@NOG,14U87@opiNOG,1DDAD@veNOG	0JBNE|1.3e-45|158.6	S	NA
g_1444	7897.ENSLACP00000018694	2.6e-33	104.9					aveNOG[1]	0APXC@biNOG,0E3JP@chorNOG,0J32Y@euNOG,0W297@meNOG,0ZMQB@NOG,13XCA@opiNOG,1DASQ@veNOG	0J32Y|3.2e-35|125.9	S	MAP6 domain containing 1
g_1447	9031.ENSGALP00000003613	2.4e-248	818.2	YEATS2				aveNOG[1]	04IM2@aveNOG,09XXF@biNOG,0DJAK@chorNOG,0V8V6@meNOG,13ERB@opiNOG,1CU2Q@veNOG,COG5033@NOG,KOG3149@euNOG	KOG3149|1.5e-99|338.0	K	myeloid lymphoid or mixed-lineage leukemia (trithorax homolog, Drosophila)
g_1448	9785.ENSLAFP00000007239	5.8e-206	673.4					aveNOG[1]	09UF7@biNOG,0DM9H@chorNOG,0UJH7@maNOG,0VAMZ@meNOG,0XNX8@NOG,13K5B@opiNOG,1CW4N@veNOG,KOG4441@euNOG	0UJH7|1.1e-220|738.5	T	kelch-like 24 (Drosophila)
g_1450	9031.ENSGALP00000003540	0	1388	KLHL6		K10444		aveNOG[1]	04JD4@aveNOG,09XYJ@biNOG,0DJBC@chorNOG,0V8WC@meNOG,0XNX8@NOG,12U79@opiNOG,1CU3K@veNOG,KOG4441@euNOG	04JD4|0.0|1468.6	T	BACK
g_1451	9103.ENSMGAP00000000408	4.1e-192	630					aveNOG[1]	0A239@biNOG,0DPR8@chorNOG,0IGBM@euNOG,0VCYS@meNOG,116WM@NOG,13IQP@opiNOG,1CYQH@veNOG	0IGBM|6.6e-178|597.9	S	family with sequence similarity 123C
g_1455	9669.ENSMPUP00000011751	5.4e-290	950.4					aveNOG[1]	0B0SN@biNOG,0E65U@chorNOG,0KDSK@euNOG,0V1I7@maNOG,0WDA0@meNOG,0XQDV@NOG,14TZT@opiNOG,1DD52@veNOG	0KDSK|3.9e-299|997.5	T	Spermatogenesis associated 13
g_1460	13616.ENSMODP00000023242	2.3e-108	354.7					aveNOG[1]	09TQI@biNOG,0DGY7@chorNOG,0UN3G@maNOG,0V4PS@meNOG,0XSW4@NOG,12NBK@opiNOG,1CRNG@veNOG,KOG3955@euNOG	KOG3955|4.6e-70|240.8	O	Heparan sulfate 6-o-sulfotransferase
g_1461	9031.ENSGALP00000003371	5.8e-166	543.6	HS6ST1	GO:0005575,GO:0016020	K02514		aveNOG[1]	04EE3@aveNOG,09TQI@biNOG,0DGY7@chorNOG,0V4PS@meNOG,0XSW4@NOG,12NBK@opiNOG,1CRNG@veNOG,KOG3955@euNOG	KOG3955|2.8e-136|459.5	O	Heparan sulfate 6-o-sulfotransferase
g_1464	9031.ENSGALP00000003216	0	2173.6	SAP130	GO:0005575,GO:0005622,GO:0005623,GO:0005634,GO:0043226,GO:0043227,GO:0043229,GO:0043231,GO:0044424,GO:0044464	K19192		aveNOG[1]	04KZE@aveNOG,09URD@biNOG,0DQPY@chorNOG,0IJKN@euNOG,0VDXJ@meNOG,0ZRAM@NOG,13J9C@opiNOG,1CZT3@veNOG	0IJKN|0.0|1685.8	K	Sin3A-associated protein, 130kDa
g_1466	9103.ENSMGAP00000000660	2.7e-91	296.4			K03012		aveNOG[1]	04KEK@aveNOG,0A455@biNOG,0DRQ2@chorNOG,0VIJD@meNOG,13SB0@opiNOG,1D0XF@veNOG,COG5250@NOG,KOG2351@euNOG	KOG2351|4.9e-64|220.5	K	polymerase (RNA) II (DNA directed) polypeptide D
g_1470	8364.ENSXETP00000031074	5e-62	204.5					aveNOG[1]	09XSF@biNOG,0E3SG@chorNOG,0VEB6@meNOG,13I1I@opiNOG,COG5102@NOG,KOG2887@euNOG	KOG2887|6.5e-28|101.8	U	SFT2 domain containing
g_1472	9103.ENSMGAP00000016562	3.9e-222	727.8	GPR17				aveNOG[1]	04FVU@aveNOG,09X9B@biNOG,0DKZV@chorNOG,0IGZC@euNOG,0V8BB@meNOG,110RZ@NOG,12T2X@opiNOG,1CVUN@veNOG	0IGZC|1.3e-192|643.0	T	G protein-coupled receptor 17
g_1473	9031.ENSGALP00000002990	0	3743.7	MYO7B				aveNOG[1]	04M3K@aveNOG,09TNR@biNOG,0DEZ5@chorNOG,0V4MW@meNOG,12NAI@opiNOG,1CPNW@veNOG,COG5022@NOG,KOG4229@euNOG	KOG4229|0.0|1598.6	Z	Myosin VIIA
g_1475	9031.ENSGALP00000002782	0	1325.9	IWS1				aveNOG[1]	04HTU@aveNOG,0A0YV@biNOG,0DP2M@chorNOG,0VCAR@meNOG,12RAG@opiNOG,1CW6F@veNOG,COG5139@NOG,KOG1793@euNOG	KOG1793|2.5e-115|390.8	K	IWS1 homolog (S. cerevisiae)
g_1476	9103.ENSMGAP00000000966	0	1105					aveNOG[1]	0A5FU@biNOG,0DSTQ@chorNOG,0IPW1@euNOG,0VGAT@meNOG,13PG7@opiNOG,1D24B@veNOG,COG5640@NOG	0IPW1|4.3e-223|745.4	O	Tryp_SPc
g_1477	9103.ENSMGAP00000001002	9e-301	988.6					aveNOG[1]	04MSX@aveNOG,09USC@biNOG,0DG1Y@chorNOG,0IJRM@euNOG,0V5RV@meNOG,13N5R@opiNOG,1CQRF@veNOG,COG5640@NOG	0IJRM|3e-194|649.8	O	protein C (inactivator of coagulation factors Va and VIIIa)
g_1478	9103.ENSMGAP00000001071	5.6e-160	523.8					aveNOG[1]	09WZQ@biNOG,0DK3Y@chorNOG,0V7XP@meNOG,0XSJR@NOG,12NWP@opiNOG,1CUXR@veNOG,KOG1170@euNOG	KOG1170|6.6e-61|210.6	I	Diacylglycerol kinase
g_1480	9103.ENSMGAP00000001232	5.3e-246	809.8	SAG				aveNOG[1]	04MM3@aveNOG,0A05G@biNOG,0DMRD@chorNOG,0VAB3@meNOG,0XR0F@NOG,13PED@opiNOG,1CWKY@veNOG,KOG3865@euNOG	KOG3865|2.5e-161|542.6	T	arrestin
g_1481	9031.ENSGALP00000002472	4.4e-149	487.6	ATG16L1		K17890		aveNOG[1]	04H93@aveNOG,09Y47@biNOG,0DJHF@chorNOG,0V91P@meNOG,0XQYA@NOG,12TSC@opiNOG,1CU9W@veNOG,KOG0288@euNOG	KOG0288|9.4e-58|200.1	U	autophagy related 16-like 1 (S. cerevisiae)
g_1483	9031.ENSGALP00000040503	0	2570.1					aveNOG[1]	04KK0@aveNOG,09X1J@biNOG,0DENY@chorNOG,0V7ZR@meNOG,12Q93@opiNOG,1CR6F@veNOG,COG5411@NOG,KOG0565@euNOG	KOG0565|6.5e-104|352.6	U	inositol
g_1484	9031.ENSGALP00000002307	1.2e-262	863.3	NEU2				aveNOG[1]	04FXJ@aveNOG,09YDG@biNOG,0DGG2@chorNOG,0IFVF@euNOG,0VAZB@meNOG,0Y74Z@NOG,12RDV@opiNOG,1CR5Q@veNOG	0IFVF|5.7e-164|550.4	S	sialidase
g_1485	9031.ENSGALP00000002287	0	1251.2	NGEF		K07525		aveNOG[1]	04FPV@aveNOG,09UGY@biNOG,0DJD3@chorNOG,0V5G9@meNOG,12NRK@opiNOG,1CU5C@veNOG,COG5422@NOG,KOG3523@euNOG	04FPV|0.0|1309.4	T	neuronal guanine nucleotide exchange factor
g_1486	9031.ENSGALP00000040518	2.4e-58	188.1					aveNOG[1]	04PU2@aveNOG,0A9N1@biNOG,0DVRI@chorNOG,0J2DP@euNOG,0VKJC@meNOG,0Z788@NOG,147NF@opiNOG,1D51W@veNOG	0J2DP|2e-48|167.4	S	chromosome 2 open reading frame 82
g_1487	9823.ENSSSCP00000023699	5.3e-293	962.6					aveNOG[1]	0ISND@euNOG,0WIF3@meNOG,11ZUW@NOG,13F7U@opiNOG	0ISND|5.4e-219|733.0	S	PERQ amino acid-rich with GYF domain-containing protein 2-like
g_1488	9103.ENSMGAP00000001378	1.1e-238	786.8		GO:0005575,GO:0016020	K05006		aveNOG[1]	04HT7@aveNOG,0A0HA@biNOG,0DN4C@chorNOG,0VBDD@meNOG,0XQ62@NOG,12T85@opiNOG,1CTXZ@veNOG,KOG3827@euNOG	KOG3827|1.3e-103|351.0	P	Potassium inwardly-rectifying channel, subfamily J, member
g_1490	59729.ENSTGUP00000007456	4.8e-60	194	EFHD1				aveNOG[1]	04JP3@aveNOG,0A1IK@biNOG,0DMH6@chorNOG,0VCE3@meNOG,11JG9@NOG,13K7I@opiNOG,1CY4J@veNOG,KOG0041@euNOG	KOG0041|1.2e-54|189.6	S	EF-hand domain family, member
g_1491	9031.ENSGALP00000033741	8.4e-59	190	EFHD1				aveNOG[1]	04JP3@aveNOG,0A1IK@biNOG,0DMH6@chorNOG,0VCE3@meNOG,11JG9@NOG,13K7I@opiNOG,1CY4J@veNOG,KOG0041@euNOG	KOG0041|3.1e-16|63.1	S	EF-hand domain family, member
g_1492	13735.ENSPSIP00000012511	1.7e-131	427.8					aveNOG[1]	0B53R@biNOG,0E8PZ@chorNOG,0IRE4@euNOG,0WHPU@meNOG,124IE@NOG,13E39@opiNOG,1DFMB@veNOG	0IRE4|2.6e-143|482.6	B	autoimmune regulator
g_1493	13735.ENSPSIP00000000972	5.7e-69	220.4					aveNOG[1]	0AB7S@biNOG,0DWIX@chorNOG,0JEYI@euNOG,0VN8A@meNOG,0YWFZ@NOG,147HV@opiNOG,1D85E@veNOG	0JEYI|1.3e-68|233.1	S	NA
g_1496	9031.ENSGALP00000001975	2.6e-275	906.8	SCLY		K01763		aveNOG[1]	04MX8@aveNOG,09YIA@biNOG,0DJYQ@chorNOG,0V8CB@meNOG,12YTG@opiNOG,1CUSC@veNOG,COG1104@NOG,KOG1549@euNOG	KOG1549|6.7e-142|478.3	E	cysteine desulfurase
g_1500	9031.ENSGALP00000001845	0	1195.3	PCCB		K01966		aveNOG[1]	04HG3@aveNOG,09UHT@biNOG,0DFTG@chorNOG,0V5H1@meNOG,12Q0F@opiNOG,1CQGX@veNOG,COG4799@NOG,KOG0540@euNOG	KOG0540|8.2e-234|782.8	E, I	carboxylase, beta
g_1504	9031.ENSGALP00000001803	0	1240.1	DBR1	GO:0000375,GO:0003674,GO:0003824,GO:0004518,GO:0004519,GO:0004521,GO:0004540,GO:0005575,GO:0005622,GO:0005623,GO:0005634,GO:0006139,GO:0006396,GO:0006725,GO:0006807,GO:0008150,GO:0008152,GO:0008380,GO:0008419,GO:0009987,GO:0010467,GO:0016070,GO:0016787,GO:0016788,GO:0016891,GO:0016893,GO:0034641,GO:0043170,GO:0043226,GO:0043227,GO:0043229,GO:0043231,GO:0044237,GO:0044238,GO:0044260,GO:0044424,GO:…	K18328		aveNOG[1]	04FT6@aveNOG,09WCJ@biNOG,0DQ5A@chorNOG,0V7B0@meNOG,0XP0F@NOG,12PEC@opiNOG,1CZ6J@veNOG,KOG2863@euNOG	KOG2863|2.1e-192|644.0	A	debranching enzyme
g_1508	59729.ENSTGUP00000007230	0	1018.4	VPS8				aveNOG[1]	04HVC@aveNOG,09Y5K@biNOG,0DJIW@chorNOG,0V934@meNOG,0XRX6@NOG,12QAS@opiNOG,1CUBF@veNOG,KOG2079@euNOG	KOG2079|4.9e-140|472.0	U	vacuolar protein sorting 8 homolog (S. cerevisiae)
g_1509	59729.ENSTGUP00000007189	1.1e-109	355.4					aveNOG[1]	0A0CA@biNOG,0DMZ3@chorNOG,0IGTG@euNOG,0VB8E@meNOG,0XQHJ@NOG,13AZV@opiNOG,1CWV2@veNOG	0IGTG|3.5e-95|322.1	S	Chromosome 3 open reading frame 70
g_1510	31033.ENSTRUP00000026443	6.9e-36	114.8					aveNOG[1]	0A0CA@biNOG,0DMZ3@chorNOG,0IGTG@euNOG,0MV2A@fiNOG,0VB8E@meNOG,0XQHJ@NOG,13AZV@opiNOG,1CWV2@veNOG	0IGTG|2.7e-33|119.4	S	Chromosome 3 open reading frame 70
g_1512	9103.ENSMGAP00000001819	3.9e-289	952.4	EHHADH				aveNOG[1]	04KDU@aveNOG,09U00@biNOG,0DF9T@chorNOG,0V4YU@meNOG,12NGA@opiNOG,1CPZG@veNOG,COG1024@NOG,COG1250@NOG,KOG1683@euNOG	KOG1683|7.6e-132|445.0	I	Hydroxyacyl-CoA dehydrogenase 3-ketoacyl-CoA thiolase enoyl-CoA hydratase (Trifunctional protein), alpha subunit
g_1516	9103.ENSMGAP00000001861	0	2187.5	MAP3K13				aveNOG[1]	04FTS@aveNOG,09T4E@biNOG,0DEFN@chorNOG,0V434@meNOG,0YKX2@NOG,12N1F@opiNOG,1CP5B@veNOG,KOG4721@euNOG	KOG4721|6.5e-218|729.9	T	mitogen-activated protein kinase kinase kinase
g_1517	59729.ENSTGUP00000007154	4.1e-149	482.2	TMEM41A				aveNOG[1]	04EVU@aveNOG,0A2DZ@biNOG,0DQ1A@chorNOG,0VD9Q@meNOG,12Y50@opiNOG,1CZ1Y@veNOG,COG0398@NOG,KOG3140@euNOG	04EVU|7.1e-155|517.9	S	SNARE associated Golgi protein
g_1518	9031.ENSGALP00000010724	5.4e-299	983.8	LIPH				aveNOG[1]	04HUM@aveNOG,09VMF@biNOG,0DGVX@chorNOG,0IKYJ@euNOG,0V6KJ@meNOG,11AHY@NOG,13MJ9@opiNOG,1CRK5@veNOG	0IKYJ|2.6e-197|660.2	O	lipase, member
g_1519	59463.ENSMLUP00000021187	7.8e-50	157.9					aveNOG[1]	0A9I9@biNOG,0DVP3@chorNOG,0J0AV@euNOG,0UW9F@maNOG,0VKFH@meNOG,11UJR@NOG,13V7G@opiNOG,1D4ZD@veNOG	0J0AV|1.9e-35|126.4	D	anaphase promoting complex subunit 13
g_1520	9103.ENSMGAP00000001948	0	1378.1	CEP63	GO:0000075,GO:0000077,GO:0000226,GO:0000922,GO:0005575,GO:0005622,GO:0005623,GO:0005813,GO:0005815,GO:0005819,GO:0005856,GO:0006461,GO:0006950,GO:0006974,GO:0006996,GO:0007010,GO:0007017,GO:0007049,GO:0007051,GO:0007154,GO:0007165,GO:0008150,GO:0009987,GO:0010564,GO:0010948,GO:0015630,GO:0016043,GO:0022402,GO:0022607,GO:0023052,GO:0031570,GO:0032991,GO:0033554,GO:0035556,GO:0042770,GO:0043226,GO:…			aveNOG[1]	04HV6@aveNOG,09XIE@biNOG,0DIVV@chorNOG,0IFN5@euNOG,0V8GJ@meNOG,11HAY@NOG,13JT4@opiNOG,1CTMA@veNOG	0IFN5|3.7e-289|965.0	Z	Centrosomal protein 63kDa
g_1521	9031.ENSGALP00000040409	0	1405.8	KY				aveNOG[1]	04IMF@aveNOG,0A4AX@biNOG,0DR9W@chorNOG,0VF5J@meNOG,13IWY@opiNOG,1CZYU@veNOG,COG5279@NOG,KOG4575@euNOG	KOG4575|3.7e-106|360.3	D	Kyphoscoliosis peptidase
g_1523	9031.ENSGALP00000010654	0	2195.7	EPHB1	GO:0000902,GO:0000904,GO:0003008,GO:0003674,GO:0003824,GO:0004672,GO:0004713,GO:0004714,GO:0004871,GO:0004872,GO:0004888,GO:0005003,GO:0005005,GO:0005575,GO:0005622,GO:0005623,GO:0005737,GO:0005768,GO:0005769,GO:0005886,GO:0005887,GO:0006464,GO:0006468,GO:0006793,GO:0006796,GO:0006928,GO:0006935,GO:0007154,GO:0007155,GO:0007163,GO:0007165,GO:0007166,GO:0007167,GO:0007169,GO:0007267,GO:0007268,GO:…			aveNOG[1]	04N7U@aveNOG,09T3T@biNOG,0DEEW@chorNOG,0V42J@meNOG,12PWI@opiNOG,1CRCN@veNOG,COG0515@NOG,KOG0196@euNOG	04N7U|0.0|2252.1	T	EPH_lbd
g_1524	9031.ENSGALP00000010639	3.1e-238	784	A4GNT				aveNOG[1]	04FJK@aveNOG,0A1RI@biNOG,0DPDT@chorNOG,0V8JX@meNOG,11PD8@NOG,12NA9@opiNOG,1CUE8@veNOG,KOG1928@euNOG	KOG1928|5.4e-63|217.0	G	lactosylceramide
g_1525	9031.ENSGALP00000010634	2.5e-204	672.3					aveNOG[1]	09T90@biNOG,0DEK6@chorNOG,0IJJY@euNOG,0V480@meNOG,11HTD@NOG,13INY@opiNOG,1CPA4@veNOG	0IJJY|1.6e-100|341.9	S	DAZ interacting protein
g_1526	9031.ENSGALP00000010630	2.6e-179	585.6	CLDN18		K06087		aveNOG[1]	04MYD@aveNOG,09VFE@biNOG,0DGQ8@chorNOG,0IG28@euNOG,0V6EK@meNOG,0XPD1@NOG,12RRG@opiNOG,1CRE3@veNOG	0IG28|2e-147|493.9	U	claudin 18
g_1527	61853.ENSNLEP00000004999	1.5e-45	144.1					aveNOG[1]	09VFE@biNOG,0DGQ8@chorNOG,0IG28@euNOG,0UIJ3@maNOG,0V6EK@meNOG,0XPD1@NOG,12RRG@opiNOG,165CP@prNOG,1B0DK@spriNOG,1CRE3@veNOG	0IG28|9.5e-43|150.7	U	claudin 18
g_1530	30608.ENSMICP00000012555	3.3e-164	531.3					aveNOG[1]	0B02I@biNOG,0E5JC@chorNOG,0KD1V@euNOG,0V119@maNOG,0WCJ3@meNOG,115Y8@NOG,14T7V@opiNOG,1B9Y2@spriNOG,1DCJ9@veNOG	0KD1V|8e-168|559.7	K	SRY (sex determining region Y)-box 14
g_1532	13616.ENSMODP00000038871	2.8e-65	212.4					aveNOG[1]	0A5PR@biNOG,0DS2U@chorNOG,0UXP4@maNOG,0VGZT@meNOG,13NMG@opiNOG,1D2KS@veNOG,COG2801@NOG,KOG0017@euNOG	0VGZT|2.6e-135|456.5	L	Inherit from KOG: Retrotransposon protein
g_1533	9031.ENSGALP00000032870	5.4e-131	425.4	CRYGS				aveNOG[1]	04GBH@aveNOG,0A30X@biNOG,0DQNF@chorNOG,0IEJ7@euNOG,0VDVY@meNOG,11EVU@NOG,13EU7@opiNOG,1CZRA@veNOG	0IEJ7|1.3e-99|334.9	S	Crystallin, gamma S
g_1534	9031.ENSGALP00000010585	0	1275.1	TBCCD1	GO:0000922,GO:0005575,GO:0005622,GO:0005623,GO:0005819,GO:0005856,GO:0015630,GO:0032991,GO:0043226,GO:0043228,GO:0043229,GO:0043232,GO:0043234,GO:0044422,GO:0044424,GO:0044430,GO:0044446,GO:0044464	K16810		aveNOG[1]	04MUQ@aveNOG,0A30E@biNOG,0DQN0@chorNOG,0VDVI@meNOG,0XRXF@NOG,12VP6@opiNOG,1CZQS@veNOG,KOG4416@euNOG	KOG4416|5.1e-137|462.3	S	TBCC domain containing 1
g_1535	9031.ENSGALP00000010583	4.2e-251	826.3	DNAJB11		K09517		aveNOG[1]	04H6K@aveNOG,09U8B@biNOG,0DFI5@chorNOG,0V57F@meNOG,12Q8R@opiNOG,1CQ7X@veNOG,COG0484@NOG,KOG0713@euNOG	KOG0713|4e-76|260.7	O	DnaJ (Hsp40) homolog, subfamily B, member 11
g_1536	9031.ENSGALP00000010561	2.6e-136	443.6	PROCR		K06557		aveNOG[1]	04J5E@aveNOG,0A3VY@biNOG,0DRFT@chorNOG,0IWW5@euNOG,0VEQK@meNOG,116AV@NOG,13Q2F@opiNOG,1D0N4@veNOG	0IWW5|4.8e-83|282.3	T	protein C receptor, endothelial
g_1537	9606.ENSP00000269848	0	1575					aveNOG[1]	09U07@biNOG,0DFA0@chorNOG,0RUBG@homNOG,0UH6S@maNOG,0V4Z1@meNOG,12PSE@opiNOG,16FJP@prNOG,1B29Z@spriNOG,1CPZP@veNOG,COG0205@NOG,KOG2440@euNOG	16FJP|0.0|1659.8	G	phosphofructokinase, liver
g_1538	9031.ENSGALP00000010549	4.5e-167	546.3					aveNOG[1]	04N5Q@aveNOG,09X22@biNOG,0DICQ@chorNOG,0V807@meNOG,0Y9AE@NOG,13KJG@opiNOG,1CT37@veNOG,KOG2123@euNOG	KOG2123|5.6e-88|298.8	S	Chromosome 21 open reading frame 2
g_1541	9103.ENSMGAP00000002543	0	1118.3			K17392		aveNOG[1]	04FFB@aveNOG,09XGB@biNOG,0DITV@chorNOG,0V8ED@meNOG,0ZKB4@NOG,12QIR@opiNOG,1CTJ6@veNOG,KOG2193@euNOG	04FFB|0.0|1210.5	A	insulin-like growth factor 2
g_1542	9031.ENSGALP00000040363	8.4e-251	828.3	SENP2				aveNOG[1]	04F98@aveNOG,09YT0@biNOG,0DK7N@chorNOG,0V9QX@meNOG,12RNR@opiNOG,1CV1I@veNOG,COG5160@NOG,KOG0778@euNOG	KOG0778|1.1e-106|361.6	O	specific peptidase
g_1544	9031.ENSGALP00000010467	0	1319.2	AMOTL2				aveNOG[1]	04KVB@aveNOG,09UPC@biNOG,0DFZ2@chorNOG,0IEF3@euNOG,0V5NZ@meNOG,0ZEXZ@NOG,12P38@opiNOG,1CQNH@veNOG	0IEF3|0.0|1135.3	Z	Angiomotin like 2
g_1547	9031.ENSGALP00000010438	0	1393.1	SLCO2A1		K14345		aveNOG[1]	04MTI@aveNOG,09TNP@biNOG,0DIGK@chorNOG,0V4MT@meNOG,0XRSF@NOG,12NAH@opiNOG,1CT74@veNOG,KOG3626@euNOG	KOG3626|3.8e-191|641.1	Q	Solute carrier organic anion transporter family member
g_1548	59729.ENSTGUP00000006814	6.3e-147	480.7					aveNOG[1]	0A2CH@biNOG,0DQ06@chorNOG,0VCUC@meNOG,13REI@opiNOG,1CZ0H@veNOG,COG2229@NOG,KOG0090@euNOG	KOG0090|4.3e-77|263.7	U	Signal recognition particle receptor
g_1549	7739.JGI124962	0	1514.1					aveNOG[1]	09URE@biNOG,0DG15@chorNOG,0IEAI@euNOG,0V5QX@meNOG,0XQ36@NOG,12NWR@opiNOG	0IEAI|1.6e-255|854.4	O	antigen p97 (melanoma associated) identified by monoclonal antibodies 133.2 and 96.5
g_1550	9103.ENSMGAP00000002814	1.9e-222	733.7					aveNOG[1]	04KSK@aveNOG,09YNB@biNOG,0DPI5@chorNOG,0IG5S@euNOG,0VBVS@meNOG,10RXY@NOG,13I27@opiNOG,1CZQ2@veNOG	0IG5S|9.4e-173|579.3	U	Galactose-3-O-sulfotransferase
g_1551	9031.ENSGALP00000010373	9.8e-188	614.5			K09871		aveNOG[1]	04PG3@aveNOG,0A04J@biNOG,0DMQA@chorNOG,0IJA3@euNOG,0VB0U@meNOG,11GCP@NOG,13HDF@opiNOG,1CWJU@veNOG	0IJA3|1.9e-96|326.3	U	Aquaporin
g_1552	13735.ENSPSIP00000006402	1.3e-80	262.8					aveNOG[1]	09VU2@biNOG,0DHBK@chorNOG,0V6ST@meNOG,0XP4K@NOG,12NMX@opiNOG,1CS1Q@veNOG,KOG0578@euNOG	KOG0578|9e-54|187.0	T	p21 protein (Cdc42 Rac)-activated kinase
g_1554	9031.ENSGALP00000010332	7.9e-139	452.6	PIGX				aveNOG[1]	04HAU@aveNOG,0A0EF@biNOG,0DN1A@chorNOG,0IGQT@euNOG,0VBAS@meNOG,0Y4AX@NOG,12ST6@opiNOG,1CWXJ@veNOG	0IGQT|8.9e-85|289.0	G	Phosphatidylinositol glycan anchor biosynthesis, class X
g_1555	9103.ENSMGAP00000002900	2.4e-107	347.7	CEP19		K16801		aveNOG[1]	04PR2@aveNOG,09ZUK@biNOG,0DMD1@chorNOG,0IWEE@euNOG,0VAR4@meNOG,11MS1@NOG,13QFH@opiNOG,1CW8A@veNOG	0IWEE|2.6e-68|232.8	S	centrosomal protein 19kDa
g_1556	9103.ENSMGAP00000002908	0	1432.9	LRRC33				aveNOG[1]	04P3T@aveNOG,09WF1@biNOG,0DHQE@chorNOG,0V7DK@meNOG,12PGA@opiNOG,1CSER@veNOG,COG4886@NOG,KOG0619@euNOG	04P3T|0.0|1482.9	T	LRR_TYP
g_1557	9031.ENSGALP00000010315	1.7e-188	618.3	FBXO45		K10319		aveNOG[1]	04ENP@aveNOG,09XID@biNOG,0DIVT@chorNOG,0V62M@meNOG,0XQC1@NOG,12XAR@opiNOG,1CTM8@veNOG,KOG3953@euNOG	KOG3953|8.5e-101|342.3	J	splA ryanodine receptor domain and SOCS box containing
g_1558	9031.ENSGALP00000010311	6.7e-228	747.9	WDR53				aveNOG[1]	04MWP@aveNOG,0A1WW@biNOG,0DPJ0@chorNOG,0IHTZ@euNOG,0VCSE@meNOG,11IGI@NOG,13M6B@opiNOG,1CYHM@veNOG	0IHTZ|3.6e-99|336.3	S	WD repeat domain 53
g_1561	9031.ENSGALP00000010298	5.8e-233	765.9	UBXN7				aveNOG[1]	04NCN@aveNOG,09Z2D@biNOG,0DKHS@chorNOG,0V9ZV@meNOG,0XSZZ@NOG,13IAT@opiNOG,1CVBT@veNOG,KOG0260@euNOG,KOG1364@euNOG	KOG1364|8e-86|292.9	O	UBX domain protein
g_1562	9031.ENSGALP00000010287	7.4e-131	425.8	TM4SF19				aveNOG[1]	04PEY@aveNOG,09ZQQ@biNOG,0DM8K@chorNOG,0IJUZ@euNOG,0VAM7@meNOG,11996@NOG,13IRH@opiNOG,1CW3R@veNOG	0IJUZ|2.3e-74|253.6	U	Transmembrane 4 L six family member 19
g_1563	9103.ENSMGAP00000003009	2.4e-303	998.8					aveNOG[1]	04F4C@aveNOG,09YDG@biNOG,0DGG2@chorNOG,0IFVF@euNOG,0VAZB@meNOG,0Y74Z@NOG,12RDV@opiNOG,1CR5Q@veNOG	0IFVF|2.1e-195|654.1	S	sialidase
g_1564	9031.ENSGALP00000010257	3.2e-268	882.2	GAL3ST2				aveNOG[1]	04HE7@aveNOG,09YNB@biNOG,0DPI5@chorNOG,0IG5S@euNOG,0VBVS@meNOG,10RXY@NOG,13I27@opiNOG,1CZQ2@veNOG	0IG5S|3.7e-162|544.3	U	Galactose-3-O-sulfotransferase
g_1565	9031.ENSGALP00000010244	0	1074.4	D2HGDH				aveNOG[1]	04KKI@aveNOG,09YMD@biNOG,0DK1V@chorNOG,0V9J4@meNOG,12TMG@opiNOG,1CUVP@veNOG,COG0277@NOG,KOG1232@euNOG	04KKI|0.0|1101.8	C	D-2-hydroxyglutarate dehydrogenase
g_1566	9031.ENSGALP00000010199	8.9e-166	544.7	ING5		K11345		aveNOG[1]	04JZK@aveNOG,09W7W@biNOG,0DHGY@chorNOG,0V768@meNOG,12PS3@opiNOG,1CS7A@veNOG,COG5034@NOG,KOG1973@euNOG	KOG1973|9.3e-41|143.8	B	Inhibitor of growth family member
g_1567	9031.ENSGALP00000010180	7.9e-114	371.6	DTYMK		K00943		aveNOG[1]	04I7V@aveNOG,09TX7@biNOG,0DMZB@chorNOG,0VB8R@meNOG,13R6H@opiNOG,1CWVH@veNOG,COG0125@NOG,KOG3327@euNOG	KOG3327|3.1e-82|281.4	F	thymidylate kinase
g_1568	9103.ENSMGAP00000003134	1.5e-224	731.5	ATG4B	GO:0005575,GO:0005622,GO:0005623,GO:0005737,GO:0044424,GO:0044464	K08342		aveNOG[1]	04NWT@aveNOG,09XZJ@biNOG,0DJQM@chorNOG,0V8X9@meNOG,0XPQ0@NOG,12QUI@opiNOG,1CYD8@veNOG,KOG2674@euNOG	04NWT|2.3e-225|751.8	O	Peptidase family C54
g_1570	9103.ENSMGAP00000003142	0	1135	THAP4				aveNOG[1]	04IID@aveNOG,09XPS@biNOG,0DJ1H@chorNOG,0V8MF@meNOG,11TBC@NOG,12QNT@opiNOG,1CTT1@veNOG,KOG3371@euNOG	KOG3371|2.2e-54|188.6	S	THAP domain containing 4
g_1571	13616.ENSMODP00000019870	3.5e-134	438.8					aveNOG[1]	09VNS@biNOG,0DGX4@chorNOG,0UNR7@maNOG,0V6MM@meNOG,12RJ2@opiNOG,1CRMD@veNOG,COG0666@NOG,KOG0504@euNOG	0UNR7|9.6e-158|531.2	S	espin-like
g_1572	9031.ENSGALP00000010104	0	1206.7	KLHL30				aveNOG[1]	04FSZ@aveNOG,0A150@biNOG,0DNSY@chorNOG,0VC1A@meNOG,0XNX8@NOG,13MCV@opiNOG,1CXQ5@veNOG,KOG4441@euNOG	04FSZ|0.0|1340.6	T	BACK
g_1573	9031.ENSGALP00000010092	5.6e-261	852.6	ILKAP		K17500		aveNOG[1]	04IIH@aveNOG,09XJV@biNOG,0DIXG@chorNOG,0V8HT@meNOG,12T24@opiNOG,1CTNZ@veNOG,COG0631@NOG,KOG0698@euNOG	04IIH|3.7e-268|892.9	T	integrin-linked kinase-associated serine threonine phosphatase
g_1575	9615.ENSCAFP00000018702	0	3694.5					aveNOG[1]	09Y8U@biNOG,0CJQF@carNOG,0DFGB@chorNOG,0URPM@maNOG,0V8TH@meNOG,12QSJ@opiNOG,1CX9X@veNOG,COG5059@NOG,KOG0245@euNOG	0CJQF|0.0|3922.4	Z	Kinesin protein 1B
g_1577	9031.ENSGALP00000032984	6.7e-259	846.2	AGXT		K00830		aveNOG[1]	04I6M@aveNOG,09W03@biNOG,0DH96@chorNOG,0V6YI@meNOG,12T0Y@opiNOG,1CRZ5@veNOG,COG0075@NOG,KOG2862@euNOG	04I6M|1.4e-251|838.2	E	Aminotransferase class-V
g_1578	9031.ENSGALP00000009723	3.7e-286	939.5					aveNOG[1]	04MS0@aveNOG,09XRV@biNOG,0DJ42@chorNOG,0IEX3@euNOG,0V8PK@meNOG,0YC9H@NOG,12QQ0@opiNOG,1CTVY@veNOG	0IEX3|4.7e-194|649.1	S	chromosome 2 open reading frame 54
g_1579	9031.ENSGALP00000009711	0	2680.9	SNED1				aveNOG[1]	04QWM@aveNOG,0B4Z1@biNOG,0E8KI@chorNOG,0WHIN@meNOG,0ZK2K@NOG,13DW8@opiNOG,1DFIC@veNOG,KOG1217@euNOG,KOG4291@euNOG	04QWM|0.0|2810.0	W	sushi, nidogen and EGF-like domains 1
g_1580	13735.ENSPSIP00000017110	6.3e-77	250.9					aveNOG[1]	0A140@biNOG,0DPMT@chorNOG,0IK50@euNOG,0VCV1@meNOG,0Y0Q1@NOG,13HVH@opiNOG,1CYKQ@veNOG	0IK50|4.1e-84|286.0	S	MTERF domain containing 2
g_1582	9103.ENSMGAP00000003400	7.8e-223	725.9	PPP1R7		K17550		aveNOG[1]	04GQA@aveNOG,09VAF@biNOG,0DGIU@chorNOG,0V69R@meNOG,13IS7@opiNOG,1CR8M@veNOG,COG4886@NOG,KOG0531@euNOG	04GQA|8.8e-215|715.8	T	protein phosphatase 1, regulatory
g_1583	9031.ENSGALP00000009341	0	2802.5	HDLBP	GO:0005575,GO:0005622,GO:0005623,GO:0005737,GO:0044424,GO:0044464			aveNOG[1]	04F0V@aveNOG,09VZ7@biNOG,0DH7Z@chorNOG,0V6XM@meNOG,0XQFV@NOG,12P80@opiNOG,1CRY3@veNOG,KOG2208@euNOG	KOG2208|1.6e-222|744.7	A	High density lipoprotein binding protein
g_1589	9031.ENSGALP00000009285	0	1818.7	FARP2		K06082		aveNOG[1]	04KGC@aveNOG,09YIF@biNOG,0DMWT@chorNOG,0V88Q@meNOG,0XP7Q@NOG,12QVW@opiNOG,1CYJK@veNOG,KOG3531@euNOG	KOG3531|1e-271|907.9	T	and pleckstrin domain protein
g_1590	9031.ENSGALP00000033027	3.4e-296	976.8	STK25		K08838		aveNOG[1]	04GRD@aveNOG,09YGK@biNOG,0DJWU@chorNOG,0V9ED@meNOG,0XP9G@NOG,12PRV@opiNOG,1CVPG@veNOG,KOG0201@euNOG	KOG0201|1.5e-181|610.0	T	serine threonine kinase
g_1592	9031.ENSGALP00000009257	1.5e-142	467	BOK		K02561		aveNOG[1]	04NDU@aveNOG,0A0E9@biNOG,0DMRN@chorNOG,0VBAI@meNOG,123S0@NOG,12SSX@opiNOG,1CWMA@veNOG,KOG4728@euNOG	KOG4728|2.8e-37|132.3	T	bcl-2-related
g_1593	9031.ENSGALP00000009251	0	1191.4	ETV5		K15593		aveNOG[1]	04N8H@aveNOG,09WFK@biNOG,0DM5P@chorNOG,0VAIM@meNOG,0Z0ZF@NOG,12SGW@opiNOG,1CW0S@veNOG,KOG3806@euNOG	KOG3806|5.3e-76|260.7	K	ets variant
g_1594	9031.ENSGALP00000009166	0	1780.5					aveNOG[1]	09X4J@biNOG,0DIFK@chorNOG,0V832@meNOG,0XQVB@NOG,12QU6@opiNOG,1CT6B@veNOG,KOG1169@euNOG	KOG1169|9.2e-198|662.2	I	diacylglycerol kinase
g_1597	30611.ENSOGAP00000005000	1.1e-29	95.7					aveNOG[1]	0A7S0@biNOG,0DUHI@chorNOG,0IXF7@euNOG,0UVHR@maNOG,0VIKF@meNOG,11WR4@NOG,13RGJ@opiNOG,16HS1@prNOG,1B5W3@spriNOG,1D3V9@veNOG	0IXF7|3.3e-17|66.3	U	Pituitary tumor-transforming 1 interacting protein
g_1598	9031.ENSGALP00000033053	3.7e-63	204.5					aveNOG[1]	0A8AV@biNOG,0DUXD@chorNOG,0VJ7I@meNOG,13UDA@opiNOG,1D489@veNOG,COG5227@NOG,KOG1769@euNOG	KOG1769|8.1e-52|180.7	O	smt3 suppressor of mif two 3 homolog
g_1600	9031.ENSGALP00000009058	0	1532.3	TSPEAR				aveNOG[1]	04QYX@aveNOG,0B5JC@biNOG,0E8Z0@chorNOG,0IS7E@euNOG,0WI6X@meNOG,0Y3VC@NOG,13EUQ@opiNOG,1DFVC@veNOG	04QYX|0.0|1547.6	W	thrombospondin-type laminin G domain and EAR repeats
g_1601	9031.ENSGALP00000009021	0	3467.4	TRPM2		K04977		aveNOG[1]	04MF6@aveNOG,09TUG@biNOG,0DF4T@chorNOG,0V4TP@meNOG,0XR5B@NOG,12RHT@opiNOG,1CPUM@veNOG,KOG3614@euNOG,KOG4195@euNOG	04MF6|0.0|3543.5	P	transient receptor potential cation channel, subfamily M, member
g_1603	9031.ENSGALP00000040203	5.6e-39	123.6					aveNOG[1]	04QGT@aveNOG,0A9D9@biNOG,0DVJT@chorNOG,0J2XA@euNOG,0VKA8@meNOG,122J4@NOG,13WFI@opiNOG,1D4W9@veNOG	0J2XA|2.5e-31|111.0	S	otospiralin
g_1604	9103.ENSMGAP00000003857	9.6e-150	488.3	ADIPOQ		K07296		aveNOG[1]	04M0S@aveNOG,09TK4@biNOG,0DEWT@chorNOG,0IHSJ@euNOG,0V4J4@meNOG,11F5K@NOG,12NB1@opiNOG,1CPKB@veNOG	0IHSJ|2.5e-118|397.3	W	adiponectin, C1Q and collagen domain containing
g_1605	9103.ENSMGAP00000003857	1.3e-163	533.7	ADIPOQ		K07296		aveNOG[1]	04M0S@aveNOG,09TK4@biNOG,0DEWT@chorNOG,0IHSJ@euNOG,0V4J4@meNOG,11F5K@NOG,12NB1@opiNOG,1CPKB@veNOG	0IHSJ|6e-123|412.5	W	adiponectin, C1Q and collagen domain containing
g_1607	9103.ENSMGAP00000018544	3.4e-285	932.7	ST6GAL1	GO:0000139,GO:0005575,GO:0005576,GO:0005622,GO:0005623,GO:0005737,GO:0005794,GO:0005795,GO:0012505,GO:0016020,GO:0031090,GO:0031984,GO:0031985,GO:0032580,GO:0043226,GO:0043227,GO:0043229,GO:0043231,GO:0044422,GO:0044424,GO:0044431,GO:0044444,GO:0044446,GO:0044464	K00778		aveNOG[1]	04EKF@aveNOG,0A32H@biNOG,0DGM7@chorNOG,0VCMN@meNOG,0XT8P@NOG,12RUZ@opiNOG,1CQ12@veNOG,KOG2692@euNOG	04EKF|7e-288|957.6	G	beta-galactoside alpha-2,6-sialyltransferase
g_1608	9103.ENSMGAP00000016922	5.1e-184	599					aveNOG[1]	04MIZ@aveNOG,0A82K@biNOG,0DUS5@chorNOG,0IXPA@euNOG,0VIN6@meNOG,11JQX@NOG,13S31@opiNOG,1D3UR@veNOG	0IXPA|7.3e-157|525.1	S	7 transmembrane receptor (rhodopsin family)
g_1609	9031.ENSGALP00000008871	9.6e-157	513.3	ITM2C		K18265		aveNOG[1]	04GJ7@aveNOG,09VQN@biNOG,0DGZ9@chorNOG,0V6PP@meNOG,0XRNN@NOG,12PF0@opiNOG,1CRPF@veNOG,KOG4681@euNOG	KOG4681|1.1e-111|377.7	S	integral membrane protein
g_1612	28377.ENSACAP00000020312	2e-75	248.7					aveNOG[1]	0A3D1@biNOG,0DR0C@chorNOG,0VE7S@meNOG,11F0X@NOG,13PCI@opiNOG,1D04N@veNOG,KOG4304@euNOG	KOG4304|7.4e-33|117.7	K	Hairy and enhancer of split
g_1624	9031.ENSGALP00000033127	2.7e-218	710.5	FOXL2	GO:0000003,GO:0000737,GO:0000981,GO:0001071,GO:0001541,GO:0001654,GO:0002074,GO:0003006,GO:0003674,GO:0003676,GO:0003677,GO:0003690,GO:0003700,GO:0003705,GO:0005102,GO:0005488,GO:0005515,GO:0005575,GO:0005622,GO:0005623,GO:0005634,GO:0005654,GO:0005667,GO:0006139,GO:0006259,GO:0006308,GO:0006309,GO:0006351,GO:0006355,GO:0006357,GO:0006366,GO:0006725,GO:0006807,GO:0006915,GO:0006917,GO:0006921,GO:…	K09405		aveNOG[1]	04NFV@aveNOG,0A2S3@biNOG,0DNSS@chorNOG,0VDMQ@meNOG,13M1Z@opiNOG,1CXQ0@veNOG,COG5025@NOG,KOG2294@euNOG	04NFV|6.8e-216|719.1	K	FH
g_1628	9103.ENSMGAP00000004163	3.6e-199	653.4	MRPS22				aveNOG[1]	04MZ0@aveNOG,0A0GJ@biNOG,0DN3P@chorNOG,0VBCT@meNOG,11I44@NOG,13I59@opiNOG,1CX01@veNOG,KOG3890@euNOG	KOG3890|3.3e-118|400.0	J	mitochondrial ribosomal protein s22
g_1633	9103.ENSMGAP00000004393	1.8e-167	548.9					aveNOG[1]	0XQC1@NOG,KOG3953@euNOG	KOG3953|6.2e-127|428.5	J	splA ryanodine receptor domain and SOCS box containing
g_1638	13735.ENSPSIP00000001512	2.1e-136	444.7					aveNOG[1]	0A5RU@biNOG,0DUMB@chorNOG,0VGNY@meNOG,0Y65V@NOG,13JGH@opiNOG,1D7IQ@veNOG,KOG1075@euNOG	1D7IQ|2.4e-144|486.4	S	Reverse transcriptase (RNA-dependent DNA polymerase)
g_1643	10090.ENSMUSP00000126384	6.5e-28	86.4					aveNOG[1]	0ANB0@biNOG,0E2X4@chorNOG,0JEFK@euNOG,0UYUF@maNOG,0W08B@meNOG,0YPY4@NOG,14734@opiNOG,1B8DN@spriNOG,1DAAW@veNOG	0JEFK|2.2e-19|73.5	S	NA
g_1645	9478.ENSTSYP00000012122	1.9e-198	646.2					aveNOG[1]	09T3T@biNOG,0DEEW@chorNOG,0UNNC@maNOG,0V42J@meNOG,12PWI@opiNOG,16BS1@prNOG,1B4AC@spriNOG,1CP4M@veNOG,COG0515@NOG,KOG0196@euNOG	16BS1|6.8e-214|716.6	T	EPH receptor A4
g_1646	9031.ENSGALP00000008426	3e-118	381.2	EPHA4	GO:0003674,GO:0003824,GO:0004672,GO:0004713,GO:0004714,GO:0004871,GO:0004872,GO:0004888,GO:0005003,GO:0005004,GO:0005005,GO:0005488,GO:0005515,GO:0005575,GO:0005622,GO:0005623,GO:0005737,GO:0005768,GO:0005769,GO:0005886,GO:0005887,GO:0006140,GO:0006464,GO:0006468,GO:0006793,GO:0006796,GO:0007154,GO:0007165,GO:0007166,GO:0007167,GO:0007169,GO:0007275,GO:0007399,GO:0007413,GO:0008037,GO:0008038,GO:…	K05105		aveNOG[1]	04MXD@aveNOG,09T3T@biNOG,0DEEW@chorNOG,0V42J@meNOG,12PWI@opiNOG,1CP4M@veNOG,COG0515@NOG,KOG0196@euNOG	04MXD|1.2e-115|391.2	T	EPH_lbd
g_1647	43179.ENSSTOP00000002692	1.5e-183	597.2					aveNOG[1]	09T3T@biNOG,0DEEW@chorNOG,0UNNC@maNOG,0V42J@meNOG,12PWI@opiNOG,18W05@roNOG,1B4AC@spriNOG,1CP4M@veNOG,COG0515@NOG,KOG0196@euNOG	18W05|7.3e-196|656.9	T	EPH receptor A4
g_1651	9796.ENSECAP00000018795	4.9e-63	206.2					aveNOG[1]	09TPH@biNOG,0DEZW@chorNOG,0UTPZ@maNOG,0V4NP@meNOG,0ZT0S@NOG,12NAX@opiNOG,1CPPP@veNOG,KOG3862@euNOG	12NAX|3.7e-86|294.4	K	Paired box
g_1655	7897.ENSLACP00000006461	1.2e-85	276.1					aveNOG[1]	0B682@biNOG,0E9DA@chorNOG,0ITCY@euNOG,0WIXW@meNOG,11GI0@NOG,13FVU@opiNOG,1DG8M@veNOG	0ITCY|7.9e-96|324.4	O	Zinc finger, C3HC4 type (RING finger)
g_1657	9305.ENSSHAP00000002432	6.7e-60	192.1					aveNOG[1]	0B4PQ@biNOG,0IQK7@euNOG,0WH80@meNOG,0ZM1I@NOG,13DF8@opiNOG	0IQK7|6.9e-80|272.8	I	sphingosine-1-phosphate phosphatase
g_1660	9031.ENSGALP00000033220	6.4e-104	335.3	KCNE4		K04898		aveNOG[1]	04HVJ@aveNOG,0A1WE@biNOG,0DSUW@chorNOG,0IWSX@euNOG,0VG7B@meNOG,129VY@NOG,13QQA@opiNOG,1CYPP@veNOG	0IWSX|1.3e-80|272.5	P	potassium voltage-gated channel, Isk-related family, member 4
g_1662	9103.ENSMGAP00000016932	0	1348.2	SCG2				aveNOG[1]	04G6A@aveNOG,09UB0@biNOG,0DFKP@chorNOG,0IFXN@euNOG,0V5A6@meNOG,11F4G@NOG,13M64@opiNOG,1CQAB@veNOG	0IFXN|2.2e-234|783.5	T	Secretogranin II
g_1664	28377.ENSACAP00000004440	6e-27	86.5					aveNOG[1]	09UYS@biNOG,0DG89@chorNOG,0V5YN@meNOG,12P6B@opiNOG,1CQXQ@veNOG,COG2319@NOG,KOG1409@euNOG	KOG1409|4.5e-06|28.9	S	WD repeat and FYVE domain containing
g_1667	9031.ENSGALP00000008206	1.8e-165	542.6					aveNOG[1]	0A16N@biNOG,0DNUC@chorNOG,0IIF9@euNOG,0VC2I@meNOG,0YA6D@NOG,13JD7@opiNOG,1CXRP@veNOG	0IIF9|1.9e-147|496.0	S	family with sequence similarity 124B
g_1670	9031.ENSGALP00000008123	2.4e-122	392.9	GUCY1B2				aveNOG[1]	04IS3@aveNOG,0A1DS@biNOG,0DRMU@chorNOG,0V5S9@meNOG,12NXE@opiNOG,1D0UZ@veNOG,COG2114@NOG,KOG4171@euNOG	04IS3|3.2e-125|422.7	F	Guanylate cyclase
g_1672	9103.ENSMGAP00000005057	4.1e-292	959.7	DOCK10				aveNOG[1]	04ICK@aveNOG,09TRY@biNOG,0DF2B@chorNOG,0V443@meNOG,0XNVY@NOG,12PHF@opiNOG,1CWCK@veNOG,KOG1997@euNOG	1CWCK|0.0|1065.5	T	Dedicator of cytokinesis 10
g_1680	28377.ENSACAP00000003729	0	1556.8					aveNOG[1]	09Y4H@biNOG,0DMID@chorNOG,0IXEK@euNOG,0V920@meNOG,0Z9EP@NOG,13S7P@opiNOG,1CUA6@veNOG	0IXEK|1.8e-235|788.2	T	insulin receptor substrate
g_1683	9031.ENSGALP00000007904	2.3e-283	928.1	COL4A4				aveNOG[1]	04QKM@aveNOG,0B0G4@biNOG,0E5WP@chorNOG,0WCZA@meNOG,0YAVF@NOG,14TNU@opiNOG,1DCW6@veNOG,KOG3544@euNOG	04QKM|5.2e-191|640.6	W	C4
g_1685	9031.ENSGALP00000004912	0	1339.7					aveNOG[1]	0B0G3@biNOG,0E5WN@chorNOG,0WCZ9@meNOG,112UR@NOG,14TNT@opiNOG,1DCW5@veNOG,KOG3544@euNOG	0E5WN|3.1e-248|830.5	W	collagen, type IV, alpha 3 (Goodpasture antigen)
g_1687	9031.ENSGALP00000004833	8.5e-214	700.7	MRPL44		K17425		aveNOG[1]	04R4K@aveNOG,0B6U8@biNOG,0E9S9@chorNOG,0IUHB@euNOG,0WJKD@meNOG,0XS28@NOG,13GT4@opiNOG,1DGKF@veNOG	0IUHB|5.4e-127|427.2	J	mitochondrial ribosomal protein L44
g_1688	7955.ENSDARP00000087114	2.2e-34	107.7					aveNOG[1]	0B6VQ@biNOG,0E9SY@chorNOG,0IUM7@euNOG,0WJN1@meNOG,11FWA@NOG,13GVQ@opiNOG,1DGM4@veNOG	0IUM7|1.4e-31|113.8	T	ArfGAP with FG repeats
g_1689	9031.ENSGALP00000004772	2.1e-254	838.1	SLC19A3		K14610		aveNOG[1]	04EK6@aveNOG,09XUU@biNOG,0DMFP@chorNOG,0VATN@meNOG,0XT34@NOG,12SU3@opiNOG,1CTIA@veNOG,KOG3810@euNOG	KOG3810|3.1e-158|531.7	P	Solute carrier family 19
g_1690	9031.ENSGALP00000004773	5.4e-300	989.2	SLC19A3		K14610		aveNOG[1]	04EK6@aveNOG,09XUU@biNOG,0DMFP@chorNOG,0VATN@meNOG,0XT34@NOG,12SU3@opiNOG,1CTIA@veNOG,KOG3810@euNOG	KOG3810|5.2e-192|643.3	P	Solute carrier family 19
g_1693	9031.ENSGALP00000004678	7e-104	337.3					aveNOG[1]	09W34@biNOG,0DHCA@chorNOG,0V71G@meNOG,0YZ8H@NOG,12PNS@opiNOG,1CS2E@veNOG,KOG4448@euNOG	KOG4448|1.4e-44|157.0	S	family with sequence similarity 43, member
g_1695	7739.JGI99311	1.2e-32	108.1					aveNOG[1]	09TVI@biNOG,0DGIQ@chorNOG,0V4PR@meNOG,0XP6K@NOG,12NZS@opiNOG,KOG1217@euNOG	12NZS|2.3e-08|36.6	T	Notch ligand involved in the mediation of Notch signaling (By similarity)
g_1704	9031.ENSGALP00000033343	3.1e-39	129.5					aveNOG[1]	0A8W1@biNOG,0DU7K@chorNOG,0VJNC@meNOG,13SGK@opiNOG,1D3JH@veNOG,COG5194@NOG,KOG2930@euNOG	KOG2930|2.4e-16|63.3	O	RinG-box protein
g_1705	9031.ENSGALP00000004421	6.9e-238	782.8	GRK7		K00909		aveNOG[1]	04JM3@aveNOG,09WMG@biNOG,0DQX9@chorNOG,0VE48@meNOG,0YRQZ@NOG,13F1T@opiNOG,1D018@veNOG,KOG0986@euNOG	KOG0986|1.7e-144|487.1	T	g protein-coupled receptor kinase
g_1706	9031.ENSGALP00000004355	1.2e-20	69.1	ATP1B3	GO:0005575,GO:0016020	K01540		aveNOG[1]	04EZE@aveNOG,0A47Z@biNOG,0DQ4U@chorNOG,0VD5E@meNOG,1150A@NOG,12UEF@opiNOG,1D0RW@veNOG,KOG3927@euNOG	KOG3927|7e-06|29.2	P	ATPase, Na K transporting, beta
g_1709	9031.ENSGALP00000004298	6.8e-119	389.3	GK5		K19583		aveNOG[1]	04IPA@aveNOG,09UF8@biNOG,0DFR0@chorNOG,0V5EJ@meNOG,12NQN@opiNOG,1CQEK@veNOG,COG0554@NOG,KOG2517@euNOG	KOG2517|1.5e-35|126.1	G	Glycerol kinase
g_1713	59729.ENSTGUP00000008922	1.6e-85	271.2	TRPC1		K04964		aveNOG[1]	04IAV@aveNOG,09XRD@biNOG,0DKZF@chorNOG,0V7GN@meNOG,0XQ0Y@NOG,130I9@opiNOG,1CVU8@veNOG,KOG3609@euNOG	04IAV|7.9e-85|289.2	P	transient receptor potential cation channel, subfamily C, member 1
g_1716	13735.ENSPSIP00000000412	1.3e-208	689.3					aveNOG[1]	09W6P@biNOG,0DPUE@chorNOG,0VFBX@meNOG,13KUN@opiNOG,1CYTG@veNOG,COG1272@NOG,KOG0748@euNOG	KOG0748|3.8e-56|194.7	T	Progestin and adipoQ receptor family member
g_1721	13735.ENSPSIP00000018527	5.9e-253	831.3					aveNOG[1]	0A1KD@biNOG,0DP8I@chorNOG,0IIA6@euNOG,0VCFY@meNOG,11DKG@NOG,12S9S@opiNOG,1CY6I@veNOG	0IIA6|2.2e-205|686.4	O	Carbohydrate (N-acetylglucosamine-6-O) sulfotransferase 2
g_1724	9031.ENSGALP00000003691	1.3e-147	482.3					aveNOG[1]	04IBW@aveNOG,09ZVM@biNOG,0DME2@chorNOG,0IKM0@euNOG,0VAS2@meNOG,0XR52@NOG,13JQ7@opiNOG,1CW99@veNOG	0IKM0|3.4e-67|230.8	S	chromosome 3 open reading frame 58
g_1725	13616.ENSMODP00000038871	1.4e-67	220					aveNOG[1]	0A5PR@biNOG,0DS2U@chorNOG,0UXP4@maNOG,0VGZT@meNOG,13NMG@opiNOG,1D2KS@veNOG,COG2801@NOG,KOG0017@euNOG	0VGZT|3.6e-135|456.1	L	Inherit from KOG: Retrotransposon protein
g_1733	9031.ENSGALP00000039687	1.5e-222	727.6	ZIC4				aveNOG[1]	04H1D@aveNOG,09TU4@biNOG,0DF4D@chorNOG,0V4TE@meNOG,12RV9@opiNOG,1CPU9@veNOG,COG5048@NOG,KOG1721@euNOG	04H1D|2.2e-227|757.7	K	Zic family member 4
g_1738	9031.ENSGALP00000011000	4.8e-307	1004.8	ZIC1	GO:0005575,GO:0005622,GO:0005623,GO:0005634,GO:0005737,GO:0007275,GO:0007389,GO:0007399,GO:0007417,GO:0007423,GO:0007610,GO:0008150,GO:0008589,GO:0009653,GO:0009790,GO:0009887,GO:0009966,GO:0010646,GO:0021510,GO:0023051,GO:0032501,GO:0032502,GO:0042471,GO:0042472,GO:0043226,GO:0043227,GO:0043229,GO:0043231,GO:0043583,GO:0044424,GO:0044464,GO:0044699,GO:0044707,GO:0044767,GO:0048513,GO:0048562,GO:…	K09224		aveNOG[1]	04FD2@aveNOG,09TU4@biNOG,0DF4D@chorNOG,0V4TE@meNOG,12RV9@opiNOG,1CPU9@veNOG,COG5048@NOG,KOG1721@euNOG	04FD2|0.0|1065.2	K	Zic family member 1
g_1744	9031.ENSGALP00000011061	4.6e-108	354.5			K12883		aveNOG[1]	04IB1@aveNOG,09WJW@biNOG,0DHV6@chorNOG,0V7IH@meNOG,11FJQ@NOG,13PVI@opiNOG,1CSJW@veNOG,KOG0121@euNOG	KOG0121|1.8e-87|298.1	A	Nuclear cap-binding protein subunit
g_1745	7739.JGI124962	0	1927.1					aveNOG[1]	09URE@biNOG,0DG15@chorNOG,0IEAI@euNOG,0V5QX@meNOG,0XQ36@NOG,12NWR@opiNOG	0IEAI|5.9e-159|534.7	O	antigen p97 (melanoma associated) identified by monoclonal antibodies 133.2 and 96.5
g_1746	9823.ENSSSCP00000027227	5.6e-26	79.8					aveNOG[1]	0B5UG@biNOG,0E948@chorNOG,0ISRI@euNOG,0WIH3@meNOG,129XK@NOG,13FAS@opiNOG	0ISRI|2.5e-20|77.2	F	NA
g_1748	9103.ENSMGAP00000007011	8.3e-237	779.7	BDH1	GO:0005575,GO:0005622,GO:0005623,GO:0005737,GO:0005739,GO:0005759,GO:0031974,GO:0043226,GO:0043227,GO:0043229,GO:0043231,GO:0043233,GO:0044422,GO:0044424,GO:0044429,GO:0044444,GO:0044446,GO:0044464,GO:0070013	K00019		aveNOG[1]	04HDH@aveNOG,09TMP@biNOG,0DEY6@chorNOG,0V4HX@meNOG,0Y7FK@NOG,13H77@opiNOG,1CPMV@veNOG,KOG1610@euNOG	KOG1610|1.4e-118|400.6	Q	Dehydrogenase
g_1750	9103.ENSMGAP00000007065	7.6e-171	561.3					aveNOG[1]	09TMP@biNOG,0DEY6@chorNOG,0V4HX@meNOG,0Y7FK@NOG,13H77@opiNOG,1CPMV@veNOG,KOG1610@euNOG	KOG1610|2.3e-89|304.3	Q	Dehydrogenase
g_1751	7091.BGIBMGA004806-TA	1.8e-287	938.5					aveNOG[1]	03B1K@artNOG,0A5RP@biNOG,0SXKR@inNOG,0TCHQ@lepNOG,0VGKW@meNOG,13ZND@opiNOG,COG3040@NOG,KOG4824@euNOG	KOG4824|2.6e-51|177.6	M	Apolipoprotein D
g_1758	9031.ENSGALP00000011410	9.2e-249	811.4	FAM43A				aveNOG[1]	04M37@aveNOG,0A4QA@biNOG,0DK5C@chorNOG,0VFJD@meNOG,0YZ8H@NOG,13J8Y@opiNOG,1CUZ5@veNOG,KOG4448@euNOG	04M37|2e-253|843.5	S	family with sequence similarity 43, member A
g_1760	9031.ENSGALP00000011420	1.6e-202	666	LSG1	GO:0000166,GO:0001882,GO:0001883,GO:0003674,GO:0003824,GO:0003924,GO:0005488,GO:0005525,GO:0005575,GO:0005622,GO:0005623,GO:0005634,GO:0005654,GO:0005737,GO:0005783,GO:0005829,GO:0006139,GO:0006152,GO:0006163,GO:0006184,GO:0006195,GO:0006725,GO:0006753,GO:0006793,GO:0006796,GO:0006807,GO:0006810,GO:0006913,GO:0008150,GO:0008152,GO:0009056,GO:0009116,GO:0009117,GO:0009119,GO:0009141,GO:0009143,GO:…			aveNOG[1]	04H26@aveNOG,09ZJ7@biNOG,0DM2H@chorNOG,0VAG5@meNOG,12TQE@opiNOG,1CVXJ@veNOG,COG1161@NOG,KOG1424@euNOG	KOG1424|1.1e-96|328.5	O	Large subunit GTPase 1
g_1762	9031.ENSGALP00000011493	0	1175.1	LRRC15				aveNOG[1]	04K3K@aveNOG,0A0TI@biNOG,0DNEW@chorNOG,0VBQ5@meNOG,12TES@opiNOG,1CXC6@veNOG,COG4886@NOG,KOG0619@euNOG	04K3K|0.0|1193.5	T	leucine rich repeat containing 15
g_1763	30611.ENSOGAP00000015425	2.5e-126	412.8					aveNOG[1]	0A0TI@biNOG,0DNEW@chorNOG,0UJMY@maNOG,0VBQ5@meNOG,12TES@opiNOG,16C6Y@prNOG,1AV4X@spriNOG,1CXC6@veNOG,COG4886@NOG,KOG0619@euNOG	0UJMY|9.5e-148|496.7	T	carboxypeptidase N, polypeptide 2
g_1765	9103.ENSMGAP00000001300	3.3e-193	630.9					aveNOG[1]	09WHS@biNOG,0DT8W@chorNOG,0V7GC@meNOG,13H9V@opiNOG,1D2K6@veNOG,COG4886@NOG,KOG0619@euNOG	1D2K6|6.8e-113|382.1	T	LRRCT
g_1766	59729.ENSTGUP00000009410	5.9e-162	532.4			K06054		aveNOG[1]	04IW7@aveNOG,09UIM@biNOG,0DFU7@chorNOG,0V5HU@meNOG,11F0X@NOG,12Q7E@opiNOG,1CQHN@veNOG,KOG4304@euNOG	KOG4304|1.4e-56|195.9	K	Hairy and enhancer of split
g_1769	43179.ENSSTOP00000007663	0	1402.8					aveNOG[1]	09TBZ@biNOG,0DEPA@chorNOG,0UFP9@maNOG,0V4B6@meNOG,0XRCA@NOG,12PU6@opiNOG,19278@roNOG,1B3TI@spriNOG,1CPD1@veNOG,KOG0208@euNOG	0UFP9|0.0|1648.9	P	ATPase type
g_1770	9031.ENSGALP00000011632	2.4e-112	363.8					aveNOG[1]	04PNW@aveNOG,0A401@biNOG,0DQYI@chorNOG,0IWFR@euNOG,0VEUY@meNOG,11G30@NOG,13QQ6@opiNOG,1D0SN@veNOG	0IWFR|7.3e-90|304.5	S	HRAS-like suppressor
g_1772	9031.ENSGALP00000011650	0	2997.7					aveNOG[1]	04IM7@aveNOG,09ZF6@biNOG,0DQC2@chorNOG,0V9KB@meNOG,0XNSK@NOG,138VK@opiNOG,1CWPX@veNOG,KOG1216@euNOG	04IM7|0.0|3619.2	V, W	Trypsin Inhibitor like cysteine rich domain
g_1774	9031.ENSGALP00000011671	1.6e-42	139.1	MB21D2				aveNOG[1]	04ICD@aveNOG,0A1JV@biNOG,0DP7X@chorNOG,0VCFH@meNOG,0XNRJ@NOG,12T2S@opiNOG,1CY5U@veNOG,KOG3963@euNOG	KOG3963|2e-08|37.3	T	C. elegans
g_1775	9103.ENSMGAP00000017406	1.7e-295	973.1					aveNOG[1]	0XNRJ@NOG,KOG3963@euNOG	KOG3963|8.4e-108|365.4	T	C. elegans
g_1782	9103.ENSMGAP00000007515	6.6e-79	253.9					aveNOG[1]	04PK9@aveNOG,0A7EK@biNOG,0DUCS@chorNOG,0IYXW@euNOG,0VIER@meNOG,12CN4@NOG,13SSV@opiNOG,1D3QE@veNOG	0IYXW|6.5e-61|207.7	O	osteocrin
g_1783	9031.ENSGALP00000011687	8e-82	266.3					aveNOG[1]	04NW8@aveNOG,0A02S@biNOG,0DMN9@chorNOG,0IEC1@euNOG,0VAZ1@meNOG,11M36@NOG,12QTT@opiNOG,1CWHU@veNOG	0IEC1|1.4e-46|163.8	S	geminin coiled-coil domain containing
g_1784	9103.ENSMGAP00000007552	0	1506.4					aveNOG[1]	04HQ2@aveNOG,0A3M9@biNOG,0DR84@chorNOG,0IEPH@euNOG,0V8R0@meNOG,0ZRCQ@NOG,13JI1@opiNOG,1CVG8@veNOG	0IEPH|1.6e-299|998.2	T	Interleukin 1 receptor accessory protein
g_1786	9031.ENSGALP00000011742	8.5e-173	564.2	CLDN16		K06087		aveNOG[1]	04G7W@aveNOG,09VDM@biNOG,0DGN4@chorNOG,0IEIE@euNOG,0V6CK@meNOG,0XP0E@NOG,12P8N@opiNOG,1CRC0@veNOG	0IEIE|2.7e-141|473.3	P	Claudin 16
g_1787	9103.ENSMGAP00000007606	1.7e-143	467	CLDN1		K06087		aveNOG[1]	04FQR@aveNOG,09TUD@biNOG,0DF4P@chorNOG,0IG63@euNOG,0V4TM@meNOG,11GMP@NOG,13MY5@opiNOG,1CPUI@veNOG	0IG63|8.8e-119|398.3	U	claudin 1
g_1788	43179.ENSSTOP00000005824	2.4e-51	164.5					aveNOG[1]	09Z1A@biNOG,0DKGV@chorNOG,0UTEN@maNOG,0V9YV@meNOG,0XPXF@NOG,12SHB@opiNOG,18S5V@roNOG,1ASP8@spriNOG,1CVAS@veNOG,KOG4459@euNOG	1ASP8|3.2e-46|162.1	O	Leprecan-like 1
g_1789	9031.ENSGALP00000011808	0	1218.9					aveNOG[1]	09Z1A@biNOG,0DKGV@chorNOG,0V9YV@meNOG,0XPXF@NOG,12SHB@opiNOG,1CVAS@veNOG,KOG4459@euNOG	1CVAS|0.0|1085.9	O	Leprecan-like 1
g_1790	9103.ENSMGAP00000001036	0	1128.6	TP63	GO:0000075,GO:0000077,GO:0000122,GO:0000785,GO:0001071,GO:0002039,GO:0003674,GO:0003676,GO:0003677,GO:0003682,GO:0003684,GO:0003690,GO:0003700,GO:0005488,GO:0005515,GO:0005575,GO:0005622,GO:0005623,GO:0005634,GO:0005654,GO:0005667,GO:0005694,GO:0005737,GO:0005829,GO:0006355,GO:0006357,GO:0006915,GO:0006950,GO:0006974,GO:0006978,GO:0007049,GO:0007093,GO:0007154,GO:0007165,GO:0007346,GO:0008150,GO:…	K10149		aveNOG[1]	04NBP@aveNOG,09V1T@biNOG,0DGB6@chorNOG,0IGE4@euNOG,0V61G@meNOG,0XV9W@NOG,13MYH@opiNOG,1CR0N@veNOG	0IGE4|4.7e-170|571.6	K	tumor protein
g_1791	13735.ENSPSIP00000018044	6.5e-54	174					aveNOG[1]	09V1T@biNOG,0DGB6@chorNOG,0IGE4@euNOG,0V61G@meNOG,0XV9W@NOG,13MYH@opiNOG,1CR0N@veNOG	0IGE4|1.4e-20|77.2	K	tumor protein
g_1796	9031.ENSGALP00000011884	0	1633.9	BCL6	GO:0000003,GO:0000018,GO:0000060,GO:0000122,GO:0000902,GO:0001558,GO:0001775,GO:0001817,GO:0001818,GO:0001952,GO:0001953,GO:0002250,GO:0002262,GO:0002376,GO:0002460,GO:0002467,GO:0002520,GO:0002521,GO:0002637,GO:0002682,GO:0002683,GO:0002684,GO:0002694,GO:0002695,GO:0002696,GO:0002697,GO:0002698,GO:0002700,GO:0002701,GO:0002703,GO:0002706,GO:0002712,GO:0002718,GO:0002719,GO:0002819,GO:0002822,GO:…	K15618		aveNOG[1]	04MSN@aveNOG,09XWA@biNOG,0DR8Z@chorNOG,0VDGI@meNOG,13N4K@opiNOG,1CW7H@veNOG,COG5048@NOG,KOG1721@euNOG	04MSN|0.0|1728.6	K	lymphoma 6
g_1798	13735.ENSPSIP00000016361	7.3e-69	220.6					aveNOG[1]	0A7NK@biNOG,0DUEX@chorNOG,0IXQ5@euNOG,0VIH3@meNOG,11WUI@NOG,13S4P@opiNOG,1D3SP@veNOG	0IXQ5|1.3e-64|219.6	O	somatostatin
g_1799	9031.ENSGALP00000011986	0	1733.9	MASP1		K03992		aveNOG[1]	04MVS@aveNOG,09UJW@biNOG,0DFVH@chorNOG,0V5J3@meNOG,13HY4@opiNOG,1CQIW@veNOG,COG5640@NOG,KOG3627@euNOG	04MVS|0.0|1765.0	O	mannan-binding lectin serine peptidase 1 (C4 C2 activating component of Ra-reactive factor)
g_1800	9103.ENSMGAP00000007785	7e-111	362.5					aveNOG[1]	04PMP@aveNOG,09WVI@biNOG,0DTMI@chorNOG,0IH22@euNOG,0VEXE@meNOG,11X4F@NOG,13PC0@opiNOG,1D1CR@veNOG	0IH22|1.2e-56|196.0	T	receptor (chemosensory) transporter protein
g_1801	9031.ENSGALP00000039402	2e-144	470.6					aveNOG[1]	09TPA@biNOG,0DEZP@chorNOG,0J26W@euNOG,0V4NG@meNOG,116U6@NOG,13VPH@opiNOG,1CPPF@veNOG	0J26W|1.8e-76|261.0	T	programmed cell death 1
g_1803	59729.ENSTGUP00000009769	8.5e-71	230.4					aveNOG[1]	04Q1F@aveNOG,0A6VY@biNOG,0DTUM@chorNOG,0VHQ2@meNOG,11RVM@NOG,13UXT@opiNOG,1D36N@veNOG,KOG4108@euNOG	KOG4108|5.6e-55|190.6	N	Tctex1 domain containing
g_1805	9031.ENSGALP00000012069	3.9e-254	836.3	PCYT1A		K00968		aveNOG[1]	04JTC@aveNOG,09VIU@biNOG,0DGTJ@chorNOG,0V5XT@meNOG,12Q38@opiNOG,1CRHK@veNOG,COG0615@NOG,KOG2804@euNOG	KOG2804|3.1e-141|475.3	I	Cytidylyltransferase
g_1806	9031.ENSGALP00000012073	1.9e-218	716.3	SLC51A		K14360		aveNOG[1]	04MMP@aveNOG,09Z25@biNOG,0DK6N@chorNOG,0IKZG@euNOG,0V9ZK@meNOG,0XW07@NOG,135TK@opiNOG,1CRXZ@veNOG	0IKZG|2.2e-141|474.3	P	solute carrier family 51, alpha subunit
g_1808	9031.ENSGALP00000039372	0	1110.1	TFRC	GO:0005575,GO:0016020	K06503		aveNOG[1]	04HW1@aveNOG,0A06Y@biNOG,0DNX1@chorNOG,0VC7D@meNOG,12TKD@opiNOG,1CXWW@veNOG,COG2234@NOG,KOG2195@euNOG	KOG2195|2.5e-110|374.0	O, P	glutamate carboxypeptidase
g_1810	9103.ENSMGAP00000007998	0	2390.4					aveNOG[1]	04IKP@aveNOG,09TTH@biNOG,0DF3V@chorNOG,0V4SU@meNOG,0XPRC@NOG,12QVD@opiNOG,1CPTP@veNOG,KOG0199@euNOG	KOG0199|3.4e-271|905.7	T	tyrosine kinase, non-receptor
g_1811	9103.ENSMGAP00000008027	0	2264.5					aveNOG[1]	04IVB@aveNOG,09ZES@biNOG,0DKX2@chorNOG,0IHUZ@euNOG,0VABU@meNOG,11F6U@NOG,13J14@opiNOG,1CVSA@veNOG	04IVB|0.0|2279.0	T	NIDO
g_1812	28377.ENSACAP00000018889	9e-161	527.4					aveNOG[1]	09ZES@biNOG,0DKX2@chorNOG,0IHUZ@euNOG,0VABU@meNOG,11F6U@NOG,13J14@opiNOG,1CVSA@veNOG	1CVSA|1.6e-178|599.4	T	Mucin 4, cell surface associated
g_1814	88036.EFJ26958	1.8e-168	552					aveNOG[1]	1BIQV@strNOG,1DSGT@virNOG,COG0415@NOG,KOG0133@euNOG	1DSGT|6.4e-203|680.6	L	photo-lyase
g_1815	121225.PHUM136060-PA	1.1e-161	530.5					aveNOG[1]	03I0X@artNOG,0B6C6@biNOG,0ITGR@euNOG,0T4D7@inNOG,0WJ25@meNOG,0XQ7T@NOG,13G08@opiNOG	0ITGR|2.9e-168|565.7	T	DUF4206
g_1816	9031.ENSGALP00000012267	5.4e-46	149.4					aveNOG[1]	09VZD@biNOG,0DQ4X@chorNOG,0V6XT@meNOG,12TVR@opiNOG,1CZ64@veNOG,COG4886@NOG,KOG0532@euNOG	0DQ4X|4.3e-23|85.6	Z	Leucine-rich repeats and calponin homology (CH) domain containing
g_1817	9031.ENSGALP00000012288	5.4e-230	754.8	IQCG				aveNOG[1]	04HNZ@aveNOG,09ZQG@biNOG,0DM8E@chorNOG,0IFH5@euNOG,0VAM1@meNOG,0ZKIR@NOG,13HQZ@opiNOG,1CW3I@veNOG	0IFH5|3.5e-121|408.6	S	IQ motif containing G
g_1819	9031.ENSGALP00000012293	1.2e-77	252.2	RPL35A		K02917		aveNOG[1]	04PNR@aveNOG,0A7GB@biNOG,0DU97@chorNOG,0VIB3@meNOG,13SUD@opiNOG,1D3M3@veNOG,COG2451@NOG,KOG0887@euNOG	KOG0887|2.7e-56|194.6	J	Ribosomal protein
g_1820	10116.ENSRNOP00000023592	5.3e-33	105.3					aveNOG[1]	0A7SG@biNOG,0DUI2@chorNOG,0J5D9@euNOG,0UT4Q@maNOG,0VIKZ@meNOG,12AI0@NOG,13XMI@opiNOG,1965N@roNOG,1AUFB@spriNOG,1D1D3@veNOG	0J5D9|1.8e-39|139.6	S	chromosome 2 open reading frame 72
g_1821	9031.ENSGALP00000012404	1e-196	646.6	PSMD1	GO:0000502,GO:0005575,GO:0005622,GO:0005623,GO:0022624,GO:0032991,GO:0043234,GO:0044424,GO:0044464	K03032		aveNOG[1]	04EWA@aveNOG,09TGZ@biNOG,0DETT@chorNOG,0V4FZ@meNOG,12PFV@opiNOG,1CPHJ@veNOG,COG5116@NOG,KOG2062@euNOG	KOG2062|3.3e-124|419.9	O	26S proteasome
g_1822	10090.ENSMUSP00000136581	2.9e-61	192.7					aveNOG[1]	0B5RT@biNOG,0ISKJ@euNOG,0WIE6@meNOG,0Y7WS@NOG,13F6A@opiNOG	0ISKJ|2.7e-48|168.3	O	NA
g_1824	9103.ENSMGAP00000008314	7.6e-284	928.2	B3GNT7		K09664		aveNOG[1]	04I77@aveNOG,09UYH@biNOG,0DG7Z@chorNOG,0V5YE@meNOG,0ZZ1B@NOG,13HI7@opiNOG,1CQXF@veNOG,KOG2287@euNOG	04I77|3.1e-288|958.9	G	UDP-GlcNAc betaGal beta-1,3-N-acetylglucosaminyltransferase
g_1826	13735.ENSPSIP00000002394	4.3e-282	928.2					aveNOG[1]	0B58J@biNOG,0E8SB@chorNOG,0IRS7@euNOG,0WHV7@meNOG,0XSFV@NOG,13ECT@opiNOG,1DFPC@veNOG	0IRS7|5.3e-269|898.4	A, J	nucleolin
g_1828	9031.ENSGALP00000014949	3e-277	907.4	NMUR1				aveNOG[1]	04IQF@aveNOG,09VPV@biNOG,0DGYG@chorNOG,0V6NX@meNOG,0XRW9@NOG,13GR8@opiNOG,1CRNQ@veNOG,KOG3656@euNOG	04IQF|1.6e-282|940.2	T	Serpentine type 7TM GPCR chemoreceptor Srsx
g_1830	28377.ENSACAP00000011917	2.7e-52	167.5					aveNOG[1]	0AAFD@biNOG,0DW9V@chorNOG,0J563@euNOG,0VMKJ@meNOG,0ZA5I@NOG,13ZX5@opiNOG,1D5JJ@veNOG	0J563|1.2e-48|168.1	S	prothymosin, alpha
g_1835	9031.ENSGALP00000012557	1.4e-172	567.9	COPS7B		K12180		aveNOG[1]	04MA9@aveNOG,09WFF@biNOG,0DHQT@chorNOG,0V7DZ@meNOG,0XP7W@NOG,12PWT@opiNOG,1CSF4@veNOG,KOG3250@euNOG	KOG3250|3.4e-99|336.5	O, T	COP9 (constitutive photomorphogenic) homolog, subunit
g_1836	13616.ENSMODP00000003054	1.2e-30	97.7					aveNOG[1]	0A7IF@biNOG,0DUBA@chorNOG,0IZBQ@euNOG,0UVHB@maNOG,0VID3@meNOG,0YUR4@NOG,13TT9@opiNOG,1D3NU@veNOG	0IZBQ|8.7e-27|97.9	T	natriuretic peptide C
g_1839	13616.ENSMODP00000038556	3.6e-28	88					aveNOG[1]	0B40G@biNOG,0E819@chorNOG,0IPDM@euNOG,0V2ZS@maNOG,0WGFN@meNOG,0XUS1@NOG,13CD4@opiNOG,1DF0J@veNOG	0IPDM|1.5e-06|31.5	J	NA
g_1840	7739.JGI91613	6.9e-36	116.2					aveNOG[1]	0A02V@biNOG,0DMNE@chorNOG,0V8M2@meNOG,12N9A@opiNOG,COG0557@NOG,COG5202@NOG,KOG2102@euNOG,KOG2705@euNOG	KOG2705|2.4e-14|55.9	K	Lysophosphatidylcholine acyltransferase 3
g_1841	7739.JGI91613	1.6e-48	156.4					aveNOG[1]	0A02V@biNOG,0DMNE@chorNOG,0V8M2@meNOG,12N9A@opiNOG,COG0557@NOG,COG5202@NOG,KOG2102@euNOG,KOG2705@euNOG	KOG2705|3.4e-48|168.0	K	Lysophosphatidylcholine acyltransferase 3
g_1842	7739.JGI91613	6.4e-108	353.1					aveNOG[1]	0A02V@biNOG,0DMNE@chorNOG,0V8M2@meNOG,12N9A@opiNOG,COG0557@NOG,COG5202@NOG,KOG2102@euNOG,KOG2705@euNOG	KOG2705|6.3e-117|395.7	K	Lysophosphatidylcholine acyltransferase 3
g_1843	7897.ENSLACP00000016419	0	1357.3					aveNOG[1]	09UZ6@biNOG,0DG8Q@chorNOG,0V5Z1@meNOG,12R0Z@opiNOG,1CQY7@veNOG,COG1785@NOG,KOG4126@euNOG	KOG4126|4.5e-219|733.5	P	Alkaline phosphatase
g_1844	7897.ENSLACP00000016419	0	1354.6					aveNOG[1]	09UZ6@biNOG,0DG8Q@chorNOG,0V5Z1@meNOG,12R0Z@opiNOG,1CQY7@veNOG,COG1785@NOG,KOG4126@euNOG	KOG4126|4.7e-219|733.4	P	Alkaline phosphatase
g_1845	9103.ENSMGAP00000008513	0	1697.5	ECEL1				aveNOG[1]	04IB9@aveNOG,09Z8X@biNOG,0DQCS@chorNOG,0VDKP@meNOG,13I3M@opiNOG,1CZEQ@veNOG,COG3590@NOG,KOG3624@euNOG	KOG3624|1e-184|620.0	E	Endothelin converting enzyme
g_1846	9103.ENSMGAP00000008531	0	1517.4					aveNOG[1]	04G7F@aveNOG,09XZB@biNOG,0DJCB@chorNOG,0V4T5@meNOG,12PQX@opiNOG,1CU4J@veNOG,COG0531@NOG,KOG1288@euNOG	04G7F|0.0|1585.4	P	solute carrier family 12 member 9-like
g_1847	7897.ENSLACP00000017718	1.6e-184	605.8					aveNOG[1]	0A3EY@biNOG,0DQ5R@chorNOG,0VE9T@meNOG,13IXX@opiNOG,1D06S@veNOG,COG5640@NOG,KOG3627@euNOG	0DQ5R|5.7e-218|729.1	E	Tryp_SPc
g_1848	9031.ENSGALP00000012809	0	1163.3					aveNOG[1]	0A15J@biNOG,0DNTC@chorNOG,0VC1Q@meNOG,0XQGR@NOG,12UF2@opiNOG,1CVQH@veNOG,KOG3645@euNOG	0A15J|2e-289|964.2	T	cholinergic receptor, nicotinic, delta (muscle)
g_1849	9103.ENSMGAP00000008678	0	1151.1	CHRNG	GO:0005575,GO:0005623,GO:0005886,GO:0016020,GO:0044456,GO:0044464,GO:0045202,GO:0045211,GO:0071944,GO:0097060	K04818		aveNOG[1]	04JBK@aveNOG,09V5G@biNOG,0DGEJ@chorNOG,0V654@meNOG,0XQGR@NOG,12NHR@opiNOG,1CR42@veNOG,KOG3645@euNOG	04JBK|0.0|1206.1	T	Neurotransmitter-gated ion-channel ligand binding domain
g_1851	9031.ENSGALP00000013145	1.6e-255	835.5			K17857		aveNOG[1]	04N4E@aveNOG,0A256@biNOG,0DPTC@chorNOG,0VD0P@meNOG,12SIP@opiNOG,1CYSH@veNOG,COG2124@NOG,KOG0156@euNOG	04N4E|3e-261|871.0	Q	cytochrome P450
g_1852	9103.ENSMGAP00000008814	0	1091.5			K17857		aveNOG[1]	04HSH@aveNOG,09TUB@biNOG,0DYCK@chorNOG,0V59K@meNOG,12SZU@opiNOG,1D7IA@veNOG,COG2124@NOG,KOG0156@euNOG	04HSH|0.0|1068.5	Q	cytochrome P450
g_1853	9031.ENSGALP00000013512	1e-233	771	CAPN10		K08579		aveNOG[1]	04HXS@aveNOG,0A23Q@biNOG,0DKKS@chorNOG,0VCZ4@meNOG,0XP0B@NOG,13MXA@opiNOG,1CVF7@veNOG,KOG0045@euNOG	KOG0045|1.5e-104|353.3	O, T	Calpain-like cysteine peptidase
g_1855	9031.ENSGALP00000013530	0	1318.7	RNPEPL1		K09605		aveNOG[1]	04JN6@aveNOG,09TJ3@biNOG,0DHVH@chorNOG,0V4I1@meNOG,12P0U@opiNOG,1CSK3@veNOG,COG0308@NOG,KOG1047@euNOG	KOG1047|3.4e-210|704.0	E, I, O, V	Leukotriene A-4 hydrolase
g_1856	9031.ENSGALP00000013610	0	1335.4	ABCC5		K05668		aveNOG[1]	04I8F@aveNOG,09UMJ@biNOG,0DH03@chorNOG,0V5UG@meNOG,12PGU@opiNOG,1CV0D@veNOG,COG1132@NOG,KOG0054@euNOG	04I8F|0.0|1381.5	Q	ATP-binding cassette, sub-family C (CFTR MRP), member 5
g_1858	9031.ENSGALP00000013630	0	1612.8	EIF2B5		K03240		aveNOG[1]	04NRM@aveNOG,09TRX@biNOG,0DF2A@chorNOG,0V4R8@meNOG,12QAR@opiNOG,1CPS2@veNOG,COG1208@NOG,KOG1461@euNOG	KOG1461|1.6e-206|692.1	J	translation INITIATION FACTOR
g_1859	28377.ENSACAP00000010499	6.7e-32	104.1					aveNOG[1]	09VBI@biNOG,0DGK1@chorNOG,0V6AU@meNOG,0Y5G4@NOG,12TU6@opiNOG,1CR9W@veNOG,KOG3571@euNOG	KOG3571|4e-26|95.5	O	dishevelled, dsh homolog
g_1860	13735.ENSPSIP00000016516	0	1472.7					aveNOG[1]	09VBI@biNOG,0DGK1@chorNOG,0V6AU@meNOG,0Y5G4@NOG,12TU6@opiNOG,1CR9W@veNOG,KOG3571@euNOG	KOG3571|3.1e-234|783.0	O	dishevelled, dsh homolog
[truncated: 10,588 more rows]

## Sheet: Table S3
Table S3: Gene ontology enrichment analysis of the 75 gene families that significantly expanded in Pternistis bicalcaratus ayesha in comparison to Ficedula albicollis, Taeniopygia guttata, Anas platyrhynchos, Meleagris gallopavo, Gallus gallus, Pavo cristatus, and Coturnix japonica
[truncated: 80 more rows]

[truncated: 1 more sheets: Table S4]
